# Supplementary material
Source: publisher figshare collection journal article supplement (https://acs.figshare.com/ndownloader/files/17916239)
Supplement: Supplementary file 1 [file 17916239]

## Sheet: Supplementary Table S1
Table S1: LFQ values for proteins that co-immunoprecipitated with DNAJC11WT-FLAG in HEK293 cells identified by LC-MS/MS analysis after quantification with MaxQuant program in gene name alphabetical order.
LFQ intensity DnaJC11_FLAG_1	LFQ intensity DnaJC11_FLAG_2	LFQ intensity DnaJC11_FLAG_3	LFQ intensity Negative_Control_1	LFQ intensity Negative_Control_2	LFQ intensity Negative_Control_3	N: Peptides	N: Razor + unique peptides	N: Unique peptides	N: Sequence coverage [%]	N: Unique + razor sequence coverage [%]	N: Unique sequence coverage [%]	N: Mol. weight [kDa]	N: Q-value	N: Score	N: Intensity	N: MS/MS count	T: Protein IDs	T: Majority protein IDs	T: Protein names	T: Gene names
0	0	1852700	7813200	0	2665100	5	5	5	7.5	7.5	7.5	163.29	0	33.23	9750600	23	P01023;P20742-2;P20742	P01023	Alpha-2-macroglobulin	A2M
0	0	13078000	0	0	0	1	1	1	3.2	3.2	3.2	106.81	0.026087	0.95984	15552000	1	P49588;P49588-2	P49588;P49588-2	Alanine--tRNA ligase, cytoplasmic	AARS
370880	0	408920	0	0	281470	2	2	2	3.5	3.5	3.5	67.314	0	3.9569	1070700	4	P61221	P61221	ATP-binding cassette sub-family E member 1	ABCE1
206970	0	0	0	0	0	2	2	2	5.7	5.7	5.7	46.588	0	55.954	206970	2	P11310;P11310-2	P11310;P11310-2	Medium-chain specific acyl-CoA dehydrogenase, mitochondrial	ACADM
2106800	0	0	0	0	0	9	1	1	27.3	4.2	4.2	42.051	1	-2	2106800	1	P68133;P68032;P63267;P62736	P68133;P68032;P63267;P62736	Actin, alpha skeletal muscle;Actin, alpha cardiac muscle 1;Actin, gamma-enteric smooth muscle;Actin, aortic smooth muscle	ACTA1;ACTC1;ACTG2;ACTA2
0	0	0	0	0	10140000	4	1	1	14.1	4.8	4.8	42.003	0	2.5437	15079000	9	Q562R1	Q562R1	Beta-actin-like protein 2	ACTBL2
25104000	24584000	25084000	10380000	21068000	24915000	12	12	4	39.7	39.7	16.5	41.792	0	159.42	107140000	111	P63261;P60709;P63267-2;Q6S8J3;A5A3E0;P0CG38;Q9BYX7;P0CG39	P63261;P60709	Actin, cytoplasmic 2;Actin, cytoplasmic 2, N-terminally processed;Actin, cytoplasmic 1;Actin, cytoplasmic 1, N-terminally processed	ACTG1;ACTB
78384	0	0	0	0	0	1	1	1	1.1	1.1	1.1	88.583	0.04244	0.73264	78384	1	Q9Y4W6	Q9Y4W6	AFG3-like protein 2	AFG3L2
0	0	74986	0	0	0	1	1	1	2.1	2.1	2.1	47.137	0.0070755	1.5728	249860	2	Q53H12	Q53H12	Acylglycerol kinase, mitochondrial	AGK
238580	0	0	0	0	0	1	1	1	1	1	1	97.096	0.041096	0.7521	238580	0	Q9HCK5	Q9HCK5	Protein argonaute-4	AGO4
11940000	0	0	0	0	0	1	1	1	0.8	0.8	0.8	252.5	1	-2	11940000	1	Q8WYP5;Q8WYP5-3;Q8WYP5-2	Q8WYP5;Q8WYP5-3;Q8WYP5-2	Protein ELYS	AHCTF1
0	0	207150	0	0	0	1	1	1	3.2	3.2	3.2	44.658	0.042636	0.72193	246320	1	P23526-2;P23526	P23526-2;P23526	Adenosylhomocysteinase	AHCY
0	0	638000	0	0	0	1	1	1	6.5	6.5	6.5	39.34	0.017647	1.1412	758650	3	P02765	P02765	Alpha-2-HS-glycoprotein;Alpha-2-HS-glycoprotein chain A;Alpha-2-HS-glycoprotein chain B	AHSG
143660	0	0	0	0	0	1	1	1	4.6	4.6	4.6	26.032	0.024735	0.97726	143660	1	O95831-6;O95831-4;O95831-3;O95831	O95831-6;O95831-4;O95831-3;O95831	Apoptosis-inducing factor 1, mitochondrial	AIFM1
0	314840	0	0	0	0	1	1	1	0.3	0.3	0.3	447.75	1	-2	131740	0	Q99996-5;Q99996-3;Q99996;Q99996-1;Q99996-6	Q99996-5;Q99996-3;Q99996;Q99996-1;Q99996-6	A-kinase anchor protein 9	AKAP9
4279000	0	3240300	2918900	0	1015500	12	10	10	24.3	20.7	20.7	69.366	0	15.146	10910000	23	CON__P02768-1;P02768;P02768-2;P02768-3	CON__P02768-1;P02768;P02768-2;P02768-3	Serum albumin	ALB
0	0	3239100	0	0	3690900	4	4	4	21	21	21	26.888	0	20.697	7338600	11	Q86V81	Q86V81	THO complex subunit 4	ALYREF
544030	0	0	0	0	0	1	1	1	6.1	6.1	6.1	31.86	0.030769	0.83551	544030	1	Q400G9-2;Q400G9	Q400G9-2;Q400G9	Archaemetzincin-1	AMZ1
0	0	0	0	0	3230200	1	1	1	2.6	2.6	2.6	57.002	0.021858	1.0297	2851500	1	Q8N6S4-2;Q8N6S4	Q8N6S4-2;Q8N6S4	Ankyrin repeat domain-containing protein 13C	ANKRD13C
0	0	0	0	0	248150000	1	1	1	0.6	0.6	0.6	210.81	0	2.8712	524870000	53	Q8N7Z5	Q8N7Z5	Putative ankyrin repeat domain-containing protein 31	ANKRD31
0	0	268810	0	0	0	1	1	1	0.7	0.7	0.7	153.58	0.041265	0.7538	319640	1	Q8N2N9;A6QL64	Q8N2N9;A6QL64	Ankyrin repeat domain-containing protein 36B;Ankyrin repeat domain-containing protein 36A	ANKRD36B;ANKRD36
419040	0	2466500	0	0	2298600	9	9	9	28.9	28.9	28.9	40.411	0	38.856	5317400	17	P07355-2;P07355;A6NMY6	P07355-2;P07355;A6NMY6	Annexin A2;Putative annexin A2-like protein	ANXA2;ANXA2P2
0	0	0	66970000	0	0	1	1	1	3.9	3.9	3.9	72.423	0.016878	1.2627	26788000	1	P08133-2;P08133	P08133-2;P08133	Annexin A6	ANXA6
0	0	2862800	0	0	2620400	5	5	5	22.8	22.8	22.8	30.777	0	27.602	5548000	13	P02647	P02647	Apolipoprotein A-I;Proapolipoprotein A-I;Truncated apolipoprotein A-I	APOA1
0	0	1326600	0	0	876560	2	2	2	42	42	42	11.175	0	13.08	2214100	6	P02652	P02652	Apolipoprotein A-II;Proapolipoprotein A-II;Truncated apolipoprotein A-II	APOA2
0	0	6306500	0	0	4010800	3	3	3	1.4	1.4	1.4	515.6	0	147.69	11741000	28	P04114	P04114	Apolipoprotein B-100;Apolipoprotein B-48	APOB
1040700	0	671010	0	0	617330	3	3	2	25	25	17.4	16.145	0	9.6559	2484400	7	P61204-2;P84077;P61204;P84085	P61204-2;P84077;P61204;P84085	ADP-ribosylation factor 3;ADP-ribosylation factor 1;ADP-ribosylation factor 5	ARF3;ARF1;ARF5
183350	0	0	0	0	0	2	1	1	11.7	5.6	5.6	20.511	0	2.3426	183350	1	P18085	P18085	ADP-ribosylation factor 4	ARF4
0	0	0	0	0	321360	1	1	1	6.2	6.2	6.2	29.044	1	-2	734540	1	P53365-2;P53365-3;P53365	P53365-2;P53365-3;P53365	Arfaptin-2	ARFIP2
0	0	0	0	0	456890	1	1	1	4.7	4.7	4.7	25.356	0.020913	1.0885	543590	2	P05089-3;P05089;P05089-2	P05089-3;P05089;P05089-2	Arginase-1	ARG1
0	0	0	0	0	130970	1	1	1	4	4	4	23.834	0.020833	1.0873	243020	1	Q9NWB6-3;Q9NWB6-2;Q9NWB6	Q9NWB6-3;Q9NWB6-2;Q9NWB6	Arginine and glutamate-rich protein 1	ARGLU1
0	0	0	6430600	0	0	1	1	1	9.8	9.8	9.8	12.547	0.0091533	1.4985	15904000	5	Q14CB8-4;Q14CB8-6;Q14CB8-7;Q14CB8-3;Q14CB8;Q14CB8-2	Q14CB8-4;Q14CB8-6;Q14CB8-7;Q14CB8-3;Q14CB8;Q14CB8-2	Rho GTPase-activating protein 19	ARHGAP19
0	0	0	1082300	0	0	1	1	1	4	4	4	36.794	0.0217	1.0085	1674100	2	Q3SXY8-2;Q3SXY8	Q3SXY8-2;Q3SXY8	ADP-ribosylation factor-like protein 13B	ARL13B
174180	0	0	0	0	0	1	1	1	4.8	4.8	4.8	21.539	0.036603	0.79503	174180	1	Q9NVJ2;Q96BM9	Q9NVJ2;Q96BM9	ADP-ribosylation factor-like protein 8B;ADP-ribosylation factor-like protein 8A	ARL8B;ARL8A
3714500	0	415900	0	0	0	4	4	4	16	16	16	31.28	0	10.324	4175000	7	Q9NVT9;Q9NVT9-2	Q9NVT9	Armadillo repeat-containing protein 1	ARMC1
88037	0	0	0	0	0	1	1	1	1.9	1.9	1.9	54.817	0.041841	0.76226	88037	1	P08243-3;P08243-2;P08243	P08243-3;P08243-2;P08243	Asparagine synthetase [glutamine-hydrolyzing]	ASNS
0	0	117590	0	0	0	3	3	3	5.9	5.9	5.9	57.947	0	2.8927	563310	3	Q9NVI7-3;Q9NVI7-2;Q5T9A4-3;Q9NVI7;Q5T9A4;Q5T9A4-2;Q5T2N8	Q9NVI7-3;Q9NVI7-2;Q5T9A4-3;Q9NVI7;Q5T9A4;Q5T9A4-2	ATPase family AAA domain-containing protein 3A;ATPase family AAA domain-containing protein 3B	ATAD3A;ATAD3B
3607500	0	633440	0	0	317390	12	12	12	15.4	15.4	15.4	113	0	21.51	4642900	16	P05023-4;P05023;P05023-3;P05023-2;P13637;P13637-2;P13637-3;P50993;Q13733;P20648	P05023-4;P05023;P05023-3;P05023-2	Sodium/potassium-transporting ATPase subunit alpha-1	ATP1A1
1080900	0	0	0	0	0	4	4	4	4.9	4.9	4.9	109.73	0	7.1971	1080900	5	P16615-5;P16615-2;P16615-3;P16615;P16615-4;O14983-3;O14983-2;O14983	P16615-5;P16615-2;P16615-3;P16615;P16615-4;O14983-3;O14983-2;O14983	Sarcoplasmic/endoplasmic reticulum calcium ATPase 2;Sarcoplasmic/endoplasmic reticulum calcium ATPase 1	ATP2A2;ATP2A1
4869600	0	1895800	1207500	0	1473800	10	10	10	21	21	21	59.75	0	27.177	9343000	25	P25705;P25705-2;P25705-3	P25705;P25705-2;P25705-3	ATP synthase subunit alpha, mitochondrial	ATP5A1
1426500	0	2842300	0	0	1574000	9	9	9	22.1	22.1	22.1	56.559	0	34.549	6666900	21	P06576	P06576	ATP synthase subunit beta, mitochondrial	ATP5B
2160200	0	0	0	0	0	6	6	6	22.5	22.5	22.5	32.996	0	12.598	2490300	7	P36542;P36542-2	P36542;P36542-2	ATP synthase subunit gamma, mitochondrial	ATP5C1
193450	0	0	0	0	0	1	1	1	4.7	4.7	4.7	28.908	0.01938	1.1221	193450	1	P24539	P24539	ATP synthase F(0) complex subunit B1, mitochondrial	ATP5F1
261770	0	0	0	0	0	2	2	2	49	49	49	5.7407	0.002551	1.8463	261770	2	P56134-4;P56134-3;P56134-2;P56134	P56134-4;P56134-3;P56134-2;P56134	ATP synthase subunit f, mitochondrial	ATP5J2
0	0	56501	0	0	0	1	1	1	10.7	10.7	10.7	11.428	0.005	1.7801	283810	1	O75964	O75964	ATP synthase subunit g, mitochondrial	ATP5L
0	0	291620	0	0	275040	2	2	2	9.9	9.9	9.9	23.277	0	3.2327	895340	4	P48047	P48047	ATP synthase subunit O, mitochondrial	ATP5O
0	0	0	0	0	823230	1	1	1	3.4	3.4	3.4	34.258	0	6.4833	814490	2	P25311	P25311	Zinc-alpha-2-glycoprotein	AZGP1
0	0	1820400	0	0	344250	5	5	5	25.6	25.6	25.6	23.772	0	11.535	3635400	7	O95816;O95816-2	O95816;O95816-2	BAG family molecular chaperone regulator 2	BAG2
551310	0	0	0	0	0	3	3	3	9.8	9.8	9.8	51.199	0	7.4905	551310	4	Q9UL15;Q9UL15-2	Q9UL15;Q9UL15-2	BAG family molecular chaperone regulator 5	BAG5
339080	0	0	0	0	0	2	2	2	2.3	2.3	2.3	96.798	0	2.2642	339080	3	P46379-4;P46379-5;P46379-2;P46379;P46379-3	P46379-4;P46379-5;P46379-2;P46379;P46379-3	Large proline-rich protein BAG6	BAG6
0	0	0	0	0	0	1	1	1	6.5	6.5	6.5	16.872	0.021544	0.99569	0	1	Q16611-2;Q16611	Q16611-2;Q16611	Bcl-2 homologous antagonist/killer	BAK1
0	0	0	927350	0	0	1	1	1	6.9	6.9	6.9	29.398	0.0086957	1.3503	370940	1	Q8N1L9	Q8N1L9	Basic leucine zipper transcriptional factor ATF-like 2	BATF2
0	0	290700	0	0	0	1	1	1	0.9	0.9	0.9	170.45	0.041379	0.75504	345680	1	Q9UIG0-2;Q9UIG0	Q9UIG0-2;Q9UIG0	Tyrosine-protein kinase BAZ1B	BAZ1B
0	0	146790	0	0	0	1	1	1	0.5	0.5	0.5	220.71	0.03012	0.82545	174560	0	Q9UIF8-4;Q9UIF8-2;Q9UIF8-5;Q9UIF8-3;Q9UIF8	Q9UIF8-4;Q9UIF8-2;Q9UIF8-5;Q9UIF8-3;Q9UIF8	Bromodomain adjacent to zinc finger domain protein 2B	BAZ2B
1662000	0	0	0	0	0	1	1	1	5.2	5.2	5.2	44.714	0.042969	0.72639	1662000	1	O75936	O75936	Gamma-butyrobetaine dioxygenase	BBOX1
0	0	0	0	0	1529200	1	1	1	7.4	7.4	7.4	34.769	0.043194	0.72948	4005800	2	Q3SYG4-5;Q3SYG4-6;Q3SYG4-2;Q3SYG4-4;Q3SYG4-7;Q3SYG4-3;Q3SYG4	Q3SYG4-5;Q3SYG4-6;Q3SYG4-2;Q3SYG4-4;Q3SYG4-7;Q3SYG4-3;Q3SYG4	Protein PTHB1	BBS9
0	0	63401	0	0	0	1	1	1	3.7	3.7	3.7	27.991	0.0090293	1.4642	248540	2	P51572;P51572-2	P51572;P51572-2	B-cell receptor-associated protein 31	BCAP31
0	0	0	0	0	524280	3	3	3	5.2	5.2	5.2	85.936	0	3.7742	1060500	3	Q9NYF8-4;Q9NYF8-3;Q9NYF8-2;Q9NYF8	Q9NYF8-4;Q9NYF8-3;Q9NYF8-2;Q9NYF8	Bcl-2-associated transcription factor 1	BCLAF1
0	0	0	187650	0	0	1	1	1	15.5	15.5	15.5	6.8417	0.026403	0.90413	75061	1	Q9H3K6-2;Q9H3K6	Q9H3K6-2;Q9H3K6	BolA-like protein 2	BOLA2
0	0	530580	0	0	0	2	2	2	15.3	15.3	15.3	19.438	0	2.7128	1034000	3	P35613-3;P35613-4;P35613-2;P35613	P35613-3;P35613-4;P35613-2;P35613	Basigin	BSG
0	0	0	0	0	197330	1	1	1	2.5	2.5	2.5	49.248	0.021622	1.0052	379790	0	Q9H8K7	Q9H8K7	Uncharacterized protein C10orf88	C10orf88
0	0	0	827800	0	0	1	1	1	2.4	2.4	2.4	41.036	0.016667	1.2486	331120	1	Q9BUA3	Q9BUA3	Uncharacterized protein C11orf84	C11orf84
0	0	0	0	0	265980	1	1	1	10.6	10.6	10.6	14.234	0.026359	0.90183	514910	1	E9PRG8	E9PRG8	Uncharacterized protein C11orf98	C11orf98
0	0	397210	0	0	385080	2	2	2	7	7	7	28.068	0.0025641	1.8512	762260	3	Q9Y224	Q9Y224	UPF0568 protein C14orf166	C14orf166
0	0	193570	0	0	0	1	1	1	11	11	11	26.016	0.018072	1.1974	230180	1	P02745	P02745	Complement C1q subcomponent subunit A	C1QA
1439400	0	876950	1255500	0	0	4	4	4	16.7	16.7	16.7	31.362	0	23.763	3168000	12	Q07021	Q07021	Complement component 1 Q subcomponent-binding protein, mitochondrial	C1QBP
0	0	193730	0	0	0	1	1	1	3.8	3.8	3.8	76.684	0.0026596	2.0301	230370	1	P09871	P09871	Complement C1s subcomponent;Complement C1s subcomponent heavy chain;Complement C1s subcomponent light chain	C1S
0	0	7974300	0	0	7436500	11	11	11	12.2	12.2	12.2	187.15	0	188.63	15467000	48	P01024	P01024	Complement C3;Complement C3 beta chain;C3-beta-c;Complement C3 alpha chain;C3a anaphylatoxin;Acylation stimulating protein;Complement C3b alpha chain;Complement C3c alpha chain fragment 1;Complement C3dg fragment;Complement C3g fragment;Complement C3d fragment;Complement C3f fragment;Complement C3c alpha chain fragment 2	C3
0	0	0	0	0	96147	1	1	1	1.3	1.3	1.3	88.029	0.031297	0.81355	72761	0	Q8ND61-2;Q8ND61	Q8ND61-2;Q8ND61	Uncharacterized protein C3orf20	C3orf20
0	0	4221400	0	0	2425700	5	5	5	6.3	6.3	6.3	192.78	0	14.168	7055900	11	P0C0L4;P0C0L5;P0C0L4-2	P0C0L4;P0C0L5;P0C0L4-2	Complement C4-A;Complement C4 beta chain;Complement C4-A alpha chain;C4a anaphylatoxin;C4b-A;C4d-A;Complement C4 gamma chain;Complement C4-B;Complement C4 beta chain;Complement C4-B alpha chain;C4a anaphylatoxin;C4b-B;C4d-B;Complement C4 gamma chain	C4A;C4B
0	0	1038500	0	0	1259100	4	4	4	15.4	15.4	15.4	29.246	0	3.9263	2254700	6	P00918	P00918	Carbonic anhydrase 2	CA2
0	0	0	0	0	88915	1	1	1	3.8	3.8	3.8	21.228	0.030211	0.82744	151670	1	Q9HB71-3;Q9HB71	Q9HB71-3;Q9HB71	Calcyclin-binding protein	CACYBP
212440	0	0	0	0	0	1	1	1	0.5	0.5	0.5	242.98	0.027331	0.87981	212440	1	P27708	P27708	CAD protein;Glutamine-dependent carbamoyl-phosphate synthase;Aspartate carbamoyltransferase;Dihydroorotase	CAD
1560900	0	1005200	0	0	0	4	4	4	30.8	30.8	30.8	15.892	0	24.177	3045900	6	Q9NZT1	Q9NZT1	Calmodulin-like protein 5	CALML5
0	0	0	0	0	294950	1	1	1	3.4	3.4	3.4	40.189	0.041436	0.75631	223210	1	Q8IU85-2;Q8IU85	Q8IU85-2;Q8IU85	Calcium/calmodulin-dependent protein kinase type 1D	CAMK1D
289400	0	0	0	0	0	2	2	2	2.4	2.4	2.4	117.89	0.0050125	1.781	332030	2	Q86VP6-2;Q86VP6	Q86VP6-2;Q86VP6	Cullin-associated NEDD8-dissociated protein 1	CAND1
5937700	0	551730	708860	0	693640	9	9	9	16.6	16.6	16.6	71.502	0	21.903	7400000	17	P27824-2;P27824;P27824-3	P27824-2;P27824;P27824-3	Calnexin	CANX
0	0	140660	0	0	0	1	1	1	1.6	1.6	1.6	76.861	0.0090703	1.4784	167270	1	Q14444-2;Q14444	Q14444-2;Q14444	Caprin-1	CAPRIN1
0	0	0	0	0	201220	1	1	1	5.8	5.8	5.8	19.775	0.02707	0.86941	331000	1	P47755-2;P52907;P47755	P47755-2;P52907;P47755	F-actin-capping protein subunit alpha-2;F-actin-capping protein subunit alpha-1	CAPZA2;CAPZA1
0	0	384930	0	0	454230	3	3	3	13.6	13.6	13.6	30.628	0	2.9533	860240	4	P47756-2;P47756	P47756-2;P47756	F-actin-capping protein subunit beta	CAPZB
0	0	0	0	0	121050	1	1	1	3	3	3	42.953	0.025338	0.92563	197490	1	Q9H257-3;Q9H257-2;Q9H257	Q9H257-3;Q9H257-2;Q9H257	Caspase recruitment domain-containing protein 9	CARD9
1335700	0	0	0	0	1305600	5	5	5	18.2	18.2	18.2	27.679	0	39.832	2647200	9	P31944	P31944	Caspase-14;Caspase-14 subunit p17, mature form;Caspase-14 subunit p10, mature form;Caspase-14 subunit p20, intermediate form;Caspase-14 subunit p8, intermediate form	CASP14
0	0	0	0	0	7458700	1	1	1	3.2	3.2	3.2	30.85	0.017893	1.1632	13741000	4	O75828	O75828	Carbonyl reductase [NADPH] 3	CBR3
0	377620	0	0	0	0	1	1	1	1.3	1.3	1.3	83.94	0.028125	0.84973	158010	0	Q569K6	Q569K6	Coiled-coil domain-containing protein 157	CCDC157
145590	0	0	0	0	0	1	1	1	3.5	3.5	3.5	55.317	0	2.1128	145590	1	Q96A33-2;Q96A33	Q96A33-2;Q96A33	Coiled-coil domain-containing protein 47	CCDC47
630420	0	0	0	0	0	1	1	1	4.1	4.1	4.1	55.587	0.048285	0.71601	630420	1	Q6ZRK6-2;Q6ZRK6	Q6ZRK6-2;Q6ZRK6	Coiled-coil domain-containing protein 73	CCDC73
0	0	0	0	0	94860	1	1	1	7.7	7.7	7.7	12.743	0	2.2145	202830	1	Q9H6F5-2;Q9H6F5	Q9H6F5-2;Q9H6F5	Coiled-coil domain-containing protein 86	CCDC86
607270	0	930040	0	0	661210	5	5	5	12.9	12.9	12.9	57.488	0	25.171	2255900	8	P78371;P78371-2	P78371;P78371-2	T-complex protein 1 subunit beta	CCT2
2170300	0	2990800	0	0	2014000	9	9	9	17.1	17.1	17.1	60.533	0	12.837	7979400	20	P49368;P49368-2;P68626	P49368;P49368-2	T-complex protein 1 subunit gamma	CCT3
2701800	0	1891000	736780	0	1145200	9	9	9	20.2	20.2	20.2	57.924	0	24.468	6310600	21	P50991;P50991-2	P50991;P50991-2	T-complex protein 1 subunit delta	CCT4
5013400	0	2174100	1763400	0	1436800	13	13	13	27.9	27.9	27.9	59.67	0	22.164	9808600	26	P48643;P48643-2	P48643;P48643-2	T-complex protein 1 subunit epsilon	CCT5
1834600	0	2610900	0	0	1913600	8	8	8	15.8	15.8	15.8	58.024	0	16.374	6559100	16	P40227;P40227-2;Q92526;Q92526-2;Q92526-3	P40227;P40227-2;Q92526	T-complex protein 1 subunit zeta;T-complex protein 1 subunit zeta-2	CCT6A;CCT6B
1109500	0	0	0	0	0	4	4	4	8.2	8.2	8.2	54.804	0	5.0174	1539000	5	Q99832-3;Q99832;Q99832-2;Q99832-4	Q99832-3;Q99832;Q99832-2;Q99832-4	T-complex protein 1 subunit eta	CCT7
1265500	0	561510	0	0	459920	6	6	6	14.7	14.7	14.7	51.586	0	18.782	2301700	10	P50990-3;P50990-2;P50990	P50990-3;P50990-2;P50990	T-complex protein 1 subunit theta	CCT8
0	0	0	13731000	0	0	1	1	1	4.8	4.8	4.8	37.717	0.048995	0.71152	5492300	1	P15813	P15813	Antigen-presenting glycoprotein CD1d	CD1D
69051	0	0	0	0	0	1	1	1	1.7	1.7	1.7	60.244	0.017964	1.1756	69051	1	O75419-2;O75419;O75419-3	O75419-2;O75419;O75419-3	Cell division control protein 45 homolog	CDC45
622330	0	449950	0	0	0	2	2	1	6.1	6.1	3.4	34.095	0	3.2338	1252800	5	P06493;P06493-2;O94921-2;Q9NYV4;Q9NYV4-2;Q14004-2;Q9NYV4-3;Q00536-2;Q00537-2;Q00537;Q07002-3;Q00536-3;Q00536;P50750-2;Q07002;O94921;Q96Q40;Q00535-2;Q96Q40-5;O94921-3;Q96Q40-3;Q96Q40-4;P50750;Q96Q40-6;Q00534;Q00526;P11802;P24941;Q00535;P24941-2;Q14004	P06493;P06493-2;O94921-2;Q9NYV4;Q9NYV4-2;Q14004-2;Q9NYV4-3;Q00536-2;Q00537-2;Q00537;Q07002-3;Q00536-3;Q00536;P50750-2;Q07002;O94921;Q96Q40;Q00535-2;Q96Q40-5;O94921-3;Q96Q40-3;Q96Q40-4;P50750;Q96Q40-6;Q00534;Q00526;P11802;P24941;Q00535;P24941-2;Q14004	Cyclin-dependent kinase 1;Cyclin-dependent kinase 14;Cyclin-dependent kinase 12;Cyclin-dependent kinase 13;Cyclin-dependent kinase 16;Cyclin-dependent kinase 17;Cyclin-dependent kinase 18;Cyclin-dependent kinase 9;Cyclin-dependent kinase 15;Cyclin-dependent-like kinase 5;Cyclin-dependent kinase 6;Cyclin-dependent kinase 3;Cyclin-dependent kinase 4;Cyclin-dependent kinase 2	CDK1;CDK14;CDK12;CDK13;CDK16;CDK17;CDK18;CDK9;CDK15;CDK5;CDK6;CDK3;CDK4;CDK2
0	0	0	0	0	164850	2	1	1	14.8	10.4	10.4	20.725	0.016949	1.2753	1647900	2	P11802-2	P11802-2	Cyclin-dependent kinase 4	CDK4
0	0	0	0	0	757650	1	1	1	2.4	2.4	2.4	61.124	1	-2	1885500	1	Q9NXV6	Q9NXV6	CDKN2A-interacting protein	CDKN2AIP
1336200	0	0	0	0	0	1	1	1	1.2	1.2	1.2	109.64	0.030488	0.8324	1336200	1	Q8N960-2;Q8N960	Q8N960-2;Q8N960	Centrosomal protein of 120 kDa	CEP120
304420	0	0	0	0	0	1	1	1	2	2	2	59.958	0.038407	0.77233	304420	1	O00748-2;O00748;O00748-5;O00748-4	O00748-2;O00748;O00748-5;O00748-4	Cocaine esterase	CES2
0	0	0	0	0	48856	1	1	1	2.1	2.1	2.1	85.411	0.0072639	1.6026	157130	2	CON__Q3KUS7;P00751	CON__Q3KUS7;P00751	Complement factor B;Complement factor B Ba fragment;Complement factor B Bb fragment	CFB
0	0	560980	0	0	497600	2	2	2	13.9	13.9	13.9	18.502	0	3.8763	1381000	5	P23528;Q9Y281-3;Q9Y281	P23528;Q9Y281-3;Q9Y281	Cofilin-1;Cofilin-2	CFL1;CFL2
1729400	0	1259900	0	0	0	3	3	3	16.7	16.7	16.7	26.152	0	31.933	3260600	6	Q9NX63	Q9NX63	MICOS complex subunit MIC19	CHCHD3
0	0	0	0	0	37745	1	1	1	4.3	4.3	4.3	26.457	0.038849	0.77992	186380	1	Q9BRQ6	Q9BRQ6	MICOS complex subunit MIC25	CHCHD6
0	0	0	0	0	11879000	1	1	1	2.1	2.1	2.1	63.873	0.029549	0.84398	44108000	3	Q96EP1-5;Q96EP1-3;Q96EP1-2;Q96EP1-4;Q96EP1	Q96EP1-5;Q96EP1-3;Q96EP1-2;Q96EP1-4;Q96EP1	E3 ubiquitin-protein ligase CHFR	CHFR
0	0	0	0	0	566820	1	1	1	6.4	6.4	6.4	21.918	0	4.7286	428950	1	Q9Y3Y2-4;Q9Y3Y2;Q9Y3Y2-3	Q9Y3Y2-4;Q9Y3Y2;Q9Y3Y2-3	Chromatin target of PRMT1 protein	CHTOP
0	0	0	0	0	249420	1	1	1	6.4	6.4	6.4	18.648	0	2.7267	542840	3	Q14011	Q14011	Cold-inducible RNA-binding protein	CIRBP
0	0	255420	0	0	0	3	3	3	10.8	10.8	10.8	42.644	0	5.0043	711410	4	P12277	P12277	Creatine kinase B-type	CKB
1765200	0	0	2564200	0	1357200	3	3	3	18.6	18.6	18.6	26.215	0	13.71	4326700	8	P54105	P54105	Methylosome subunit pICln	CLNS1A
341030	0	0	0	0	0	2	2	2	1.6	1.6	1.6	187.89	0.0025381	1.8352	449510	4	Q00610-2;Q00610	Q00610-2;Q00610	Clathrin heavy chain 1	CLTC
0	0	0	0	0	3680500	1	1	1	8.4	8.4	8.4	32.363	0.021583	1.003	9728300	2	P10909-3;P10909-4;P10909;P10909-5;P10909-2	P10909-3;P10909-4;P10909;P10909-5;P10909-2	Clusterin;Clusterin beta chain;Clusterin alpha chain	CLU
0	0	123890	0	0	0	1	1	1	3.5	3.5	3.5	31.38	0.026856	0.86304	147320	1	Q15417-3;Q15417	Q15417-3;Q15417	Calponin-3	CNN3
177810	0	0	0	0	0	1	1	1	3.5	3.5	3.5	45.098	0.022018	1.0379	177810	1	P09543-2;P09543	P09543-2;P09543	2,3-cyclic-nucleotide 3-phosphodiesterase	CNP
0	0	0	120390000	0	0	1	1	1	1.8	1.8	1.8	112.88	0.021938	1.0356	90762000	6	Q9P232	Q9P232	Contactin-3	CNTN3
5292900	0	0	0	0	0	2	2	2	1.6	1.6	1.6	138.94	0	4.6594	59303000	9	P02452;CON__Q862S4	P02452;CON__Q862S4	Collagen alpha-1(I) chain	COL1A1
0	0	0	6764200	0	0	1	1	1	0.9	0.9	0.9	166.86	0.04194	0.72974	2705700	1	A6NMZ7-2;A6NMZ7	A6NMZ7-2;A6NMZ7	Collagen alpha-6(VI) chain	COL6A6
153270	0	0	0	0	0	1	1	1	9.8	9.8	9.8	20.066	0.0071429	1.5904	153270	1	Q9NQ92	Q9NQ92	Coordinator of PRMT5 and differentiation stimulator	COPRS
0	0	0	0	0	318140	1	1	1	6.5	6.5	6.5	19.576	0	2.9335	1003100	3	P13073	P13073	Cytochrome c oxidase subunit 4 isoform 1, mitochondrial	COX4I1
0	0	0	0	0	429780	1	1	1	10.7	10.7	10.7	8.7813	0.031111	0.80543	840480	1	P09669	P09669	Cytochrome c oxidase subunit 6C	COX6C
0	0	2260300	0	0	2865200	4	4	4	9.4	9.4	9.4	122.2	0	13.729	5025800	8	P00450	P00450	Ceruloplasmin	CP
0	0	0	0	0	46086000	1	1	1	1.4	1.4	1.4	72.148	0.019194	1.1024	56932000	4	Q8IUR6;Q8IUR6-3	Q8IUR6;Q8IUR6-3	CREB3 regulatory factor	CREBRF
0	0	0	0	0	0	1	1	1	7.9	7.9	7.9	11.216	0.036232	0.78969	0	1	Q9P021	Q9P021	Cysteine-rich PDZ-binding protein	CRIPT
0	0	0	3071300	0	0	1	1	1	1.7	1.7	1.7	66.394	0.042161	0.7312	1665900	0	Q16526	Q16526	Cryptochrome-1	CRY1
0	0	0	0	232770000	0	1	1	1	3	3	3	51.712	0.0049875	1.7714	112820000	11	O75390	O75390	Citrate synthase, mitochondrial	CS
0	0	75710	0	0	0	1	1	1	1	1	1	103.88	0.024958	0.91437	325150	2	P55060-4;P55060-3;P55060	P55060-4;P55060-3;P55060	Exportin-2	CSE1L
0	0	464810	0	0	1776100	2	2	2	19.4	19.4	19.4	11.006	0	18.945	2197000	5	P01040	P01040	Cystatin-A;Cystatin-A, N-terminally processed	CSTA
0	0	0	152510	0	0	1	1	1	12.2	12.2	12.2	11.139	0.030534	0.83245	256620	1	P04080	P04080	Cystatin-B	CSTB
238550	0	0	0	0	0	1	1	1	3.3	3.3	3.3	41.22	0.04104	0.75191	238550	1	P17812-2;Q9NRF8;P17812	P17812-2;Q9NRF8;P17812	CTP synthase 1;CTP synthase 2	CTPS1;CTPS2
0	0	0	0	0	817180	1	1	1	1.9	1.9	1.9	44.552	0.029503	0.84318	1004800	1	P07339	P07339	Cathepsin D;Cathepsin D light chain;Cathepsin D heavy chain	CTSD
0	0	9644200	0	0	0	1	1	1	2	2	2	81.092	0.017682	1.1445	12136000	4	Q13618-3;Q13618-2;Q13618	Q13618-3;Q13618-2;Q13618	Cullin-3	CUL3
0	0	0	0	0	191680	1	1	1	1.9	1.9	1.9	72.023	0.02994	0.81998	504900	1	P39880-9;P39880-3;Q13948-9;Q13948-10;Q13948-2;Q13948;O14529	P39880-9;P39880-3;Q13948-9;Q13948-10;Q13948-2;Q13948;O14529	Protein CASP;Homeobox protein cut-like 2	CUX1;CUX2
211820	0	0	0	0	0	1	1	1	8.2	8.2	8.2	16.332	0	4.3934	211820	1	O43169	O43169	Cytochrome b5 type B	CYB5B
388540	0	0	0	0	0	2	2	2	8.6	8.6	8.6	31.628	0	2.9048	388540	2	P00387-2;P00387;P00387-3	P00387-2;P00387;P00387-3	NADH-cytochrome b5 reductase 3;NADH-cytochrome b5 reductase 3 membrane-bound form;NADH-cytochrome b5 reductase 3 soluble form	CYB5R3
0	0	0	0	0	90704	1	1	1	3.1	3.1	3.1	33.384	0.027553	0.88748	68642	0	P20813-2;P20813	P20813-2;P20813	Cytochrome P450 2B6	CYP2B6
243000	0	0	0	0	0	1	1	1	10.3	10.3	10.3	10.631	0	2.5679	243000	1	Q9H1C7	Q9H1C7	Cysteine-rich and transmembrane domain-containing protein 1	CYSTM1
0	0	66259	0	0	0	1	1	1	8.8	8.8	8.8	12.497	0.0090909	1.4803	78789	1	P61803	P61803	Dolichyl-diphosphooligosaccharide--protein glycosyltransferase subunit DAD1	DAD1
0	0	357630	0	0	0	4	4	4	10	10	10	45.771	0	4.4836	631020	5	P14868-2;P14868	P14868-2;P14868	Aspartate--tRNA ligase, cytoplasmic	DARS
3077800	0	3347200	0	0	3581800	2	2	2	20	20	20	11.284	0	3.4931	10012000	7	P81605;P81605-2	P81605;P81605-2	Dermcidin;Survival-promoting peptide;DCD-1	DCD
0	0	0	0	0	1507600	1	1	1	0.3	0.3	0.3	322.23	0.025554	0.93305	3224100	0	Q6V1P9	Q6V1P9	Protocadherin-23	DCHS2
195660	0	0	0	0	0	2	2	2	1.7	1.7	1.7	126.97	0.0070588	1.5653	195660	2	Q16531	Q16531	DNA damage-binding protein 1	DDB1
746130	0	0	0	0	0	4	4	4	8.3	8.3	8.3	50.8	0	10.479	811570	4	P39656;P39656-3;P39656-2	P39656;P39656-3;P39656-2	Dolichyl-diphosphooligosaccharide--protein glycosyltransferase 48 kDa subunit	DDOST
0	0	0	0	0	150470	1	1	1	1.5	1.5	1.5	79.656	0.018256	1.2129	250800	1	Q9NR30-2;Q9NR30	Q9NR30-2;Q9NR30	Nucleolar RNA helicase 2	DDX21
2287400	0	1123800	1561200	0	1010800	12	12	12	19.8	19.8	19.8	71.354	0	55.641	5254200	23	O00571-2;O00571;O15523-2;O15523;O15523-3;Q9NQI0-3;Q9NQI0-2;Q9NQI0-4;Q9NQI0	O00571-2;O00571;O15523-2;O15523	ATP-dependent RNA helicase DDX3X;ATP-dependent RNA helicase DDX3Y	DDX3X;DDX3Y
0	0	469200	0	0	621170	4	4	4	6.9	6.9	6.9	60.563	0	3.8143	1453900	6	P17844-2;P17844;Q92841-1;Q92841-3;Q92841-2;Q92841	P17844-2;P17844	Probable ATP-dependent RNA helicase DDX5	DDX5
118900	0	0	0	0	0	1	1	1	4.8	4.8	4.8	26.423	0.017751	1.1468	118900	1	Q9BUN8-2;Q9BUN8	Q9BUN8-2;Q9BUN8	Derlin-1	DERL1
0	0	1453000	0	0	0	1	1	1	3.6	3.6	3.6	52.567	0.025729	0.9469	1727700	1	Q96DF8	Q96DF8	Protein DGCR14	DGCR14
0	0	0	0	9047900	0	1	1	1	1.1	1.1	1.1	130.32	0.041958	0.76341	2035700	1	Q16760-2;Q16760	Q16760-2;Q16760	Diacylglycerol kinase delta	DGKD
239530	0	0	0	0	0	1	1	1	1.7	1.7	1.7	54.489	0.0073892	1.6908	239530	1	Q9UBM7	Q9UBM7	7-dehydrocholesterol reductase	DHCR7
0	0	0	0	0	3797200	1	1	1	13.8	13.8	13.8	7.3432	0.0088692	1.4369	8208900	5	Q9P1J3	Q9P1J3	Putative uncharacterized protein DHRS4-AS1	DHRS4-AS1
311760	0	0	504990	0	0	2	2	2	2.9	2.9	2.9	90.932	0	4.2836	578890	6	O43143	O43143	Pre-mRNA-splicing factor ATP-dependent RNA helicase DHX15	DHX15
0	0	1052500	0	0	0	1	1	1	0.8	0.8	0.8	139.31	0.026224	0.96383	1251600	1	Q14562	Q14562	ATP-dependent RNA helicase DHX8	DHX8
0	0	0	0	0	233510	2	2	2	1.6	1.6	1.6	140.96	0.0074257	1.7131	275650	3	Q08211;Q08211-2	Q08211;Q08211-2	ATP-dependent RNA helicase A	DHX9
0	0	1583600	0	0	0	1	1	1	0.5	0.5	0.5	271.04	0.035451	0.80141	1883100	1	P11532-3;P11532-2;P11532-4;P11532	P11532-3;P11532-2;P11532-4;P11532	Dystrophin	DMD
0	0	0	199410	0	0	1	1	1	0.2	0.2	0.2	510.44	0.030349	0.83021	136440	0	Q96JB1-2;Q96JB1	Q96JB1-2;Q96JB1	Dynein heavy chain 8, axonemal	DNAH8
2545500	0	0	0	0	0	5	5	5	18.1	18.1	18.1	44.868	0	7.9407	3134300	7	P31689;P31689-2	P31689;P31689-2	DnaJ homolog subfamily A member 1	DNAJA1
955840	0	0	0	0	0	3	3	3	9	9	9	45.745	0	14.246	955840	4	O60884	O60884	DnaJ homolog subfamily A member 2	DNAJA2
654300	0	0	0	0	0	1	1	1	2.2	2.2	2.2	41.597	0.018219	1.2075	654300	1	Q8WW22-3;Q8WW22;Q8WW22-2	Q8WW22-3;Q8WW22;Q8WW22-2	DnaJ homolog subfamily A member 4	DNAJA4
434660000	106120000	126740000	0	3171100	6483300	21	21	21	49.9	49.9	49.9	57.196	0	323.31	687290000	208	Q9NVH1-3;Q9NVH1;Q9NVH1-2	Q9NVH1-3;Q9NVH1;Q9NVH1-2	DnaJ homolog subfamily C member 11	DNAJC11
904570	0	0	0	0	0	3	3	3	7.3	7.3	7.3	50.096	0	3.4575	904570	3	Q99615-2;Q99615	Q99615-2;Q99615	DnaJ homolog subfamily C member 7	DNAJC7
0	91061	0	0	0	0	1	1	1	4.8	4.8	4.8	23.598	0.042328	0.73222	38103	0	Q92785-2;Q92785	Q92785-2;Q92785	Zinc finger protein ubi-d4	DPF2
171500	0	0	0	0	0	1	1	1	4.2	4.2	4.2	29.634	0.03003	0.82135	171500	1	O60762	O60762	Dolichol-phosphate mannosyltransferase subunit 1	DPM1
145100	0	0	0	0	0	1	1	1	10.9	10.9	10.9	10.094	0.025641	0.93642	145100	1	Q9P2X0;Q9P2X0-2	Q9P2X0;Q9P2X0-2	Dolichol-phosphate mannosyltransferase subunit 3	DPM3
0	0	831680	0	0	770560	3	3	3	4.5	4.5	4.5	93.834	0	3.3301	1681900	6	Q08554-2;Q08554	Q08554-2;Q08554	Desmocollin-1	DSC1
58392	0	0	0	0	0	1	1	1	1.1	1.1	1.1	93.453	0.038516	0.77308	58392	1	Q14574-2;Q14574	Q14574-2;Q14574	Desmocollin-3	DSC3
0	0	1500400	0	2976400	2811400	6	6	6	7.3	7.3	7.3	113.75	0	14.452	5438600	13	Q02413	Q02413	Desmoglein-1	DSG1
0	0	870960	0	0	1934400	9	9	9	3.4	3.4	3.4	331.77	0	18.527	2831600	21	P15924;P15924-3;P15924-2	P15924;P15924-3;P15924-2	Desmoplakin	DSP
0	0	0	0	0	296630	1	1	1	4.3	4.3	4.3	21.064	0	2.2077	12606000	2	P23919-2;P23919	P23919-2;P23919	Thymidylate kinase	DTYMK
0	0	0	1597000	0	0	1	1	1	1	1	1	137.6	0.027157	0.87349	2808800	7	Q9NRD9-2;Q9NRD9	Q9NRD9-2;Q9NRD9	Dual oxidase 1	DUOX1
0	0	230030	0	0	0	1	1	1	7.3	7.3	7.3	17.748	0.013015	1.3378	273530	1	P33316-2;P33316	P33316-2;P33316	Deoxyuridine 5-triphosphate nucleotidohydrolase, mitochondrial	DUT
0	0	0	0	0	165660	1	1	1	12.4	12.4	12.4	10.35	0.025168	0.91947	280360	1	Q96FJ2;P63167	Q96FJ2;P63167	Dynein light chain 2, cytoplasmic;Dynein light chain 1, cytoplasmic	DYNLL2;DYNLL1
0	0	35496	0	0	0	1	1	1	0.7	0.7	0.7	138.6	0.042895	0.73829	42209	0	Q86Y13	Q86Y13	E3 ubiquitin-protein ligase DZIP3	DZIP3
124490	0	0	0	0	0	1	1	1	5.2	5.2	5.2	26.352	0.019268	1.1097	124490	1	Q15125	Q15125	3-beta-hydroxysteroid-Delta(8),Delta(7)-isomerase	EBP
5463500	18507000	30836000	3797200	12156000	26360000	9	9	9	22.7	22.7	22.7	50.184	0	32.945	78701000	52	Q5VTE0;P68104;P68104-2;Q05639	Q5VTE0;P68104;P68104-2;Q05639	Putative elongation factor 1-alpha-like 3;Elongation factor 1-alpha 1;Elongation factor 1-alpha 2	EEF1A1P5;EEF1A1;EEF1A2
571050	0	0	0	0	0	2	2	2	14.7	14.7	14.7	24.763	0	9.9218	747580	4	P24534	P24534	Elongation factor 1-beta	EEF1B2
0	0	0	0	0	125470	1	1	1	4.7	4.7	4.7	28.558	0.024691	0.97633	217790	2	P29692-3;P29692;P29692-2	P29692-3;P29692;P29692-2	Elongation factor 1-delta	EEF1D
2018800	0	1399200	0	0	1198000	6	6	6	12.1	12.1	12.1	50.118	0	23.542	4671600	11	P26641;P26641-2	P26641;P26641-2	Elongation factor 1-gamma	EEF1G
0	0	230460	0	0	431740	4	4	4	4.5	4.5	4.5	95.337	0	3.6471	735290	4	P13639	P13639	Elongation factor 2	EEF2
0	0	0	0	0	1530000	1	1	1	0.8	0.8	0.8	125.21	0.025253	0.92029	4096600	1	Q9NZJ5	Q9NZJ5	Eukaryotic translation initiation factor 2-alpha kinase 3	EIF2AK3
0	0	44155	0	0	0	1	1	1	3	3	3	38.388	0.017857	1.16	52505	1	P20042	P20042	Eukaryotic translation initiation factor 2 subunit 2	EIF2S2
0	0	424070	0	0	446030	3	3	3	4.1	4.1	4.1	92.48	0	4.3478	1024600	6	P55884;P55884-2	P55884;P55884-2	Eukaryotic translation initiation factor 3 subunit B	EIF3B
0	0	232420	0	0	0	2	2	2	7.3	7.3	7.3	37.563	0	2.92	402260	3	O00303	O00303	Eukaryotic translation initiation factor 3 subunit F	EIF3F
0	0	376750	0	0	388630	2	2	2	6.9	6.9	6.9	35.611	0.007335	1.6671	741790	3	O75821	O75821	Eukaryotic translation initiation factor 3 subunit G	EIF3G
0	0	0	0	0	117970	1	1	1	2.8	2.8	2.8	39.93	0.027508	0.88715	89273	1	O15372	O15372	Eukaryotic translation initiation factor 3 subunit H	EIF3H
0	0	707530	0	0	642700	3	3	3	11.7	11.7	11.7	36.501	0	4.6075	1355200	5	Q13347	Q13347	Eukaryotic translation initiation factor 3 subunit I	EIF3I
0	0	0	0	0	118050	1	1	1	1.6	1.6	1.6	61.013	0.048101	0.71268	161910	1	Q9Y262-2;Q9Y262	Q9Y262-2;Q9Y262	Eukaryotic translation initiation factor 3 subunit L	EIF3L
1596700	0	0	0	0	0	4	4	4	11.3	11.3	11.3	46.153	0	21.451	1771300	6	P60842;P60842-2;Q14240;Q14240-2	P60842;P60842-2;Q14240;Q14240-2	Eukaryotic initiation factor 4A-I;Eukaryotic initiation factor 4A-II;Eukaryotic initiation factor 4A-II, N-terminally processed	EIF4A1;EIF4A2
0	0	0	0	0	0	1	1	1	3.2	3.2	3.2	46.871	1	-2	0	1	P38919	P38919	Eukaryotic initiation factor 4A-III;Eukaryotic initiation factor 4A-III, N-terminally processed	EIF4A3
1867600	0	11717000	0	0	9245900	8	8	8	13.7	13.7	13.7	69.15	0	24.273	22900000	22	P23588;P23588-2	P23588;P23588-2	Eukaryotic translation initiation factor 4B	EIF4B
0	0	0	0	0	232030	1	1	1	6.9	6.9	6.9	25.097	0.030581	0.83359	510910	1	P06730;P06730-3;P06730-2	P06730;P06730-3;P06730-2	Eukaryotic translation initiation factor 4E	EIF4E
0	0	946230	0	0	828520	3	3	3	27.9	27.9	27.9	16.773	0	4.8917	2719200	5	Q6IS14;P63241;P63241-2;Q9GZV4	Q6IS14;P63241;P63241-2;Q9GZV4	Eukaryotic translation initiation factor 5A-1-like;Eukaryotic translation initiation factor 5A-1;Eukaryotic translation initiation factor 5A-2	EIF5AL1;EIF5A;EIF5A2
0	0	364420	0	0	338320	2	2	2	6.7	6.7	6.7	36.091	0	2.8715	806630	5	Q15717;Q15717-2;Q12926-2;Q12926;P26378-4;P26378-2;P26378-5;P26378;P26378-3	Q15717;Q15717-2;Q12926-2;Q12926;P26378-4;P26378-2;P26378-5;P26378;P26378-3	ELAV-like protein 1;ELAV-like protein 2;ELAV-like protein 4	ELAVL1;ELAVL2;ELAVL4
15252000	0	693570	0	0	235360	9	9	9	46.1	46.1	46.1	28.994	0	123.85	16996000	25	P50402	P50402	Emerin	EMD
1600400	0	2162000	0	0	0	6	6	6	19.4	19.4	19.4	47.168	0	10.726	5518300	15	P06733;P06733-2;P13929-3;P09104-2;P13929-2;P13929;P09104	P06733;P06733-2	Alpha-enolase	ENO1
0	0	0	0	0	160200	1	1	1	8.6	8.6	8.6	11.99	0.04205	0.72988	274730	1	O43768-8;O43768-6;O43768-5;O43768-2;O43768;O43768-9;O43768-7;O43768-3;O43768-4	O43768-8;O43768-6;O43768-5;O43768-2;O43768;O43768-9;O43768-7;O43768-3;O43768-4	Alpha-endosulfine	ENSA
0	0	133840	0	0	0	1	1	1	1.2	1.2	1.2	109.87	0.042194	0.76478	159160	1	P29323-2;P29323-3;P29323	P29323-2;P29323-3;P29323	Ephrin type-B receptor 2	EPHB2
177190	0	0	0	0	0	1	1	1	0.9	0.9	0.9	170.59	0.030912	0.83894	177190	1	P07814	P07814	Bifunctional glutamate/proline--tRNA ligase;Glutamate--tRNA ligase;Proline--tRNA ligase	EPRS
0	0	0	816300	0	0	1	1	1	1.5	1.5	1.5	81.966	0.016736	1.2533	954270	1	Q8IUD2-5;Q8IUD2-4;Q8IUD2-2;Q8IUD2-3;Q8IUD2	Q8IUD2-5;Q8IUD2-4;Q8IUD2-2;Q8IUD2-3;Q8IUD2	ELKS/Rab6-interacting/CAST family member 1	ERC1
1785900	0	7335300	3760200	0	6654400	2	2	2	21.2	21.2	21.2	12.259	0	44.867	18966000	19	P84090	P84090	Enhancer of rudimentary homolog	ERH
0	0	81300	0	0	0	1	1	1	7.9	7.9	7.9	16.814	0.041152	0.75249	239690	2	O94905-2;O94905-3;O94905;O75477	O94905-2;O94905-3;O94905;O75477	Erlin-2;Erlin-1	ERLIN2;ERLIN1
0	0	0	0	657350	0	1	1	1	2.4	2.4	2.4	61.217	0	2.5559	526220	2	Q01844-2;Q01844-6;Q01844-3;Q01844;Q01844-5	Q01844-2;Q01844-6;Q01844-3;Q01844;Q01844-5	RNA-binding protein EWS	EWSR1
0	10841000	0	0	0	0	1	1	1	1.4	1.4	1.4	100.28	0.025773	0.94695	4536000	1	Q9NV70-2;Q9NV70	Q9NV70-2;Q9NV70	Exocyst complex component 1	EXOC1
0	0	0	0	0	2696500	2	2	2	13.3	13.3	13.3	15.164	0	4.5081	3053900	4	Q01469	Q01469	Fatty acid-binding protein, epidermal	FABP5
0	0	0	4168100	0	0	1	1	1	8.7	8.7	8.7	23.279	1	-2	1667200	1	Q13158	Q13158	FAS-associated death domain protein	FADD
248800	0	0	0	0	0	1	1	1	4	4	4	52.623	0.023173	0.98848	248800	1	Q96CS3	Q96CS3	FAS-associated factor 2	FAF2
149880	0	0	0	0	0	1	1	1	7.1	7.1	7.1	17.342	0.022346	1.0623	149880	1	Q96A26	Q96A26	Protein FAM162A	FAM162A
0	0	0	0	0	22428000	1	1	1	5.7	5.7	5.7	27.43	0.027732	0.89148	16972000	1	Q6ZUX3-3;Q6ZUX3-2;Q6ZUX3	Q6ZUX3-3;Q6ZUX3-2;Q6ZUX3	Protein FAM179A	FAM179A
100310	0	0	0	0	0	1	1	1	3.7	3.7	3.7	32.759	1	-2	100310	0	Q9NTI7	Q9NTI7	Protein FAM212B	FAM212B
0	0	267500	0	0	0	1	1	1	6.9	6.9	6.9	28.021	0.038627	0.77527	318080	1	Q7Z4H9	Q7Z4H9	Protein FAM220A	FAM220A
0	0	0	0	0	2260300	1	1	1	4.1	4.1	4.1	28.701	0.021818	1.015	1710500	1	Q17RN3-2;Q17RN3	Q17RN3-2;Q17RN3	Protein FAM98C	FAM98C
1558000	0	503410	0	0	0	6	6	6	13.6	13.6	13.6	54.157	0	19.566	2239800	15	Q9Y285-2;Q9Y285	Q9Y285-2;Q9Y285	Phenylalanine--tRNA ligase alpha subunit	FARSA
0	0	0	0	0	2158100	1	1	1	16.9	16.9	16.9	6.6478	0.00883	1.4309	8356300	6	P62861	P62861	40S ribosomal protein S30	FAU
0	0	0	0	289480	0	1	1	1	2.4	2.4	2.4	52.734	0.034024	0.80327	9658800	2	Q8NEE6-4;Q8NEE6-3;Q8NEE6-2;Q8NEE6	Q8NEE6-4;Q8NEE6-3;Q8NEE6-2;Q8NEE6	F-box/LRR-repeat protein 13	FBXL13
0	0	584340	0	0	0	2	2	2	5.1	5.1	5.1	69.756	0	13.797	694840	3	P02671-2;P02671	P02671-2;P02671	Fibrinogen alpha chain;Fibrinopeptide A;Fibrinogen alpha chain	FGA
0	0	707730	0	0	749210	5	5	5	13.8	13.8	13.8	55.928	0	5.626	1453900	8	P02675;CON__P02676	P02675	Fibrinogen beta chain;Fibrinopeptide B;Fibrinogen beta chain	FGB
0	0	2027900	0	0	1816500	6	6	6	23.6	23.6	23.6	49.496	0	11.85	4497700	17	P02679-2;P02679	P02679-2;P02679	Fibrinogen gamma chain	FGG
0	0	138320	0	0	0	1	1	1	6.2	6.2	6.2	22.017	0.01833	1.2144	164480	1	Q13642-3;Q13642-1;Q13642-5;Q13642-4;Q13642	Q13642-3;Q13642-1;Q13642-5;Q13642-4;Q13642	Four and a half LIM domains protein 1	FHL1
0	0	0	0	0	134040	1	1	1	3.1	3.1	3.1	38.95	0.027687	0.89104	196550	0	Q96AY3-2;Q96AY3	Q96AY3-2;Q96AY3	Peptidyl-prolyl cis-trans isomerase FKBP10	FKBP10
0	0	0	0	0	331970	1	1	1	0.2	0.2	0.2	435.16	0.022222	1.0469	417760	1	CON__P20930;P20930	CON__P20930;P20930	Filaggrin	FLG
458320	0	0	0	0	0	2	2	2	1	1	1	248.07	0	4.071	1575900	7	CON__Q5D862;Q5D862	CON__Q5D862;Q5D862	Filaggrin-2	FLG2
0	0	1798900	0	0	1900900	12	12	12	5.7	5.7	5.7	280.01	0	17.415	3825700	17	P21333-2;P21333	P21333-2;P21333	Filamin-A	FLNA
922150	0	0	0	0	0	1	1	1	0.8	0.8	0.8	287.28	0.027464	0.88568	922150	1	Q14315-2;Q14315	Q14315-2;Q14315	Filamin-C	FLNC
0	0	8085500	0	0	0	1	1	1	9.3	9.3	9.3	14.563	1	-2	9614600	1	Q96CP2	Q96CP2	FLYWCH family member 2	FLYWCH2
0	0	0	0	0	480670	1	1	1	1.9	1.9	1.9	122.11	0.040761	0.74804	720900	1	Q9P278;Q9P278-2	Q9P278;Q9P278-2	Folliculin-interacting protein 2	FNIP2
0	149750	0	0	0	0	1	1	1	1.5	1.5	1.5	80.211	1	-2	62661	0	Q5H8C1-2;Q5H8C1	Q5H8C1-2;Q5H8C1	FRAS1-related extracellular matrix protein 1	FREM1
0	0	0	0	0	106980	1	1	1	1.1	1.1	1.1	67.56	0.038793	0.77852	233360	1	Q96AE4;Q96AE4-2;Q92945	Q96AE4;Q96AE4-2;Q92945	Far upstream element-binding protein 1;Far upstream element-binding protein 2	FUBP1;KHSRP
0	0	0	0	0	552530	1	1	1	2.7	2.7	2.7	53.354	0	2.9717	1003600	2	P35637-2;P35637;Q92804-2;Q92804	P35637-2;P35637;Q92804-2;Q92804	RNA-binding protein FUS;TATA-binding protein-associated factor 2N	FUS;TAF15
0	0	100660	0	0	0	1	1	1	1.3	1.3	1.3	80.503	0.030817	0.83729	243690	0	Q7L622	Q7L622	G2/M phase-specific E3 ubiquitin-protein ligase	G2E3
0	0	0	0	0	4388300	1	1	1	1.9	1.9	1.9	48.764	0.012987	1.326	3320900	2	Q99999	Q99999	Galactosylceramide sulfotransferase	GAL3ST1
951640	0	2385700	0	0	3321400	5	5	5	18.5	18.5	18.5	36.053	0	13.231	6813300	11	P04406;P04406-2	P04406;P04406-2	Glyceraldehyde-3-phosphate dehydrogenase	GAPDH
0	0	0	439010	0	0	1	1	1	4.5	4.5	4.5	20.834	0.021898	1.031	381570	2	Q9NY12-2;Q9NY12	Q9NY12-2;Q9NY12	H/ACA ribonucleoprotein complex subunit 1	GAR1
0	0	47773	0	0	0	1	1	1	3.6	3.6	3.6	29.052	0.018182	1.2062	207770	1	O75323-2;O75323	O75323-2;O75323	Protein NipSnap homolog 2	GBAS
0	0	144910	0	0	0	1	1	1	2.7	2.7	2.7	52.917	0.029895	0.81934	172310	1	P02774;P02774-3	P02774;P02774-3	Vitamin D-binding protein	GC
315870	0	0	0	0	0	2	2	2	2.5	2.5	2.5	120.04	0.0026178	1.9251	315870	3	P57678	P57678	Gem-associated protein 4	GEMIN4
155060	0	0	0	0	0	1	1	1	5.5	5.5	5.5	30.522	0.036496	0.79342	155060	1	Q7L5D6-2;Q7L5D6	Q7L5D6-2;Q7L5D6	Golgi to ER traffic protein 4 homolog	GET4
66547	0	0	0	0	0	1	1	1	1.2	1.2	1.2	76.758	0.027419	0.88521	66547	1	Q06210-2;O94808;Q06210	Q06210-2;O94808;Q06210	Glutamine--fructose-6-phosphate aminotransferase [isomerizing] 1;Glutamine--fructose-6-phosphate aminotransferase [isomerizing] 2	GFPT1;GFPT2
0	0	37276	0	0	0	1	1	1	2.8	2.8	2.8	32.735	0.040928	0.74958	44325	0	Q9H3C7-2;Q9H3C7-3;Q9H3C7	Q9H3C7-2;Q9H3C7-3;Q9H3C7	Gametogenetin-binding protein 2	GGNBP2
0	0	82540	0	0	0	1	1	1	5.9	5.9	5.9	19.043	0.012959	1.3218	98149	2	Q04760-2;Q04760	Q04760-2;Q04760	Lactoylglutathione lyase	GLO1
0	0	176580	0	0	0	3	3	3	10.4	10.4	10.4	35.076	0	6.8343	653670	3	P63244	P63244	Guanine nucleotide-binding protein subunit beta-2-like 1;Guanine nucleotide-binding protein subunit beta-2-like 1, N-terminally processed	GNB2L1
0	0	0	0	0	0	1	1	1	1.7	1.7	1.7	71.644	0.021779	1.0136	0	2	H3BQL2;D6RF30;A6NMD2	H3BQL2;D6RF30;A6NMD2	Golgin subfamily A member 8K;Golgin subfamily A member 8J	GOLGA8T;GOLGA8K;GOLGA8J
0	0	0	0	0	2284600	1	1	1	4.6	4.6	4.6	44.272	0	4.5432	11300000	11	Q8NBJ4-2;Q8NBJ4	Q8NBJ4-2;Q8NBJ4	Golgi membrane protein 1	GOLM1
52420	0	0	0	0	0	1	1	1	2	2	2	47.145	0.040541	0.74222	52420	0	Q9H8Y8;Q9H8Y8-3	Q9H8Y8;Q9H8Y8-3	Golgi reassembly-stacking protein 2	GORASP2
0	0	0	0	0	0	1	1	1	1.8	1.8	1.8	49.364	0.017928	1.1704	0	2	Q96QA5	Q96QA5	Gasdermin-A	GSDMA
0	0	0	0	0	0	1	1	1	5.2	5.2	5.2	23.356	0.019455	1.1321	0	1	P09211	P09211	Glutathione S-transferase P	GSTP1
0	0	0	0	0	0	1	1	1	3.4	3.4	3.4	29.776	0.042384	0.73239	0	1	Q13889-2;Q13889	Q13889-2;Q13889	General transcription factor IIH subunit 3	GTF2H3
0	0	0	0	0	93164000	1	1	1	6.6	6.6	6.6	22.484	0.019417	1.131	158970000	3	O95843-2;O95843	O95843-2;O95843	Guanylyl cyclase-activating protein 3	GUCA1C
0	0	0	0	0	110900	1	1	1	7.3	7.3	7.3	19.167	0.026316	0.96814	243240	1	P07305-2;P07305	P07305-2;P07305	Histone H1.0;Histone H1.0, N-terminally processed	H1F0
796670	0	2390800	1320600	0	1880500	4	4	4	22.5	22.5	22.5	22.487	0	16.24	5759800	10	Q92522	Q92522	Histone H1x	H1FX
0	0	0	0	891800	0	1	1	1	5.2	5.2	5.2	15.214	0.0074074	1.7101	4515100	6	Q6NXT2;Q71DI3;Q16695;P84243;P68431	Q6NXT2;Q71DI3;Q16695;P84243;P68431	Histone H3.3C;Histone H3.2;Histone H3.1t;Histone H3.3;Histone H3.1	H3F3C;HIST2H3A;HIST3H3;H3F3A;HIST1H3A
1521500	0	0	0	0	0	3	3	3	13	13	13	43.159	0	24.756	1879100	5	Q9P035;Q9P035-2	Q9P035;Q9P035-2	Very-long-chain (3R)-3-hydroxyacyl-CoA dehydratase 3	HACD3
0	0	106970	0	0	0	1	1	1	1	1	1	82.999	0.026984	0.86785	127190	1	P40939	P40939	Trifunctional enzyme subunit alpha, mitochondrial;Long-chain enoyl-CoA hydratase;Long chain 3-hydroxyacyl-CoA dehydrogenase	HADHA
0	0	0	0	0	508760	2	2	2	8.2	8.2	8.2	26.099	0.0025773	1.8637	518680	2	O00165-5;O00165-3;O00165;O00165-2	O00165-5;O00165-3;O00165;O00165-2	HCLS1-associated protein X-1	HAX1
0	0	598770	0	0	452930	4	4	2	32.7	32.7	19.7	15.998	0	6.2445	1069800	5	P68871;P02042	P68871;P02042	Hemoglobin subunit beta;LVV-hemorphin-7;Spinorphin;Hemoglobin subunit delta	HBB;HBD
0	0	0	0	0	160460	1	1	1	2	2	2	60.76	0.042553	0.73523	351720	0	Q9UKV0-9;Q9UKV0-8;Q9UKV0-3;Q9UKV0-4;Q9UKV0-2;Q9UKV0;Q9UKV0-6;Q9UKV0-5;Q9UKV0-7	Q9UKV0-9;Q9UKV0-8;Q9UKV0-3;Q9UKV0-4;Q9UKV0-2;Q9UKV0;Q9UKV0-6;Q9UKV0-5;Q9UKV0-7	Histone deacetylase 9	HDAC9
0	0	0	0	0	150560	1	1	1	4.2	4.2	4.2	26.788	0.02623	0.89609	243600	2	P51858	P51858	Hepatoma-derived growth factor	HDGF
0	0	0	0	0	69175	1	1	1	1.6	1.6	1.6	70.224	0.026408	0.97136	150930	1	Q7Z353-2;Q7Z353	Q7Z353-2;Q7Z353	Highly divergent homeobox	HDX
142410	0	0	0	0	0	1	1	1	1.6	1.6	1.6	81.636	0.026604	0.85115	142410	1	Q9NRZ9-6;Q9NRZ9-5;Q9NRZ9-4;Q9NRZ9-3;Q9NRZ9-2;Q9NRZ9	Q9NRZ9-6;Q9NRZ9-5;Q9NRZ9-4;Q9NRZ9-3;Q9NRZ9-2;Q9NRZ9	Lymphoid-specific helicase	HELLS
272990	0	0	0	0	0	1	1	1	0.9	0.9	0.9	131.25	0.037572	0.78294	272990	0	Q9H422-2;Q9H422	Q9H422-2;Q9H422	Homeodomain-interacting protein kinase 3	HIPK3
12407000	36270000	51706000	20451000	20670000	47504000	8	8	8	27.7	27.7	27.7	21.364	0	36.864	135480000	46	P16403;P10412;P16402;P22492;Q02539;P16401	P16403;P10412;P16402	Histone H1.2;Histone H1.4;Histone H1.3	HIST1H1C;HIST1H1E;HIST1H1D
0	0	4397200	0	0	3065900	2	2	2	19	19	19	13.952	0	12.952	7320300	3	Q99880;Q99879;Q99877;Q93079;Q8N257;Q5QNW6;Q16778;P62807;P58876;P57053;P33778;P23527;P06899;O60814;Q5QNW6-2;Q96A08	Q99880;Q99879;Q99877;Q93079;Q8N257;Q5QNW6;Q16778;P62807;P58876;P57053;P33778;P23527;P06899;O60814;Q5QNW6-2;Q96A08	Histone H2B type 1-L;Histone H2B type 1-M;Histone H2B type 1-N;Histone H2B type 1-H;Histone H2B type 3-B;Histone H2B type 2-F;Histone H2B type 2-E;Histone H2B type 1-C/E/F/G/I;Histone H2B type 1-D;Histone H2B type F-S;Histone H2B type 1-B;Histone H2B type 1-O;Histone H2B type 1-J;Histone H2B type 1-K;Histone H2B type 1-A	HIST1H2BL;HIST1H2BM;HIST1H2BN;HIST1H2BH;HIST3H2BB;HIST2H2BF;HIST2H2BE;HIST1H2BC;HIST1H2BD;H2BFS;HIST1H2BB;HIST1H2BO;HIST1H2BJ;HIST1H2BK;HIST1H2BA
2794700	0	6970000	5291800	0	6610400	6	6	6	57.3	57.3	57.3	11.367	0	15.98	18257000	25	P62805	P62805	Histone H4	HIST1H4A
2570500	0	6169300	0	0	5464500	3	3	3	26.9	26.9	26.9	14.121	0	6.9624	15397000	15	Q7L7L0;P20671;P04908;Q93077;Q99878;Q96KK5;Q9BTM1;Q16777;Q6FI13;P0C0S8;P16104;Q96QV6;Q9BTM1-2;P0C0S5;Q71UI9;Q71UI9-2;Q71UI9-3;Q8IUE6;Q71UI9-4;Q71UI9-5	Q7L7L0;P20671;P04908;Q93077;Q99878;Q96KK5;Q9BTM1;Q16777;Q6FI13;P0C0S8;P16104;Q96QV6;Q9BTM1-2;P0C0S5;Q71UI9;Q71UI9-2	Histone H2A type 3;Histone H2A type 1-D;Histone H2A type 1-B/E;Histone H2A type 1-C;Histone H2A type 1-J;Histone H2A type 1-H;Histone H2A.J;Histone H2A type 2-C;Histone H2A type 2-A;Histone H2A type 1;Histone H2AX;Histone H2A type 1-A;Histone H2A.Z;Histone H2A.V	HIST3H2A;HIST1H2AD;HIST1H2AB;HIST1H2AC;HIST1H2AJ;HIST1H2AH;H2AFJ;HIST2H2AC;HIST2H2AA3;HIST1H2AG;H2AFX;HIST1H2AA;H2AFZ;H2AFV
0	0	0	0	0	303750	1	1	1	9.4	9.4	9.4	10.679	0.025084	0.91821	631350	2	P17096-2;P17096;P17096-3	P17096-2;P17096;P17096-3	High mobility group protein HMG-I/HMG-Y	HMGA1
0	0	0	0	0	907560	1	1	1	6.5	6.5	6.5	24.893	0.0089686	1.4524	1352000	2	P09429	P09429	High mobility group protein B1	HMGB1
0	0	0	0	0	724550	1	1	1	6.2	6.2	6.2	24.033	0.016632	1.2485	1193600	2	P26583	P26583	High mobility group protein B2	HMGB2
0	0	0	0	0	688930	2	2	2	24	24	24	10.659	0	2.1244	965780	2	P05114	P05114	Non-histone chromosomal protein HMG-14	HMGN1
0	0	0	0	0	235030	1	1	1	5.3	5.3	5.3	31.524	0.016842	1.2617	411720	1	P82970	P82970	High mobility group nucleosome-binding domain-containing protein 5	HMGN5
0	0	0	0	0	254920	1	1	1	9.3	9.3	9.3	11.023	0.016598	1.2466	537120	2	Q9UK76-3;Q9UK76;Q9UK76-2	Q9UK76-3;Q9UK76;Q9UK76-2	Hematological and neurological expressed 1 protein;Hematological and neurological expressed 1 protein, N-terminally processed	HN1
0	0	1819600	1001600	0	0	4	4	4	21.3	21.3	21.3	29.386	0	16.818	3381600	12	P09651-3;P09651-2;P09651;Q32P51	P09651-3;P09651-2;P09651;Q32P51	Heterogeneous nuclear ribonucleoprotein A1;Heterogeneous nuclear ribonucleoprotein A1, N-terminally processed;Heterogeneous nuclear ribonucleoprotein A1-like 2	HNRNPA1;HNRNPA1L2
0	0	801310	0	0	0	3	3	3	9.4	9.4	9.4	36.006	0	7.2359	1926400	4	P22626-2;P22626	P22626-2;P22626	Heterogeneous nuclear ribonucleoproteins A2/B1	HNRNPA2B1
0	0	0	0	0	322690	1	1	1	2.5	2.5	2.5	37.029	0.021033	1.0911	878030	2	P51991-2;P51991	P51991-2;P51991	Heterogeneous nuclear ribonucleoprotein A3	HNRNPA3
0	0	753440	0	0	0	2	2	2	9.5	9.5	9.5	30.588	0	5.2875	1236300	3	Q99729-3;Q99729-2;Q99729-4;Q99729	Q99729-3;Q99729-2;Q99729-4;Q99729	Heterogeneous nuclear ribonucleoprotein A/B	HNRNPAB
0	0	1319800	0	0	1420400	6	6	6	18.8	18.8	18.8	32.337	0	6.327	2648200	8	P07910-2;P07910;P07910-4;P0DMR1;O60812;B7ZW38;B2RXH8;P07910-3	P07910-2;P07910;P07910-4;P0DMR1;O60812;B7ZW38;B2RXH8;P07910-3	Heterogeneous nuclear ribonucleoproteins C1/C2;Heterogeneous nuclear ribonucleoprotein C-like 4;Heterogeneous nuclear ribonucleoprotein C-like 1;Heterogeneous nuclear ribonucleoprotein C-like 3;Heterogeneous nuclear ribonucleoprotein C-like 2	HNRNPC;HNRNPCL4;HNRNPCL1;HNRNPCL3;HNRNPCL2
0	0	0	0	0	299750	1	1	1	4.9	4.9	4.9	30.672	0	2.9906	595070	2	Q14103-4;Q14103-3;Q14103-2;Q14103	Q14103-4;Q14103-3;Q14103-2;Q14103	Heterogeneous nuclear ribonucleoprotein D0	HNRNPD
341240	0	0	0	0	0	3	1	1	10.4	3.9	3.9	45.671	0.0091324	1.4964	341240	2	P52597	P52597	Heterogeneous nuclear ribonucleoprotein F;Heterogeneous nuclear ribonucleoprotein F, N-terminally processed	HNRNPF
3848200	0	1625100	3562000	0	1720800	5	5	3	16.5	16.5	10.5	49.229	0	39.685	9076100	21	P31943;P55795	P31943;P55795	Heterogeneous nuclear ribonucleoprotein H;Heterogeneous nuclear ribonucleoprotein H, N-terminally processed;Heterogeneous nuclear ribonucleoprotein H2	HNRNPH1;HNRNPH2
2814900	0	4629000	5121000	3552400	4484900	11	11	11	33	33	33	48.562	0	29.38	16019000	46	P61978-3;P61978;P61978-2	P61978-3;P61978;P61978-2	Heterogeneous nuclear ribonucleoprotein K	HNRNPK
0	0	843720	0	0	1122000	2	2	2	4.8	4.8	4.8	64.132	0	2.7471	2575300	8	P14866;P14866-2	P14866;P14866-2	Heterogeneous nuclear ribonucleoprotein L	HNRNPL
1289700	0	0	843940	0	0	3	3	3	5.4	5.4	5.4	73.62	0	8.4948	2002900	10	P52272-2;P52272	P52272-2;P52272	Heterogeneous nuclear ribonucleoprotein M	HNRNPM
0	0	638340	0	0	630610	3	3	2	6.6	6.6	4.7	70.942	0	24.887	1443100	5	O43390;O43390-4;O43390-3;O43390-2	O43390;O43390-4;O43390-3;O43390-2	Heterogeneous nuclear ribonucleoprotein R	HNRNPR
3194200	0	3541800	4138800	0	3860200	10	10	10	12.5	12.5	12.5	88.979	0	86.65	13447000	32	Q00839-2;Q00839	Q00839-2;Q00839	Heterogeneous nuclear ribonucleoprotein U	HNRNPU
0	0	0	0	4389600	0	1	1	1	4	4	4	25.843	0.029985	0.82061	987640	1	Q86YM7-2;Q86YM7	Q86YM7-2;Q86YM7	Homer protein homolog 1	HOMER1
0	0	0	0	0	515210	1	1	1	4.7	4.7	4.7	39.467	0.04804	0.71238	440610	1	Q9NSB8-2;Q9NSB8	Q9NSB8-2;Q9NSB8	Homer protein homolog 2	HOMER2
0	0	0	0	0	1302600	1	1	1	1.9	1.9	1.9	80.021	0.030166	0.82582	2364600	1	Q9UJC3-2;Q9UJC3	Q9UJC3-2;Q9UJC3	Protein Hook homolog 1	HOOK1
0	0	32921000	0	0	35981000	8	8	8	27.8	27.8	27.8	45.205	0	38.391	70352000	24	P00738;P00738-2;P00739;P00739-2	P00738;P00738-2	Haptoglobin;Haptoglobin alpha chain;Haptoglobin beta chain	HP
0	0	0	0	0	0	1	1	1	5	5	5	24.579	0.027244	0.87708	0	2	P00492	P00492	Hypoxanthine-guanine phosphoribosyltransferase	HPRT1
0	0	2683100	0	0	2546900	3	3	3	11	11	11	51.676	0	11.534	6364600	7	P02790	P02790	Hemopexin	HPX
0	0	554390	0	0	0	1	1	1	0.7	0.7	0.7	282.39	0.016771	1.2586	659230	1	CON__Q86YZ3;Q86YZ3	CON__Q86YZ3;Q86YZ3	Hornerin	HRNR
356040	0	0	0	0	0	2	2	2	7.4	7.4	7.4	34.324	0	2.533	616730	4	Q53GQ0	Q53GQ0	Very-long-chain 3-oxoacyl-CoA reductase	HSD17B12
694290	0	0	0	1320800	1065600	10	5	5	15.3	7.5	7.5	84.659	0	20.834	2537200	12	P07900;P07900-2;Q14568;Q58FF6;Q58FG0	P07900;P07900-2	Heat shock protein HSP 90-alpha	HSP90AA1
10297000	0	6351600	1312300	5424200	4731800	13	13	7	21.8	21.8	12.3	83.263	0	150.18	23708000	39	P08238;Q58FF8;Q58FF7	P08238	Heat shock protein HSP 90-beta	HSP90AB1
314520	0	0	0	0	0	3	2	2	4.6	3.1	3.1	92.468	0	3.5043	566120	3	P14625	P14625	Endoplasmin	HSP90B1
166790000	9189700	13703000	3354800	2091200	3324100	21	20	11	38.7	36.7	19.3	70.051	0	323.31	208300000	119	P0DMV8;P0DMV9;P0DMV8-2	P0DMV8;P0DMV9;P0DMV8-2	Heat shock 70 kDa protein 1A;Heat shock 70 kDa protein 1B	HSPA1A;HSPA1B
137400	0	0	0	0	0	1	1	1	1.5	1.5	1.5	94.33	0.017578	1.1401	137400	1	P34932	P34932	Heat shock 70 kDa protein 4	HSPA4
183600	0	0	0	0	0	3	2	2	4.5	2.9	2.9	94.511	0	2.1789	183600	2	O95757	O95757	Heat shock 70 kDa protein 4L	HSPA4L
988180	0	1511300	0	0	1539100	7	6	6	14.1	11.6	11.6	72.332	0	37.979	4256900	19	P11021	P11021	78 kDa glucose-regulated protein	HSPA5
0	0	0	0	0	2246800	7	1	1	12.4	1.7	1.7	71.027	0	62.955	40955000	19	P17066;P48741	P17066;P48741	Heat shock 70 kDa protein 6;Putative heat shock 70 kDa protein 7	HSPA6;HSPA7
173950000	17523000	31765000	6314600	6514000	7750400	22	22	19	42.9	42.9	37	70.897	0	323.31	249680000	156	P11142;P11142-2;P54652	P11142;P11142-2	Heat shock cognate 71 kDa protein	HSPA8
2874900	0	4229200	0	0	3182300	15	15	15	30	30	30	73.68	0	72.403	10361000	28	P38646	P38646	Stress-70 protein, mitochondrial	HSPA9
0	0	1306100	0	0	1188100	6	6	6	9.2	9.2	9.2	61.054	0	8.2676	3059200	9	P10809	P10809	60 kDa heat shock protein, mitochondrial	HSPD1
0	0	732610	0	0	1366600	2	2	2	23.5	23.5	23.5	10.932	0	20.196	1905900	4	P61604	P61604	10 kDa heat shock protein, mitochondrial	HSPE1
1872600	0	0	0	0	0	6	6	5	8.8	8.8	7.1	92.115	0	32.237	1950100	7	Q92598-2;Q92598-3;Q92598;Q92598-4	Q92598-2;Q92598-3;Q92598;Q92598-4	Heat shock protein 105 kDa	HSPH1
0	0	0	0	0	12519000	1	1	1	1.1	1.1	1.1	123.08	0.006993	1.5423	9666100	1	Q4G0P3-2;Q4G0P3	Q4G0P3-2;Q4G0P3	Hydrocephalus-inducing protein homolog	HYDIN
184690	0	0	0	0	0	1	1	1	0.8	0.8	0.8	144.5	0.0025253	1.8303	184690	2	P41252	P41252	Isoleucine--tRNA ligase, cytoplasmic	IARS
841060	0	0	1343000	0	0	5	5	5	11.4	11.4	11.4	63.48	0	6.0546	1853600	8	Q9NZI8;Q9NZI8-2;O00425	Q9NZI8;Q9NZI8-2	Insulin-like growth factor 2 mRNA-binding protein 1	IGF2BP1
232900	0	0	0	0	0	1	1	1	2.5	2.5	2.5	37.654	0.018595	1.2445	232900	1	P01876	P01876	Ig alpha-1 chain C region	IGHA1
227300	0	0	0	0	0	2	1	1	4.7	3.1	3.1	49.328	0.027287	0.87872	227300	1	P0DOX5;P01857	P0DOX5;P01857	Ig gamma-1 chain C region	IGHG1
0	0	0	19254000	0	0	2	2	1	4.9	4.9	2.8	35.9	0	2.7694	31508000	6	P01859;P01861;P01860	P01859;P01861;P01860	Ig gamma-2 chain C region;Ig gamma-4 chain C region;Ig gamma-3 chain C region	IGHG2;IGHG4;IGHG3
0	0	0	0	0	456810	1	1	1	3.5	3.5	3.5	63.485	0	4.3097	4043300	17	P0DOX6;P01871;P01871-2	P0DOX6;P01871;P01871-2	Ig mu chain C region	IGHM
0	0	169780	0	0	0	1	1	1	7.5	7.5	7.5	23.379	0.0073529	1.6693	368840	2	P0DOX7;P01834	P0DOX7;P01834	Ig kappa chain C region	IGKC
796070000	117250000	133180000	1790400000	110610000	645850000	3	3	3	16.7	16.7	16.7	13.085	0	70.041	2238500000	370	A2NJV5;A0A0A0MRZ7;A0A075B6S2;A0A075B6S6;A0A075B6P5;A0A0C4DH68;A0A087WW87;P06310;P01615;P01614	A2NJV5;A0A0A0MRZ7;A0A075B6S2		IGKV A18;IGKV2D-26;IGKV2D-29
0	0	0	0	14414000	0	1	1	1	1	1	1	135.19	0	2.1086	5269800	3	O75054;O75054-2	O75054;O75054-2	Immunoglobulin superfamily member 3	IGSF3
0	0	499900	0	0	528510	2	2	2	6.4	6.4	6.4	43.062	0	4.1103	996790	3	Q12905	Q12905	Interleukin enhancer-binding factor 2	ILF2
0	0	379750	0	0	0	3	3	3	5.4	5.4	5.4	74.606	0	4.128	676630	4	Q12906-5;Q12906-4;Q12906-2;Q12906-6;Q12906-3;Q12906;Q12906-7	Q12906-5;Q12906-4;Q12906-2;Q12906-6;Q12906-3;Q12906;Q12906-7	Interleukin enhancer-binding factor 3	ILF3
13005000	0	8405100	0	0	1758300	18	18	18	32.3	32.3	32.3	82.624	0	81.186	24463000	35	Q16891-2;Q16891;Q16891-3;Q16891-4	Q16891-2;Q16891;Q16891-3;Q16891-4	MICOS complex subunit MIC60	IMMT
0	0	558890	0	0	0	3	3	3	7.6	7.6	7.6	55.804	0	4.8257	972940	4	P12268	P12268	Inosine-5-monophosphate dehydrogenase 2	IMPDH2
0	0	0	0	0	84772	1	1	1	0.7	0.7	0.7	176.75	0.042724	0.73736	720540	0	Q9ULG1	Q9ULG1	DNA helicase INO80	INO80
761680	0	0	0	0	0	3	3	3	3.7	3.7	3.7	116.98	0	3.5414	934820	4	O00410-2;O00410;O00410-3	O00410-2;O00410;O00410-3	Importin-5	IPO5
581840	0	0	0	0	0	3	3	3	3.1	3.1	3.1	119.52	0	3.5512	581840	3	O95373	O95373	Importin-7	IPO7
349540	0	0	0	0	0	2	2	2	3.6	3.6	3.6	115.96	0	2.5341	349540	2	Q96P70	Q96P70	Importin-9	IPO9
271710	0	0	0	0	0	1	1	1	2.6	2.6	2.6	53.032	0.021661	1.0055	271710	2	Q4KMZ1;Q4KMZ1-3	Q4KMZ1;Q4KMZ1-3	IQ domain-containing protein C	IQCC
1311400	0	0	0	0	0	3	3	3	4.4	4.4	4.4	133.77	0	3.2896	1481500	4	O14654	O14654	Insulin receptor substrate 4	IRS4
0	0	26735	0	0	0	1	1	1	2.8	2.8	2.8	39.768	1	-2	31791	0	Q96A47	Q96A47	Insulin gene enhancer protein ISL-2	ISL2
0	0	0	0	0	379190	1	1	1	2.3	2.3	2.3	101.39	0	25.669	815490	4	P19827	P19827	Inter-alpha-trypsin inhibitor heavy chain H1	ITIH1
0	0	147930	0	0	0	1	1	1	1.6	1.6	1.6	106.46	0	13.044	175900	2	P19823	P19823	Inter-alpha-trypsin inhibitor heavy chain H2	ITIH2
0	0	105890000	0	0	0	1	1	1	1.1	1.1	1.1	187.79	0.03655	0.79432	126620000	3	Q15811-4;Q15811-9;Q15811-8;Q15811	Q15811-4;Q15811-9;Q15811-8;Q15811	Intersectin-1	ITSN1
0	0	0	0	0	741050	1	1	1	1.5	1.5	1.5	135.14	0.037518	0.78127	1304900	1	Q9NZM3-4;Q9NZM3-3;Q9NZM3-2;Q9NZM3	Q9NZM3-4;Q9NZM3-3;Q9NZM3-2;Q9NZM3	Intersectin-2	ITSN2
254780	0	0	0	0	0	1	1	1	1	1	1	133.28	0.012903	1.3138	254780	2	P23458	P23458	Tyrosine-protein kinase JAK1	JAK1
0	0	906030	0	0	1565700	7	7	7	10.7	10.7	10.7	81.744	0	12.735	2283400	10	P14923	P14923	Junction plakoglobin	JUP
0	0	0	0	0	7586100	1	1	1	0.9	0.9	0.9	117.13	0.022472	1.0688	5804700	1	Q9ULD8	Q9ULD8	Potassium voltage-gated channel subfamily H member 3	KCNH3
2434600	0	0	6153100	0	0	6	5	5	25.3	21.9	21.9	33.276	0	6.8398	5310400	14	Q8N5Z5-2;Q8N5Z5	Q8N5Z5-2;Q8N5Z5	BTB/POZ domain-containing protein KCTD17	KCTD17
4935600	0	1136400	11953000	0	363630	6	6	5	36.9	36.9	33.1	28.527	0	34.265	11443000	21	Q14681	Q14681	BTB/POZ domain-containing protein KCTD2	KCTD2
15185000	0	9526100	31532000	0	0	4	3	3	21.8	17.5	17.5	26.092	0	84.05	39184000	16	Q9NXV2	Q9NXV2	BTB/POZ domain-containing protein KCTD5	KCTD5
0	0	0	0	0	488150	1	1	1	3.5	3.5	3.5	44.027	0.0089286	1.4474	1196500	1	Q07666-3;Q07666-2;Q07666	Q07666-3;Q07666-2;Q07666	KH domain-containing, RNA-binding, signal transduction-associated protein 1	KHDRBS1
0	0	0	0	0	1352100	1	1	1	0.7	0.7	0.7	161.89	0.042017	0.76373	2206200	1	Q9BVV6-2;Q9BVV6-4;Q9BVV6;Q9BVV6-3	Q9BVV6-2;Q9BVV6-4;Q9BVV6;Q9BVV6-3	Protein TALPID3	KIAA0586
143430000	0	10078000	226800000	0	11693000	38	38	38	38.5	38.5	38.5	119.16	0	323.31	264090000	179	P52732	P52732	Kinesin-like protein KIF11	KIF11
0	0	0	0	0	1709100	1	1	1	0.6	0.6	0.6	180.74	0.038571	0.77452	1293400	1	Q7Z4S6-6;Q7Z4S6-3;Q7Z4S6-5;Q7Z4S6-2;Q7Z4S6;Q7Z4S6-4	Q7Z4S6-6;Q7Z4S6-3;Q7Z4S6-5;Q7Z4S6-2;Q7Z4S6;Q7Z4S6-4	Kinesin-like protein KIF21A	KIF21A
0	0	0	0	0	5919500	2	2	2	1.3	1.3	1.3	179.75	0	2.6601	8604900	4	O75037-3;O75037-4;O75037-2;O75037	O75037-3;O75037-4;O75037-2;O75037	Kinesin-like protein KIF21B	KIF21B
0	0	0	0	0	1975100	1	1	1	2.3	2.3	2.3	63.276	0.0070423	1.5632	3908900	4	Q53G59;Q53G59-2	Q53G59;Q53G59-2	Kelch-like protein 12	KLHL12
0	0	0	0	0	6026000	1	1	1	2.2	2.2	2.2	69.774	0.0072993	1.6232	17411000	4	Q96M94	Q96M94	Kelch-like protein 15	KLHL15
0	0	0	0	75538000	0	1	1	1	0.7	0.7	0.7	122.64	0.046272	0.72059	16996000	1	Q76NI1-2;Q76NI1-4;Q76NI1-3;Q76NI1	Q76NI1-2;Q76NI1-4;Q76NI1-3;Q76NI1	Protein very KIND	KNDC1
363950	0	0	0	0	0	2	2	2	6.2	6.2	6.2	57.861	0.0073171	1.6316	363950	2	P52292	P52292	Importin subunit alpha-1	KPNA2
1567200	0	0	0	0	0	8	8	8	9.4	9.4	9.4	97.169	0	8.9138	2091400	11	Q14974;Q14974-2	Q14974;Q14974-2	Importin subunit beta-1	KPNB1
0	0	0	0	0	754760	1	1	1	1.6	1.6	1.6	64.135	0.0070093	1.5537	571180	1	Q5T749	Q5T749	Keratinocyte proline-rich protein	KPRP
251710000	343300000	454330000	286060000	353530000	371130000	37	37	23	53.9	53.9	40.5	66.038	0	323.31	1607500000	506	P04264;CON__P04264	P04264;CON__P04264	Keratin, type II cytoskeletal 1	KRT1
202160000	143700000	212100000	163840000	140900000	249550000	21	17	16	35.8	31.5	29.7	59.51	0	323.31	742840000	259	CON__P13645;P13645;CON__P02535-1;CON__Q148H6;CON__Q7Z3Y7;Q7Z3Y7;CON__Q7Z3Z0;CON__Q7Z3Y8;CON__Q2M2I5;Q7Z3Z0;Q7Z3Y8;Q2M2I5	CON__P13645;P13645	Keratin, type I cytoskeletal 10	KRT10
4328600	6290700	7147000	5381500	15981000	14729000	20	10	6	44.5	28.6	19.9	51.621	0	52.299	39469000	50	CON__P02533;P02533;CON__Q6IFX2;CON__A2A4G1;CON__P19012;P19012;P19012-2;CON__Q61782;CON__Q9D312;P35900;Q99456;CON__Q99456;CON__P35900;CON__P05784;CON__Q14532;CON__A2AB72;CON__REFSEQ:XP_986630;CON__Q497I4;CON__O76013;CON__Q7Z3Y9;CON__O76014;CON__Q15323;CON__Q8N1A0;CON__O76015;O76015;CON__Q14525;P05783;O76013;Q8N1A0-2;Q8N1A0;Q7Z3Y9;Q14525;CON__Q9UE12;Q15323;Q92764;O76013-2;Q14532;CON__A2A5Y0;CON__Q9…	CON__P02533;P02533;CON__Q6IFX2	Keratin, type I cytoskeletal 14	KRT14
33266000	38764000	41625000	35307000	141610000	199950000	22	21	11	49	49	30.9	51.267	0	238.31	316680000	115	CON__P08779;P08779;CON__Q9Z2K1;CON__Q3ZAW8	CON__P08779;P08779	Keratin, type I cytoskeletal 16	KRT16
0	0	722940	0	0	3715900	15	6	2	31	15.7	3.5	48.105	0	14.788	4171000	12	CON__Q04695;Q04695;CON__Q9C075;CON__Q99PS0;Q9C075	CON__Q04695;Q04695	Keratin, type I cytoskeletal 17	KRT17
53269000	45479000	69338000	48474000	69319000	88683000	33	30	22	54.8	51.6	39.1	65.432	0	323.31	281200000	186	CON__P35908v2;P35908;CON__P35908;CON__Q9R0H5;CON__REFSEQ:XP_932229	CON__P35908v2;P35908;CON__P35908	Keratin, type II cytoskeletal 2 epidermal	KRT2
867370	0	0	0	0	0	6	4	3	10.9	8.2	6.2	63.91	0	5.3814	867370	5	CON__P19013;P19013	CON__P19013;P19013	Keratin, type II cytoskeletal 4	KRT4
14224000	7340700	22887000	10854000	22611000	21877000	22	15	4	33.6	25.6	6.8	62.378	0	98.596	71116000	75	CON__P13647;P13647;CON__H-INV:HIT000016045;CON__P07744;CON__Q61726;CON__O43790;CON__Q6NT21;CON__P78385;CON__Q14533;CON__P78386;O43790;P78385;Q14533;P78386	CON__P13647;P13647	Keratin, type II cytoskeletal 5	KRT5
2260100	0	3400000	2895000	10044000	12136000	21	10	2	35.1	19.1	3.5	60.044	0	25.462	20379000	32	CON__P02538;P02538;CON__Q8VED5;CON__O95678;O95678;CON__H-INV:HIT000292931	CON__P02538;P02538	Keratin, type II cytoskeletal 6A	KRT6A
0	0	0	0	0	2121500	19	1	1	30.3	1.6	1.6	60.066	0	3.1535	1605500	1	P04259	P04259	Keratin, type II cytoskeletal 6B	KRT6B
0	0	0	0	0	1162600	20	1	0	33.3	1.8	0	60.024	0.024823	0.98052	1508200	3	P48668;CON__P48668;CON__P04259	P48668;CON__P48668;CON__P04259	Keratin, type II cytoskeletal 6C	KRT6C
0	0	0	100940	0	0	3	1	1	5.7	2.2	2.2	58.923	0	11.6	130700	1	CON__Q32MB2;Q86Y46-2;Q86Y46;CON__Q14CN4-1;CON__Q6IME9;CON__Q3SY84;CON__Q7RTS7;Q14CN4-3;Q14CN4-2;Q14CN4;Q3SY84;Q7RTS7	CON__Q32MB2;Q86Y46-2;Q86Y46;CON__Q14CN4-1;CON__Q6IME9;CON__Q3SY84;CON__Q7RTS7;Q14CN4-3;Q14CN4-2;Q14CN4;Q3SY84;Q7RTS7	Keratin, type II cytoskeletal 73;Keratin, type II cytoskeletal 72;Keratin, type II cytoskeletal 71;Keratin, type II cytoskeletal 74	KRT73;KRT72;KRT71;KRT74
0	0	9261300	0	0	40005000	10	7	6	17.3	12.8	10.7	61.802	0	72.517	86811000	25	CON__Q7Z794;Q7Z794	CON__Q7Z794;Q7Z794	Keratin, type II cytoskeletal 1b	KRT77
0	0	646520	0	0	789600	6	5	5	12.1	10.7	10.7	56.964	0	9.1501	1454900	6	CON__Q8N1N4-2;CON__Q7RTT2;Q8N1N4;Q8N1N4-2	CON__Q8N1N4-2;CON__Q7RTT2;Q8N1N4;Q8N1N4-2	Keratin, type II cytoskeletal 78	KRT78
0	0	0	0	0	745960	3	3	3	6.9	6.9	6.9	50.525	0	2.8458	564520	4	CON__Q6KB66-1;Q6KB66-2;Q6KB66;Q6KB66-3;CON__Q0VBK2	CON__Q6KB66-1;Q6KB66-2;Q6KB66;Q6KB66-3	Keratin, type II cytoskeletal 80	KRT80
4303900	0	0	0	0	0	2	2	2	1.8	1.8	1.8	56.682	0	3.1042	14562000	5	CON__Q9NSB4;Q9NSB4	CON__Q9NSB4;Q9NSB4	Keratin, type II cuticular Hb2	KRT82
65353000	245100000	321340000	135030000	71663000	110350000	30	30	29	56.2	56.2	56.2	62.064	0	323.31	789880000	249	P35527;CON__P35527	P35527;CON__P35527	Keratin, type I cytoskeletal 9	KRT9
72263000	0	0	0	0	0	1	1	1	6.5	6.5	6.5	34.634	0.03125	0.8101	72263000	1	Q16719-2;Q16719	Q16719-2;Q16719	Kynureninase	KYNU
1935300	0	0	0	0	0	2	2	2	0.9	0.9	0.9	343.9	0	2.1522	2026900	1	P24043	P24043	Laminin subunit alpha-2	LAMA2
0	0	0	0	0	107880	1	1	1	0.6	0.6	0.6	177.6	0.036443	0.79338	81642	1	P11047	P11047	Laminin subunit gamma-1	LAMC1
632630	0	0	0	0	0	3	3	3	6.5	6.5	6.5	70.702	0	3.0289	632630	3	Q14739	Q14739	Lamin-B receptor	LBR
0	0	0	0	0	129390	1	1	1	6.2	6.2	6.2	19.25	0.0087146	1.3514	279320	1	P31025	P31025	Lipocalin-1	LCN1
509480	0	0	0	0	0	2	2	2	10.8	10.8	10.8	36.638	0	2.4826	930720	3	P07195	P07195	L-lactate dehydrogenase B chain	LDHB
78142	0	0	0	0	0	1	1	1	1.6	1.6	1.6	83.353	0.009009	1.4638	78142	1	O95202	O95202	LETM1 and EF-hand domain-containing protein 1, mitochondrial	LETM1
0	0	0	0	0	147260	1	1	1	2.4	2.4	2.4	51.218	0.025126	0.91855	111440	1	Q9UHB6-3;Q9UHB6-2;Q9UHB6-5;Q9UHB6;Q9UHB6-4	Q9UHB6-3;Q9UHB6-2;Q9UHB6-5;Q9UHB6;Q9UHB6-4	LIM domain and actin-binding protein 1	LIMA1
0	0	0	0	0	81952	1	1	1	3.1	3.1	3.1	68.728	1	-2	1470400	1	P53667-4;P53667-2;P53667	P53667-4;P53667-2;P53667	LIM domain kinase 1	LIMK1
90009000	0	0	0	0	0	1	1	1	14.1	14.1	14.1	9.8161	0.024917	0.91389	90009000	2	Q96KT6	Q96KT6	Putative uncharacterized protein encoded by LINC00208	LINC00208
0	0	0	0	0	0	1	1	1	2	2	2	57.548	0.030303	0.82895	0	1	P49257	P49257	Protein ERGIC-53	LMAN1
0	0	0	0	0	105250	1	1	1	1.7	1.7	1.7	65.134	0.025381	0.92599	265760	2	P02545-2;P02545-6;P02545-3;P02545	P02545-2;P02545-6;P02545-3;P02545	Prelamin-A/C;Lamin-A/C	LMNA
0	0	1739200	0	0	0	3	3	3	2.2	2.2	2.2	157.9	0	2.9016	2158700	3	P42704	P42704	Leucine-rich PPR motif-containing protein, mitochondrial	LRPPRC
0	0	0	258620	0	0	1	1	1	3.3	3.3	3.3	34.93	0.024867	0.98272	558440	1	Q96AG4	Q96AG4	Leucine-rich repeat-containing protein 59	LRRC59
0	0	0	0	0	1578600	1	1	1	5	5	5	15.35	0.0091116	1.4807	2422500	2	Q9Y4Z0	Q9Y4Z0	U6 snRNA-associated Sm-like protein LSm4	LSM4
144520	0	0	0	0	0	1	1	1	2.8	2.8	2.8	51.466	0.045161	0.72095	236890	0	O95232	O95232	Luc7-like protein 3	LUC7L3
1087100	0	0	0	0	0	1	1	1	2.2	2.2	2.2	72.759	0.042913	0.72638	1087100	1	Q9BRK4	Q9BRK4	Leucine zipper putative tumor suppressor 2	LZTS2
228730	0	0	0	0	0	1	1	1	1.9	1.9	1.9	86.16	0	4.6308	228730	2	Q9Y5V3;Q9Y5V3-2	Q9Y5V3;Q9Y5V3-2	Melanoma-associated antigen D1	MAGED1
134010000	0	0	324600000	74623000	0	1	1	1	6.2	6.2	6.2	35.221	0.0087719	1.3714	389280000	28	Q9HAY2	Q9HAY2	Melanoma-associated antigen F1	MAGEF1
0	0	0	0	0	151910	1	1	1	0.8	0.8	0.8	122.29	0.038905	0.78041	114960	0	Q96JK9	Q96JK9	Mastermind-like protein 3	MAML3
0	0	0	0	23004000	0	1	1	1	2.2	2.2	2.2	44.632	0.018	1.1851	13330000	4	Q6ZN01	Q6ZN01	MEF2-activating motif and SAP domain-containing transcriptional regulator	MAMSTR
0	0	0	0	0	447210	1	1	1	1.1	1.1	1.1	100.34	0.026316	0.89763	838420	2	Q9P2G4	Q9P2G4	Microtubule-associated protein 10	MAP10
0	0	0	422420	0	0	1	1	1	2.9	2.9	2.9	50.151	0.0026247	1.9441	168960	1	Q13164-4;Q13164-3;Q13164-2;Q13164	Q13164-4;Q13164-3;Q13164-2;Q13164	Mitogen-activated protein kinase 7	MAPK7
0	0	0	0	0	680780	1	1	1	5.3	5.3	5.3	36.237	0.020873	1.0881	1269100	1	Q9BPZ7-5;Q9BPZ7-6;Q9BPZ7-3;Q9BPZ7-2;Q9BPZ7	Q9BPZ7-5;Q9BPZ7-6;Q9BPZ7-3;Q9BPZ7-2;Q9BPZ7	Target of rapamycin complex 2 subunit MAPKAP1	MAPKAP1
0	0	0	584580	0	0	1	1	1	12.5	12.5	12.5	19.099	0.04918	0.71171	233830	1	Q9P0N8-2;Q9P0N8	Q9P0N8-2;Q9P0N8	E3 ubiquitin-protein ligase MARCH2	MARCH2
0	0	1753400	0	0	0	5	5	5	26.2	26.2	26.2	31.554	0	23.305	2282500	8	P29966	P29966	Myristoylated alanine-rich C-kinase substrate	MARCKS
0	0	0	0	0	1331000	2	2	2	14.4	14.4	14.4	19.529	0	4.0041	1580000	4	P49006	P49006	MARCKS-related protein	MARCKSL1
168350	0	0	0	0	0	1	1	1	2	2	2	61.815	0.0025707	1.858	168350	1	P56192-2;P56192	P56192-2;P56192	Methionine--tRNA ligase, cytoplasmic	MARS
0	0	142750	0	0	0	1	1	1	5	5	5	32.964	0.002584	1.8902	169740	1	P31153-2;P31153	P31153-2;P31153	S-adenosylmethionine synthase isoform type-2	MAT2A
113790	0	0	0	0	0	1	1	1	2.5	2.5	2.5	62.575	0.018367	1.2162	113790	2	P43243-2;P43243	P43243-2;P43243	Matrin-3	MATR3
0	0	0	0	0	68031	1	1	1	7.3	7.3	7.3	17.202	1	-2	124080	0	P61244-2;P61244	P61244-2;P61244	Protein max	MAX
0	0	0	0	0	99756	1	1	1	2.4	2.4	2.4	43.254	1	-2	284710	0	Q9UBB5	Q9UBB5	Methyl-CpG-binding domain protein 2	MBD2
0	0	0	0	0	494920	1	1	1	1.3	1.3	1.3	89.417	0.042076	0.76408	374540	0	Q9P267-2;Q9P267	Q9P267-2;Q9P267	Methyl-CpG-binding domain protein 5	MBD5
0	370380	0	0	0	0	1	1	1	1.1	1.1	1.1	101.2	0.042857	0.72568	154980	0	Q96DN6	Q96DN6	Methyl-CpG-binding domain protein 6	MBD6
158230	0	0	0	0	0	1	1	1	3.1	3.1	3.1	36.6	0.038682	0.77674	158230	0	P33032	P33032	Melanocortin receptor 5	MC5R
1494800	0	0	0	0	0	8	8	8	13	13	13	90.98	0	13.223	1592400	9	P25205;P25205-2	P25205;P25205-2	DNA replication licensing factor MCM3	MCM3
172540	0	0	0	0	0	1	1	1	3.1	3.1	3.1	44.648	0	2.989	172540	1	P33993-2;P33993-3;P33993	P33993-2;P33993-3;P33993	DNA replication licensing factor MCM7	MCM7
0	0	0	0	0	75131	1	1	1	3.4	3.4	3.4	30.875	0.02627	0.96393	145510	2	P40926-2;P40926	P40926-2;P40926	Malate dehydrogenase, mitochondrial	MDH2
0	0	204080	0	0	0	1	1	1	9.2	9.2	9.2	16.516	0	7.4915	1048700	5	O14880	O14880	Microsomal glutathione S-transferase 3	MGST3
0	0	0	0	0	3639200	1	1	1	2.2	2.2	2.2	40.364	0.022099	1.0416	6607900	1	O75030-11;O75030-10;O75030-9;O75030-12;O75030-4;O75030-3;O75030-8;O75030-7;O75030-6;O75030-2;O75030-5;O75030	O75030-11;O75030-10;O75030-9;O75030-12;O75030-4;O75030-3;O75030-8;O75030-7;O75030-6;O75030-2;O75030-5;O75030	Microphthalmia-associated transcription factor	MITF
0	0	0	0	0	187220	1	1	1	4.9	4.9	4.9	31.148	0.031008	0.8408	597140	2	P51948-2;P51948	P51948-2;P51948	CDK-activating kinase assembly factor MAT1	MNAT1
0	0	0	0	0	675000	1	1	1	5.1	5.1	5.1	19.733	0.043025	0.72732	510820	1	P39210	P39210	Protein Mpv17	MPV17
0	0	0	0	0	302240	1	1	1	5.9	5.9	5.9	22.417	0.048162	0.7131	588920	1	Q9NV56	Q9NV56	MRG/MORF4L-binding protein	MRGBP
0	0	248090	0	0	297000	2	2	2	10.2	10.2	10.2	20.843	0.0072816	1.6203	520420	3	Q9Y2Q9	Q9Y2Q9	28S ribosomal protein S28, mitochondrial	MRPS28
0	0	0	0	0	95788	1	1	1	0.9	0.9	0.9	119.79	1	-2	72489	0	P52701-4;P52701-2;P52701-3;P52701	P52701-4;P52701-2;P52701-3;P52701	DNA mismatch repair protein Msh6	MSH6
0	0	351870	0	0	0	2	2	2	9.9	9.9	9.9	33.331	0	2.486	1065500	3	Q9Y6C9	Q9Y6C9	Mitochondrial carrier homolog 2	MTCH2
152490	0	0	0	0	0	1	1	1	7	7	7	25.565	0	2.9978	152490	1	P00403	P00403	Cytochrome c oxidase subunit 2	MT-CO2
0	0	23602000	0	0	0	1	1	1	20.5	20.5	20.5	5.1159	0.030675	0.83519	28065000	1	Q6P444-2;Q6P444	Q6P444-2;Q6P444	Mitochondrial fission regulator 2	MTFR2
111930	0	0	0	0	0	2	2	2	2.1	2.1	2.1	101.56	0	2.9123	264020	2	P11586	P11586	C-1-tetrahydrofolate synthase, cytoplasmic;Methylenetetrahydrofolate dehydrogenase;Methenyltetrahydrofolate cyclohydrolase;Formyltetrahydrofolate synthetase;C-1-tetrahydrofolate synthase, cytoplasmic, N-terminally processed	MTHFD1
0	0	1674400	0	0	1452700	2	2	2	2.3	2.3	2.3	99.35	0.0025575	1.8506	3477300	2	P55157;P55157-2	P55157;P55157-2	Microsomal triglyceride transfer protein large subunit	MTTP
0	0	336960	0	0	0	2	2	2	26.2	26.2	26.2	11.967	0.002681	2.0929	832870	4	Q99417	Q99417	C-Myc-binding protein	MYCBP
0	0	1068600	0	0	3001000	18	13	11	9.8	7.4	6.5	229	0	20.136	3486100	15	P35580;P35580-5;P35580-2;P35580-3;P35580-4	P35580;P35580-5;P35580-2;P35580-3;P35580-4	Myosin-10	MYH10
0	0	0	0	1299300	0	5	1	1	2.5	0.6	0.6	227.87	0.025424	0.92754	292330	1	Q7Z406;Q7Z406-6;Q7Z406-2;Q7Z406-5;Q7Z406-4	Q7Z406;Q7Z406-6;Q7Z406-2;Q7Z406-5;Q7Z406-4	Myosin-14	MYH14
0	0	6475200	0	9443600	22573000	41	41	32	24.7	24.7	19.7	226.53	0	303.61	28651000	83	P35579;P35579-2	P35579;P35579-2	Myosin-9	MYH9
0	0	0	0	0	1056900	2	2	2	17.2	17.2	17.2	16.93	0	4.5629	1206200	3	P60660;P60660-2;P14649	P60660;P60660-2;P14649	Myosin light polypeptide 6;Myosin light chain 6B	MYL6;MYL6B
0	0	0	0	0	343790	1	1	1	7.6	7.6	7.6	13.865	1	-2	436880	1	P24844-2;P19105;P24844;O14950	P24844-2;P19105;P24844;O14950	Myosin regulatory light polypeptide 9;Myosin regulatory light chain 12A;Myosin regulatory light chain 12B	MYL9;MYL12A;MYL12B
0	0	0	0	0	211160	1	1	1	1.9	1.9	1.9	54.392	0.040595	0.74405	159800	0	P28698-2;P28698	P28698-2;P28698	Myeloid zinc finger 1	MZF1
0	0	85338	0	0	0	1	1	1	2	2	2	55.52	0.019305	1.1104	254090	2	P43490	P43490	Nicotinamide phosphoribosyltransferase	NAMPT
572400	0	0	0	0	0	2	2	2	9	9	9	37.344	0.0026316	1.9916	572400	2	P55209-3;P55209-2;P55209	P55209-3;P55209-2;P55209	Nucleosome assembly protein 1-like 1	NAP1L1
0	0	356960	0	0	0	1	1	1	2	2	2	48.804	1	-2	424470	1	P49321-2;P49321-4;P49321;P49321-3	P49321-2;P49321-4;P49321;P49321-3	Nuclear autoantigenic sperm protein	NASP
0	0	0	0	0	248470	1	1	1	4	4	4	30.847	0.019231	1.1042	289510	1	Q6ZVX7	Q6ZVX7	F-box only protein 50	NCCRP1
3652400	0	11220000	1417800	0	10918000	12	12	12	16.9	16.9	16.9	76.613	0	33.637	26758000	30	P19338	P19338	Nucleolin	NCL
113780	0	0	0	0	0	1	1	1	12.5	12.5	12.5	11.399	0.021073	1.0943	113780	1	O95298-2;O95298	O95298-2;O95298	NADH dehydrogenase [ubiquinone] 1 subunit C2	NDUFC2
0	0	267490	0	0	0	3	2	2	3.5	2.5	2.5	102.47	0	2.5702	464250	2	P07197;P07197-2	P07197;P07197-2	Neurofilament medium polypeptide	NEFM
0	0	0	0	0	137100	1	1	1	2.9	2.9	2.9	40.659	1	-2	718740	0	Q15270	Q15270	NK1 transcription factor-related protein 1	NKX1-1
0	0	0	0	0	1147900	1	1	1	1	1	1	83.532	0.041551	0.7574	1896000	1	Q96P20-3;Q96P20-2;Q96P20-5;Q96P20-4;Q96P20-6;Q96P20	Q96P20-3;Q96P20-2;Q96P20-5;Q96P20-4;Q96P20-6;Q96P20	NACHT, LRR and PYD domains-containing protein 3	NLRP3
0	0	1291300	0	0	0	2	2	2	17.8	17.8	17.8	17.149	0.0025445	1.8445	1535500	1	P15531;P15531-2;P22392-2;O60361;P22392	P15531;P15531-2;P22392-2;O60361;P22392	Nucleoside diphosphate kinase A;Nucleoside diphosphate kinase B;Putative nucleoside diphosphate kinase	NME1;NME2;NME2P1
0	0	0	0	0	1136800	1	1	1	4.5	4.5	4.5	47.35	0.041322	0.75405	2311100	1	Q9HB89	Q9HB89	Neuromedin-U receptor 1	NMUR1
0	0	893970	0	0	863630	3	3	3	8.9	8.9	8.9	43.866	0	3.2117	1838200	6	Q15233-2;Q15233	Q15233-2;Q15233	Non-POU domain-containing octamer-binding protein	NONO
1060800	0	0	0	0	0	6	6	6	8.6	8.6	8.6	94.515	0	7.0525	1060800	6	P55786-2;P55786;A6NEC2;A6NEC2-3;A6NEC2-2	P55786-2;P55786;A6NEC2	Puromycin-sensitive aminopeptidase;Puromycin-sensitive aminopeptidase-like protein	NPEPPS;NPEPPSL1
3669400	0	7735900	0	0	7061700	6	6	6	23.5	23.5	23.5	32.575	0	17.77	20477000	16	P06748;P06748-2;P06748-3	P06748;P06748-2;P06748-3	Nucleophosmin	NPM1
475740	0	0	0	0	0	1	1	1	1.3	1.3	1.3	64.463	0.042272	0.73169	475740	1	P22736;P22736-2	P22736;P22736-2	Nuclear receptor subfamily 4 group A member 1	NR4A1
0	0	0	0	0	317310	1	1	1	2.6	2.6	2.6	52.163	0.041783	0.76149	607500	1	Q15406-3;Q15406-5;Q15406-2;Q15406-4;Q15406	Q15406-3;Q15406-5;Q15406-2;Q15406-4;Q15406	Nuclear receptor subfamily 6 group A member 1	NR6A1
92529	0	0	0	0	0	1	1	1	4.8	4.8	4.8	21.229	0.04096	0.76839	92529	1	P01111	P01111	GTPase NRas	NRAS
0	0	0	0	0	6483600	1	1	1	3.8	3.8	3.8	41.758	0.026362	0.96915	18145000	5	Q9Y2I2-2;Q9Y2I2-1;Q9Y2I2-5;Q9Y2I2-4;Q9Y2I2-6;Q9Y2I2	Q9Y2I2-2;Q9Y2I2-1;Q9Y2I2-5;Q9Y2I2-4;Q9Y2I2-6;Q9Y2I2	Netrin-G1	NTNG1
0	0	0	0	0	228150	1	1	1	5.9	5.9	5.9	22.775	0.0026882	2.1013	444880	3	Q9H1E3-2;Q9H1E3	Q9H1E3-2;Q9H1E3	Nuclear ubiquitous casein and cyclin-dependent kinase substrate 1	NUCKS1
0	0	0	0	13217000	0	1	1	1	1.2	1.2	1.2	109.28	0.0049628	1.7266	65959000	10	Q14980-5;Q14980-4;Q14980-3;Q14980-2;Q14980	Q14980-5;Q14980-4;Q14980-3;Q14980-2;Q14980	Nuclear mitotic apparatus protein 1	NUMA1
570540	0	0	0	0	0	3	3	3	6.6	6.6	6.6	48.534	0	4.0628	634090	4	P04181;P04181-2	P04181;P04181-2	Ornithine aminotransferase, mitochondrial;Ornithine aminotransferase, hepatic form;Ornithine aminotransferase, renal form	OAT
137560	0	0	0	0	0	1	1	1	2.4	2.4	2.4	37.773	0.040872	0.74904	137560	1	Q5SWX8-3;Q5SWX8-4;Q5SWX8-2;Q5SWX8	Q5SWX8-3;Q5SWX8-4;Q5SWX8-2;Q5SWX8	Protein odr-4 homolog	ODR4
0	0	0	0	0	628970	1	1	1	5.4	5.4	5.4	42.925	0.027778	0.89153	1056300	1	O75665-2;O75665-3;O75665	O75665-2;O75665-3;O75665	Oral-facial-digital syndrome 1 protein	OFD1
0	0	0	1813800	0	0	1	1	1	4.2	4.2	4.2	36.672	0.025042	0.9168	725510	1	O60890-2;O60890	O60890-2;O60890	Oligophrenin-1	OPHN1
0	0	2248300	0	0	2239000	3	3	1	21.9	21.9	13.4	23.511	0	5.0028	4657600	16	P02763	P02763	Alpha-1-acid glycoprotein 1	ORM1
0	0	0	0	0	886340	3	1	1	21.9	13.4	13.4	23.602	0	2.2391	774020	2	P19652	P19652	Alpha-1-acid glycoprotein 2	ORM2
1898500	0	2624700	2156600	0	1797900	8	8	5	16.6	16.6	9.9	61.18	0	36.414	7930800	22	P11940-2;P11940;Q9H361;Q4VXU2;Q4VXU2-2;Q96DU9-2;Q96DU9	P11940-2;P11940;Q9H361	Polyadenylate-binding protein 1;Polyadenylate-binding protein 3	PABPC1;PABPC3
0	0	129000	0	0	0	4	1	1	7.4	1.6	1.6	69.578	0.025818	0.95058	153390	1	Q13310-2;Q13310;Q13310-3;P0CB38	Q13310-2;Q13310;Q13310-3	Polyadenylate-binding protein 4	PABPC4
0	0	0	0	0	0	1	1	1	2.4	2.4	2.4	47.079	0.0068966	1.5175	0	1	P22234;P22234-2	P22234;P22234-2	Multifunctional protein ADE2;Phosphoribosylaminoimidazole-succinocarboxamide synthase;Phosphoribosylaminoimidazole carboxylase	PAICS
0	0	0	0	0	143890	1	1	1	3.7	3.7	3.7	19.891	0.049242	0.71175	203990	2	Q99497	Q99497	Protein deglycase DJ-1	PARK7
0	0	378160	0	0	0	3	3	3	3.5	3.5	3.5	113.08	0	14.261	766350	5	P09874	P09874	Poly [ADP-ribose] polymerase 1	PARP1
0	0	0	0	0	115020	1	1	1	6.3	6.3	6.3	33.496	0	4.2089	230590	1	Q15366-7;Q15366-8;Q15366-4;Q15366-5;P57721-2;P57721-3;P57721-5;Q15365;Q15366-6;Q15366-3;Q15366;Q15366-2;P57721-4;P57721	Q15366-7;Q15366-8;Q15366-4;Q15366-5;P57721-2;P57721-3;P57721-5;Q15365;Q15366-6;Q15366-3;Q15366;Q15366-2;P57721-4;P57721	Poly(rC)-binding protein 2;Poly(rC)-binding protein 3;Poly(rC)-binding protein 1	PCBP2;PCBP3;PCBP1
526020	0	0	0	0	0	1	1	1	5	5	5	28.768	0	35.109	526020	1	P12004	P12004	Proliferating cell nuclear antigen	PCNA
0	0	559950	0	0	699220	2	2	2	11.6	11.6	11.6	20.63	0	2.436	1194200	2	Q13442	Q13442	28 kDa heat- and acid-stable phosphoprotein	PDAP1
221910	0	0	0	0	0	1	1	1	4.7	4.7	4.7	37.514	0	2.7264	221910	2	P11177-3;P11177-2;P11177	P11177-3;P11177-2;P11177	Pyruvate dehydrogenase E1 component subunit beta, mitochondrial	PDHB
0	0	324280	0	0	0	2	2	2	4.2	4.2	4.2	72.932	0	3.2713	502290	2	P13667	P13667	Protein disulfide-isomerase A4	PDIA4
0	0	0	0	0	687440	1	1	1	1	1	1	193.1	0.030628	0.83498	891620	1	Q9H792	Q9H792	Pseudopodium-enriched atypical kinase 1	PEAK1
61717	0	0	0	0	0	1	1	1	1	1	1	110.67	1	-2	61717	0	Q5VY43	Q5VY43	Platelet endothelial aggregation receptor 1	PEAR1
0	0	523620	0	0	0	2	2	2	11.8	11.8	11.8	21.057	0	8.2253	870470	3	P30086	P30086	Phosphatidylethanolamine-binding protein 1;Hippocampal cholinergic neurostimulating peptide	PEBP1
0	0	253340	0	0	0	2	2	2	13.6	13.6	13.6	16.648	0	2.5381	529990	3	Q9UHV9	Q9UHV9	Prefoldin subunit 2	PFDN2
853480	0	552610	0	0	623270	5	5	5	11	11	11	54.406	0	7.7983	2098600	13	O60825-2;O60825;P16118-2;P16118	O60825-2;O60825	6-phosphofructo-2-kinase/fructose-2,6-bisphosphatase 2;6-phosphofructo-2-kinase;Fructose-2,6-bisphosphatase	PFKFB2
0	0	270170	0	0	277060	2	2	2	5.6	5.6	5.6	57.287	0.0026738	2.0892	738120	3	Q16875-3;Q16875-2;Q16875;Q16875-4	Q16875-3;Q16875-2;Q16875;Q16875-4	6-phosphofructo-2-kinase/fructose-2,6-bisphosphatase 3;6-phosphofructo-2-kinase;Fructose-2,6-bisphosphatase	PFKFB3
0	0	0	0	0	129400	1	1	1	3.9	3.9	3.9	28.02	0.026814	0.86271	280980	1	Q96HS1-2;Q96HS1	Q96HS1-2;Q96HS1	Serine/threonine-protein phosphatase PGAM5, mitochondrial	PGAM5
668870	0	0	0	0	0	2	2	2	17.4	17.4	17.4	21.671	0	2.5304	668870	3	O00264;O00264-2	O00264;O00264-2	Membrane-associated progesterone receptor component 1	PGRMC1
803340	0	0	0	0	0	2	2	2	8.1	8.1	8.1	29.804	0	7.3146	898660	2	P35232;P35232-2	P35232;P35232-2	Prohibitin	PHB
1143200	0	1195200	0	0	778890	5	5	5	19.4	19.4	19.4	33.296	0	7.4696	3249200	8	Q99623;Q99623-2	Q99623;Q99623-2	Prohibitin-2	PHB2
0	0	0	0	0	300250	1	1	1	1.6	1.6	1.6	70.209	0.040706	0.74734	317530	1	Q96BD5-2;Q96BD5;Q96BD5-3	Q96BD5-2;Q96BD5;Q96BD5-3	PHD finger protein 21A	PHF21A
0	0	0	0	0	191550	1	1	1	6.4	6.4	6.4	12.405	0.036337	0.79262	332790	1	Q7RTV0	Q7RTV0	PHD finger-like domain-containing protein 5A	PHF5A
2942300	0	1803500	1520400	0	1206000	7	7	7	14.8	14.8	14.8	56.65	0	11.796	6910000	14	O43175	O43175	D-3-phosphoglycerate dehydrogenase	PHGDH
0	0	299930	0	0	0	1	1	1	3.9	3.9	3.9	31.641	0.036711	0.79839	356650	1	Q6NSJ2-2;Q6NSJ2	Q6NSJ2-2;Q6NSJ2	Pleckstrin homology-like domain family B member 3	PHLDB3
0	0	0	0	0	248150000	1	1	1	0.3	0.3	0.3	446.7	0.0091743	1.5056	187790000	1	P08F94	P08F94	Fibrocystin	PKHD1
820640	0	3044300	0	0	1710700	10	10	10	24.9	24.9	24.9	57.936	0	33.653	5816700	16	P14618;P14618-3;P14618-2;P30613-2;P30613	P14618;P14618-3;P14618-2	Pyruvate kinase PKM	PKM
0	0	0	0	0	410350	1	1	1	2.1	2.1	2.1	80.496	0.0072464	1.6022	491530	1	Q13835-2;Q13835	Q13835-2;Q13835	Plakophilin-1	PKP1
0	0	0	0	0	65347	1	1	1	1.5	1.5	1.5	65.632	0.025597	0.93513	163480	2	P13797-3;P13797-2;P13797	P13797-3;P13797-2;P13797	Plastin-3	PLS3
0	0	514090	0	0	0	1	1	1	1.1	1.1	1.1	195.56	0.020794	1.0798	611300	1	Q9Y4D7-2;Q9Y4D7	Q9Y4D7-2;Q9Y4D7	Plexin-D1	PLXND1
0	0	0	0	0	153490	1	1	1	1.7	1.7	1.7	68.064	0.0069606	1.538	212880	1	Q8WVV4;Q8WVV4-1	Q8WVV4;Q8WVV4-1	Protein POF1B	POF1B
0	0	5479800	0	0	0	1	1	1	0.7	0.7	0.7	138.62	0.035294	0.79858	6516100	1	O00411	O00411	DNA-directed RNA polymerase, mitochondrial	POLRMT
0	0	134790	0	0	0	1	1	1	6	6	6	23.742	0.028081	0.84784	160290	1	P23284	P23284	Peptidyl-prolyl cis-trans isomerase B	PPIB
5747100	0	5374800	12570000	2813900	6511900	9	9	9	24.6	24.6	24.6	52.642	0	74.336	27563000	51	O75688;O75688-4;O75688-2;O75688-5;O75688-3;P35813-2;P35813;P35813-3	O75688;O75688-4;O75688-2;O75688-5	Protein phosphatase 1B	PPM1B
255530	0	0	0	0	0	1	1	1	1.7	1.7	1.7	65.308	0.018145	1.2053	255530	1	P30153	P30153	Serine/threonine-protein phosphatase 2A 65 kDa regulatory subunit A alpha isoform	PPP2R1A
115850	0	0	0	0	0	1	1	1	1.2	1.2	1.2	96.723	0.02551	0.93112	115850	1	Q9UPN7	Q9UPN7	Serine/threonine-protein phosphatase 6 regulatory subunit 1	PPP6R1
2634900	8777300	10512000	7173000	7857900	10754000	10	10	9	46.2	46.2	40.7	22.11	0	30.754	36195000	36	Q06830;Q13162	Q06830	Peroxiredoxin-1	PRDX1
0	0	1401300	0	0	1389500	5	4	4	27.8	22.2	22.2	21.892	0	4.9427	2931300	4	P32119;P32119-2	P32119	Peroxiredoxin-2	PRDX2
0	0	212430	0	0	0	2	2	2	10.9	10.9	10.9	25.838	0	6.9128	391460	2	P30048-2;P30048	P30048-2;P30048	Thioredoxin-dependent peroxide reductase, mitochondrial	PRDX3
0	0	700550	0	0	0	2	2	2	10.3	10.3	10.3	25.035	0	3.1905	1554600	4	P30041	P30041	Peroxiredoxin-6	PRDX6
0	0	0	0	0	403190	1	1	1	1.2	1.2	1.2	112.09	0.0069444	1.5338	405230	1	Q70Z35-3;Q70Z35-4;Q70Z35-2;Q70Z35	Q70Z35-3;Q70Z35-4;Q70Z35-2;Q70Z35	Phosphatidylinositol 3,4,5-trisphosphate-dependent Rac exchanger 2 protein	PREX2
0	0	1867600	0	0	0	3	3	3	33.1	33.1	33.1	17.016	0	3.6828	2510000	6	P02810	P02810	Salivary acidic proline-rich phosphoprotein 1/2;Salivary acidic proline-rich phosphoprotein 1/2;Salivary acidic proline-rich phosphoprotein 3/4;Peptide P-C	PRH1
9030300	0	400510	237900	0	1219400	30	30	30	8.9	8.9	8.9	469.08	0	49.03	12996000	34	P78527;P78527-2	P78527;P78527-2	DNA-dependent protein kinase catalytic subunit	PRKDC
107130	0	0	0	0	0	1	1	1	3.2	3.2	3.2	32.693	0.026178	0.96372	107130	1	Q99873-5;Q99873-2;Q99873-3;Q99873	Q99873-5;Q99873-2;Q99873-3;Q99873	Protein arginine N-methyltransferase 1	PRMT1
54194000	36981000	44842000	114380000	62956000	70743000	16	16	16	25.9	25.9	25.9	72.683	0	208.3	264440000	143	O14744;O14744-5;O14744-2;O14744-3;O14744-4	O14744;O14744-5;O14744-2;O14744-3;O14744-4	Protein arginine N-methyltransferase 5;Protein arginine N-methyltransferase 5, N-terminally processed	PRMT5
0	0	0	0	0	598620	3	3	3	6.1	6.1	6.1	54.909	0	3.3755	1247400	3	Q8WWY3-4;Q8WWY3;Q8WWY3-2;Q8WWY3-3	Q8WWY3-4;Q8WWY3;Q8WWY3-2	U4/U6 small nuclear ribonucleoprotein Prp31	PRPF31
0	0	0	0	0	242790	1	1	1	1.3	1.3	1.3	97.849	0.036284	0.78986	183730	0	Q6NWY9-2;Q6NWY9-3;Q6NWY9	Q6NWY9-2;Q6NWY9-3;Q6NWY9	Pre-mRNA-processing factor 40 homolog B	PRPF40B
0	0	100780	0	0	0	1	1	1	3.2	3.2	3.2	27.526	1	-2	119840	1	P60891-2;P60891;P11908;P11908-2	P60891-2;P60891;P11908;P11908-2	Ribose-phosphate pyrophosphokinase 1;Ribose-phosphate pyrophosphokinase 2	PRPS1;PRPS2
0	0	0	0	0	2189600	1	1	1	4	4	4	26.558	0	3.5395	3818700	4	CON__P07477;P07477	CON__P07477;P07477	Trypsin-1;Alpha-trypsin chain 1;Alpha-trypsin chain 2	PRSS1
0	0	0	0	0	151630	1	1	1	5.4	5.4	5.4	25.924	0	26.441	2850400	3	P35030-5;P35030-3;P35030-2;P35030-4;P35030	P35030-5;P35030-3;P35030-2;P35030-4;P35030	Trypsin-3	PRSS3
2317300	0	7528100	0	0	7562800	5	5	5	16.1	16.1	16.1	29.483	0	10.197	19046000	16	P25789;P25789-2	P25789;P25789-2	Proteasome subunit alpha type-4	PSMA4
0	0	346620	0	0	0	3	3	3	11.3	11.3	11.3	27.887	0	3.0176	481510	3	O14818;O14818-2;O14818-4;Q8TAA3-2;Q8TAA3-5;Q8TAA3	O14818;O14818-2	Proteasome subunit alpha type-7	PSMA7
0	0	0	0	0	78124	1	1	1	2.8	2.8	2.8	44.784	0.0050251	1.803	200540	2	P62195-2;P62195	P62195-2;P62195	26S protease regulatory subunit 8	PSMC5
0	0	597640	0	0	330260	5	5	5	13.7	13.7	13.7	47.463	0	4.8627	1008800	6	O00231;O00231-2	O00231;O00231-2	26S proteasome non-ATPase regulatory subunit 11	PSMD11
0	0	0	0	0	0	1	1	1	2.3	2.3	2.3	50.578	1	-2	0	1	O00232-2;O00232	O00232-2;O00232	26S proteasome non-ATPase regulatory subunit 12	PSMD12
160610	0	0	0	0	0	1	1	1	1.6	1.6	1.6	82.193	0.0069284	1.531	160610	2	Q13200-2;Q13200-3;Q13200	Q13200-2;Q13200-3;Q13200	26S proteasome non-ATPase regulatory subunit 2	PSMD2
0	0	303320	0	0	321680	4	4	4	7.7	7.7	7.7	60.977	0	4.1959	627510	6	O43242;O43242-2	O43242;O43242-2	26S proteasome non-ATPase regulatory subunit 3	PSMD3
0	0	0	0	0	250760	1	1	1	3.1	3.1	3.1	37.025	0.018293	1.2142	640200	2	P51665	P51665	26S proteasome non-ATPase regulatory subunit 7	PSMD7
0	0	152210	0	0	0	1	1	1	4.6	4.6	4.6	39.611	0.007177	1.5965	181000	1	P48556	P48556	26S proteasome non-ATPase regulatory subunit 8	PSMD8
0	0	208930	0	0	0	2	2	2	3.6	3.6	3.6	57.221	0	2.4093	348680	2	P26599;P26599-2;P26599-3	P26599;P26599-2;P26599-3	Polypyrimidine tract-binding protein 1	PTBP1
0	0	2564400	0	0	6423500	4	4	4	34.5	34.5	34.5	12.074	0	53.535	10101000	13	P06454-2;P06454	P06454-2;P06454	Prothymosin alpha;Prothymosin alpha, N-terminally processed;Thymosin alpha-1	PTMA
0	0	0	0	0	3072400	1	1	1	1.3	1.3	1.3	131.13	0.030864	0.8386	5700700	1	P08575-4;P08575-9;P08575-10;P08575-8;P08575-7;P08575-5;P08575-6;P08575	P08575-4;P08575-9;P08575-10;P08575-8;P08575-7;P08575-5;P08575-6;P08575	Receptor-type tyrosine-protein phosphatase C	PTPRC
0	0	0	0	0	262060	1	1	1	2.4	2.4	2.4	43.76	0.03639	0.79338	198320	1	Q16827-4;Q16827-3;Q16827-2;Q16827;P23467-4;P23467-2;P23467;P23467-3	Q16827-4;Q16827-3;Q16827-2;Q16827;P23467-4;P23467-2;P23467;P23467-3	Receptor-type tyrosine-protein phosphatase O;Receptor-type tyrosine-protein phosphatase beta	PTPRO;PTPRB
0	0	667190	0	0	0	3	3	3	23.4	23.4	23.4	16.386	0	28.122	1519400	5	Q03393	Q03393	6-pyruvoyl tetrahydrobiopterin synthase	PTS
0	999150	0	0	0	0	1	1	1	3.3	3.3	3.3	46.603	0.046332	0.72073	418070	1	P49023-4;P49023-2;P49023;P49023-3	P49023-4;P49023-2;P49023;P49023-3	Paxillin	PXN
0	0	0	0	0	1496700	1	1	1	2	2	2	86.578	0.043081	0.72881	2429800	1	P47897-2;P47897	P47897-2;P47897	Glutamine--tRNA ligase	QARS
0	0	245720	0	0	0	1	1	1	4.5	4.5	4.5	35.421	0	7.5309	292180	1	Q16769-2;Q16769	Q16769-2;Q16769	Glutaminyl-peptide cyclotransferase	QPCT
111700	0	0	0	0	0	1	1	1	5.5	5.5	5.5	22.541	0.041667	0.76053	111700	1	P61026	P61026	Ras-related protein Rab-10	RAB10
782690	0	0	0	0	0	1	1	1	11.3	11.3	11.3	15.33	0.026941	0.86628	782690	1	P62820-2;Q9H0U4;Q92928;P62820	P62820-2;Q9H0U4;Q92928;P62820	Ras-related protein Rab-1A;Ras-related protein Rab-1B;Putative Ras-related protein Rab-1C	RAB1A;RAB1B;RAB1C
133130	0	0	0	0	0	1	1	1	7.6	7.6	7.6	24.347	0.043137	0.72944	133130	1	Q9UL25	Q9UL25	Ras-related protein Rab-21	RAB21
274670	0	0	0	0	0	1	1	1	6.3	6.3	6.3	19.09	0	3.8789	274670	1	P61020-2;P20339-2;P61020;P20339;P51148;P51148-2	P61020-2;P20339-2;P61020;P20339;P51148;P51148-2	Ras-related protein Rab-5B;Ras-related protein Rab-5A;Ras-related protein Rab-5C	RAB5B;RAB5A;RAB5C
0	0	0	215470	0	0	1	1	1	6.3	6.3	6.3	19.934	0.017787	1.1497	930380	1	P20340-4;Q9NRW1-2;Q9NRW1;P20340-2;P20340;Q14964	P20340-4;Q9NRW1-2;Q9NRW1;P20340-2;P20340;Q14964	Ras-related protein Rab-6A;Ras-related protein Rab-6B;Ras-related protein Rab-39A	RAB6A;RAB6B;RAB39A
325730	0	0	0	0	0	2	2	2	11.6	11.6	11.6	23.489	0	13.682	325730	3	P51149	P51149	Ras-related protein Rab-7a	RAB7A
648580	0	0	0	0	0	3	3	3	19.4	19.4	19.4	22.837	0	3.2476	648580	3	P51151;Q9NP90	P51151	Ras-related protein Rab-9A	RAB9A
0	0	0	0	1194800	0	4	4	4	18.5	18.5	18.5	24.423	0	4.9824	3326700	9	P62826	P62826	GTP-binding nuclear protein Ran	RAN
0	0	151020	0	0	0	1	1	1	5.5	5.5	5.5	23.239	0.0087336	1.352	179580	1	P43487-2;P43487	P43487-2;P43487	Ran-specific GTPase-activating protein	RANBP1
0	0	0	0	0	2683300	1	1	1	1.4	1.4	1.4	124.71	1	-2	4280400	1	O60518	O60518	Ran-binding protein 6	RANBP6
0	0	0	0	0	137220	1	1	1	8	8	8	15.356	0.023256	0.99319	487130	2	P61224-2;P61224-4;P61224-3;P62834;P61224	P61224-2;P61224-4;P61224-3;P62834;P61224	Ras-related protein Rap-1b;Ras-related protein Rap-1A	RAP1B;RAP1A
0	0	71593	0	0	0	1	1	1	2.4	2.4	2.4	47.82	0.049057	0.71155	85132	1	Q16576	Q16576	Histone-binding protein RBBP7	RBBP7
0	0	0	0	0	449310	1	1	1	8	8	8	30.36	0.038244	0.77025	1189500	1	Q9H477-2;Q9H477	Q9H477-2;Q9H477	Ribokinase	RBKS
2256300	0	1523100	3071400	0	2102100	9	9	9	12.3	12.3	12.3	103.43	0	12.094	6658800	20	P98175-2;P98175;P98175-5;P98175-4;P98175-3	P98175-2;P98175;P98175-5;P98175-4;P98175-3	RNA-binding protein 10	RBM10
568090	0	0	0	0	0	3	3	3	8.1	8.1	8.1	57.089	0	11.036	568090	4	Q14498-3;Q14498-2;Q14498;Q86U06-4;Q86U06-5;Q86U06-2;Q86U06	Q14498-3;Q14498-2;Q14498	RNA-binding protein 39	RBM39
754030	0	5297500	3175900	2869300	5486900	11	11	11	30.4	30.4	30.4	42.331	0	43.048	15424000	32	P38159;P38159-2;Q96E39;P38159-3;O75526;Q8IZ40;Q8N7X1	P38159;P38159-2;Q96E39	RNA-binding motif protein, X chromosome;RNA-binding motif protein, X chromosome, N-terminally processed;RNA binding motif protein, X-linked-like-1	RBMX;RBMXL1
0	0	686890	0	0	550240	3	3	3	34.8	34.8	34.8	23.01	0	7.1673	1263400	6	P02753	P02753	Retinol-binding protein 4;Plasma retinol-binding protein(1-182);Plasma retinol-binding protein(1-181);Plasma retinol-binding protein(1-179);Plasma retinol-binding protein(1-176)	RBP4
0	0	364110	0	0	0	1	1	1	2.3	2.3	2.3	124.84	0.027642	0.89025	432960	1	Q5TC82-2;Q5TC82	Q5TC82-2;Q5TC82	Roquin-1	RC3H1
0	0	0	0	0	365700	1	1	1	2.9	2.9	2.9	56.084	0.022388	1.0668	567550	2	Q9P258	Q9P258	Protein RCC2	RCC2
17668000	0	0	0	0	0	9	9	9	44.8	44.8	44.8	36.876	0	185.47	18897000	20	Q14257;Q14257-2	Q14257;Q14257-2	Reticulocalbin-2	RCN2
0	0	100060	0	0	0	1	1	1	3.3	3.3	3.3	33.675	0.022305	1.0607	118990	1	P35249-2;P35249	P35249-2;P35249	Replication factor C subunit 4	RFC4
0	0	330210	0	0	0	1	1	1	1.9	1.9	1.9	54.982	0.037627	0.78341	392660	1	O75916-2;O75916-3;O75916-5;O75916	O75916-2;O75916-3;O75916-5;O75916	Regulator of G-protein signaling 9	RGS9
0	0	0	0	0	0	1	1	1	1.8	1.8	1.8	77.499	1	-2	0	1	Q13671-2;Q13671	Q13671-2;Q13671	Ras and Rab interactor 1	RIN1
1720600	0	1065400	2394800	0	1497000	6	6	6	13.6	13.6	13.6	65.582	0	13.284	5481800	13	Q9BRS2	Q9BRS2	Serine/threonine-protein kinase RIO1	RIOK1
0	0	0	0	0	578450	1	1	1	4.7	4.7	4.7	21.617	0.025862	0.95195	862260	1	Q96D59	Q96D59	RING finger protein 183	RNF183
0	0	0	0	0	1046800	1	1	1	0.8	0.8	0.8	240.66	0.042746	0.72199	1351800	1	P56715	P56715	Oxygen-regulated protein 1	RP1
345140	0	0	0	0	0	2	2	2	8.9	8.9	8.9	24.604	0.0070922	1.5745	345140	2	P27635;Q96L21	P27635;Q96L21	60S ribosomal protein L10;60S ribosomal protein L10-like	RPL10;RPL10L
0	0	0	464480	0	0	1	1	1	3.7	3.7	3.7	24.831	0	2.2107	634390	2	P62906	P62906	60S ribosomal protein L10a	RPL10A
0	0	0	0	0	376000	2	2	2	13	13	13	20.124	0	8.8482	1703000	5	P62913-2;P62913	P62913-2;P62913	60S ribosomal protein L11	RPL11
0	0	658310	0	0	0	3	3	3	24.2	24.2	24.2	17.818	0	3.6505	1715000	5	P30050;P30050-2	P30050	60S ribosomal protein L12	RPL12
1766800	3123700	4695300	2935600	0	5348900	6	6	6	27	27	27	24.261	0	29.49	15384000	23	P26373;P26373-2	P26373;P26373-2	60S ribosomal protein L13	RPL13
0	0	563360	0	0	0	3	3	3	14.8	14.8	14.8	23.577	0	5.6431	1104700	6	P40429;Q6NVV1	P40429	60S ribosomal protein L13a	RPL13A
493590	0	0	0	0	0	2	2	2	11.2	11.2	11.2	23.432	0	12.925	1142500	4	P50914	P50914	60S ribosomal protein L14	RPL14
0	0	0	196000	0	0	2	2	2	11.3	11.3	11.3	24.146	0	5.0812	981160	2	P61313;P61313-2	P61313;P61313-2	60S ribosomal protein L15	RPL15
0	0	0	0	0	364310	1	1	1	5.4	5.4	5.4	21.397	0.0272	0.87526	1027100	2	P18621;P18621-3	P18621;P18621-3	60S ribosomal protein L17	RPL17
1258500	0	815970	1030900	0	1204100	3	3	3	23.3	23.3	23.3	18.091	0	38.31	3624000	9	Q07020-2;Q07020	Q07020-2;Q07020	60S ribosomal protein L18	RPL18
0	0	0	0	0	987110	2	2	2	10.2	10.2	10.2	20.762	0.0071942	1.5988	1921800	4	Q02543	Q02543	60S ribosomal protein L18a	RPL18A
1274100	0	0	0	0	0	2	2	2	13.3	13.3	13.3	23.466	0	5.5483	2922100	8	P84098	P84098	60S ribosomal protein L19	RPL19
0	0	0	0	0	377740	2	2	2	13.8	13.8	13.8	18.565	0	2.5219	821070	3	P46778	P46778	60S ribosomal protein L21	RPL21
0	0	0	0	0	393010	1	1	1	8.6	8.6	8.6	14.787	0.018036	1.1888	781520	2	P35268	P35268	60S ribosomal protein L22	RPL22
0	0	0	0	0	685620	1	1	1	7.1	7.1	7.1	14.865	0.016807	1.2611	700540	1	P62829	P62829	60S ribosomal protein L23	RPL23
0	0	4594200	1661400	0	2584700	6	6	6	32.7	32.7	32.7	17.695	0	7.1048	9447700	14	P62750	P62750	60S ribosomal protein L23a	RPL23A
691710	0	758400	719580	0	755750	2	2	2	13.4	13.4	13.4	17.779	0	20.185	2632900	6	P83731	P83731	60S ribosomal protein L24	RPL24
1387400	0	4408100	1886200	0	3219100	6	6	6	29	29	29	17.258	0	7.8908	9696600	18	P61254;Q9UNX3	P61254;Q9UNX3	60S ribosomal protein L26;60S ribosomal protein L26-like 1	RPL26;RPL26L1
0	0	1322200	0	0	1176600	3	3	3	20.6	20.6	20.6	15.798	0	2.3949	2735800	5	P61353	P61353	60S ribosomal protein L27	RPL27
0	0	0	400040	0	0	1	1	1	6.8	6.8	6.8	16.561	0.015021	1.3056	594380	2	P46776	P46776	60S ribosomal protein L27a	RPL27A
152890	0	0	0	0	0	2	2	2	30.4	30.4	30.4	7.888	0.0050378	1.8076	533360	1	P46779-4;P46779-5;P46779;P46779-2;P46779-3	P46779-4;P46779-5;P46779;P46779-2;P46779-3	60S ribosomal protein L28	RPL28
0	0	0	0	0	5744700	2	2	2	14.5	14.5	14.5	17.752	0	13.577	11970000	11	P47914	P47914	60S ribosomal protein L29	RPL29
420510	0	0	0	0	0	3	3	3	7.9	7.9	7.9	46.108	0	2.7138	912150	3	P39023	P39023	60S ribosomal protein L3	RPL3
1271400	0	3634600	2801300	0	2322700	3	3	3	26.4	26.4	26.4	14.463	0	24.652	9348200	15	P62899;P62899-3;P62899-2	P62899;P62899-3;P62899-2	60S ribosomal protein L31	RPL31
0	0	0	0	0	969600	2	2	2	14.5	14.5	14.5	13.293	0.0071259	1.5859	1758300	3	P49207	P49207	60S ribosomal protein L34	RPL34
0	0	7415000	2821600	0	0	2	2	2	13.8	13.8	13.8	14.551	0	36.047	16034000	9	P42766	P42766	60S ribosomal protein L35	RPL35
0	0	0	0	0	260830	1	1	1	8.2	8.2	8.2	12.538	0.016701	1.2511	1004600	3	P18077	P18077	60S ribosomal protein L35a	RPL35A
403950	0	883820	0	0	716950	3	3	3	21	21	21	12.254	0	2.9165	2386700	7	Q9Y3U8	Q9Y3U8	60S ribosomal protein L36	RPL36
0	0	0	0	664850	0	1	1	1	19.6	19.6	19.6	10.275	0.016563	1.2464	149590	1	P61513	P61513	60S ribosomal protein L37a	RPL37A
971310	0	1143800	1200800	0	968950	2	2	2	24.3	24.3	24.3	8.2178	0	4.2768	3523900	8	P63173	P63173	60S ribosomal protein L38	RPL38
0	0	0	0	0	787100	2	2	2	4.4	4.4	4.4	47.697	0.0071599	1.5958	1352300	2	P36578	P36578	60S ribosomal protein L4	RPL4
0	0	661210	0	0	966360	3	3	3	9	9	9	32.728	0	3.6627	1899800	7	Q02878	Q02878	60S ribosomal protein L6	RPL6
1585000	0	1021600	1486200	0	1315400	5	5	5	19.8	19.8	19.8	29.225	0	7.1193	4279100	10	P18124	P18124	60S ribosomal protein L7	RPL7
934960	0	1786400	1182400	0	1324700	2	2	2	9	9	9	29.995	0	34.112	4543000	7	P62424	P62424	60S ribosomal protein L7a	RPL7A
0	0	1894000	0	0	2072900	3	3	3	13.2	13.2	13.2	28.024	0	5.1999	4322300	7	P62917	P62917	60S ribosomal protein L8	RPL8
0	0	0	257930	0	0	3	3	3	20.4	20.4	20.4	27.435	0	3.0916	658810	3	P05388-2;P05388;Q8NHW5	P05388-2;P05388	60S acidic ribosomal protein P0	RPLP0
0	0	0	376030	0	0	1	1	1	14	14	14	11.514	0	2.2297	403080	2	P05386	P05386	60S acidic ribosomal protein P1	RPLP1
0	0	174630	0	0	0	1	1	1	10.4	10.4	10.4	11.665	0.02214	1.0455	207650	1	P05387	P05387	60S acidic ribosomal protein P2	RPLP2
1468400	0	544440	0	0	417710	8	8	8	17.3	17.3	17.3	68.569	0	15.449	2483000	14	P04843	P04843	Dolichyl-diphosphooligosaccharide--protein glycosyltransferase subunit 1	RPN1
727650	0	0	0	0	0	3	3	3	7	7	7	67.723	0	5.3391	727650	3	P04844-2;P04844	P04844-2;P04844	Dolichyl-diphosphooligosaccharide--protein glycosyltransferase subunit 2	RPN2
981770	0	801460	0	0	0	2	2	2	13.9	13.9	13.9	18.898	0	5.733	2411700	7	P46783;Q9NQ39	P46783;Q9NQ39	40S ribosomal protein S10;Putative 40S ribosomal protein S10-like	RPS10;RPS10P5
0	0	0	0	0	283460	1	1	1	6.3	6.3	6.3	18.431	0.0088496	1.4309	214510	1	P62280	P62280	40S ribosomal protein S11	RPS11
0	0	0	0	0	1300900	3	3	3	18.5	18.5	18.5	17.222	0	2.6784	2930300	4	P62277	P62277	40S ribosomal protein S13	RPS13
1766900	0	0	1306900	0	0	4	4	4	34.4	34.4	34.4	16.273	0	6.5083	3998200	7	P62263	P62263	40S ribosomal protein S14	RPS14
1064600	0	625910	0	0	492210	3	3	3	23.8	23.8	23.8	14.839	0	3.3481	2462900	8	P62244	P62244	40S ribosomal protein S15a	RPS15A
1787600	0	1076200	0	0	0	4	4	4	19.9	19.9	19.9	16.445	0	5.4116	3757700	12	P62249	P62249	40S ribosomal protein S16	RPS16
0	0	0	0	0	322090	2	2	2	14.1	14.1	14.1	15.55	0.007109	1.585	316360	2	P08708	P08708	40S ribosomal protein S17	RPS17
7087700	0	5587000	6077800	0	4733800	9	9	9	48.7	48.7	48.7	17.718	0	66.705	24515000	34	P62269	P62269	40S ribosomal protein S18	RPS18
1385300	0	6322400	1864900	0	7234300	6	6	6	35.9	35.9	35.9	16.06	0	15.169	15808000	23	P39019	P39019	40S ribosomal protein S19	RPS19
1485100	0	1227300	0	0	1547300	4	4	4	14.7	14.7	14.7	31.324	0	6.6736	4391100	10	P15880	P15880	40S ribosomal protein S2	RPS2
5054300	0	5429800	5121700	0	5338600	2	2	2	19.3	19.3	19.3	13.373	0	8.7659	17571000	18	P60866;P60866-2	P60866;P60866-2	40S ribosomal protein S20	RPS20
0	0	0	0	0	279270	1	1	1	12	12	12	9.1113	0.019493	1.1332	550260	1	P63220	P63220	40S ribosomal protein S21	RPS21
433840	0	0	0	0	0	2	2	2	20	20	20	15.069	0.0026525	2.0078	433840	2	P62847-2;P62847-3;P62847;P62847-4	P62847-2;P62847-3;P62847;P62847-4	40S ribosomal protein S24	RPS24
0	0	4320800	0	0	4940800	3	3	3	24	24	24	13.742	0	4.7016	10237000	11	P62851	P62851	40S ribosomal protein S25	RPS25
1018600	0	0	0	0	0	2	2	2	20.9	20.9	20.9	13.015	0	3.5716	1401500	4	P62854;Q5JNZ5	P62854;Q5JNZ5	40S ribosomal protein S26;Putative 40S ribosomal protein S26-like 1	RPS26;RPS26P11
2198000	0	1177100	0	0	0	2	2	2	28.6	28.6	28.6	9.461	0	2.2503	3581500	5	P42677;Q71UM5	P42677;Q71UM5	40S ribosomal protein S27;40S ribosomal protein S27-like	RPS27;RPS27L
0	0	1935600	758840	0	2274300	2	2	2	30.4	30.4	30.4	7.8409	0	35.707	5733000	13	P62857	P62857	40S ribosomal protein S28	RPS28
9648600	3967100	5850900	2317000	0	3306200	10	10	10	52.3	52.3	52.3	26.688	0	25.636	22978000	29	P23396;P23396-2	P23396;P23396-2	40S ribosomal protein S3	RPS3
0	0	1169600	0	0	1019500	3	3	3	9.5	9.5	9.5	29.945	0	3.3178	2577300	4	P61247	P61247	40S ribosomal protein S3a	RPS3A
1344500	0	1615700	1266200	0	1623600	6	6	6	26.6	26.6	26.6	29.597	0	11.15	5080900	17	P62701;P22090;Q8TD47	P62701;P22090	40S ribosomal protein S4, X isoform;40S ribosomal protein S4, Y isoform 1	RPS4X;RPS4Y1
930030	0	0	0	0	0	2	2	2	9.2	9.2	9.2	28.68	0	20.846	2059600	3	P62753	P62753	40S ribosomal protein S6	RPS6
1283300	0	629890	1246600	0	807880	3	3	3	17.8	17.8	17.8	24.205	0	35.797	3192000	10	P62241	P62241	40S ribosomal protein S8	RPS8
366580	0	0	0	0	0	1	1	1	4.1	4.1	4.1	22.591	0.01848	1.222	366580	1	P46781	P46781	40S ribosomal protein S9	RPS9
0	0	0	0	0	91022	1	1	1	4.4	4.4	4.4	32.854	0	2.8362	245510	2	P08865	P08865	40S ribosomal protein SA	RPSA
0	0	46800	0	0	0	1	1	1	1.8	1.8	1.8	55.21	0.041609	0.75875	55651	1	Q9Y3I0	Q9Y3I0	tRNA-splicing ligase RtcB homolog	RTCB
266900	0	0	0	0	0	1	1	1	4.7	4.7	4.7	25.609	0.038737	0.77742	266900	1	O95197-3;O95197-4;O95197-7;O95197-2;O95197	O95197-3;O95197-4;O95197-7;O95197-2;O95197	Reticulon-3	RTN3
0	0	340470	0	0	0	3	3	3	12.7	12.7	12.7	42.126	0	2.7424	404860	3	Q9Y265-2;Q9Y265	Q9Y265-2;Q9Y265	RuvB-like 1	RUVBL1
0	0	786300	0	0	605570	3	3	3	8.9	8.9	8.9	46.306	0	3.6158	1392100	4	Q9Y230-2;Q9Y230	Q9Y230-2;Q9Y230	RuvB-like 2	RUVBL2
0	0	0	0	0	128530	1	1	1	11.8	11.8	11.8	10.834	0.026899	0.86402	306930	2	P05109	P05109	Protein S100-A8;Protein S100-A8, N-terminally processed	S100A8
0	0	176490	0	0	0	1	1	1	11.4	11.4	11.4	13.242	0.041725	0.7613	209860	1	P06702	P06702	Protein S100-A9	S100A9
0	0	0	1075100	0	0	1	1	1	1.2	1.2	1.2	112.23	1	-2	861460	1	Q9UJQ4	Q9UJQ4	Sal-like protein 4	SALL4
948310	0	0	0	0	0	5	5	5	13.4	13.4	13.4	51.976	0	7.608	1796000	7	Q9Y512	Q9Y512	Sorting and assembly machinery component 50 homolog	SAMM50
0	0	0	0	0	211710	1	1	1	4.8	4.8	4.8	23.671	0.018557	1.2364	304140	1	P82979	P82979	SAP domain-containing ribonucleoprotein	SARNP
0	0	0	0	0	127280	1	1	1	1.8	1.8	1.8	69.136	0.020952	1.0888	188150	2	Q9UPW6-2;Q9UPW6;Q01826;Q01826-2	Q9UPW6-2;Q9UPW6;Q01826;Q01826-2	DNA-binding protein SATB2;DNA-binding protein SATB1	SATB2;SATB1
0	0	0	0	0	0	1	1	1	7.9	7.9	7.9	15.079	0.018519	1.227	0	1	P22307-6;P22307-2;P22307-4;P22307-7;P22307-8;P22307	P22307-6;P22307-2;P22307-4;P22307-7;P22307-8;P22307	Non-specific lipid-transfer protein	SCP2
909820	0	0	1337900	0	0	5	5	5	7.1	7.1	7.1	103.71	0	5.3066	1309300	7	Q6P3W7	Q6P3W7	SCY1-like protein 2	SCYL2
120800	0	0	0	0	0	1	1	1	5.9	5.9	5.9	17.407	0.025952	0.95603	120800	1	P67812-2;P67812-4;P67812;P67812-3	P67812-2;P67812-4;P67812;P67812-3	Signal peptidase complex catalytic subunit SEC11A	SEC11A
297140	0	0	0	0	0	2	2	2	11.2	11.2	11.2	24.593	0	2.3889	297140	2	O75396	O75396	Vesicle-trafficking protein SEC22b	SEC22B
0	0	375820	0	0	0	2	2	2	5.3	5.3	5.3	38.848	0	2.1455	747070	3	P61619-3;P61619;Q9H9S3-2;Q9H9S3-3;Q9H9S3	P61619-3;P61619;Q9H9S3-2;Q9H9S3-3;Q9H9S3	Protein transport protein Sec61 subunit alpha isoform 1;Protein transport protein Sec61 subunit alpha isoform 2	SEC61A1;SEC61A2
0	0	217210	0	0	0	2	2	2	26	26	26	9.9743	0.0025907	1.9112	1247800	2	P60468	P60468	Protein transport protein Sec61 subunit beta	SEC61B
0	0	0	0	0	6133300	1	1	1	1.5	1.5	1.5	87.392	0.031204	0.80814	7184900	3	Q96T21-2;Q96T21-3;Q96T21	Q96T21-2;Q96T21-3;Q96T21	Selenocysteine insertion sequence-binding protein 2	SECISBP2
0	0	0	0	0	0	1	1	1	2.3	2.3	2.3	50.065	0.022599	1.075	0	5	Q9P0V9-3;Q9P0V9;Q9P0V9-2	Q9P0V9-3;Q9P0V9;Q9P0V9-2	Septin-10	SEPT10
0	0	0	0	0	3442700	6	6	6	20.9	20.9	20.9	42.426	0	34.894	3464100	6	Q8NC51-4;Q8NC51-3;Q8NC51-2;Q8NC51	Q8NC51-4;Q8NC51-3;Q8NC51-2;Q8NC51	Plasminogen activator inhibitor 1 RNA-binding protein	SERBP1
0	0	7250400	0	0	6553800	7	7	7	23.9	23.9	23.9	46.736	0	11.176	15363000	27	P01009;P01009-2;P01009-3	P01009;P01009-2;P01009-3	Alpha-1-antitrypsin;Short peptide from AAT	SERPINA1
0	0	838990	0	0	585470	2	2	2	9.7	9.7	9.7	47.65	0	5.941	1704300	6	P01011;P01011-3;P01011-2	P01011;P01011-3;P01011-2	Alpha-1-antichymotrypsin;Alpha-1-antichymotrypsin His-Pro-less	SERPINA3
0	0	558680	0	0	896230	1	1	1	5	5	5	52.602	0	5.8702	1901400	6	P01008	P01008	Antithrombin-III	SERPINC1
408460	0	0	0	0	0	1	1	1	1.8	1.8	1.8	57.07	0.041209	0.75347	408460	1	P05546	P05546	Heparin cofactor 2	SERPIND1
0	0	0	0	0	83881	1	1	1	3.8	3.8	3.8	30.992	0.030075	0.82444	181480	1	Q01105-3;Q01105-4;Q01105-2;Q01105;P0DME0	Q01105-3;Q01105-4;Q01105-2;Q01105;P0DME0	Protein SET;Protein SETSIP	SET;SETSIP
0	0	0	0	0	214760	1	1	1	1.6	1.6	1.6	88.885	0.03096	0.83894	332990	2	Q15459	Q15459	Splicing factor 3A subunit 1	SF3A1
0	0	0	232870	0	0	1	1	1	0.7	0.7	0.7	145.83	0.026042	0.95959	93148	1	O75533	O75533	Splicing factor 3B subunit 1	SF3B1
0	0	100300	0	0	0	1	1	1	4	4	4	30.209	0.0088106	1.3934	119270	1	Q15393-2;Q15393	Q15393-2;Q15393	Splicing factor 3B subunit 3	SF3B3
0	0	2671000	0	0	2302800	6	6	6	9.5	9.5	9.5	76.149	0	7.1123	5118500	9	P23246;P23246-2	P23246;P23246-2	Splicing factor, proline- and glutamine-rich	SFPQ
0	0	306980	0	0	0	2	2	2	7.1	7.1	7.1	35.619	0	12.57	822240	5	Q9H9B4	Q9H9B4	Sideroflexin-1	SFXN1
135130	0	0	0	0	0	1	1	1	1.5	1.5	1.5	149.62	0.027027	0.86852	135130	0	Q86YV5	Q86YV5	Tyrosine-protein kinase SgK223	SGK223
0	0	0	0	0	0	1	1	1	2.8	2.8	2.8	46.609	0.047436	0.71968	0	1	Q96B97-3;Q96B97-2;Q96B97	Q96B97-3;Q96B97-2;Q96B97	SH3 domain-containing kinase-binding protein 1	SH3KBP1
155180	0	0	0	0	0	1	1	1	2.1	2.1	2.1	59.743	0.02649	0.9087	155180	0	Q9UQ13-2;Q9UQ13	Q9UQ13-2;Q9UQ13	Leucine-rich repeat protein SHOC-2	SHOC2
0	0	26220	0	0	0	1	1	1	3.1	3.1	3.1	35.851	1	-2	31179	0	Q9NRC8-3;Q9NRC8	Q9NRC8-3;Q9NRC8	NAD-dependent protein deacetylase sirtuin-7	SIRT7
0	0	0	1451500	0	0	1	1	1	1.6	1.6	1.6	137.75	1	-2	580590	1	Q15477	Q15477	Helicase SKI2W	SKIV2L
0	0	0	0	0	28751000	1	1	1	1	1	1	119.1	0.021978	1.0375	93693000	4	Q9Y666	Q9Y666	Solute carrier family 12 member 7	SLC12A7
446550	0	0	0	0	0	2	2	2	4.2	4.2	4.2	53.944	0.0026954	2.1013	835210	4	P53985;P53985-2	P53985;P53985-2	Monocarboxylate transporter 1	SLC16A1
0	0	0	0	0	0	1	1	1	2	2	2	56.598	0.031157	0.80653	0	1	Q15758	Q15758	Neutral amino acid transporter B(0)	SLC1A5
96184	0	0	0	0	0	1	1	1	3.9	3.9	3.9	34.012	0.031343	0.81393	96184	1	P53007	P53007	Tricarboxylate transport protein, mitochondrial	SLC25A1
764460	0	0	0	0	0	3	3	3	12.5	12.5	12.5	28.494	0	3.9084	910860	4	Q02978-2;Q02978	Q02978-2;Q02978	Mitochondrial 2-oxoglutarate/malate carrier protein	SLC25A11
321300	0	0	0	0	0	2	2	2	4.6	4.6	4.6	74.175	0.0087912	1.3925	321300	2	Q9UJS0;Q9UJS0-2	Q9UJS0;Q9UJS0-2	Calcium-binding mitochondrial carrier protein Aralar2	SLC25A13
0	0	0	0	0	391880	1	1	1	3.3	3.3	3.3	39.958	0	43.34	2935300	3	Q00325-2;Q00325	Q00325-2;Q00325	Phosphate carrier protein, mitochondrial	SLC25A3
22881000	0	3807200	3241700	0	2225100	9	9	3	29.9	29.9	11.1	32.852	0	25.068	31599000	24	P05141;P12235;Q9H0C2	P05141	ADP/ATP translocase 2;ADP/ATP translocase 2, N-terminally processed	SLC25A5
0	0	0	0	0	159200	7	1	1	23.2	4.4	4.4	32.866	0	12.749	1469200	9	P12236	P12236	ADP/ATP translocase 3;ADP/ATP translocase 3, N-terminally processed	SLC25A6
169190	0	0	0	0	0	1	1	1	2.6	2.6	2.6	57.944	0.022642	1.0764	169190	1	P08195-2;P08195-3;P08195;P08195-4	P08195-2;P08195-3;P08195;P08195-4	4F2 cell-surface antigen heavy chain	SLC3A2
0	0	0	0	0	2660200	1	1	1	2	2	2	72.152	0.0027027	2.1013	4793900	1	Q9UN76	Q9UN76	Sodium- and chloride-dependent neutral and basic amino acid transporter B(0+)	SLC6A14
0	0	256120	0	0	0	1	1	1	4.9	4.9	4.9	53.687	0.038298	0.77145	304550	0	Q6STE5-2;Q6STE5	Q6STE5-2;Q6STE5	SWI/SNF-related matrix-associated actin-dependent regulator of chromatin subfamily D member 3	SMARCD3
0	0	77844	0	0	0	1	1	1	1	1	1	141.54	0.0069124	1.5266	92565	1	Q9UQE7	Q9UQE7	Structural maintenance of chromosomes protein 3	SMC3
3253900	0	0	0	0	0	1	1	1	0.9	0.9	0.9	147.18	0.042313	0.76698	3253900	2	Q9NTJ3	Q9NTJ3	Structural maintenance of chromosomes protein 4	SMC4
0	0	0	0	0	0	1	1	1	3.4	3.4	3.4	64.468	0.024911	0.98386	0	1	Q9Y6H5-6;Q9Y6H5-4;Q9Y6H5;Q9Y6H5-3	Q9Y6H5-6;Q9Y6H5-4;Q9Y6H5;Q9Y6H5-3	Synphilin-1	SNCAIP
181280	0	0	0	0	0	1	1	1	0.7	0.7	0.7	244.5	0.018109	1.2026	181280	1	O75643	O75643	U5 small nuclear ribonucleoprotein 200 kDa helicase	SNRNP200
0	0	0	0	0	465670	1	1	1	3.5	3.5	3.5	31.279	0.014989	1.3056	797230	3	P09012	P09012	U1 small nuclear ribonucleoprotein A	SNRPA
0	0	0	0	0	134980	1	1	1	4.3	4.3	4.3	28.415	0.027113	0.86942	265580	2	P09661	P09661	U2 small nuclear ribonucleoprotein A	SNRPA1
0	0	2415200	0	0	2741400	4	4	4	16.5	16.5	16.5	23.656	0	22.848	5046700	13	P14678-2;P63162;P14678;P63162-2;P14678-3	P14678-2;P63162;P14678;P63162-2;P14678-3	Small nuclear ribonucleoprotein-associated proteins B and B;Small nuclear ribonucleoprotein-associated protein N	SNRPB;SNRPN
0	0	1089800	0	0	1677200	3	3	3	37.8	37.8	37.8	13.281	0	6.0463	3133400	7	P62314	P62314	Small nuclear ribonucleoprotein Sm D1	SNRPD1
0	0	5051300	0	3587200	6449300	5	5	5	38.1	38.1	38.1	13.527	0	18.939	12435000	23	P62316;P62316-2	P62316;P62316-2	Small nuclear ribonucleoprotein Sm D2	SNRPD2
0	0	4111100	0	0	6431500	2	2	2	15.8	15.8	15.8	13.291	0	19.241	10375000	10	P62318-2;P62318	P62318-2;P62318	Small nuclear ribonucleoprotein Sm D3	SNRPD3
0	0	0	296670	0	0	1	1	1	12	12	12	10.803	0.022263	1.0574	118670	1	P62304	P62304	Small nuclear ribonucleoprotein E	SNRPE
0	0	0	0	0	473460	1	1	1	0.8	0.8	0.8	110.96	0.016913	1.2731	4627400	1	Q9Y5W8-2;Q9Y5W8	Q9Y5W8-2;Q9Y5W8	Sorting nexin-13	SNX13
0	0	0	446160000	0	0	1	1	1	1.8	1.8	1.8	89.143	0.018405	1.2162	180760000	10	Q8TEQ0-2;Q8TEQ0	Q8TEQ0-2;Q8TEQ0	Sorting nexin-29	SNX29
0	0	814760	0	0	0	2	2	2	16.9	16.9	16.9	15.936	0	4.4801	1389600	3	P00441	P00441	Superoxide dismutase [Cu-Zn]	SOD1
1592600	0	3358000	6691100	0	3139100	6	6	6	29.4	29.4	29.4	29.6	0	10.274	12229000	23	Q9Y657;Q5JUX0	Q9Y657	Spindlin-1	SPIN1
0	0	1091900	0	0	1371300	10	10	10	4.2	4.2	4.2	282.28	0	21.596	2373300	17	Q13813-3;Q13813;Q13813-2	Q13813-3;Q13813;Q13813-2	Spectrin alpha chain, non-erythrocytic 1	SPTAN1
0	0	0	0	0	205210	1	1	1	0.4	0.4	0.4	251.39	0.025997	0.95629	155300	1	Q01082-3;Q01082-2;Q01082	Q01082-3;Q01082-2;Q01082	Spectrin beta chain, non-erythrocytic 1	SPTBN1
0	0	0	0	0	12476000	1	1	1	0.3	0.3	0.3	268.31	0.0088889	1.4466	9441600	1	O15020-2;O15020	O15020-2;O15020	Spectrin beta chain, non-erythrocytic 2	SPTBN2
0	0	280140	0	0	0	1	1	1	10.3	10.3	10.3	14.57	0	9.9601	333120	2	P37108	P37108	Signal recognition particle 14 kDa protein	SRP14
422000	0	0	0	0	0	2	2	2	10	10	10	29.702	0	2.4917	422000	2	Q9Y5M8	Q9Y5M8	Signal recognition particle receptor subunit beta	SRPRB
0	0	0	680510	0	0	1	1	1	4.8	4.8	4.8	34.212	0.0087527	1.3605	272200	2	Q9UQ35-3;Q9UQ35-2;Q9UQ35	Q9UQ35-3;Q9UQ35-2;Q9UQ35	Serine/arginine repetitive matrix protein 2	SRRM2
1340900	0	869790	3160700	0	666110	6	6	6	24.2	24.2	24.2	27.744	0	9.9215	4480400	15	Q07955;Q07955-3;Q07955-2	Q07955;Q07955-3;Q07955-2	Serine/arginine-rich splicing factor 1	SRSF1
1881200	0	1058400	1941600	0	1042200	3	3	2	28.2	28.2	16.9	14.203	0	5.633	4769200	9	P84103-2;P84103	P84103-2;P84103	Serine/arginine-rich splicing factor 3	SRSF3
669970	0	0	0	0	0	2	2	2	6.3	6.3	6.3	38.418	0	3.236	1400000	5	Q13247-3;Q13247;Q08170;Q13247-2;Q13243-3;Q13243	Q13247-3;Q13247;Q08170;Q13247-2;Q13243-3;Q13243	Serine/arginine-rich splicing factor 6;Serine/arginine-rich splicing factor 4;Serine/arginine-rich splicing factor 5	SRSF6;SRSF4;SRSF5
0	0	0	901010	0	0	2	1	1	19.7	9.1	9.1	15.257	0.0072115	1.6006	1166100	3	Q16629-3;Q16629-2;Q16629-4;Q16629	Q16629-3;Q16629-2;Q16629-4;Q16629	Serine/arginine-rich splicing factor 7	SRSF7
0	0	536430	0	0	402470	2	2	2	5.1	5.1	5.1	46.836	0	3.6825	948130	3	P05455	P05455	Lupus La protein	SSB
0	0	0	22236000	0	0	1	1	1	2.5	2.5	2.5	77.429	0.042802	0.72476	8894400	1	Q8WYL5-2;Q8WYL5-5;Q8WYL5	Q8WYL5-2;Q8WYL5-5;Q8WYL5	Protein phosphatase Slingshot homolog 1	SSH1
211010	0	0	0	0	0	1	1	1	7.6	7.6	7.6	21.08	0	4.3053	211010	1	Q9UNL2;Q9UNL2-2	Q9UNL2;Q9UNL2-2	Translocon-associated protein subunit gamma	SSR3
0	0	0	0	0	147120	2	2	2	3.5	3.5	3.5	59.777	0.0026385	1.9961	347580	3	P31948-3;P31948;P31948-2	P31948-3;P31948;P31948-2	Stress-induced-phosphoprotein 1	STIP1
0	0	0	0	0	468630	4	4	4	12	12	12	54.19	0	4.4138	1359400	5	Q15208	Q15208	Serine/threonine-protein kinase 38	STK38
0	0	0	0	0	388000	1	1	1	8.7	8.7	8.7	17.302	0	4.3571	672460	3	P16949;P16949-2	P16949;P16949-2	Stathmin	STMN1
402930	0	0	0	0	0	3	3	3	13.5	13.5	13.5	33.337	0	11.88	697830	5	Q9UJZ1-2;Q9UJZ1	Q9UJZ1-2;Q9UJZ1	Stomatin-like protein 2, mitochondrial	STOML2
364270	0	0	0	0	0	2	2	2	3.4	3.4	3.4	69.588	0.0025974	1.9153	364270	2	P46977-2;P46977	P46977-2;P46977	Dolichyl-diphosphooligosaccharide--protein glycosyltransferase subunit STT3A	STT3A
418240	0	0	0	0	0	2	2	2	6.9	6.9	6.9	34.856	0	2.2385	418240	2	Q9UNE7;Q9UNE7-2	Q9UNE7;Q9UNE7-2	E3 ubiquitin-protein ligase CHIP	STUB1
0	0	0	0	0	463470	1	1	1	14.1	14.1	14.1	8.1111	0.0089888	1.4605	350740	1	P61956-2;P61956	P61956-2;P61956	Small ubiquitin-related modifier 2	SUMO2
0	0	0	0	0	293320	1	1	1	1.1	1.1	1.1	103.22	0.038462	0.77303	221970	1	Q5T5J6	Q5T5J6	Transcriptional protein SWT1	SWT1
0	34492000	11062000	0	0	33376000	1	1	1	1.3	1.3	1.3	114.19	0	6.9832	66983000	10	Q15431	Q15431	Synaptonemal complex protein 1	SYCP1
0	0	362260	0	0	0	3	2	2	7.6	5.3	5.3	58.735	0	6.0439	654430	3	O60506-4;O60506-3;O60506-2;O60506;O60506-5	O60506-4;O60506-3;O60506-2;O60506	Heterogeneous nuclear ribonucleoprotein Q	SYNCRIP
0	45444000	0	0	0	0	1	1	1	0.2	0.2	0.2	642.66	0.042497	0.73402	19015000	1	Q8NF91-7;Q8NF91-4;Q8NF91	Q8NF91-7;Q8NF91-4;Q8NF91	Nesprin-1	SYNE1
0	0	353140	0	0	348670	2	2	2	11.6	11.6	11.6	22.391	0	12.905	787440	5	P37802;P37802-2	P37802;P37802-2	Transgelin-2	TAGLN2
135990	0	0	0	0	0	1	1	1	2.9	2.9	2.9	44.739	0.022181	1.0465	135990	1	Q13148	Q13148	TAR DNA-binding protein 43	TARDBP
0	0	374330	0	0	0	2	2	2	17.6	17.6	17.6	12.855	0	2.1661	645150	2	O75347;O75347-2	O75347;O75347-2	Tubulin-specific chaperone A	TBCA
247920	0	0	0	0	0	1	1	1	4.9	4.9	4.9	20.345	0.024779	0.98044	247920	1	Q6IPX3-2;Q969E4;Q6IPX3;Q5H9L2	Q6IPX3-2;Q969E4;Q6IPX3;Q5H9L2	Transcription elongation factor A protein-like 6;Transcription elongation factor A protein-like 3;Transcription elongation factor A protein-like 5	TCEAL6;TCEAL3;TCEAL5
0	0	0	6391500	0	0	1	1	1	0.7	0.7	0.7	253.92	0.026273	0.89674	2556600	1	Q07283	Q07283	Trichohyalin	TCHH
3497100	0	2742500	0	0	1402500	12	12	12	26.3	26.3	26.3	60.343	0	45.424	7901100	23	P17987	P17987	T-complex protein 1 subunit alpha	TCP1
1152300	0	0	0	0	0	3	3	3	9.7	9.7	9.7	36.034	0	3.4977	1152300	4	Q9NZ01;Q9NZ01-2	Q9NZ01	Very-long-chain enoyl-CoA reductase	TECR
0	0	15557000	0	0	0	2	2	2	1	1	1	193.7	0.0070258	1.56	18569000	0	O43151-4;O43151;O43151-2	O43151-4;O43151;O43151-2	Methylcytosine dioxygenase TET3	TET3
0	0	52554000	0	0	42613000	13	13	13	26.9	26.9	26.9	77.063	0	185.28	112490000	72	P02787	P02787	Serotransferrin	TF
157420	0	0	0	0	0	1	1	1	1.3	1.3	1.3	84.87	0.012931	1.3192	157420	1	P02786	P02786	Transferrin receptor protein 1;Transferrin receptor protein 1, serum form	TFRC
0	0	322660	0	0	801220	4	4	4	6.5	6.5	6.5	76.631	0	5.626	1085300	5	Q08188	Q08188	Protein-glutamine gamma-glutamyltransferase E;Protein-glutamine gamma-glutamyltransferase E 50 kDa catalytic chain;Protein-glutamine gamma-glutamyltransferase E 27 kDa non-catalytic chain	TGM3
1218400	0	3448100	2949500	0	3222200	11	11	11	11.9	11.9	11.9	108.66	0	31.07	8258100	25	Q9Y2W1	Q9Y2W1	Thyroid hormone receptor-associated protein 3	THRAP3
301740	0	0	0	0	0	1	1	1	8.1	8.1	8.1	21.943	0	2.1128	301740	1	O14925;Q5SRD1	O14925;Q5SRD1	Mitochondrial import inner membrane translocase subunit Tim23;Putative mitochondrial import inner membrane translocase subunit Tim23B	TIMM23;TIMM23B
1057800	0	0	0	0	0	3	3	3	11	11	11	50.464	0	9.7193	1057800	4	Q3ZCQ8-2;Q3ZCQ8;Q3ZCQ8-3	Q3ZCQ8-2;Q3ZCQ8	Mitochondrial import inner membrane translocase subunit TIM50	TIMM50
0	0	0	0	0	0	1	1	1	3.5	3.5	3.5	32.177	0.041995	0.72974	0	1	Q9NPL8	Q9NPL8	Complex I assembly factor TIMMDC1, mitochondrial	TIMMDC1
0	0	0	0	1102000	0	1	1	1	2.9	2.9	2.9	53.174	0.04261	0.7366	247940	1	Q5JTD0-4;Q5JTD0-2;Q5JTD0	Q5JTD0-4;Q5JTD0-2;Q5JTD0	Tight junction-associated protein 1	TJAP1
0	0	0	0	0	522050	1	1	1	14.1	14.1	14.1	7.0662	0.0090498	1.4696	901660	1	Q9Y2S6	Q9Y2S6	Translation machinery-associated protein 7	TMA7
0	0	47857	0	0	0	1	1	1	5	5	5	24.976	0.027597	0.88972	56907	1	P49755	P49755	Transmembrane emp24 domain-containing protein 10	TMED10
177640	0	0	0	0	0	1	1	1	5.2	5.2	5.2	26.005	0.0026667	2.0361	177640	1	Q9Y3A6	Q9Y3A6	Transmembrane emp24 domain-containing protein 5	TMED5
406340	0	0	0	0	0	1	1	1	4.9	4.9	4.9	26.21	0.040431	0.74067	406340	1	Q9BVC6	Q9BVC6	Transmembrane protein 109	TMEM109
0	0	0	0	0	120570	1	1	1	4	4	4	27.978	0.025	0.91601	91241	1	P57088	P57088	Transmembrane protein 33	TMEM33
1372900	0	591660	657360	0	488650	6	6	6	17.6	17.6	17.6	50.67	0	7.8327	2776900	9	P42167;P42167-2;P42167-3;P42166	P42167;P42167-2;P42167-3;P42166	Lamina-associated polypeptide 2, isoforms beta/gamma;Thymopoietin;Thymopentin;Lamina-associated polypeptide 2, isoform alpha;Thymopoietin;Thymopentin	TMPO
520350	0	0	0	0	0	2	2	2	23.2	23.2	23.2	15.521	0	21.005	804250	4	Q9NS69	Q9NS69	Mitochondrial import receptor subunit TOM22 homolog	TOMM22
498150	0	0	0	0	0	2	2	2	6.7	6.7	6.7	34.441	0	5.9753	890470	2	O96008-2;O96008	O96008-2;O96008	Mitochondrial import receptor subunit TOM40 homolog	TOMM40
0	0	0	689800	0	0	3	3	3	3.6	3.6	3.6	109.34	0	2.3987	2977700	2	Q13472-2;Q13472-3;Q13472	Q13472-2;Q13472-3;Q13472	DNA topoisomerase 3-alpha	TOP3A
0	0	0	0	0	730750	3	1	1	11.6	4.6	4.6	32.95	0.018443	1.2201	553010	1	P06753	P06753	Tropomyosin alpha-3 chain	TPM3
0	0	1442300	0	0	2331700	4	4	2	18.6	18.6	10.5	28.955	0	16.388	3796800	9	P06753-3;P06753-4;P06753-5;P06753-6;P06753-2;CON__Q3SX28;P09493-6;P09493-2;P09493-9;P09493-8;P09493-7;P07951;P07951-2;P09493-4;P09493;P67936-2;P06753-7;P09493-3;P67936;P07951-3;P09493-5;P09493-10	P06753-3;P06753-4;P06753-5;P06753-6;P06753-2	Tropomyosin alpha-3 chain	TPM3
0	0	0	0	0	168380	1	1	1	1.5	1.5	1.5	74.267	0.022514	1.0688	232120	2	Q12931-2;Q12931	Q12931-2;Q12931	Heat shock protein 75 kDa, mitochondrial	TRAP1
1020700	0	0	1378800	0	0	7	7	7	17.9	17.9	17.9	54.169	0	7.3813	2410900	9	P19474;P19474-2	P19474;P19474-2	E3 ubiquitin-protein ligase TRIM21	TRIM21
0	0	248480	0	0	0	2	2	2	2.9	2.9	2.9	79.473	0	2.4065	423240	2	Q13263-2;Q13263	Q13263-2;Q13263	Transcription intermediary factor 1-beta	TRIM28
11727000	0	0	0	0	0	1	1	1	4.8	4.8	4.8	50.287	0.041667	0.73875	11727000	1	Q15654	Q15654	Thyroid receptor-interacting protein 6	TRIP6
0	0	0	0	0	79810	1	1	1	1.7	1.7	1.7	114.59	0.026688	0.85319	1992400	1	Q9NRE2-2;Q9NRE2	Q9NRE2-2;Q9NRE2	Teashirt homolog 2	TSHZ2
0	0	0	0	0	663440	1	1	1	1.7	1.7	1.7	58.035	0.026646	0.85185	1082000	1	Q8NHH1-2;Q8NHH1	Q8NHH1-2;Q8NHH1	Tubulin polyglutamylase TTLL11	TTLL11
37111000	17240000	12578000	5990500	11907000	4691100	13	13	10	35.9	35.9	31.4	49.895	0	235.59	75237000	73	Q9BQE3;P68363;Q71U36-2;Q71U36;P68363-2;P0DPH8;P0DPH7;P68366-2;P68366;P0DPH7-2;Q9NY65-2;Q9NY65;Q6PEY2;Q9H853	Q9BQE3;P68363;Q71U36-2;Q71U36;P68363-2;P0DPH8;P0DPH7;P68366-2;P68366;P0DPH7-2;Q9NY65-2;Q9NY65	Tubulin alpha-1C chain;Tubulin alpha-1B chain;Tubulin alpha-1A chain;Tubulin alpha-4A chain;Tubulin alpha-8 chain	TUBA1C;TUBA1B;TUBA1A;TUBA4A;TUBA8
203240	0	0	0	0	0	4	1	1	9.1	4.2	4.2	45.517	0.014925	1.3025	203240	1	A6NHL2-2;A6NHL2	A6NHL2-2;A6NHL2	Tubulin alpha chain-like 3	TUBAL3
16278000	0	8424900	3262000	3832800	5524500	13	13	3	37.6	37.6	9.9	49.67	0	201.08	41201000	68	P07437;Q13885;A6NNZ2;CON__ENSEMBL:ENSBTAP00000025008;Q9H4B7	P07437;Q13885	Tubulin beta chain;Tubulin beta-2A chain	TUBB;TUBB2A
151610	0	0	0	0	0	10	1	1	27.6	2.7	2.7	49.953	0.0025316	1.8317	151610	2	Q9BVA1	Q9BVA1	Tubulin beta-2B chain	TUBB2B
311190	0	0	0	0	0	10	2	1	29.6	6.4	3.8	50.432	0	4.4756	311190	3	Q13509;Q13509-2	Q13509;Q13509-2	Tubulin beta-3 chain	TUBB3
3102600	0	1559700	0	0	820830	12	3	2	33.7	9.4	6.1	49.83	0	9.2292	6074400	15	P68371;P04350;Q3ZCM7	P68371;P04350	Tubulin beta-4B chain;Tubulin beta-4A chain	TUBB4B;TUBB4A
171660	0	0	0	0	0	6	1	1	16.1	2.7	2.7	49.857	0.026534	0.91034	171660	1	Q9BUF5	Q9BUF5	Tubulin beta-6 chain	TUBB6
2963000	0	2609200	0	0	1869300	9	9	9	21.7	21.7	21.7	49.541	0	15.238	8311000	19	P49411	P49411	Elongation factor Tu, mitochondrial	TUFM
0	0	0	0	0	5153600	3	3	3	29.5	29.5	29.5	11.737	0	9.7214	6888500	6	P10599;P10599-2	P10599;P10599-2	Thioredoxin	TXN
0	0	0	1012400	0	0	2	2	2	16.3	16.3	16.3	19.206	0	2.2547	528920	3	O95881	O95881	Thioredoxin domain-containing protein 12	TXNDC12
10296000	17224000	21556000	0	19113000	19243000	3	3	3	26.6	26.6	26.6	14.728	0	118.85	69069000	27	P62987;P62979;P0CG47;P0CG48	P62987;P62979;P0CG47;P0CG48	Ubiquitin-60S ribosomal protein L40;Ubiquitin;60S ribosomal protein L40;Ubiquitin-40S ribosomal protein S27a;Ubiquitin;40S ribosomal protein S27a;Polyubiquitin-B;Ubiquitin;Polyubiquitin-C;Ubiquitin	UBA52;RPS27A;UBB;UBC
0	0	55050	0	0	0	1	1	1	4.9	4.9	4.9	20.9	0.026772	0.85985	65461	0	P61081	P61081	NEDD8-conjugating enzyme Ubc12	UBE2M
5641000	0	0	0	0	0	1	1	1	2.8	2.8	2.8	46.134	1	-2	5641000	1	P0CB47	P0CB47	Putative upstream-binding factor 1-like protein 1	UBTFL1
0	0	0	0	0	117000	1	1	1	4.5	4.5	4.5	24.824	0.042953	0.73863	337670	1	P09936	P09936	Ubiquitin carboxyl-terminal hydrolase isozyme L1	UCHL1
0	0	18153000	0	0	0	2	2	2	4.9	4.9	4.9	48.442	0.0072289	1.6014	49412000	4	P22695	P22695	Cytochrome b-c1 complex subunit 2, mitochondrial	UQCRC2
0	0	0	0	0	161810	1	1	1	25.9	25.9	25.9	6.4575	0	4.4376	780290	2	Q96IX5	Q96IX5	Up-regulated during skeletal muscle growth protein 5	USMG5
0	0	0	0	0	0	1	1	1	1.6	1.6	1.6	55.811	0.042216	0.73145	0	1	Q70EL2-3;Q70EL2	Q70EL2-3;Q70EL2	Ubiquitin carboxyl-terminal hydrolase 45	USP45
0	0	0	0	0	1067100	1	1	1	1	1	1	115.08	0.042781	0.73773	807530	0	P40818-2;P40818	P40818-2;P40818	Ubiquitin carboxyl-terminal hydrolase 8	USP8
113270	0	0	0	0	0	1	1	1	17	17	17	11.309	0.007371	1.6899	113270	1	Q15836;P63027	Q15836;P63027	Vesicle-associated membrane protein 3;Vesicle-associated membrane protein 2	VAMP3;VAMP2
491510	0	0	0	0	0	2	2	2	9.6	9.6	9.6	27.893	0	2.2135	491510	2	Q9P0L0;Q9P0L0-2;O95292-2;O95292	Q9P0L0;Q9P0L0-2;O95292-2;O95292	Vesicle-associated membrane protein-associated protein A;Vesicle-associated membrane protein-associated protein B/C	VAPA;VAPB
2673300	0	1444000	0	0	0	5	5	5	22.6	22.6	22.6	30.772	0	20.537	5191200	9	P21796	P21796	Voltage-dependent anion-selective channel protein 1	VDAC1
12435000	0	5649700	715800	0	956090	5	5	5	20.8	20.8	20.8	30.412	0	79.687	21093000	18	P45880-2;P45880;P45880-1	P45880-2;P45880;P45880-1	Voltage-dependent anion-selective channel protein 2	VDAC2
3950000	0	0	0	0	0	5	5	5	22.6	22.6	22.6	30.658	0	39.306	5187100	8	Q9Y277;Q9Y277-2	Q9Y277;Q9Y277-2	Voltage-dependent anion-selective channel protein 3	VDAC3
1373400	16173000	40446000	0	28263000	59107000	30	30	26	61.4	61.4	56	53.651	0	220.25	115380000	105	P08670;P41219;P17661;P41219-2;P14136-3;P14136;P14136-2;Q16352;P07196;P12036-2;P12036	P08670	Vimentin	VIM
0	0	0	0	0	319960	1	1	1	1.6	1.6	1.6	79.294	0.040984	0.75116	413200	1	Q8IV35	Q8IV35	WD repeat-containing protein 49	WDR49
14937000	16252000	21673000	38016000	13759000	17329000	6	6	6	21.3	21.3	21.3	36.724	0	106.07	79804000	33	Q9BQA1;Q9BQA1-2	Q9BQA1;Q9BQA1-2	Methylosome protein 50	WDR77
0	0	0	0	0	2641000	1	1	1	2.8	2.8	2.8	40.418	0.014957	1.3035	1998600	1	P09544	P09544	Protein Wnt-2	WNT2
0	0	0	0	0	0	1	1	1	3.4	3.4	3.4	39.327	0.042105	0.73027	0	1	P56706	P56706	Protein Wnt-7b	WNT7B
272520	0	0	0	0	0	1	1	1	1.5	1.5	1.5	123.38	0.042254	0.76613	272520	1	O14980	O14980	Exportin-1	XPO1
121400	0	0	0	0	0	1	1	1	0.8	0.8	0.8	136.31	0.042691	0.72195	121400	1	Q9HAV4	Q9HAV4	Exportin-5	XPO5
0	0	56907	0	0	0	1	1	1	1.2	1.2	1.2	109.96	0.025467	0.92977	156120	1	O43592	O43592	Exportin-T	XPOT
0	0	65032	0	0	0	1	1	1	1.9	1.9	1.9	65.148	0.036657	0.79725	77330	1	P12956-2;P12956	P12956-2;P12956	X-ray repair cross-complementing protein 6	XRCC6
3397600	0	9136200	4006100	11352000	6715000	10	10	6	50.6	50.6	38.3	35.924	0	143.57	28322000	42	P67809;Q9Y2T7	P67809	Nuclease-sensitive element-binding protein 1	YBX1
194260	0	0	0	0	0	6	2	2	18.5	7.8	7.8	40.089	0	2.5223	695010	2	P16989;P16989-3;P16989-2	P16989;P16989-3;P16989-2	Y-box-binding protein 3	YBX3
142420	0	0	0	0	0	1	1	1	4.7	4.7	4.7	27.989	0.002611	1.9237	142420	1	Q969M3;Q969M3-3	Q969M3;Q969M3-3	Protein YIPF5	YIPF5
117950	0	0	0	0	0	1	1	1	2.3	2.3	2.3	56.877	0.025685	0.94663	117950	1	Q9Y5A9-2;Q9Y5A9	Q9Y5A9-2;Q9Y5A9	YTH domain-containing family protein 2	YTHDF2
0	0	442390	0	0	333470	4	3	3	17.3	13.3	13.3	29.174	0	3.651	815470	4	P62258;P62258-2	P62258;P62258-2	14-3-3 protein epsilon	YWHAE
1042400	0	782670	0	0	474500	5	5	4	29.8	29.8	25.7	27.764	0	41.44	3021600	17	P27348;P31947-2;P31946-2;Q04917;P31946;P61981;P31947	P27348	14-3-3 protein theta	YWHAQ
0	0	388520	0	0	299700	4	3	3	20.8	16.7	16.7	27.745	0	14.748	709070	4	P63104;P63104-2	P63104;P63104-2	14-3-3 protein zeta/delta	YWHAZ
0	0	0	0	3385600	0	1	1	1	1.8	1.8	1.8	61.6	0.021505	0.99533	761730	1	Q05516-2;Q05516	Q05516-2;Q05516	Zinc finger and BTB domain-containing protein 16	ZBTB16
0	0	0	212340	0	0	1	1	1	2.5	2.5	2.5	48.99	0.02521	0.92014	84936	1	P24278	P24278	Zinc finger and BTB domain-containing protein 25	ZBTB25
0	0	0	0	0	2551000	1	1	1	0.7	0.7	0.7	151.08	0.0026042	1.9195	2581300	3	Q14202-2;Q14202	Q14202-2;Q14202	Zinc finger MYM-type protein 3	ZMYM3
0	19489000	0	0	0	0	1	1	1	6	6	6	33.828	0.0089087	1.4471	8154900	2	O14771-2;O14771	O14771-2;O14771	Zinc finger protein 213	ZNF213
1695500	0	0	0	0	0	1	1	1	0.5	0.5	0.5	288.28	1	-2	1695500	1	O60281-2;O60281	O60281-2;O60281	Zinc finger protein 292	ZNF292
0	1306800	0	0	0	0	1	1	1	1.9	1.9	1.9	55.13	0.047497	0.71993	16102000	2	Q96PQ6-3;Q96PQ6-4;Q96PQ6-2;Q96PQ6	Q96PQ6-3;Q96PQ6-4;Q96PQ6-2;Q96PQ6	Zinc finger protein 317	ZNF317
165640	0	0	0	0	0	1	1	1	2.6	2.6	2.6	44.235	0.039604	0.76873	165640	0	Q66K41	Q66K41	Zinc finger protein 385C	ZNF385C
0	0	0	994880	0	0	1	1	1	2.9	2.9	2.9	43.211	0.047315	0.71947	397950	0	Q8TAU3-2;Q96SQ5-2;Q96SQ5;Q8TAU3	Q8TAU3-2;Q96SQ5-2;Q96SQ5;Q8TAU3	Zinc finger protein 417;Zinc finger protein 587	ZNF417;ZNF587
0	0	543830	0	0	0	1	1	1	3.5	3.5	3.5	62.919	0.042667	0.7371	646680	1	Q8TBZ5	Q8TBZ5	Zinc finger protein 502	ZNF502
0	0	0	0	0	47382	1	1	1	1.6	1.6	1.6	77.166	0.047254	0.71929	112000	0	Q76KX8	Q76KX8	Zinc finger protein 534	ZNF534
0	0	0	0	0	554240	1	1	1	0.8	0.8	0.8	200.76	0.02243	1.0685	1059700	2	O15015;O15015-2	O15015;O15015-2	Zinc finger protein 646	ZNF646
0	0	0	0	0	865200	1	1	1	0.5	0.5	0.5	177.95	0.022059	1.041	2418200	2	Q5JPB2	Q5JPB2	Zinc finger protein 831	ZNF831
0	0	304510	0	0	0	1	1	1	0.6	0.6	0.6	252.82	0.042838	0.73797	362100	1	B2C4J3	B2C4J3
0	0	0	0	0	122270000	1	1	1	2.6	2.6	2.6	54.678	0.025295	0.92334	444560000	13	CON__ENSEMBL:ENSBTAP00000031360	CON__ENSEMBL:ENSBTAP00000031360
185780000	811110000	686680000	242020000	714820000	688740000	4	4	4	25.1	25.1	25.1	24.409	0	142.91	2048100000	224	CON__P00761	CON__P00761
5278300	50725000	106100000	15991000	95569000	80264000	8	8	8	54.8	54.8	54.8	22.975	0	323.31	255550000	115	CON__P02662	CON__P02662
0	0	35260000	0	32523000	39169000	9	9	9	48.3	48.3	48.3	24.348	0	86.281	95576000	39	CON__P02663	CON__P02663
0	33299000	29259000	0	35011000	11229000	4	4	4	32.1	32.1	32.1	23.583	0	323.31	69697000	22	CON__P02666	CON__P02666
0	0	3444800	0	7838200	4026300	3	3	3	23.7	23.7	23.7	18.974	0	31.372	9079400	10	CON__P02668	CON__P02668
0	23929000	34878000	0	22631000	36002000	7	7	7	37	37	37	18.281	0	86.202	88806000	36	CON__P02754	CON__P02754
3275700	0	8416300	5590100	0	9111400	14	14	12	22.6	22.6	18.9	69.293	0	32.084	23691000	31	CON__P02769	CON__P02769
0	0	1431400	0	0	0	2	2	2	2.5	2.5	2.5	138.44	0	4.9291	2444500	3	CON__P04258	CON__P04258
0	0	0	0	0	412550	7	1	1	10.8	2.1	2.1	47.754	0.017613	1.1409	577810	2	CON__P08730-1	CON__P08730-1
0	0	0	0	0	1476600	2	2	2	5.8	5.8	5.8	38.418	0.0026455	2	1745800	3	CON__P12763	CON__P12763
409940	0	0	0	0	0	5	1	1	9	1.5	1.5	49.586	0.030441	0.83137	409940	1	CON__P13646-1	CON__P13646-1
0	0	2368400	0	0	0	6	1	1	11.4	3	3	44.541	0.014862	1.2984	2816300	1	CON__P19001	CON__P19001
0	0	0	0	0	356460	1	1	1	4.6	4.6	4.6	29.241	0.0049751	1.7536	269760	1	CON__P31096	CON__P31096
0	0	190330	0	0	0	1	1	1	1.2	1.2	1.2	188.74	1	-2	226320	1	CON__Q1A7A4	CON__Q1A7A4
1697800	0	0	0	0	0	1	1	1	4.5	4.5	4.5	68.932	0.040377	0.73973	1697800	1	CON__Q32PI4	CON__Q32PI4
0	229250	0	0	0	0	3	1	1	14.9	5.5	5.5	22.06	0.026187	0.8959	179890	1	CON__Q3SX09;CON__P02070;P69892;P69891;P02100	CON__Q3SX09;CON__P02070
0	0	0	44084000	0	0	1	1	1	3.4	3.4	3.4	64.718	0.0069767	1.5404	25140000	2	P21073;O72736	P21073;O72736
0	0	364260	0	0	0	1	1	1	1.7	1.7	1.7	54.697	0.022556	1.0726	433150	1	O75164-2	O75164-2
131680	0	0	0	0	0	1	1	1	1.2	1.2	1.2	79.31	0.029595	0.84437	131680	1	P03072;P14999;P03071	P03072;P14999;P03071
0	0	0	1692800	0	0	1	1	1	0.8	0.8	0.8	153.93	0.030395	0.83136	733420	0	P0C704;P0C703;P03226	P0C704;P0C703;P03226
0	0	0	0	0	478320	1	1	1	2.4	2.4	2.4	54.999	0	2.1744	609550	3	P03243	P03243
0	0	395740	0	0	217510	2	2	2	14.8	14.8	14.8	20.614	0	2.6233	828820	4	P03246;P03247	P03246;P03247
0	0	0	0	0	282130	2	2	2	5.4	5.4	5.4	63.453	0.0089485	1.4497	2425900	2	P03420;P13843;P12568;O36634	P03420;P13843;P12568;O36634
0	36900000	0	0	0	0	1	1	1	1.9	1.9	1.9	65.184	0.041899	0.76247	15440000	0	P09287	P09287
0	0	0	0	0	618710	2	2	2	14.8	14.8	14.8	16.837	0	5.9046	468220	3	P0DP25;P0DP24;P0DP23	P0DP25;P0DP24;P0DP23
0	0	110890	0	0	0	1	1	1	3.8	3.8	3.8	47.493	0.048223	0.71487	131860	1	P12490	P12490
0	0	0	0	0	0	1	1	1	3	3	3	38.196	0.017822	1.1576	0	2	P15882-2	P15882-2
2390700	0	0	0	0	0	1	1	1	2.7	2.7	2.7	73.837	0.035346	0.7999	2390700	1	Q6SW62;P16753	Q6SW62;P16753
0	0	40652	0	0	0	1	1	1	1.2	1.2	1.2	96.475	0.041494	0.75725	48339	0	P18799	P18799
0	0	154850	0	0	0	1	1	1	2.5	2.5	2.5	97.475	0.047194	0.71868	184140	0	P20888	P20888
0	0	0	0	0	0	1	1	1	5.6	5.6	5.6	26.605	0.040486	0.74082	0	1	P21021	P21021
0	0	0	0	0	553120	1	1	1	3	3	3	59.48	1	-2	1113200	0	P24530-3	P24530-3
0	6382100	0	0	0	0	1	1	1	3.6	3.6	3.6	56.603	0.045103	0.72086	2670400	1	P24838	P24838
0	0	0	0	0	662150	1	1	1	0.7	0.7	0.7	256.38	1	-2	501090	1	P26676	P26676
0	0	0	0	0	414370	1	1	1	0.6	0.6	0.6	245.4	0.026132	0.96263	3322900	4	P29813	P29813
0	0	70024	0	0	0	1	1	1	0.7	0.7	0.7	378.02	0.042135	0.76456	83266	0	P29837	P29837
0	0	0	0	0	194350	1	1	1	1.7	1.7	1.7	73.252	0.04065	0.74483	1562100	0	P36725	P36725
0	0	0	0	0	2366700	1	1	1	7.8	7.8	7.8	19.037	0.030722	0.83545	2783700	1	P36806	P36806
1633600	0	0	0	0	0	1	1	1	1.8	1.8	1.8	72.926	0.026446	0.9061	1633600	1	P49748-3	P49748-3
0	0	0	2272200	0	0	1	1	1	2.8	2.8	2.8	55.84	0.014894	1.2986	908860	2	P50819	P50819
0	0	0	2687300	0	0	1	1	1	0.6	0.6	0.6	255.92	1	-2	1103800	1	Q88434;Q03396	Q88434;Q03396
0	0	0	282180000	0	0	1	1	1	4	4	4	36.219	0.017717	1.1461	112870000	1	Q13491-4	Q13491-4
0	0	0	0	758600	0	1	1	1	2.6	2.6	2.6	38.864	0.030257	0.82745	170680	0	Q15119-2	Q15119-2
0	0	2451300	0	0	0	1	1	1	8.4	8.4	8.4	15.537	0.023214	0.99025	2914900	1	Q1A5X7-2	Q1A5X7-2
0	0	0	0	0	0	1	1	1	1.7	1.7	1.7	55.146	0.047134	0.71844	0	1	Q2M2H8-3;Q2M2H8	Q2M2H8-3;Q2M2H8	Probable maltase-glucoamylase-like protein LOC93432;Glucoamylase
1747000	0	0	0	0	0	1	1	1	4.5	4.5	4.5	37.212	1	-2	1747000	1	Q32NB8-3	Q32NB8-3
0	0	0	0	0	218720	1	1	1	4.5	4.5	4.5	24.933	0.047375	0.71967	821090	1	Q50LE6	Q50LE6
0	0	0	0	0	0	1	1	1	0.7	0.7	0.7	138.41	0.038352	0.77208	0	1	Q5WQY5	Q5WQY5
0	0	0	1168200	0	0	1	1	1	3.5	3.5	3.5	61.73	0.021739	1.011	467270	1	Q6DQ15;Q80A28;Q6J8F6;Q80A30;Q6DQ22;Q80A22;Q80A26;Q6DQ18;Q6J8E7;Q6DQ21;Q6DQ20;Q6DQ19;Q9Q0U6;Q8QPL1	Q6DQ15;Q80A28;Q6J8F6;Q80A30;Q6DQ22;Q80A22;Q80A26;Q6DQ18;Q6J8E7;Q6DQ21;Q6DQ20;Q6DQ19;Q9Q0U6;Q8QPL1
0	0	0	5105900	0	0	1	1	1	1.6	1.6	1.6	98.779	0.025907	0.95279	7273000	2	Q8NB50-3	Q8NB50-3
315430	0	0	0	0	0	1	1	1	2	2	2	88	0.047074	0.71765	315430	1	Q8V7J0	Q8V7J0
0	0	0	0	0	88521	1	1	1	3.3	3.3	3.3	32.952	1	-2	175540	0	Q8WXH4-3	Q8WXH4-3
455380	0	0	0	0	0	1	1	1	3.5	3.5	3.5	49.915	0.040816	0.74839	455380	1	Q96GZ6-7	Q96GZ6-7
0	0	0	0	0	45132	1	1	1	0.9	0.9	0.9	120.34	1	-2	34154	0	Q9HAZ2-4	Q9HAZ2-4
0	0	0	14419000	0	0	1	1	1	3.6	3.6	3.6	55.665	0.035398	0.80005	6483400	1	Q9QC00;Q9QBZ9	Q9QC00;Q9QBZ9
881560	0	0	0	0	0	1	1	1	0.5	0.5	0.5	242.98	0.027375	0.88101	881560	1	Q9QSP0	Q9QSP0
397780	0	0	0	0	0	1	1	1	15.4	15.4	15.4	17.398	0.049118	0.71159	397780	1	Q9UC07-2	Q9UC07-2
0	0	0	0	0	370130	1	1	1	0.7	0.7	0.7	185.54	0.020992	1.0908	698610	1	Q9ULH0-2	Q9ULH0-2
0	0	0	0	0	144060	1	1	1	1.6	1.6	1.6	88.291	0.019342	1.1185	112440000	4	Q9WSV7	Q9WSV7
0	0	0	0	0	3819300	1	1	1	1	1	1	107.57	0.02673	0.85822	6587900	1	Q9Y2H0-1	Q9Y2H0-1
45777000	0	0	0	0	0	1	1	1	0	0	0	63.864	1	-2	45777000	1	REV__A2A2Y4-2;REV__A2A2Y4	REV__A2A2Y4-2;REV__A2A2Y4
0	0	0	0	0	12242000	1	1	1	0	0	0	79.945	0.018634	1.2456	23253000	1	REV__Q9NYA3;REV__P0CG33;REV__A6NDN3;REV__A6NDK9	REV__Q9NYA3;REV__P0CG33;REV__A6NDN3;REV__A6NDK9
0	0	0	1670600	0	0	1	1	1	0	0	0	32.249	1	-2	1932600	0	REV__F8VTS6;REV__A6NLU0	REV__F8VTS6;REV__A6NLU0
0	0	5003200	0	0	0	1	1	1	0	0	0	90.952	0.021113	1.0958	5949400	1	REV__A8MZA4;REV__H0YM25	REV__A8MZA4;REV__H0YM25
0	0	0	0	0	176100	1	1	1	0	0	0	18.194	0.048346	0.71713	133270	1	REV__O15151-4;REV__O15151-5;REV__O15151	REV__O15151-4;REV__O15151-5;REV__O15151
834660	0	0	0	0	0	1	1	1	0	0	0	114.71	0.0091954	1.511	834660	1	REV__O43897	REV__O43897
0	0	346090	0	0	0	1	1	1	0	0	0	167.69	0.032593	0.80444	411540	1	REV__O60312	REV__O60312
0	0	0	5499100	0	0	1	1	1	0	0	0	150.7	0.024955	0.98782	2199600	2	REV__O60503	REV__O60503
0	0	0	1136300	0	0	1	1	1	0	0	0	69.236	0.031056	0.84129	454520	1	REV__O60765;REV__Q96LW1	REV__O60765;REV__Q96LW1
0	0	0	4586800	0	0	1	1	1	0	0	0	161.57	0.04522	0.7212	1894700	1	REV__Q9QBZ5;REV__Q9QBY3;REV__P18802;REV__Q9QBZ1;REV__O93215;REV__P12499	REV__Q9QBZ5;REV__Q9QBY3;REV__P18802;REV__Q9QBZ1;REV__O93215;REV__P12499
0	0	0	0	0	804550	1	1	1	0	0	0	71.089	0.046392	0.72077	3112600	1	REV__O94966-2;REV__O94966-4;REV__O94966-3;REV__O94966;REV__O94966-7;REV__O94966-6;REV__O94966-5	REV__O94966-2;REV__O94966-4;REV__O94966-3;REV__O94966;REV__O94966-7;REV__O94966-6;REV__O94966-5
647630	0	0	0	0	0	1	1	1	0	0	0	100.82	0.026578	0.91274	1295300	1	REV__O95197-7;REV__O95197-2;REV__O95197	REV__O95197-7;REV__O95197-2;REV__O95197
0	0	0	0	0	276090	1	1	1	0	0	0	57.241	0.041723	0.73879	563420	1	REV__P08631-3;REV__P08631-2;REV__P08631-4;REV__P08631	REV__P08631-3;REV__P08631-2;REV__P08631-4;REV__P08631
0	0	0	0	0	13150000	1	1	1	0	0	0	52.157	0.027823	0.89185	61686000	5	REV__P10546;REV__P10545	REV__P10546;REV__P10545
0	0	0	0	0	91257000	1	1	1	0	0	0	78.264	0.034074	0.80356	416860000	5	REV__Q6SW46;REV__Q68101;REV__P16788	REV__Q6SW46;REV__Q68101;REV__P16788
233630	0	0	0	0	0	1	1	1	0	0	0	17.647	0.049305	0.71175	467260	1	REV__P25484;REV__P36808	REV__P25484;REV__P36808
0	0	0	0	0	289860	1	1	1	0	0	0	312.3	1	-2	219360	1	REV__P35555	REV__P35555
0	0	0	0	0	150860000	1	1	1	0	0	0	56.039	0.041018	0.76858	117350000	4	REV__P36782	REV__P36782
56672000	0	0	0	0	0	2	2	2	0	0	0	155.02	0.0074442	1.7166	255820000	3	REV__P46939-4;REV__P46939;REV__P46939-2;REV__P46939-3	REV__P46939-4;REV__P46939;REV__P46939-2;REV__P46939-3
0	7673300	0	0	0	0	1	1	1	0	0	0	180.29	1	-2	3210700	1	REV__P53675-2;REV__Q00610-2;REV__P53675;REV__Q00610	REV__P53675-2;REV__Q00610-2;REV__P53675;REV__Q00610
0	0	0	0	0	200250	1	1	1	0	0	0	8.1828	0.036765	0.79852	487580	1	REV__P60602	REV__P60602
0	0	0	0	0	329000	1	1	1	0	0	0	56.03	0.03139	0.81837	248980	1	REV__Q9WSZ6;REV__Q00683	REV__Q9WSZ6;REV__Q00683
0	0	0	0	0	3439500	1	1	1	0	0	0	103.69	0.019531	1.1343	15090000	2	REV__Q02779	REV__Q02779
0	0	0	0	0	7902100	1	1	1	0	0	0	212.35	0.022684	1.0784	5980100	1	REV__Q13698	REV__Q13698
0	0	0	10979000	0	0	2	2	2	0	0	0	512.6	0.00271	2.106	31925000	6	REV__Q15149-7;REV__Q15149-8;REV__Q15149-9;REV__Q15149-5;REV__Q15149-4;REV__Q15149-6;REV__Q15149-3;REV__Q15149-2;REV__Q15149	REV__Q15149-7;REV__Q15149-8;REV__Q15149-9;REV__Q15149-5;REV__Q15149-4;REV__Q15149-6;REV__Q15149-3;REV__Q15149-2;REV__Q15149
381580	0	0	0	0	0	1	1	1	0	0	0	263.15	0.028169	0.85088	763150	1	REV__Q15652-3;REV__Q15652	REV__Q15652-3;REV__Q15652
0	0	0	0	0	185540	1	1	1	0	0	0	75.171	0.023297	0.99532	140410	1	REV__Q16513-5;REV__Q16513-4;REV__Q16513-3;REV__Q16513-2;REV__Q16513	REV__Q16513-5;REV__Q16513-4;REV__Q16513-3;REV__Q16513-2;REV__Q16513
0	0	0	0	0	176110	1	1	1	0	0	0	137.95	0.029641	0.84717	4799700	5	REV__Q2M1K9-2;REV__Q2M1K9;REV__Q96K83	REV__Q2M1K9-2;REV__Q2M1K9;REV__Q96K83
0	0	0	0	0	3041400	1	1	1	0	0	0	86.435	0.042373	0.76762	2301600	1	REV__Q2TAL8	REV__Q2TAL8
0	0	0	0	0	4625400	1	1	1	0	0	0	86.061	0.043928	0.7212	8613900	1	REV__Q2VC93	REV__Q2VC93
982470	0	0	0	0	0	1	1	1	0	0	0	103.96	1	-2	982470	0	REV__Q4KMQ2-3;REV__Q4KMQ2;REV__Q4KMQ2-4;REV__Q4KMQ2-2	REV__Q4KMQ2-3;REV__Q4KMQ2;REV__Q4KMQ2-4;REV__Q4KMQ2-2
32306	0	0	0	0	0	1	1	1	0	0	0	480.19	1	-2	32306	0	REV__Q7Z6Z7-2;REV__Q7Z6Z7-3;REV__Q7Z6Z7	REV__Q7Z6Z7-2;REV__Q7Z6Z7-3;REV__Q7Z6Z7
0	0	0	0	0	1379100	1	1	1	0	0	0	48.984	0.035503	0.8015	1043600	1	REV__Q86X53	REV__Q86X53
0	0	910220	0	0	0	1	1	1	0	0	0	111.9	1	-2	2164700	1	REV__Q86YV0	REV__Q86YV0
0	0	0	0	0	291890	1	1	1	0	0	0	38.155	0.04325	0.7295	220900	1	REV__Q8N9I9-2	REV__Q8N9I9-2
0	0	0	1363600	0	0	1	1	1	0	0	0	35.311	1	-2	545440	1	REV__Q8NGC6	REV__Q8NGC6
0	7673300	0	0	0	0	1	1	1	0	0	0	67.768	0.047558	0.72055	3210700	1	REV__Q8TAT5	REV__Q8TAT5
0	0	0	0	0	4714300	1	1	1	0	0	0	106.21	0.043011	0.73865	3567600	1	REV__Q8TB72-2;REV__Q8TB72-4;REV__Q8TB72-3;REV__Q8TB72	REV__Q8TB72-2;REV__Q8TB72-4;REV__Q8TB72-3;REV__Q8TB72
0	0	0	0	0	171650000	2	2	2	0	0	0	111.81	0.0050505	1.8094	901210000	10	REV__Q8WX94;REV__Q8WX94-2;REV__Q8WX94-3	REV__Q8WX94;REV__Q8WX94-2;REV__Q8WX94-3
0	0	0	785860	0	0	1	1	1	0	0	0	140.93	0.016985	1.2975	314340	1	REV__Q96PV0-3;REV__Q96PV0-2;REV__Q96PV0-4;REV__Q96PV0	REV__Q96PV0-3;REV__Q96PV0-2;REV__Q96PV0-4;REV__Q96PV0
0	8760200	0	0	0	0	1	1	1	0	0	0	22.578	0.015054	1.3059	5008400	2	REV__Q96S19	REV__Q96S19
0	0	0	0	0	13690000	1	1	1	0	0	0	95.581	0.03966	0.76923	25566000	5	REV__Q9BUQ8	REV__Q9BUQ8
0	0	445780	0	0	0	2	2	2	0	0	0	120.75	0.01087	1.3502	1009300	2	REV__Q9C0B7	REV__Q9C0B7
0	0	187990	0	0	0	1	1	1	0	0	0	289.57	0.038961	0.7809	223540	2	REV__Q9C0G6-4;REV__Q9C0G6	REV__Q9C0G6-4;REV__Q9C0G6
0	0	0	0	0	1515700	1	1	1	0	0	0	56.933	0.013043	1.343	7500200	4	REV__Q9UNN5-2;REV__Q9UNN5	REV__Q9UNN5-2;REV__Q9UNN5
217680	0	0	0	0	0	1	1	1	0	0	0	118.52	0.037681	0.78805	217680	1	REV__Q9Y4F9	REV__Q9Y4F9
479990	0	0	0	0	0	1	1	1	0	0	0	44.377	0.026455	0.97145	479990	1	REV__Q9Y606-2;REV__Q9Y606	REV__Q9Y606-2;REV__Q9Y606

## Sheet: Supplementary Table S2
Table S2: The p-value and log2 difference of proteins immunoprecipitating with DNAJC11WT-FLAG in HEK293 cells after statistical analysis with Perseus software in difference descending order for each cluster.
Protein IDs	Protein names	Gene names	Student's T-test p-value	Student's T-test Difference
Q9NVH1-3;Q9NVH1;Q9NVH1-2	DnaJ homolog subfamily C member 11	DNAJC11	0.0121644	6.67512
P0DMV8;P0DMV9;P0DMV8-2	Heat shock 70 kDa protein 1A;Heat shock 70 kDa protein 1B	HSPA1A;HSPA1B	0.0693892	3.2716
P50402	Emerin	EMD	0.113258	3.21604
Q16891-2;Q16891;Q16891-3;Q16891-4	MICOS complex subunit MIC60	IMMT	0.0374607	3.05393
P21796	Voltage-dependent anion-selective channel protein 1	VDAC1	0.0361355	2.91312
P11142;P11142-2;P54652	Heat shock cognate 71 kDa protein	HSPA8	0.0509176	2.74886
P45880-2;P45880;P45880-1	Voltage-dependent anion-selective channel protein 2	VDAC2	0.00765376	2.74065
P49411	Elongation factor Tu, mitochondrial	TUFM	0.147202	2.66281
Q9NVT9;Q9NVT9-2	Armadillo repeat-containing protein 1	ARMC1	0.0973986	2.65477
P17987	T-complex protein 1 subunit alpha	TCP1	0.0544581	2.54896
P62249	40S ribosomal protein S16	RPS16	0.00589562	2.45154
P05023-4;P05023;P05023-3;P05023-2;P13637;P13637-2;P13637-3;P50993;Q13733;P20648	Sodium/potassium-transporting ATPase subunit alpha-1	ATP1A1	0.114888	2.4044
Q9NZT1	Calmodulin-like protein 5	CALML5	0.0780387	2.34185
P06733;P06733-2;P13929-3;P09104-2;P13929-2;P13929;P09104	Alpha-enolase	ENO1	0.0323458	2.29401
P05141;P12235;Q9H0C2	ADP/ATP translocase 2;ADP/ATP translocase 2, N-terminally processed	SLC25A5	0.144131	2.13815
Q9NX63	MICOS complex subunit MIC19	CHCHD3	0.129975	2.09326
Q9NXV2	BTB/POZ domain-containing protein KCTD5	KCTD5	0.384416	2.08347
P49368;P49368-2;P68626	T-complex protein 1 subunit gamma	CCT3	0.109033	2.00658
P06748;P06748-2;P06748-3	Nucleophosmin	NPM1	0.269278	1.91748
P38646	Stress-70 protein, mitochondrial	HSPA9	0.120274	1.89401
P04843	Dolichyl-diphosphooligosaccharide--protein glycosyltransferase subunit 1	RPN1	0.204827	1.8919
P81605;P81605-2	Dermcidin;Survival-promoting peptide;DCD-1	DCD	0.237143	1.87633
P62987;P62979;P0CG47;P0CG48	Ubiquitin-60S ribosomal protein L40;Ubiquitin;60S ribosomal protein L40;Ubiquitin-40S ribosomal protein S27a;Ubiquitin;40S ribosomal protein S27a;Polyubiquitin-B;Ubiquitin;Polyubiquitin-C;Ubiquitin	UBA52;RPS27A;UBB;UBC	0.440685	1.87336
P50990-3;P50990-2;P50990	T-complex protein 1 subunit theta	CCT8	0.159302	1.87147
P23588;P23588-2	Eukaryotic translation initiation factor 4B	EIF4B	0.358286	1.85039
P26641;P26641-2	Elongation factor 1-gamma	EEF1G	0.116763	1.84821
P68371;P04350;Q3ZCM7	Tubulin beta-4B chain;Tubulin beta-4A chain	TUBB4B;TUBB4A	0.168366	1.79952
Q9Y285-2;Q9Y285	Phenylalanine--tRNA ligase alpha subunit	FARSA	0.240114	1.76676
P25789;P25789-2	Proteasome subunit alpha type-4	PSMA4	0.270828	1.76357
Q99623;Q99623-2	Prohibitin-2	PHB2	0.209724	1.70066
Q7L7L0;P20671;P04908;Q93077;Q99878;Q96KK5;Q9BTM1;Q16777;Q6FI13;P0C0S8;P16104;Q96QV6;Q9BTM1-2;P0C0S5;Q71UI9;Q71UI9-2;Q71UI9-3;Q8IUE6;Q71UI9-4;Q71UI9-5	Histone H2A type 3;Histone H2A type 1-D;Histone H2A type 1-B/E;Histone H2A type 1-C;Histone H2A type 1-J;Histone H2A type 1-H;Histone H2A.J;Histone H2A type 2-C;Histone H2A type 2-A;Histone H2A type 1;Histone H2AX;Histone H2A type 1-A;Histone H2A.Z;Histone H2A.V	HIST3H2A;HIST1H2AD;HIST1H2AB;HIST1H2AC;HIST1H2AJ;HIST1H2AH;H2AFJ;HIST2H2AC;HIST2H2AA3;HIST1H2AG;H2AFX;HIST1H2AA;H2AFZ;H2AFV	0.260173	1.69063
P06493;P06493-2;O94921-2;Q9NYV4;Q9NYV4-2;Q14004-2;Q9NYV4-3;Q00536-2;Q00537-2;Q00537;Q07002-3;Q00536-3;Q00536;P50750-2;Q07002;O94921;Q96Q40;Q00535-2;Q96Q40-5;O94921-3;Q96Q40-3;Q96Q40-4;P50750;Q96Q40-6;Q00534;Q00526;P11802;P24941;Q00535;P24941-2;Q14004	Cyclin-dependent kinase 1;Cyclin-dependent kinase 14;Cyclin-dependent kinase 12;Cyclin-dependent kinase 13;Cyclin-dependent kinase 16;Cyclin-dependent kinase 17;Cyclin-dependent kinase 18;Cyclin-dependent kinase 9;Cyclin-dependent kinase 15;Cyclin-dependent-like kinase 5;Cyclin-dependent kinase 6;Cyclin-dependent kinase 3;Cyclin-dependent kinase 4;Cyclin-dependent kinase 2	CDK1;CDK14;CDK12;CDK13;CDK16;CDK17;CDK18;CDK9;CDK15;CDK5;CDK6;CDK3;CDK4;CDK2	0.308389	1.63222
P78527;P78527-2	DNA-dependent protein kinase catalytic subunit	PRKDC	0.341753	1.6183
P42677;Q71UM5	40S ribosomal protein S27;40S ribosomal protein S27-like	RPS27;RPS27L	0.178011	1.59599
P23396;P23396-2	40S ribosomal protein S3	RPS3	0.0589559	1.5924
P11021	78 kDa glucose-regulated protein	HSPA5	0.191336	1.57145
P27348;P31947-2;P31946-2;Q04917;P31946;P61981;P31947	14-3-3 protein theta	YWHAQ	0.170658	1.54974
P27824-2;P27824;P27824-3	Calnexin	CANX	0.220258	1.5435
Q9BQE3;P68363;Q71U36-2;Q71U36;P68363-2;P0DPH8;P0DPH7;P68366-2;P68366;P0DPH7-2;Q9NY65-2;Q9NY65;Q6PEY2;Q9H853	Tubulin alpha-1C chain;Tubulin alpha-1B chain;Tubulin alpha-1A chain;Tubulin alpha-4A chain;Tubulin alpha-8 chain	TUBA1C;TUBA1B;TUBA1A;TUBA4A;TUBA8	0.0673433	1.52932
P06576	ATP synthase subunit beta, mitochondrial	ATP5B	0.164392	1.5255
P15880	40S ribosomal protein S2	RPS2	0.323344	1.50952
P40227;P40227-2;Q92526;Q92526-2;Q92526-3	T-complex protein 1 subunit zeta;T-complex protein 1 subunit zeta-2	CCT6A;CCT6B	0.135772	1.46808
P62244	40S ribosomal protein S15a	RPS15A	0.118683	1.44877
Q15431	Synaptonemal complex protein 1	SYCP1	0.673754	1.41832
P46783;Q9NQ39	40S ribosomal protein S10;Putative 40S ribosomal protein S10-like	RPS10;RPS10P5	0.144724	1.33043
P61204-2;P84077;P61204;P84085	ADP-ribosylation factor 3;ADP-ribosylation factor 1;ADP-ribosylation factor 5	ARF3;ARF1;ARF5	0.119949	1.30171
P42167;P42167-2;P42167-3;P42166	Lamina-associated polypeptide 2, isoforms beta/gamma;Thymopoietin;Thymopentin;Lamina-associated polypeptide 2, isoform alpha;Thymopoietin;Thymopentin	TMPO	0.182122	1.28955
P48643;P48643-2	T-complex protein 1 subunit epsilon	CCT5	0.0418018	1.28836
P50991;P50991-2	T-complex protein 1 subunit delta	CCT4	0.00661881	1.28301
P25705;P25705-2;P25705-3	ATP synthase subunit alpha, mitochondrial	ATP5A1	0.0384316	1.26952
Q9Y3U8	60S ribosomal protein L36	RPL36	0.321159	1.2532
O43175	D-3-phosphoglycerate dehydrogenase	PHGDH	0.0377256	1.22636
P14618;P14618-3;P14618-2;P30613-2;P30613	Pyruvate kinase PKM	PKM	0.344943	1.21009
P19338	Nucleolin	NCL	0.379031	1.20277
P07437;Q13885;A6NNZ2;CON__ENSEMBL:ENSBTAP00000025008;Q9H4B7	Tubulin beta chain;Tubulin beta-2A chain	TUBB;TUBB2A	0.0821276	1.15831
P07355-2;P07355;A6NMY6	Annexin A2;Putative annexin A2-like protein	ANXA2;ANXA2P2	0.442066	1.10123
Q07021	Complement component 1 Q subcomponent-binding protein, mitochondrial	C1QBP	0.414637	1.01462
P84103-2;P84103	Serine/arginine-rich splicing factor 3	SRSF3	0.295013	0.99635
O60825-2;O60825;P16118-2;P16118	6-phosphofructo-2-kinase/fructose-2,6-bisphosphatase 2;6-phosphofructo-2-kinase;Fructose-2,6-bisphosphatase	PFKFB2	0.346499	0.943818
P11940-2;P11940;Q9H361;Q4VXU2;Q4VXU2-2;Q96DU9-2;Q96DU9	Polyadenylate-binding protein 1;Polyadenylate-binding protein 3	PABPC1;PABPC3	0.213851	0.887344
P04406;P04406-2	Glyceraldehyde-3-phosphate dehydrogenase	GAPDH	0.567699	0.826355
P62269	40S ribosomal protein S18	RPS18	0.413551	0.800315
P78371;P78371-2	T-complex protein 1 subunit beta	CCT2	0.388187	0.786311
P08238;Q58FF8;Q58FF7	Heat shock protein HSP 90-beta	HSP90AB1	0.417222	0.785721
P62241	40S ribosomal protein S8	RPS8	0.419138	0.765519
P62701;P22090;Q8TD47	40S ribosomal protein S4, X isoform;40S ribosomal protein S4, Y isoform 1	RPS4X;RPS4Y1	0.289526	0.75263
P63173	60S ribosomal protein L38	RPL38	0.280729	0.701988
O00571-2;O00571;O15523-2;O15523;O15523-3;Q9NQI0-3;Q9NQI0-2;Q9NQI0-4;Q9NQI0	ATP-dependent RNA helicase DDX3X;ATP-dependent RNA helicase DDX3Y	DDX3X;DDX3Y	0.245416	0.688235
P84090	Enhancer of rudimentary homolog	ERH	0.594934	0.655905
Q00839-2;Q00839	Heterogeneous nuclear ribonucleoprotein U	HNRNPU	0.417839	0.65133
P60866;P60866-2	40S ribosomal protein S20	RPS20	0.432087	0.59427
P08670;P41219;P17661;P41219-2;P14136-3;P14136;P14136-2;Q16352;P07196;P12036-2;P12036	Vimentin	VIM	0.859941	0.572731
P62424	60S ribosomal protein L7a	RPL7A	0.412042	0.535877
P61221	ATP-binding cassette sub-family E member 1	ABCE1	0.673592	0.53524
P18124	60S ribosomal protein L7	RPL7	0.399365	0.530993
P39019	40S ribosomal protein S19	RPS19	0.67174	0.509103
P63261;P60709;P63267-2;Q6S8J3;A5A3E0;P0CG38;Q9BYX7;P0CG39	Actin, cytoplasmic 2;Actin, cytoplasmic 2, N-terminally processed;Actin, cytoplasmic 1;Actin, cytoplasmic 1, N-terminally processed	ACTG1;ACTB	0.264427	0.502176
P83731	60S ribosomal protein L24	RPL24	0.547891	0.499159
P31943;P55795	Heterogeneous nuclear ribonucleoprotein H;Heterogeneous nuclear ribonucleoprotein H, N-terminally processed;Heterogeneous nuclear ribonucleoprotein H2	HNRNPH1;HNRNPH2	0.475638	0.479272
Q5VTE0;P68104;P68104-2;Q05639	Putative elongation factor 1-alpha-like 3;Elongation factor 1-alpha 1;Elongation factor 1-alpha 2	EEF1A1P5;EEF1A1;EEF1A2	0.701709	0.452518
P26373;P26373-2	60S ribosomal protein L13	RPL13	0.710643	0.367874
Q92522	Histone H1x	H1FX	0.596389	0.366504
P62857	40S ribosomal protein S28	RPS28	0.763841	0.323764
P98175-2;P98175;P98175-5;P98175-4;P98175-3	RNA-binding protein 10	RBM10	0.631391	0.314632
Q07020-2;Q07020	60S ribosomal protein L18	RPL18	0.51235	0.272321
P61254;Q9UNX3	60S ribosomal protein L26;60S ribosomal protein L26-like 1	RPL26;RPL26L1	0.666291	0.265488
Q9Y2W1	Thyroid hormone receptor-associated protein 3	THRAP3	0.771408	0.244607
Q14681	BTB/POZ domain-containing protein KCTD2	KCTD2	0.904621	0.203025
P62899;P62899-3;P62899-2	60S ribosomal protein L31	RPL31	0.761818	0.175426
P52732	Kinesin-like protein KIF11	KIF11	0.957032	0.155852
P16403;P10412;P16402;P22492;Q02539;P16401	Histone H1.2;Histone H1.4;Histone H1.3	HIST1H1C;HIST1H1E;HIST1H1D	0.928199	0.0708357
P07900;P07900-2;Q14568;Q58FF6;Q58FG0	Heat shock protein HSP 90-alpha	HSP90AA1	0.966869	0.059473
P62805	Histone H4	HIST1H4A	0.916051	-0.0956326
Q9BRS2	Serine/threonine-protein kinase RIO1	RIOK1	0.82369	-0.0960655
P54105	Methylosome subunit pICln	CLNS1A	0.917881	-0.107011
Q07955;Q07955-3;Q07955-2	Serine/arginine-rich splicing factor 1	SRSF1	0.868823	-0.142164
Q9Y657;Q5JUX0	Spindlin-1	SPIN1	0.801081	-0.234563
Q9BQA1;Q9BQA1-2	Methylosome protein 50	WDR77	0.609421	-0.261588
P62750	60S ribosomal protein L23a	RPL23A	0.795159	-0.36158
Q06830;Q13162	Peroxiredoxin-1	PRDX1	0.536791	-0.439344
P61978-3;P61978;P61978-2	Heterogeneous nuclear ribonucleoprotein K	HNRNPK	0.228373	-0.459588
O75688;O75688-4;O75688-2;O75688-5;O75688-3;P35813-2;P35813;P35813-3	Protein phosphatase 1B	PPM1B	0.510727	-0.531699
P67809;Q9Y2T7	Nuclease-sensitive element-binding protein 1	YBX1	0.459871	-0.532532
Q02413	Desmoglein-1	DSG1	0.754166	-0.588387
P38159;P38159-2;Q96E39;P38159-3;O75526;Q8IZ40;Q8N7X1	RNA-binding motif protein, X chromosome;RNA-binding motif protein, X chromosome, N-terminally processed;RNA binding motif protein, X-linked-like-1	RBMX;RBMXL1	0.538689	-0.607695
O14744;O14744-5;O14744-2;O14744-3;O14744-4	Protein arginine N-methyltransferase 5;Protein arginine N-methyltransferase 5, N-terminally processed	PRMT5	0.0535723	-0.834309
P62316;P62316-2	Small nuclear ribonucleoprotein Sm D2	SNRPD2	0.608145	-0.960019
P01023;P20742-2;P20742	Alpha-2-macroglobulin	A2M	0.466219	-1.05637
A2NJV5;A0A0A0MRZ7;A0A075B6S2;A0A075B6S6;A0A075B6P5;A0A0C4DH68;A0A087WW87;P06310;P01615;P01614		IGKV A18;IGKV2D-26;IGKV2D-29	0.489273	-1.12101
P35579;P35579-2	Myosin-9	MYH9	0.613125	-1.30983
Q9HAY2	Melanoma-associated antigen F1	MAGEF1	0.713127	-1.65761

## Sheet: Supplementary Table S3
Table S3: Cellular component content and biological process content of putative DNAJC11 interactors in HEK293 cells grouped in Enrichment analysis of Cytoscape using the ClueGO/CluePedia plugins, presented in Figure 1D-E.
	Cellular component
	GOTerm	Term PValue Corrected with Benjamini-Hochberg	% Associated Genes	Nr. Genes	Associated Genes Found
	Ribosome	4.13289e-15	6.58436	16	[CANX, DDX3X, NPM1, RPL36, RPL38, RPS10, RPS15A, RPS16, RPS18, RPS2, RPS20, RPS27, RPS3, RPS4X, RPS8, UBA52]
	Chaperonin-containing T-complex	3.19371e-14	58.3333	7	[CCT2, CCT3, CCT4, CCT5, CCT6A, CCT8, TCP1]
	Mitochondrial protein complex	2.49381e-05	4.08163	6	[ATP5A1, ATP5B, CHCHD3, DNAJC11, IMMT, VDAC1]
	Biological process
	GOTerm	Term PValue Corrected with Benjamini-Hochberg	% Associated Genes	Nr. Genes	Associated Genes Found
	mRNA processing	9.07461e-16	5.30726	19	[EIF4B, HNRNPU, HSPA1A, HSPA8, PABPC1, PSMA4, RPL36, RPL38, RPS10, RPS15A, RPS16, RPS18, RPS2, RPS20, RPS27, RPS3, RPS4X, RPS8, UBA52]
	Regulation of protein stability	6.13703e-12	5.09091	14	[CCT2, CCT3, CCT4, CCT5, CCT6A, CCT8, GAPDH, HSP90AB1, HSPA1A, HSPA8, NPM1, PHB2, PRKDC, TCP1]
	Mitochondrial membrane organization	7.78235e-08	5.92593	8	[ATP5A1, ATP5B, CHCHD3, DNAJC11, HSPA1A, IMMT, SLC25A5, YWHAQ]

## Sheet: Supplementary Table S4
Table S4: MiST scoring of proteins immunoprecipitating with DNAJC11WT-FLAG in HEK293 cells is given in score descending order.
Prey	gene	Specificity	Reproducibility	Abundance	MiST score	Ip
Q9NVH1	DNAJC11	0.983972	0.976186	0.0712364	0.97613	DnaJC11_1,DnaJC11_2,DnaJC11_3
P23396	RPS3	0.896352	0.951794	0.0056888	0.908149	DnaJC11_1,DnaJC11_2,DnaJC11_3
P11142	HSPA8	0.893583	0.952224	0.016105	0.906445	DnaJC11_1,DnaJC11_2,DnaJC11_3
P0DMV8	HSPA1A	0.94281	0.799085	0.0115975	0.892917	DnaJC11_1,DnaJC11_2,DnaJC11_3
Q9Y285	FARSA	1	0.628362	0.000166699	0.87938	DnaJC11_1,DnaJC11_3
P42677	RPS27	1	0.616827	0.00185466	0.875831	DnaJC11_1,DnaJC11_3
P21796	VDAC1	1	0.616147	0.000672939	0.875614	DnaJC11_1,DnaJC11_3
P62249	RPS16	1	0.606283	0.000931173	0.872572	DnaJC11_1,DnaJC11_3
Q9NZT1	CALML5	1	0.59901	0.000847974	0.870328	DnaJC11_1,DnaJC11_3
P06493	CDK1	1	0.584616	0.000179079	0.865883	DnaJC11_1,DnaJC11_3
Q9NX63	CHCHD3	1	0.583593	0.000654368	0.86557	DnaJC11_1,DnaJC11_3
P46783	RPS10	1	0.567187	0.00055172	0.860508	DnaJC11_1,DnaJC11_3
P45880	VDAC2	0.944681	0.626823	0.00273072	0.840998	DnaJC11_1,DnaJC11_3
Q9NVT9	ARMC1	1	0.490495	0.000499581	0.836845	DnaJC11_1,DnaJC11_3
P06733	ENO1	1	0.476755	0.000495279	0.832606	DnaJC11_1,DnaJC11_3
Q16891	IMMT	0.941865	0.5986	0.00136391	0.830352	DnaJC11_1,DnaJC11_3
P05023	ATP1A1	0.930693	0.569625	0.000151202	0.813746	DnaJC11_1,DnaJC11_3
P68371	TUBB4B	0.876788	0.621359	0.000476372	0.792758	DnaJC11_1,DnaJC11_3
P26373	RPL13	0.790852	0.780119	0.00438391	0.782853	DnaJC11_1,DnaJC11_2,DnaJC11_3
P04843	RPN1	0.849033	0.630911	0.000140456	0.776677	DnaJC11_1,DnaJC11_3
P05141	SLC25A5	0.876026	0.561339	0.00323724	0.773734	DnaJC11_1,DnaJC11_3
Q9BQE3	TUBA1C	0.727251	0.887217	0.0108399	0.772336	DnaJC11_1,DnaJC11_2,DnaJC11_3
P50402	EMD	0.98319	0.311594	0.00196684	0.770134	DnaJC11_1,DnaJC11_3
P17987	TCP1	0.861092	0.573194	0.000567495	0.767138	DnaJC11_1,DnaJC11_3
P50990	CCT8	0.828539	0.627778	0.000147184	0.761661	DnaJC11_1,DnaJC11_3
Q07021	C1QBP	0.836218	0.605059	0.000391054	0.759917	DnaJC11_1,DnaJC11_3
P27348	YWHAQ	0.841379	0.579436	0.000372831	0.755549	DnaJC11_1,DnaJC11_3
P62244	RPS15A	0.817087	0.608638	0.000613823	0.747908	DnaJC11_1,DnaJC11_3
P25705	ATP5A1	0.795999	0.630783	0.000523976	0.740284	DnaJC11_1,DnaJC11_3
P48643	CCT5	0.792809	0.628582	0.000583384	0.737418	DnaJC11_1,DnaJC11_3
P50991	CCT4	0.806494	0.588886	0.000419385	0.734551	DnaJC11_1,DnaJC11_3
P49411	TUFM	0.810179	0.555244	0.000640602	0.726699	DnaJC11_1,DnaJC11_3
P26641	EEF1G	0.794248	0.590139	0.000384059	0.726542	DnaJC11_1,DnaJC11_3
P27824	CANX	0.852748	0.453383	0.000365548	0.724452	DnaJC11_1,DnaJC11_3
P84077	ARF3	0.78665	0.598871	0.000456394	0.724029	DnaJC11_1,DnaJC11_3
Q99623	PHB2	0.817215	0.525658	0.00042268	0.722393	DnaJC11_1,DnaJC11_3
P61221	ABCE1	0.806762	0.515901	7.11984e-05	0.712215	DnaJC11_1,DnaJC11_3
O43175	PHGDH	0.763923	0.604425	0.000424518	0.710162	DnaJC11_1,DnaJC11_3
P42167	TMPO	0.747854	0.628782	0.000189736	0.70666	DnaJC11_1,DnaJC11_3
O60825	PFKFB2	0.750185	0.59839	0.000134508	0.698881	DnaJC11_1,DnaJC11_3
P49368	CCT3	0.802009	0.472801	0.000543263	0.695662	DnaJC11_1,DnaJC11_3
P16403	HIST1H1C	0.683151	0.731716	0.0482854	0.694351	DnaJC11_1,DnaJC11_2,DnaJC11_3
P63261	ACTG1	0.63578	0.827635	0.0178235	0.69129	DnaJC11_1,DnaJC11_2,DnaJC11_3
Q5VTE0	EEF1A1P5	0.681179	0.725574	0.012054	0.690888	DnaJC11_1,DnaJC11_2,DnaJC11_3
Q15431	SYCP1	0.842331	0.356832	0.00663031	0.687559	DnaJC11_2,DnaJC11_3
P06576	ATP5B	0.821442	0.39808	0.000496775	0.68593	DnaJC11_1,DnaJC11_3
Q96KT6	LINC00208	1	9.10239e-11	0.0285849	0.68568	DnaJC11_1
P09287	CVC2	1	9.10239e-11	0.0103667	0.685572	DnaJC11_2
O14771	ZNF213	1	9.10239e-11	0.00690668	0.685551	DnaJC11_2
Q15811	ITSN1	1	9.10239e-11	0.00478656	0.685539	DnaJC11_3
Q6P444	MTFR2	1	9.10239e-11	0.00476912	0.685538	DnaJC11_3
Q16719	KYNU	1	9.10239e-11	0.00454047	0.685537	DnaJC11_1
P22695	UQCRC2	1	9.10239e-11	0.00311745	0.685529	DnaJC11_3
P24838	L1	1	9.10239e-11	0.00205572	0.685522	DnaJC11_2
Q9NV70	EXOC1	1	9.10239e-11	0.00197253	0.685522	DnaJC11_2
Q14257	RCN2	1	9.10239e-11	0.00162842	0.68552	DnaJC11_1
Q1A5X7-2	WHAMMP3	1	9.10239e-11	0.00145571	0.685519	DnaJC11_3
P49588	AARS	1	9.10239e-11	0.00105103	0.685516	DnaJC11_3
Q13618	CUL3	1	9.10239e-11	0.00097691	0.685516	DnaJC11_3
P02810	PRH1	1	9.10239e-11	0.000875237	0.685515	DnaJC11_3
Q8NF91	SYNE1	1	9.10239e-11	0.0008403	0.685515	DnaJC11_2
O43151	TET3	1	9.10239e-11	0.000729067	0.685514	DnaJC11_3
Q15654	TRIP6	1	9.10239e-11	0.00071981	0.685514	DnaJC11_1
P15531	NME1	1	9.10239e-11	0.000660896	0.685514	DnaJC11_3
P00441	SOD1	1	9.10239e-11	0.000411584	0.685512	DnaJC11_3
P29966	MARCKS	1	9.10239e-11	0.000410859	0.685512	DnaJC11_3
Q9Y277	VDAC3	1	9.10239e-11	0.000407801	0.685512	DnaJC11_1
Q03393	PTS	1	9.10239e-11	0.000357957	0.685512	DnaJC11_3
Q96PQ6	ZNF317	1	9.10239e-11	0.00035726	0.685512	DnaJC11_2
O00411	POLRMT	1	9.10239e-11	0.000346585	0.685512	DnaJC11_3
P30050	RPL12	1	9.10239e-11	0.000310382	0.685512	DnaJC11_3
P49023	PXN	1	9.10239e-11	0.000275002	0.685512	DnaJC11_2
O75347	TBCA	1	9.10239e-11	0.000269638	0.685512	DnaJC11_3
P62854	RPS26	1	9.10239e-11	0.000258788	0.685512	DnaJC11_1
Q99417	MYCBP	1	9.10239e-11	0.000254502	0.685512	DnaJC11_3
P30041	PRDX6	1	9.10239e-11	0.000243299	0.685511	DnaJC11_3
Q96DF8	DGCR14	1	9.10239e-11	0.00023747	0.685511	DnaJC11_3
P30086	PEBP1	1	9.10239e-11	0.000217833	0.685511	DnaJC11_3
P40429	RPL13A	1	9.10239e-11	0.000215894	0.685511	DnaJC11_3
P36542	ATP5C1	1	9.10239e-11	0.000211795	0.685511	DnaJC11_1
P84098	RPL19	1	9.10239e-11	0.000189926	0.685511	DnaJC11_1
P31689	DNAJA1	1	9.10239e-11	0.000187336	0.685511	DnaJC11_1
P22626	HNRNPA2B1	1	9.10239e-11	0.000176594	0.685511	DnaJC11_3
Q99729	HNRNPAB	1	9.10239e-11	0.000176547	0.685511	DnaJC11_3
P60468	SEC61B	1	9.10239e-11	0.000176019	0.685511	DnaJC11_3
P37108	SRP14	1	9.10239e-11	0.000160246	0.685511	DnaJC11_3
P02765	AHSG	1	9.10239e-11	0.00013524	0.685511	DnaJC11_3
Q9UHV9	PFDN2	1	9.10239e-11	0.000127977	0.685511	DnaJC11_3
O75936	BBOX1	1	9.10239e-11	0.000125475	0.685511	DnaJC11_1
Q9P035	HACD3	1	9.10239e-11	0.000122801	0.685511	DnaJC11_1
P06702	S100A9	1	9.10239e-11	0.000120438	0.685511	DnaJC11_3
P05387	RPLP2	1	9.10239e-11	0.000118133	0.685511	DnaJC11_3
P60842	EIF4A1	1	9.10239e-11	0.000114904	0.685511	DnaJC11_1
Q9H0U4	RAB1A	1	9.10239e-11	0.000113771	0.685511	DnaJC11_1
Q9NZ01	TECR	1	9.10239e-11	0.000109308	0.685511	DnaJC11_1
P62753	RPS6	1	9.10239e-11	0.000109128	0.685511	DnaJC11_1
O14818	PSMA7	1	9.10239e-11	0.000108731	0.685511	DnaJC11_3
P35613	BSG	1	9.10239e-11	0.000107211	0.685511	DnaJC11_3
Q9NS69	TOMM22	1	9.10239e-11	0.000107064	0.685511	DnaJC11_1
O14880	MGST3	1	9.10239e-11	0.00010445	0.685511	DnaJC11_3
O00264	PGRMC1	1	9.10239e-11	0.000100218	0.685511	DnaJC11_1
Q6SW62	UL80 APNG	1	9.10239e-11	9.86574e-05	0.685511	DnaJC11_1
P42704	LRPPRC	1	9.10239e-11	9.70592e-05	0.685511	DnaJC11_3
P62847	RPS24	1	9.10239e-11	9.5305e-05	0.685511	DnaJC11_1
P51151	RAB9A	1	9.10239e-11	9.42769e-05	0.685511	DnaJC11_1
Q9Y6C9	MTCH2	1	9.10239e-11	9.03419e-05	0.685511	DnaJC11_3
Q3ZCQ8	TIMM50	1	9.10239e-11	8.75521e-05	0.685511	DnaJC11_1
P35232	PHB	1	9.10239e-11	8.62916e-05	0.685511	DnaJC11_1
P12268	IMPDH2	1	9.10239e-11	8.45888e-05	0.685511	DnaJC11_3
Q569K6	CCDC157	1	9.10239e-11	8.16826e-05	0.68551	DnaJC11_2
P56134	ATP5J2	1	9.10239e-11	8.13636e-05	0.68551	DnaJC11_1
Q7Z4H9	FAM220A	1	9.10239e-11	8.03478e-05	0.68551	DnaJC11_3
Q9UC07-2	ZNF69	1	9.10239e-11	7.8e-05	0.68551	DnaJC11_1
Q8TBZ5	ZNF502	1	9.10239e-11	7.77703e-05	0.68551	DnaJC11_3
Q9H9B4	SFXN1	1	9.10239e-11	7.41659e-05	0.68551	DnaJC11_3
P24534	EEF1B2	1	9.10239e-11	7.41531e-05	0.68551	DnaJC11_1
Q9NTJ3	SMC4	1	9.10239e-11	7.38119e-05	0.68551	DnaJC11_1
Q9H1C7	CYSTM1	1	9.10239e-11	7.31935e-05	0.68551	DnaJC11_1
Q02978	SLC25A11	1	9.10239e-11	7.11317e-05	0.68551	DnaJC11_1
P33316	DUT	1	9.10239e-11	7.10123e-05	0.68551	DnaJC11_3
P49748-3	ACADVL	1	9.10239e-11	7.0397e-05	0.68551	DnaJC11_1
O60884	DNAJA2	1	9.10239e-11	6.77838e-05	0.68551	DnaJC11_1
Q14562	DHX8	1	9.10239e-11	6.71138e-05	0.68551	DnaJC11_3
P50914	RPL14	1	9.10239e-11	6.70758e-05	0.68551	DnaJC11_1
P30048	PRDX3	1	9.10239e-11	6.45544e-05	0.68551	DnaJC11_3
Q92598	HSPH1	1	9.10239e-11	6.3767e-05	0.68551	DnaJC11_1
P0DOX7	IGKC	1	9.10239e-11	6.17195e-05	0.68551	DnaJC11_3
P02745	C1QA	1	9.10239e-11	6.14641e-05	0.68551	DnaJC11_3
P61619	SEC61A1	1	9.10239e-11	6.14218e-05	0.68551	DnaJC11_3
Q96DN6	MBD6	1	9.10239e-11	6.00674e-05	0.68551	DnaJC11_2
Q99832	CCT7	1	9.10239e-11	5.96988e-05	0.68551	DnaJC11_1
Q9Y512	SAMM50	1	9.10239e-11	5.90766e-05	0.68551	DnaJC11_1
O75164-2	KDM4A	1	9.10239e-11	5.89137e-05	0.68551	DnaJC11_3
P12004	PCNA	1	9.10239e-11	5.88843e-05	0.68551	DnaJC11_1
P43487	RANBP1	1	9.10239e-11	5.84505e-05	0.68551	DnaJC11_3
Q9Y265	RUVBL1	1	9.10239e-11	5.8085e-05	0.68551	DnaJC11_3
Q9P0L0	VAPA	1	9.10239e-11	5.76728e-05	0.68551	DnaJC11_1
Q13247	SRSF6	1	9.10239e-11	5.6903e-05	0.68551	DnaJC11_1
P14868	DARS	1	9.10239e-11	5.55323e-05	0.68551	DnaJC11_3
P46781	RPS9	1	9.10239e-11	5.52084e-05	0.68551	DnaJC11_1
P25205	MCM3	1	9.10239e-11	5.40517e-05	0.68551	DnaJC11_1
Q99615	DNAJC7	1	9.10239e-11	5.34999e-05	0.68551	DnaJC11_1
Q16769	QPCT	1	9.10239e-11	5.29521e-05	0.68551	DnaJC11_3
P02671	FGA	1	9.10239e-11	5.24925e-05	0.68551	DnaJC11_3
Q14974	KPNB1	1	9.10239e-11	5.22707e-05	0.68551	DnaJC11_1
P12277	CKB	1	9.10239e-11	5.2153e-05	0.68551	DnaJC11_3
O00303	EIF3F	1	9.10239e-11	5.06472e-05	0.68551	DnaJC11_3
Q9BVC6	TMEM109	1	9.10239e-11	4.88564e-05	0.68551	DnaJC11_1
P23284	PPIB	1	9.10239e-11	4.8546e-05	0.68551	DnaJC11_3
Q8WW22	DNAJA4	1	9.10239e-11	4.81531e-05	0.68551	DnaJC11_1
P39656	DDOST	1	9.10239e-11	4.78066e-05	0.68551	DnaJC11_1
Q9BRK4	LZTS2	1	9.10239e-11	4.74768e-05	0.68551	DnaJC11_1
P27635	RPL10	1	9.10239e-11	4.71215e-05	0.68551	DnaJC11_1
Q9P2X0	DPM3	1	9.10239e-11	4.60805e-05	0.68551	DnaJC11_1
P51149	RAB7A	1	9.10239e-11	4.59754e-05	0.68551	DnaJC11_1
P61803	DAD1	1	9.10239e-11	4.56159e-05	0.68551	DnaJC11_3
Q9Y5M8	SRPRB	1	9.10239e-11	4.54968e-05	0.68551	DnaJC11_1
O60506	SYNCRIP	1	9.10239e-11	4.52358e-05	0.68551	DnaJC11_3
P07195	LDHB	1	9.10239e-11	4.45675e-05	0.68551	DnaJC11_1
P63244	GNB2L1	1	9.10239e-11	4.33343e-05	0.68551	DnaJC11_3
P55209	NAP1L1	1	9.10239e-11	4.27721e-05	0.68551	DnaJC11_1
O75964	ATP5L	1	9.10239e-11	4.26745e-05	0.68551	DnaJC11_3
O43169	CYB5B	1	9.10239e-11	4.23889e-05	0.68551	DnaJC11_1
O14925	TIMM23	1	9.10239e-11	4.21817e-05	0.68551	DnaJC11_1
Q6STE5	SMARCD3	1	9.10239e-11	4.12521e-05	0.68551	DnaJC11_3
O75396	SEC22B	1	9.10239e-11	4.03795e-05	0.68551	DnaJC11_1
Q9UNE7	STUB1	1	9.10239e-11	4.03293e-05	0.68551	DnaJC11_1
O96008	TOMM40	1	9.10239e-11	4.03172e-05	0.68551	DnaJC11_1
Q8N960	CEP120	1	9.10239e-11	3.95943e-05	0.68551	DnaJC11_1
P13667	PDIA4	1	9.10239e-11	3.9112e-05	0.68551	DnaJC11_3
O75916	RGS9	1	9.10239e-11	3.81136e-05	0.68551	DnaJC11_3
P04181	OAT	1	9.10239e-11	3.79717e-05	0.68551	DnaJC11_1
Q92785	DPF2	1	9.10239e-11	3.78833e-05	0.68551	DnaJC11_2
P00387	CYB5R3	1	9.10239e-11	3.77144e-05	0.68551	DnaJC11_1
P61020	RAB5B	1	9.10239e-11	3.73259e-05	0.68551	DnaJC11_1
P23526	AHCY	1	9.10239e-11	3.73036e-05	0.68551	DnaJC11_3
Q6NSJ2	PHLDB3	1	9.10239e-11	3.64577e-05	0.68551	DnaJC11_3
Q969E4	TCEAL6	1	9.10239e-11	3.62176e-05	0.68551	DnaJC11_1
Q9UL15	BAG5	1	9.10239e-11	3.60351e-05	0.68551	DnaJC11_1
Q04760	GLO1	1	9.10239e-11	3.48977e-05	0.68551	DnaJC11_3
P48556	PSMD8	1	9.10239e-11	3.38318e-05	0.68551	DnaJC11_3
P55786	NPEPPS	1	9.10239e-11	3.37253e-05	0.68551	DnaJC11_1
P04844	RPN2	1	9.10239e-11	3.36923e-05	0.68551	DnaJC11_1
P11532	DMD	1	9.10239e-11	3.34316e-05	0.68551	DnaJC11_3
Q53GQ0	HSD17B12	1	9.10239e-11	3.33413e-05	0.68551	DnaJC11_1
Q9UNL2	SSR3	1	9.10239e-11	3.33249e-05	0.68551	DnaJC11_1
Q13642	FHL1	1	9.10239e-11	3.33144e-05	0.68551	DnaJC11_3
Q15836	VAMP3	1	9.10239e-11	3.30943e-05	0.68551	DnaJC11_1
Q9UJZ1	STOML2	1	9.10239e-11	3.30687e-05	0.68551	DnaJC11_1
Q12906	ILF3	1	9.10239e-11	3.30453e-05	0.68551	DnaJC11_3
P46779	RPL28	1	9.10239e-11	3.26059e-05	0.68551	DnaJC11_1
Q400G9	AMZ1	1	9.10239e-11	3.19177e-05	0.68551	DnaJC11_1
Q14498	RBM39	1	9.10239e-11	3.13169e-05	0.68551	DnaJC11_1
P26599	PTBP1	1	9.10239e-11	3.06095e-05	0.68551	DnaJC11_3
P39023	RPL3	1	9.10239e-11	3.04866e-05	0.68551	DnaJC11_1
O14654	IRS4	1	9.10239e-11	3.04816e-05	0.68551	DnaJC11_1
P16615	ATP2A2	1	9.10239e-11	3.03079e-05	0.68551	DnaJC11_1
Q14739	LBR	1	9.10239e-11	3.00547e-05	0.68551	DnaJC11_1
P18085	ARF4	1	9.10239e-11	2.97609e-05	0.68551	DnaJC11_1
Q15417	CNN3	1	9.10239e-11	2.92948e-05	0.68551	DnaJC11_3
P09874	PARP1	1	9.10239e-11	2.90127e-05	0.68551	DnaJC11_3
Q96GZ6-7	SLC41A3	1	9.10239e-11	2.8861e-05	0.68551	DnaJC11_1
Q96A26	FAM162A	1	9.10239e-11	2.84355e-05	0.68551	DnaJC11_1
P31153	MAT2A	1	9.10239e-11	2.81144e-05	0.68551	DnaJC11_3
O95298	NDUFC2	1	9.10239e-11	2.79355e-05	0.68551	DnaJC11_1
Q9NVJ2	ARL8B	1	9.10239e-11	2.73605e-05	0.68551	DnaJC11_1
P53985	SLC16A1	1	9.10239e-11	2.60938e-05	0.68551	DnaJC11_1
Q5TC82	RC3H1	1	9.10239e-11	2.50007e-05	0.68551	DnaJC11_3
Q9NQ92	COPRS	1	9.10239e-11	2.43376e-05	0.68551	DnaJC11_1
P52597	HNRNPF	1	9.10239e-11	2.40242e-05	0.68551	DnaJC11_1
P05546	SERPIND1	1	9.10239e-11	2.39159e-05	0.68551	DnaJC11_1
P02774	GC	1	9.10239e-11	2.37832e-05	0.68551	DnaJC11_3
P61081	UBE2M	1	9.10239e-11	2.34022e-05	0.68551	DnaJC11_3
P22736	NR4A1	1	9.10239e-11	2.32438e-05	0.68551	DnaJC11_1
Q13263	TRIM28	1	9.10239e-11	2.31502e-05	0.68551	DnaJC11_3
P07197	NEFM	1	9.10239e-11	2.27176e-05	0.68551	DnaJC11_3
Q9Y3A6	TMED5	1	9.10239e-11	2.26643e-05	0.68551	DnaJC11_1
P24539	ATP5F1	1	9.10239e-11	2.20784e-05	0.68551	DnaJC11_1
P09871	C1S	1	9.10239e-11	2.19058e-05	0.68551	DnaJC11_3
P35249	RFC4	1	9.10239e-11	2.14439e-05	0.68551	DnaJC11_3
Q9Y4D7	PLXND1	1	9.10239e-11	2.07758e-05	0.68551	DnaJC11_3
P12490	env	1	9.10239e-11	2.04909e-05	0.68551	DnaJC11_3
O00410	IPO5	1	9.10239e-11	2.02863e-05	0.68551	DnaJC11_1
Q13509	TUBB3	1	9.10239e-11	2.02046e-05	0.68551	DnaJC11_1
P52292	KPNA2	1	9.10239e-11	2.01013e-05	0.68551	DnaJC11_1
P51572	BCAP31	1	9.10239e-11	2.00498e-05	0.68551	DnaJC11_3
P67812	SEC11A	1	9.10239e-11	1.97175e-05	0.68551	DnaJC11_1
P00403	MT-CO2	1	9.10239e-11	1.9627e-05	0.68551	DnaJC11_1
P01876	IGHA1	1	9.10239e-11	1.92767e-05	0.68551	DnaJC11_1
O60762	DPM1	1	9.10239e-11	1.92721e-05	0.68551	DnaJC11_1
O94905	ERLIN2	1	9.10239e-11	1.86569e-05	0.68551	DnaJC11_3
P24043	LAMA2	1	9.10239e-11	1.81115e-05	0.68551	DnaJC11_1
P11177	PDHB	1	9.10239e-11	1.80601e-05	0.68551	DnaJC11_1
Q9UL25	RAB21	1	9.10239e-11	1.72875e-05	0.68551	DnaJC11_1
Q6ZRK6	CCDC73	1	9.10239e-11	1.70705e-05	0.68551	DnaJC11_1
Q4KMZ1	IQCC	1	9.10239e-11	1.70356e-05	0.68551	DnaJC11_1
P49755	TMED10	1	9.10239e-11	1.70001e-05	0.68551	DnaJC11_3
O95373	IPO7	1	9.10239e-11	1.63774e-05	0.68551	DnaJC11_1
Q96CS3	FAF2	1	9.10239e-11	1.63353e-05	0.68551	DnaJC11_1
P61026	RAB10	1	9.10239e-11	1.63178e-05	0.68551	DnaJC11_1
Q969M3	YIPF5	1	9.10239e-11	1.61911e-05	0.68551	DnaJC11_1
O00748	CES2	1	9.10239e-11	1.59111e-05	0.68551	DnaJC11_1
Q15125	EBP	1	9.10239e-11	1.58141e-05	0.68551	DnaJC11_1
Q13310	PABPC4	1	9.10239e-11	1.55831e-05	0.68551	DnaJC11_3
Q8N2N9	ANKRD36B	1	9.10239e-11	1.5456e-05	0.68551	DnaJC11_3
Q14444	CAPRIN1	1	9.10239e-11	1.54338e-05	0.68551	DnaJC11_3
P16989	YBX3	1	9.10239e-11	1.52573e-05	0.68551	DnaJC11_1
Q9UIG0	BAZ1B	1	9.10239e-11	1.52494e-05	0.68551	DnaJC11_3
P46977	STT3A	1	9.10239e-11	1.50964e-05	0.68551	DnaJC11_1
P0DOX5	IGHG1	1	9.10239e-11	1.47908e-05	0.68551	DnaJC11_1
Q9UBM7	DHCR7	1	9.10239e-11	1.47334e-05	0.68551	DnaJC11_1
Q9NVI7	ATAD3A	1	9.10239e-11	1.44288e-05	0.68551	DnaJC11_3
P11310	ACADM	1	9.10239e-11	1.43636e-05	0.68551	DnaJC11_1
P01111	NRAS	1	9.10239e-11	1.43039e-05	0.68551	DnaJC11_1
P33032	MC5R	1	9.10239e-11	1.42247e-05	0.68551	DnaJC11_1
P20888	env	1	9.10239e-11	1.40895e-05	0.68551	DnaJC11_3
Q9UJS0	SLC25A13	1	9.10239e-11	1.39074e-05	0.68551	DnaJC11_1
Q7L5D6	GET4	1	9.10239e-11	1.38545e-05	0.68551	DnaJC11_1
Q9BUN8	DERL1	1	9.10239e-11	1.38403e-05	0.68551	DnaJC11_1
Q53H12	AGK	1	9.10239e-11	1.38235e-05	0.68551	DnaJC11_3
P43490	NAMPT	1	9.10239e-11	1.35211e-05	0.68551	DnaJC11_3
A6NHL2	TUBAL3	1	9.10239e-11	1.33141e-05	0.68551	DnaJC11_1
Q16576	RBBP7	1	9.10239e-11	1.31048e-05	0.68551	DnaJC11_3
O75323	GBAS	1	9.10239e-11	1.29947e-05	0.68551	DnaJC11_3
P30153	PPP2R1A	1	9.10239e-11	1.26755e-05	0.68551	DnaJC11_1
Q8V7J0	ORF1	1	9.10239e-11	1.23704e-05	0.68551	DnaJC11_1
P09543	CNP	1	9.10239e-11	1.23399e-05	0.68551	DnaJC11_1
P19823	ITIH2	1	9.10239e-11	1.21651e-05	0.68551	DnaJC11_3
Q9QSP0	L	1	9.10239e-11	1.21037e-05	0.68551	DnaJC11_1
Q9NRF8	CTPS1	1	9.10239e-11	1.18938e-05	0.68551	DnaJC11_1
P14625	HSP90B1	1	9.10239e-11	1.14438e-05	0.68551	DnaJC11_1
Q66K41	ZNF385C	1	9.10239e-11	1.1414e-05	0.68551	DnaJC11_1
Q9BUF5	TUBB6	1	9.10239e-11	1.12453e-05	0.68551	DnaJC11_1
Q7L622	G2E3	1	9.10239e-11	1.10918e-05	0.68551	DnaJC11_3
P40939	HADHA	1	9.10239e-11	1.09065e-05	0.68551	DnaJC11_3
B2C4J3	L	1	9.10239e-11	1.07288e-05	0.68551	DnaJC11_3
P20042	EIF2S2	1	9.10239e-11	1.03154e-05	0.68551	DnaJC11_3
Q9BVA1	TUBB2B	1	9.10239e-11	9.95419e-06	0.68551	DnaJC11_1
Q14315	FLNC	1	9.10239e-11	9.88719e-06	0.68551	DnaJC11_1
P29323	EPHB2	1	9.10239e-11	9.86923e-06	0.68551	DnaJC11_3
Q96P70	IPO9	1	9.10239e-11	9.81034e-06	0.68551	DnaJC11_1
O95232	LUC7L3	1	9.10239e-11	9.77422e-06	0.68551	DnaJC11_1
Q13148	TARDBP	1	9.10239e-11	9.5972e-06	0.68551	DnaJC11_1
P53007	SLC25A1	1	9.10239e-11	9.03609e-06	0.68551	DnaJC11_1
Q5SWX8	ODR4	1	9.10239e-11	8.85267e-06	0.68551	DnaJC11_1
Q96A33	CCDC47	1	9.10239e-11	8.80689e-06	0.68551	DnaJC11_1
P46379	BAG6	1	9.10239e-11	8.75173e-06	0.68551	DnaJC11_1
P57678	GEMIN4	1	9.10239e-11	8.7229e-06	0.68551	DnaJC11_1
Q9Y5V3	MAGED1	1	9.10239e-11	8.58977e-06	0.68551	DnaJC11_1
Q99873	PRMT1	1	9.10239e-11	8.43675e-06	0.68551	DnaJC11_1
P12956	XRCC6	1	9.10239e-11	8.30729e-06	0.68551	DnaJC11_3
Q9HCK5	AGO4	1	9.10239e-11	8.09597e-06	0.68551	DnaJC11_1
P08195	SLC3A2	1	9.10239e-11	7.84643e-06	0.68551	DnaJC11_1
Q9UQ13	SHOC2	1	9.10239e-11	7.79024e-06	0.68551	DnaJC11_1
O95197	RTN3	1	9.10239e-11	7.55626e-06	0.68551	DnaJC11_1
O14980	XPO1	1	9.10239e-11	7.43442e-06	0.68551	DnaJC11_1
Q9Y3I0	RTCB	1	9.10239e-11	7.20949e-06	0.68551	DnaJC11_3
P33993	MCM7	1	9.10239e-11	7.0113e-06	0.68551	DnaJC11_1
Q86VP6	CAND1	1	9.10239e-11	6.87435e-06	0.68551	DnaJC11_1
O95831	AIFM1	1	9.10239e-11	6.84721e-06	0.68551	DnaJC11_1
Q9H422	HIPK3	1	9.10239e-11	6.5646e-06	0.68551	DnaJC11_1
P23458	JAK1	1	9.10239e-11	6.45056e-06	0.68551	DnaJC11_1
Q15393	SF3B3	1	9.10239e-11	6.41151e-06	0.68551	DnaJC11_3
O95757	HSPA4L	1	9.10239e-11	6.39365e-06	0.68551	DnaJC11_1
P55060	CSE1L	1	9.10239e-11	6.06574e-06	0.68551	DnaJC11_3
P02786	TFRC	1	9.10239e-11	6.0518e-06	0.68551	DnaJC11_1
Q9Y5A9	YTHDF2	1	9.10239e-11	5.95192e-06	0.68551	DnaJC11_1
Q00610	CLTC	1	9.10239e-11	5.94861e-06	0.68551	DnaJC11_1
P03072	N_A	1	9.10239e-11	5.59203e-06	0.68551	DnaJC11_1
P56192	MARS	1	9.10239e-11	5.46523e-06	0.68551	DnaJC11_1
Q9UIF8	BAZ2B	1	9.10239e-11	5.26729e-06	0.68551	DnaJC11_3
Q13200	PSMD2	1	9.10239e-11	5.16803e-06	0.68551	DnaJC11_1
Q16531	DDB1	1	9.10239e-11	5.01459e-06	0.68551	DnaJC11_1
Q9UQE7	SMC3	1	9.10239e-11	4.97605e-06	0.68551	DnaJC11_3
Q9NRZ9	HELLS	1	9.10239e-11	4.96517e-06	0.68551	DnaJC11_1
P34932	HSPA4	1	9.10239e-11	4.77909e-06	0.68551	DnaJC11_1
O43592	XPOT	1	9.10239e-11	4.60193e-06	0.68551	DnaJC11_3
P08243	ASNS	1	9.10239e-11	4.58501e-06	0.68551	DnaJC11_1
P41252	IARS	1	9.10239e-11	4.27585e-06	0.68551	DnaJC11_1
Q9H3C7	GGNBP2	1	9.10239e-11	4.16051e-06	0.68551	DnaJC11_3
P43243	MATR3	1	9.10239e-11	3.92517e-06	0.68551	DnaJC11_1
Q9UPN7	PPP6R1	1	9.10239e-11	3.84201e-06	0.68551	DnaJC11_1
P18799	env	1	9.10239e-11	3.73819e-06	0.68551	DnaJC11_3
O75419	CDC45	1	9.10239e-11	3.56444e-06	0.68551	DnaJC11_1
P11586	MTHFD1	1	9.10239e-11	3.49762e-06	0.68551	DnaJC11_1
P07814	EPRS	1	9.10239e-11	3.42393e-06	0.68551	DnaJC11_1
Q9H8Y8	GORASP2	1	9.10239e-11	3.38841e-06	0.68551	DnaJC11_1
O95202	LETM1	1	9.10239e-11	3.08943e-06	0.68551	DnaJC11_1
Q9HAV4	XPO5	1	9.10239e-11	2.94598e-06	0.68551	DnaJC11_1
Q9Y4W6	AFG3L2	1	9.10239e-11	2.87347e-06	0.68551	DnaJC11_1
O94808	GFPT1	1	9.10239e-11	2.8509e-06	0.68551	DnaJC11_1
Q86YV5	SGK223	1	9.10239e-11	2.80805e-06	0.68551	DnaJC11_1
P27708	CAD	1	9.10239e-11	2.78961e-06	0.68551	DnaJC11_1
O75643	SNRNP200	1	9.10239e-11	2.47963e-06	0.68551	DnaJC11_1
Q86Y13	DZIP3	1	9.10239e-11	2.28593e-06	0.68551	DnaJC11_3
Q14574	DSC3	1	9.10239e-11	1.90407e-06	0.68551	DnaJC11_1
P29837	N_A	1	9.10239e-11	1.59563e-06	0.68551	DnaJC11_3
P78527	PRKDC	0.859187	0.306986	7.14625e-05	0.683696	DnaJC11_1,DnaJC11_3
P40227	CCT6A	0.787075	0.46637	0.000483457	0.68344	DnaJC11_1,DnaJC11_3
P78371	CCT2	0.789672	0.45159	0.000168402	0.680658	DnaJC11_1,DnaJC11_3
O00571	DDX3X	0.708253	0.622793	0.000233017	0.677667	DnaJC11_1,DnaJC11_3
P38646	HSPA9	0.781471	0.459717	0.000608256	0.677546	DnaJC11_1,DnaJC11_3
Q9BQA1	WDR77	0.607728	0.831434	0.0139359	0.673209	DnaJC11_1,DnaJC11_2,DnaJC11_3
P15880	RPS2	0.71206	0.565307	0.000473951	0.662541	DnaJC11_1,DnaJC11_3
P81605	DCD	0.72936	0.518445	0.00318472	0.659958	DnaJC11_1,DnaJC11_3
Q9NXV2	KCTD5	0.685931	0.601939	0.005063	0.655959	DnaJC11_1,DnaJC11_3
P62269	RPS18	0.698982	0.572437	0.00422185	0.655798	DnaJC11_1,DnaJC11_3
P62987	UBA52	0.599745	0.777919	0.0373398	0.651365	DnaJC11_1,DnaJC11_2,DnaJC11_3
P31943	HNRNPH1	0.658758	0.629367	0.000531977	0.645767	DnaJC11_1,DnaJC11_3
P84103	SRSF3	0.658433	0.612717	0.000837202	0.640409	DnaJC11_1,DnaJC11_3
P14618	PKM	0.807722	0.279432	0.000491162	0.639918	DnaJC11_1,DnaJC11_3
P11940	PABPC1	0.717269	0.472158	0.000408265	0.637372	DnaJC11_1,DnaJC11_3
P11021	HSPA5	0.72389	0.451872	0.000223919	0.635651	DnaJC11_1,DnaJC11_3
Q9Y3U8	RPL36	0.755864	0.379204	0.000767226	0.635153	DnaJC11_1,DnaJC11_3
P42766	RPL35	0.922382	9.10239e-11	0.00468982	0.63233	DnaJC11_3
Q06830	PRDX1	0.601616	0.70959	0.0116709	0.631413	DnaJC11_1,DnaJC11_2,DnaJC11_3
O95816	BAG2	0.918931	9.10239e-11	0.000671172	0.629941	DnaJC11_3
P62241	RPS8	0.630156	0.62285	0.000415848	0.624149	DnaJC11_1,DnaJC11_3
P06748	NPM1	0.734505	0.386668	0.00241164	0.622823	DnaJC11_1,DnaJC11_3
P63173	RPL38	0.677665	0.503505	0.00167658	0.619903	DnaJC11_1,DnaJC11_3
P60866	RPS20	0.669156	0.5207	0.0047906	0.619393	DnaJC11_1,DnaJC11_3
P18124	RPL7	0.631794	0.598911	0.000507194	0.617886	DnaJC11_1,DnaJC11_3
Q7L7L0	HIST3H2A	0.736755	0.36078	0.00426955	0.61639	DnaJC11_1,DnaJC11_3
P83731	RPL24	0.665533	0.51694	0.000504518	0.615724	DnaJC11_1,DnaJC11_3
P62701	RPS4X	0.671499	0.499624	0.000627282	0.614472	DnaJC11_1,DnaJC11_3
P62424	RPL7A	0.708498	0.406593	0.000625148	0.611132	DnaJC11_1,DnaJC11_3
P09651	HNRNPA1	0.891483	9.10239e-11	0.000380525	0.611123	DnaJC11_3
Q07020	RPL18	0.62003	0.598231	0.000533234	0.609612	DnaJC11_1,DnaJC11_3
P07437	TUBB	0.599299	0.619377	0.00254732	0.601937	DnaJC11_1,DnaJC11_3
A2NJV5	IGKV2-29	0.434214	0.954487	0.4391	0.594763	DnaJC11_1,DnaJC11_2,DnaJC11_3
Q00839	HNRNPU	0.635793	0.514849	0.000447101	0.594692	DnaJC11_1,DnaJC11_3
O14744	PRMT5	0.465294	0.886139	0.0174056	0.592468	DnaJC11_1,DnaJC11_2,DnaJC11_3
P61254	RPL26	0.719794	0.307161	0.00264457	0.58821	DnaJC11_1,DnaJC11_3
P98175	RBM10	0.58816	0.593432	0.000198292	0.586282	DnaJC11_1,DnaJC11_3
P62899	RPL31	0.707136	0.326887	0.00255919	0.585619	DnaJC11_1,DnaJC11_3
Q9BRS2	RIOK1	0.582266	0.60335	0.000234425	0.585302	DnaJC11_1,DnaJC11_3
Q07955	SRSF1	0.576305	0.598179	0.000430816	0.579622	DnaJC11_1,DnaJC11_3
P19338	NCL	0.699594	0.313386	0.00137967	0.576276	DnaJC11_1,DnaJC11_3
P25789	PSMA4	0.704178	0.303092	0.00250326	0.576249	DnaJC11_1,DnaJC11_3
Q92522	H1FX	0.697016	0.317742	0.000982478	0.57585	DnaJC11_1,DnaJC11_3
P23588	EIF4B	0.742207	0.197681	0.00158116	0.56979	DnaJC11_1,DnaJC11_3
P62805	HIST1H4A	0.6534	0.353223	0.00605711	0.556928	DnaJC11_1,DnaJC11_3
P07355	ANXA2	0.709885	0.206542	0.000602135	0.550361	DnaJC11_1,DnaJC11_3
P04406	GAPDH	0.639035	0.35221	0.000637012	0.546736	DnaJC11_1,DnaJC11_3
P08670	VIM	0.499495	0.660474	0.0124836	0.546259	DnaJC11_1,DnaJC11_2,DnaJC11_3
P03246	N_A	0.79592	9.10239e-11	0.000174923	0.545612	DnaJC11_3
O00231	PSMD11	0.795041	9.10239e-11	0.000110173	0.545009	DnaJC11_3
Q9Y2W1	THRAP3	0.644383	0.328804	0.000318159	0.543179	DnaJC11_1,DnaJC11_3
P0C0L4	C4A	0.788602	9.10239e-11	0.000188304	0.540596	DnaJC11_3
P84090	ERH	0.670414	0.262058	0.00598871	0.540464	DnaJC11_1,DnaJC11_3
Q14681	KCTD2	0.515262	0.604484	0.000884449	0.539724	DnaJC11_1,DnaJC11_3
P04114	APOB	0.771194	9.10239e-11	0.00010752	0.528662	DnaJC11_3
P02652	APOA2	0.76438	9.10239e-11	0.00103202	0.523996	DnaJC11_3
Q99880	HIST1H2BL	0.754563	9.10239e-11	0.00271491	0.517277	DnaJC11_3
P01011	SERPINA3	0.754407	9.10239e-11	0.0001543	0.517155	DnaJC11_3
P39019	RPS19	0.643716	0.24483	0.0036712	0.516833	DnaJC11_1,DnaJC11_3
Q9Y657	SPIN1	0.573334	0.386641	0.00117468	0.512323	DnaJC11_1,DnaJC11_3
P62750	RPL23A	0.744918	9.10239e-11	0.00229105	0.510662	DnaJC11_3
P05455	SSB	0.740734	9.10239e-11	0.000102283	0.507781	DnaJC11_3
P08238	HSP90AB1	0.468647	0.603758	0.00109802	0.507546	DnaJC11_1,DnaJC11_3
P62258	YWHAE	0.739835	9.10239e-11	0.000134963	0.507165	DnaJC11_3
P68871	HBB	0.739161	9.10239e-11	0.000316878	0.506704	DnaJC11_3
Q9Y230	RUVBL2	0.735681	9.10239e-11	0.000132116	0.504318	DnaJC11_3
P63104	YWHAZ	0.735369	9.10239e-11	0.000123366	0.504103	DnaJC11_3
P02753	RBP4	0.727959	9.10239e-11	0.000265853	0.499025	DnaJC11_3
P02787	TF	0.725549	9.10239e-11	0.00585734	0.497406	DnaJC11_3
P52272	HNRNPM	0.721864	9.10239e-11	5.16183e-05	0.494845	DnaJC11_1
P52732	KIF11	0.534864	0.396567	0.00471083	0.489035	DnaJC11_1,DnaJC11_3
P23246	SFPQ	0.713164	9.10239e-11	0.000293903	0.488883	DnaJC11_3
P55157	MTTP	0.711874	9.10239e-11	0.000145704	0.487998	DnaJC11_3
P61247	RPS3A	0.710913	9.10239e-11	0.000344654	0.48734	DnaJC11_3
Q6IS14	EIF5AL1	0.709986	9.10239e-11	0.000477998	0.486706	DnaJC11_3
P23528	CFL1	0.707311	9.10239e-11	0.000262899	0.484871	DnaJC11_3
P61353	RPL27	0.706644	9.10239e-11	0.000756324	0.484416	DnaJC11_3
P02679	FGG	0.705279	9.10239e-11	0.000348256	0.483478	DnaJC11_3
P01009	SERPINA1	0.703388	9.10239e-11	0.00134938	0.482188	DnaJC11_3
Q13347	EIF3I	0.702363	9.10239e-11	0.00016936	0.481478	DnaJC11_3
P10809	HSPD1	0.702068	9.10239e-11	0.000177326	0.481275	DnaJC11_3
P02647	APOA1	0.700766	9.10239e-11	0.000834122	0.480387	DnaJC11_3
Q08554	DSC1	0.698213	9.10239e-11	7.23717e-05	0.478632	DnaJC11_3
Q15717	ELAVL1	0.697788	9.10239e-11	8.6963e-05	0.478341	DnaJC11_3
P01024	C3	0.69684	9.10239e-11	0.000373035	0.477693	DnaJC11_3
P62263	RPS14	0.696611	9.10239e-11	0.000341879	0.477536	DnaJC11_1
P48047	ATP5O	0.69445	9.10239e-11	0.000106509	0.476053	DnaJC11_3
P02790	HPX	0.693082	9.10239e-11	0.000451798	0.475118	DnaJC11_3
Q15233	NONO	0.689333	9.10239e-11	0.000147656	0.472545	DnaJC11_3
Q9Y224	C14orf166	0.68858	9.10239e-11	0.000126643	0.472029	DnaJC11_3
P37802	TAGLN2	0.684647	9.10239e-11	0.000138052	0.469333	DnaJC11_3
O43390	HNRNPR	0.684527	9.10239e-11	7.84509e-05	0.469251	DnaJC11_3
P32119	PRDX2	0.683722	9.10239e-11	0.000550574	0.468701	DnaJC11_3
P02763	ORM1	0.682789	9.10239e-11	0.000870178	0.468064	DnaJC11_3
Q16875	PFKFB3	0.676403	9.10239e-11	4.04188e-05	0.463681	DnaJC11_3
O75821	EIF3G	0.675118	9.10239e-11	9.15911e-05	0.462801	DnaJC11_3
P55884	EIF3B	0.67084	9.10239e-11	4.05287e-05	0.459868	DnaJC11_3
P21333	FLNA	0.669809	9.10239e-11	5.28692e-05	0.459161	DnaJC11_3
Q12905	ILF2	0.669698	9.10239e-11	9.97168e-05	0.459085	DnaJC11_3
P02675	FGB	0.66941	9.10239e-11	0.000112134	0.458888	DnaJC11_3
O43242	PSMD3	0.669009	9.10239e-11	4.41885e-05	0.458612	DnaJC11_3
P07910	HNRNPC	0.665748	9.10239e-11	0.000335534	0.456379	DnaJC11_3
O75688	PPM1B	0.416992	0.54524	0.00122348	0.454082	DnaJC11_1,DnaJC11_3
P00738	HP	0.662307	9.10239e-11	0.00630807	0.454056	DnaJC11_3
P62917	RPL8	0.661999	9.10239e-11	0.000573319	0.45381	DnaJC11_3
P63162	SNRPB	0.6538	9.10239e-11	0.000782874	0.448191	DnaJC11_3
Q86V81	ALYREF	0.65292	9.10239e-11	0.000980485	0.447589	DnaJC11_3
P62851	RPS25	0.652123	9.10239e-11	0.00268908	0.447053	DnaJC11_3
P47756	CAPZB	0.644954	9.10239e-11	0.000108106	0.442123	DnaJC11_3
Q9Y2Q9	MRPS28	0.64165	9.10239e-11	0.000103209	0.439858	DnaJC11_3
P00918	CA2	0.638729	9.10239e-11	0.00031073	0.437857	DnaJC11_3
Q13442	PDAP1	0.631895	9.10239e-11	0.000240669	0.433172	DnaJC11_3
Q13813	SPTAN1	0.630563	9.10239e-11	3.43625e-05	0.432257	DnaJC11_3
P00450	CP	0.628394	9.10239e-11	0.000165107	0.430771	DnaJC11_3
P17844	DDX5	0.618196	9.10239e-11	5.94483e-05	0.42378	DnaJC11_3
P14866	HNRNPL	0.61714	9.10239e-11	0.000111438	0.423056	DnaJC11_3
P62857	RPS28	0.611681	9.10239e-11	0.00218231	0.419326	DnaJC11_3
Q02878	RPL6	0.594598	9.10239e-11	0.000178606	0.407604	DnaJC11_3
P62314	SNRPD1	0.582086	9.10239e-11	0.000712442	0.39903	DnaJC11_3
P61978	HNRNPK	0.382571	0.437147	0.00095541	0.397135	DnaJC11_1,DnaJC11_3
P62318	SNRPD3	0.578094	9.10239e-11	0.00253827	0.396305	DnaJC11_3
P01008	SERPINC1	0.57196	9.10239e-11	9.36688e-05	0.392085	DnaJC11_3
P07951	TPM3	0.570065	9.10239e-11	0.000395082	0.390787	DnaJC11_3
P19474	TRIM21	0.556981	9.10239e-11	6.27831e-05	0.381817	DnaJC11_1
P14923	JUP	0.553657	9.10239e-11	9.46098e-05	0.379538	DnaJC11_3
Q6P3W7	SCYL2	0.535946	9.10239e-11	2.86139e-05	0.367397	DnaJC11_1
P61604	HSPE1	0.534695	9.10239e-11	0.000558756	0.366542	DnaJC11_3
P13639	EEF2	0.533631	9.10239e-11	2.08958e-05	0.365809	DnaJC11_3
Q9NZI8	IGF2BP1	0.515407	9.10239e-11	4.25882e-05	0.353317	DnaJC11_1
O43143	DHX15	0.511833	9.10239e-11	1.14575e-05	0.350866	DnaJC11_1
P15924	DSP	0.49113	9.10239e-11	2.36002e-05	0.336675	DnaJC11_3
P38159	RBMX	0.408832	0.182686	0.00111035	0.336629	DnaJC11_1,DnaJC11_3
P67809	YBX1	0.311263	0.338588	0.00250005	0.317854	DnaJC11_1,DnaJC11_3
Q08188	TGM3	0.4633	9.10239e-11	3.62211e-05	0.317597	DnaJC11_3
P06454	PTMA	0.461137	9.10239e-11	0.00179727	0.316125	DnaJC11_3
P31944	CASP14	0.451639	9.10239e-11	0.000161262	0.309604	DnaJC11_1
P35580	MYH10	0.432877	9.10239e-11	4.20705e-05	0.296742	DnaJC11_3
Q8N5Z5	KCTD17	0.401906	9.10239e-11	0.000221595	0.275512	DnaJC11_1
P01023	A2M	0.384074	9.10239e-11	9.77817e-05	0.263287	DnaJC11_3
P01040	CSTA	0.359376	9.10239e-11	0.000368977	0.246358	DnaJC11_3
P62316	SNRPD2	0.359	9.10239e-11	0.0033302	0.246118	DnaJC11_3
P54105	CLNS1A	0.355824	9.10239e-11	0.000217612	0.243922	DnaJC11_1
Q9HAY2	MAGEF1	0.203644	9.10239e-11	0.0127537	0.139676	DnaJC11_1
P35579	MYH9	0.197241	9.10239e-11	0.000257008	0.135212	DnaJC11_3
Q02413	DSG1	0.192383	9.10239e-11	0.000111271	0.131881	DnaJC11_3
P07900	HSP90AA1	0.0877684	9.10239e-11	2.7712e-05	0.0601663	DnaJC11_1

## Sheet: Supplementary Table S5
Table S5: LFQ values for proteins that co-immunoprecipitated with DNAJC11ΔDUF-FLAG in HEK293 cells identified by LC-MS/MS analysis after quantification with MaxQuant program in gene name alphabetical order.
LFQ intensity DNaJC11_DDUF_IP_1	LFQ intensity DNaJC11_DDUF_IP_2	LFQ intensity DNaJC11_DDUF_IP_3	LFQ intensity Negative control_1	LFQ intensity Negative control_2	LFQ intensity Negative control_3	N: N: Peptides	N: N: Razor + unique peptides	N: N: Unique peptides	N: N: Sequence coverage [%]	N: N: Unique + razor sequence coverage [%]	N: N: Unique sequence coverage [%]	N: N: Mol. weight [kDa]	N: N: Q-value	N: N: Score	N: N: Intensity	N: N: MS/MS count	T: T: Protein IDs	T: T: Majority protein IDs	T: T: Protein names	T: T: Gene names
0	0	1808700	0	0	5858800	5	5	5	5.9	5.9	5.9	163.29	0	92.724	7959100	62	P01023;P20742-2;P20742	P01023	Alpha-2-macroglobulin	A2M
0	0	0	0	0	0	1	1	1	0.8	0.8	0.8	191.36	0.028369	0.9091	0	1	Q99758	Q99758	ATP-binding cassette sub-family A member 3	ABCA3
5787000	0	0	0	0	0	1	1	1	4.9	4.9	4.9	40.326	0.052419	0.56727	5787000	1	Q9H6R3-2;Q9H6R3	Q9H6R3-2;Q9H6R3	Acyl-CoA synthetase short-chain family member 3, mitochondrial	ACSS3
0	0	0	379690	0	0	6	1	1	19.4	4.2	4.2	42.051	0.0086957	1.0812	1330400	1	P68133;P68032;P63267;P62736	P68133;P68032;P63267;P62736	Actin, alpha skeletal muscle;Actin, alpha cardiac muscle 1;Actin, gamma-enteric smooth muscle;Actin, aortic smooth muscle	ACTA1;ACTC1;ACTG2;ACTA2
0	0	0	291340	0	0	10	1	1	38.7	4.5	4.5	41.736	0.0083333	1.0717	551060	1	P60709;Q6S8J3;P63267-2;Q9BYX7;Q562R1	P60709;Q6S8J3	Actin, cytoplasmic 1;Actin, cytoplasmic 1, N-terminally processed;POTE ankyrin domain family member E	ACTB;POTEE
12626000	0	0	7883900	0	0	10	10	1	38.7	38.7	4.5	41.792	0	73.11	19080000	16	P63261	P63261	Actin, cytoplasmic 2;Actin, cytoplasmic 2, N-terminally processed	ACTG1
1025400	0	0	0	0	0	1	1	1	2.3	2.3	2.3	102.71	0.052632	0.56729	1025400	1	P12814-2;P12814;P12814-3;P12814-4	P12814-2;P12814;P12814-3;P12814-4	Alpha-actinin-1	ACTN1
0	0	0	54506	0	0	1	1	1	0.5	0.5	0.5	168.46	0.050725	0.4335	89843	0	P58397-3;P58397	P58397-3;P58397	A disintegrin and metalloproteinase with thrombospondin motifs 12	ADAMTS12
0	0	0	217860	0	0	1	1	1	0.6	0.6	0.6	169.75	1	-2	322410	0	Q96PN6-4;Q96PN6-2;Q96PN6	Q96PN6-4;Q96PN6-2;Q96PN6	Adenylate cyclase type 10	ADCY10
0	0	0	0	0	0	1	1	1	1.4	1.4	1.4	98.204	0.04321	0.75119	0	1	Q9UHB7-2;Q9UHB7	Q9UHB7-2;Q9UHB7	AF4/FMR2 family member 4	AFF4
0	0	0	595640	0	0	1	1	1	0.9	0.9	0.9	172.62	0.022556	0.97023	727140	1	P35573-2;P35573-3;P35573	P35573-2;P35573-3;P35573	Glycogen debranching enzyme;4-alpha-glucanotransferase;Amylo-alpha-1,6-glucosidase	AGL
0	0	0	0	0	3086600	1	1	1	0.8	0.8	0.8	252.5	0.046809	0.5802	23240000	2	Q8WYP5;Q8WYP5-3;Q8WYP5-2	Q8WYP5;Q8WYP5-3;Q8WYP5-2	Protein ELYS	AHCTF1
0	0	0	0	0	161130	1	1	1	0.2	0.2	0.2	447.75	0.048711	0.47876	171760	0	Q99996-5;Q99996-3;Q99996;Q99996-1;Q99996-6	Q99996-5;Q99996-3;Q99996;Q99996-1;Q99996-6	A-kinase anchor protein 9	AKAP9
0	0	0	0	0	0	1	1	1	3.9	3.9	3.9	23.364	0.038889	0.70948	0	3	P42330-2;Q04828;P52895;P42330	P42330-2;Q04828;P52895;P42330	Aldo-keto reductase family 1 member C3;Aldo-keto reductase family 1 member C1;Aldo-keto reductase family 1 member C2	AKR1C3;AKR1C1;AKR1C2
0	0	142130	0	0	0	6	2	2	8.4	3.3	3.3	69.366	0	2.2361	212150	3	CON__P02768-1;P02768;P02768-2;P02768-3	CON__P02768-1;P02768;P02768-2;P02768-3	Serum albumin	ALB
0	0	0	616890	0	0	1	1	1	2.5	2.5	2.5	55.447	0.045662	0.60226	471170	1	Q5I7T1;Q5BKT4	Q5I7T1;Q5BKT4	Putative Dol-P-Glc:Glc(2)Man(9)GlcNAc(2)-PP-Dol alpha-1,2-glucosyltransferase;Dol-P-Glc:Glc(2)Man(9)GlcNAc(2)-PP-Dol alpha-1,2-glucosyltransferase	ALG10B;ALG10
0	0	0	0	0	0	1	1	1	1.6	1.6	1.6	88.197	0.039548	0.71246	0	1	Q01433-3;Q01433-5;Q01433-2;Q01433-4;Q01433	Q01433-3;Q01433-5;Q01433-2;Q01433-4;Q01433	AMP deaminase 2	AMPD2
0	0	0	621560	0	0	1	1	1	6.7	6.7	6.7	31.86	0.037634	0.70197	474740	1	Q400G9-2;Q400G9	Q400G9-2;Q400G9	Archaemetzincin-1	AMZ1
0	0	0	7282600	0	0	1	1	1	0.7	0.7	0.7	233.01	0.050584	0.55823	5562300	2	Q6UB98-2;Q6UB98	Q6UB98-2;Q6UB98	Ankyrin repeat domain-containing protein 12	ANKRD12
0	0	25478	0	0	0	1	1	1	0.7	0.7	0.7	148.31	0.049875	0.43886	38031	0	Q9UPS8-2;Q9UPS8	Q9UPS8-2;Q9UPS8	Ankyrin repeat domain-containing protein 26	ANKRD26
0	0	0	0	0	139570000	1	1	1	0.6	0.6	0.6	210.81	0	2.4438	883360000	12	Q8N7Z5	Q8N7Z5	Putative ankyrin repeat domain-containing protein 31	ANKRD31
0	8626800	0	0	0	0	1	1	1	1.4	1.4	1.4	73.234	0.049505	0.43846	110280	1	Q9Y2G4-4;Q9Y2G4-1;Q9Y2G4-3;Q9Y2G4	Q9Y2G4-4;Q9Y2G4-1;Q9Y2G4-3;Q9Y2G4	Ankyrin repeat domain-containing protein 6	ANKRD6
0	27076000	0	0	0	0	3	3	3	10	10	10	38.604	0	2.2465	346130	3	P07355;A6NMY6;P07355-2	P07355;A6NMY6;P07355-2	Annexin A2;Putative annexin A2-like protein	ANXA2;ANXA2P2
0	0	0	271610	0	0	1	1	1	2.9	2.9	2.9	49.976	0.046296	0.60982	71418000	1	O00189	O00189	AP-4 complex subunit mu-1	AP4M1
0	0	1573900	0	0	5855100	7	7	7	26.2	26.2	26.2	30.777	0	6.1588	5367700	13	P02647	P02647	Apolipoprotein A-I;Proapolipoprotein A-I;Truncated apolipoprotein A-I	APOA1
0	0	0	873320	0	0	1	1	1	3.8	3.8	3.8	66.853	0.047619	0.45054	1495200	1	Q92624	Q92624	Amyloid protein-binding protein 2	APPBP2
0	0	0	0	0	161730	1	1	1	4.7	4.7	4.7	25.356	0.04918	0.57443	390170	1	P05089-3;P05089;P05089-2	P05089-3;P05089;P05089-2	Arginase-1	ARG1
0	0	18572000	0	0	0	1	1	1	9.8	9.8	9.8	12.547	0.044586	0.76908	80784000	3	Q14CB8-4;Q14CB8-6;Q14CB8-7;Q14CB8-3;Q14CB8;Q14CB8-2	Q14CB8-4;Q14CB8-6;Q14CB8-7;Q14CB8-3;Q14CB8;Q14CB8-2	Rho GTPase-activating protein 19	ARHGAP19
30282000	0	0	0	0	0	1	1	1	1.3	1.3	1.3	129.37	0.049763	0.42899	30282000	1	Q5T5U3-3;Q5T5U3	Q5T5U3-3;Q5T5U3	Rho GTPase-activating protein 21	ARHGAP21
515510	0	0	0	0	0	1	1	1	6.5	6.5	6.5	29.462	0.048	0.45231	515510	1	Q7RTU5	Q7RTU5	Achaete-scute homolog 5	ASCL5
0	0	0	55047	0	0	1	1	1	1.3	1.3	1.3	153.82	0.047009	0.58197	350980	1	Q76L83	Q76L83	Putative Polycomb group protein ASXL2	ASXL2
2816500	0	0	0	0	0	1	1	1	3	3	3	32.881	0.048458	0.58934	2816500	0	P36542-2;P36542	P36542-2;P36542	ATP synthase subunit gamma, mitochondrial	ATP5C1
0	0	0	255130	0	0	1	1	1	3.4	3.4	3.4	34.258	0.050542	0.52955	379410	1	P25311	P25311	Zinc-alpha-2-glycoprotein	AZGP1
0	0	0	3518500	0	0	1	1	1	5.2	5.2	5.2	44.714	0.050602	0.43345	10270000	1	O75936	O75936	Gamma-butyrobetaine dioxygenase	BBOX1
0	0	4158800	0	0	0	1	1	1	2.5	2.5	2.5	64.802	0.05614	0.51806	6207900	1	Q9BUH8	Q9BUH8	Brain-enriched guanylate kinase-associated protein	BEGAIN
0	0	0	0	0	240560	1	1	1	0.6	0.6	0.6	145.81	0.048165	0.42326	125170	0	Q14692	Q14692	Ribosome biogenesis protein BMS1 homolog	BMS1
0	0	63398	0	0	0	1	1	1	15.5	15.5	15.5	6.8417	0.053691	0.51251	94636	1	Q9H3K6-2;Q9H3K6	Q9H3K6-2;Q9H3K6	BolA-like protein 2	BOLA2
0	0	0	8347700	0	0	1	1	1	0.3	0.3	0.3	325.12	0.039801	0.64355	6375800	1	Q12830-2;Q12830	Q12830-2;Q12830	Nucleosome-remodeling factor subunit BPTF	BPTF
801310	0	0	0	0	0	1	1	1	4.5	4.5	4.5	32.016	0.04375	0.75536	801310	1	P78410-3;P78410-2;P78410	P78410-3;P78410-2;P78410	Butyrophilin subfamily 3 member A2	BTN3A2
0	0	0	908340	0	0	1	1	1	9.7	9.7	9.7	17.766	0.048148	0.53635	693780	1	Q8N326	Q8N326	Uncharacterized protein C10orf111	C10orf111
0	0	952330	0	0	4764400	5	5	5	5.4	5.4	5.4	187.15	0	7.4867	5736900	9	P01024	P01024	Complement C3;Complement C3 beta chain;C3-beta-c;Complement C3 alpha chain;C3a anaphylatoxin;Acylation stimulating protein;Complement C3b alpha chain;Complement C3c alpha chain fragment 1;Complement C3dg fragment;Complement C3g fragment;Complement C3d fragment;Complement C3f fragment;Complement C3c alpha chain fragment 2	C3
0	0	0	0	0	679040	1	1	1	1.2	1.2	1.2	192.75	0.047872	0.45196	552420	1	P0C0L5;P0C0L4	P0C0L5;P0C0L4	Complement C4-B;Complement C4 beta chain;Complement C4-B alpha chain;C4a anaphylatoxin;C4b-B;C4d-B;Complement C4 gamma chain;Complement C4-A;Complement C4 beta chain;Complement C4-A alpha chain;C4a anaphylatoxin;C4b-A;C4d-A;Complement C4 gamma chain	C4B;C4A
0	0	0	17735000	0	0	1	1	1	12.3	12.3	12.3	15.764	0.048507	0.54121	13546000	1	A6NC05	A6NC05	Glutaredoxin-like protein C5orf63	C5orf63
0	0	0	4753900	0	0	1	1	1	4.1	4.1	4.1	33.735	0.046053	0.78851	3631000	1	Q6P047	Q6P047	Uncharacterized protein C8orf74	C8orf74
0	0	0	265830	0	0	1	1	1	9.6	9.6	9.6	15.892	0	1.3478	745670	3	Q9NZT1	Q9NZT1	Calmodulin-like protein 5	CALML5
0	0	0	0	0	194810	1	1	1	1.2	1.2	1.2	146.54	0.050746	0.48635	1345200	1	Q5T5Y3-2;Q5T5Y3;Q5T5Y3-3	Q5T5Y3-2;Q5T5Y3;Q5T5Y3-3	Calmodulin-regulated spectrin-associated protein 1	CAMSAP1
349900	0	0	241640	0	0	2	2	2	7.9	7.9	7.9	27.679	0	2.7048	534020	3	P31944	P31944	Caspase-14;Caspase-14 subunit p17, mature form;Caspase-14 subunit p10, mature form;Caspase-14 subunit p20, intermediate form;Caspase-14 subunit p8, intermediate form	CASP14
0	0	531540	0	0	0	1	1	1	2.5	2.5	2.5	53.564	0.048295	0.47257	793440	1	Q8NEF3;Q8NEF3-2	Q8NEF3;Q8NEF3-2	Coiled-coil domain-containing protein 112	CCDC112
0	0	0	0	0	0	1	1	1	15.5	15.5	15.5	11.459	0.048649	0.45628	0	1	Q9P0B6	Q9P0B6	Coiled-coil domain-containing protein 167	CCDC167
0	0	0	0	0	8522.7	1	1	1	0.8	0.8	0.8	107.15	0.048327	0.53844	196860	0	Q4G0X9-3;Q4G0X9-2;Q4G0X9	Q4G0X9-3;Q4G0X9-2;Q4G0X9	Coiled-coil domain-containing protein 40	CCDC40
0	0	0	0	0	124630	1	1	1	1.6	1.6	1.6	56.43	0.050251	0.43948	636980	1	P49368-2;P49368	P49368-2;P49368	T-complex protein 1 subunit gamma	CCT3
295440	0	0	0	0	0	1	1	1	1.5	1.5	1.5	75.353	0.054054	0.51319	295440	1	P20273-5;P20273-4;P20273-3;P20273	P20273-5;P20273-4;P20273-3;P20273	B-cell receptor CD22	CD22
0	0	0	0	927400	0	1	1	1	1.2	1.2	1.2	112.68	0.052469	0.49509	207410	1	Q69YH5	Q69YH5	Cell division cycle-associated protein 2	CDCA2
0	0	0	0	0	122640	1	1	1	1.4	1.4	1.4	86.551	0.040936	0.72317	63813	0	P22223-2;P22223	P22223-2;P22223	Cadherin-3	CDH3
0	0	0	0	0	224520	1	1	1	6	6	6	16.408	0.049881	0.42998	342380	0	P53567	P53567	CCAAT/enhancer-binding protein gamma	CEBPG
0	0	0	0	0	53262	1	1	1	2.3	2.3	2.3	33.785	0.048257	0.455	231220	0	Q9BU64	Q9BU64	Centromere protein O	CENPO
0	0	308140	0	0	0	1	1	1	10.5	10.5	10.5	44.876	0.053292	0.49719	459970	0	Q96G23	Q96G23	Ceramide synthase 2	CERS2
6162100	0	0	654550	0	0	1	1	1	0.8	0.8	0.8	180.29	0.049383	0.57444	6666600	2	P53675-2;Q00610-2;P53675;Q00610	P53675-2;Q00610-2;P53675;Q00610	Clathrin heavy chain 2;Clathrin heavy chain 1	CLTCL1;CLTC
0	0	62034000	0	0	0	1	1	1	1.8	1.8	1.8	112.88	0.051051	0.48725	92600000	1	Q9P232	Q9P232	Contactin-3	CNTN3
0	0	0	714570	0	0	1	1	1	21.2	21.2	21.2	9.1604	0.04721	0.58335	1427300	1	P24311	P24311	Cytochrome c oxidase subunit 7B, mitochondrial	COX7B
0	0	0	358680	0	0	1	1	1	1.7	1.7	1.7	66.394	0.054422	0.51401	1625700	1	Q16526	Q16526	Cryptochrome-1	CRY1
0	0	0	0	0	39150000	1	1	1	3	3	3	51.712	0.007874	1.0032	292820000	4	O75390	O75390	Citrate synthase, mitochondrial	CS
0	0	0	1664900	0	0	1	1	1	5.2	5.2	5.2	33.248	0.054313	0.50088	3724300	2	P07333-2;P07333	P07333-2;P07333	Macrophage colony-stimulating factor 1 receptor	CSF1R
0	0	0	0	0	213160	1	1	1	12.2	12.2	12.2	11.006	0	7.3249	713160	3	P01040	P01040	Cystatin-A;Cystatin-A, N-terminally processed	CSTA
4861200	0	1831200	3632000	0	2077300	2	2	2	20	20	20	11.284	0	2.1504	11403000	7	P81605;P81605-2	P81605;P81605-2	Dermcidin;Survival-promoting peptide;DCD-1	DCD
0	0	0	0	0	828430	1	1	1	0.3	0.3	0.3	322.23	0.043062	0.61909	9812900	0	Q6V1P9	Q6V1P9	Protocadherin-23	DCHS2
0	0	0	141170	0	0	1	1	1	2.2	2.2	2.2	60.563	0.035714	0.66328	515390	1	P17844-2;P17844;Q92841-1;Q92841-3;Q92841-2;Q92841	P17844-2;P17844;Q92841-1;Q92841-3;Q92841-2;Q92841	Probable ATP-dependent RNA helicase DDX5;Probable ATP-dependent RNA helicase DDX17	DDX5;DDX17
77748000	0	0	0	0	0	1	1	1	18.4	18.4	18.4	9.886	0.051095	0.43488	77748000	1	Q30KR1	Q30KR1	Beta-defensin 109	DEFB109P1
0	0	0	423940	0	0	1	1	1	2.6	2.6	2.6	74.605	0.044872	0.77057	777330	1	Q9NR61	Q9NR61	Delta-like protein 4	DLL4
0	0	0	0	0	5516700	1	1	1	0.5	0.5	0.5	271.04	0	1.0968	10241000	4	P11532-3;P11532-2;P11532-4;P11532	P11532-3;P11532-2;P11532-4;P11532	Dystrophin	DMD
0	0	0	0	0	21560000	2	2	2	0.4	0.4	0.4	510.44	0.027778	0.87178	11783000	0	Q96JB1-2;Q96JB1;Q8TE73	Q96JB1-2;Q96JB1;Q8TE73	Dynein heavy chain 8, axonemal;Dynein heavy chain 5, axonemal	DNAH8;DNAH5
1068000	1023200	1277300	0	0	0	3	3	3	8.1	8.1	8.1	57.196	0	32.795	1068000	3	Q9NVH1-3;Q9NVH1-2;Q9NVH1	Q9NVH1-3;Q9NVH1-2;Q9NVH1	DnaJ homolog subfamily C member 11	DNAJC11
0	0	0	0	0	0	1	1	1	0.9	0.9	0.9	222.22	0.046512	0.60994	0	1	Q8N1I0-2;Q8N1I0;Q8N1I0-3	Q8N1I0-2;Q8N1I0;Q8N1I0-3	Dedicator of cytokinesis protein 4	DOCK4
0	0	0	0	0	31275000	1	1	1	4.4	4.4	4.4	37.161	0.053125	0.49656	28344000	1	Q18PE1-2;Q18PE1;Q18PE1-3	Q18PE1-2;Q18PE1;Q18PE1-3	Protein Dok-7	DOK7
552090	0	0	642650	0	0	3	3	3	4.3	4.3	4.3	113.75	0	1.9383	1030600	3	Q02413;Q02413-2	Q02413	Desmoglein-1	DSG1
655880	0	0	1950400	0	0	5	5	5	1.8	1.8	1.8	331.77	0	39.391	2079100	5	P15924;P15924-3;P15924-2	P15924;P15924-3;P15924-2	Desmoplakin	DSP
0	0	866260	0	0	0	1	1	1	1	1	1	137.6	0.049774	0.59906	1293100	1	Q9NRD9-2;Q9NRD9	Q9NRD9-2;Q9NRD9	Dual oxidase 1	DUOX1
0	0	510290	0	0	250270	2	2	2	5.2	5.2	5.2	47.869	0	1.7111	1185400	6	P68104-2;Q5VTE0;P68104;Q05639	P68104-2;Q5VTE0;P68104;Q05639	Elongation factor 1-alpha 1;Putative elongation factor 1-alpha-like 3;Elongation factor 1-alpha 2	EEF1A1;EEF1A1P5;EEF1A2
0	0	0	44824	0	0	1	1	1	2.3	2.3	2.3	50.118	0.050209	0.57657	375390	1	P26641;P26641-2	P26641;P26641-2	Elongation factor 1-gamma	EEF1G
0	0	0	0	0	0	1	1	1	2.1	2.1	2.1	75.481	0.055172	0.51614	0	1	Q9Y2G0-2;Q9Y2G0-3;Q9Y2G0	Q9Y2G0-2;Q9Y2G0-3;Q9Y2G0	Protein EFR3 homolog B	EFR3B
773480	0	0	0	0	0	1	1	1	1.3	1.3	1.3	69.15	0	1.3668	773480	1	P23588	P23588	Eukaryotic translation initiation factor 4B	EIF4B
0	0	0	0	0	1996800	1	1	1	1.5	1.5	1.5	70.678	0.057143	0.52229	1435300	2	O95834	O95834	Echinoderm microtubule-associated protein-like 2	EML2
0	0	0	0	4446000	0	1	1	1	5.6	5.6	5.6	36.928	0.037838	0.70219	73271	1	P06733-2;P06733	P06733-2;P06733	Alpha-enolase	ENO1
0	0	0	0	0	41939	1	1	1	1.9	1.9	1.9	54.665	0.051345	0.43622	21822	0	Q9UJA9	Q9UJA9	Ectonucleotide pyrophosphatase/phosphodiesterase family member 5	ENPP5
0	0	0	156120	0	0	1	1	1	10.6	10.6	10.6	12.259	0	1.7575	657000	2	P84090	P84090	Enhancer of rudimentary homolog	ERH
0	0	0	220360	0	0	1	1	1	28.6	28.6	28.6	5.8131	0.044118	0.63209	3265800	1	Q6P6B1-2;Q6P6B1	Q6P6B1-2;Q6P6B1	Glutamate-rich protein 5	ERICH5
0	0	0	254870	0	0	1	1	1	1.1	1.1	1.1	91.946	0.048837	0.42521	194660	0	Q9QC07;P63136;Q9BXR3;P63133;P63132;Q9WJR5;Q9UQG0;P10266;P63135	Q9QC07;P63136;Q9BXR3;P63133;P63132;Q9WJR5;Q9UQG0;P10266;P63135	Endogenous retrovirus group K member 18 Pol protein;Reverse transcriptase;Ribonuclease H;Endogenous retrovirus group K member 25 Pol protein;Reverse transcriptase;Ribonuclease H;Integrase;Endogenous retrovirus group K member 6 Pol protein;Reverse transcriptase;Ribonuclease H;Integrase;Endogenous retrovirus group K member 8 Pol protein;Reverse transcriptase;Ribonuclease H;Integrase;Endogenous retr…	ERVK-18;ERVK-25;ERVK-6;ERVK-8;HERVK_113;ERVK-19;ERVK-11;ERVK-10;ERVK-7
0	0	0	200580	0	0	1	1	1	12	12	12	8.8201	0.048433	0.47613	241820	0	P61582	P61582	Endogenous retrovirus group K member 7 Np9 protein	ERVK-7
0	0	0	465050	0	0	1	1	1	6.7	6.7	6.7	15.164	0	1.6305	355200	1	Q01469	Q01469	Fatty acid-binding protein, epidermal	FABP5
141740000	0	0	0	0	0	1	1	1	2.4	2.4	2.4	52.734	0.04	0.71997	141740000	2	Q8NEE6-4;Q8NEE6-3;Q8NEE6-2;Q8NEE6	Q8NEE6-4;Q8NEE6-3;Q8NEE6-2;Q8NEE6	F-box/LRR-repeat protein 13	FBXL13
0	0	0	0	0	252670	1	1	1	12.3	12.3	12.3	23.441	0.05	0.43144	434170	1	Q86XK2-4;Q86XK2;Q86XK2-5	Q86XK2-4;Q86XK2;Q86XK2-5	F-box only protein 11	FBXO11
0	0	0	2064700	0	0	1	1	1	2.9	2.9	2.9	33.102	0.05	0.55238	9051700	1	Q8IX29-2;Q8IX29	Q8IX29-2;Q8IX29	F-box only protein 16	FBXO16
0	0	0	613330	0	0	1	1	1	10.1	10.1	10.1	19.746	0.042254	0.61189	468460	1	Q9NVF7-2;Q9NVF7	Q9NVF7-2;Q9NVF7	F-box only protein 28	FBXO28
0	0	8972.3	0	0	0	1	1	1	0.4	0.4	0.4	209.31	0.05296	0.49641	13393	0	Q2WGJ9	Q2WGJ9	Fer-1-like protein 6	FER1L6
0	0	0	0	0	109860	1	1	1	2.6	2.6	2.6	55.928	0.008	1.008	57165	1	P02675	P02675	Fibrinogen beta chain;Fibrinopeptide B;Fibrinogen beta chain	FGB
0	0	0	0	0	0	1	1	1	2.1	2.1	2.1	68.793	0.050781	0.55854	0	1	Q5JSP0-2;Q5JSP0-3;Q5JSP0	Q5JSP0-2;Q5JSP0-3;Q5JSP0	FYVE, RhoGEF and PH domain-containing protein 3	FGD3
0	0	1605000	728530	0	1296000	2	2	2	1	1	1	248.07	0	11.046	3924100	7	CON__Q5D862;Q5D862	CON__Q5D862;Q5D862	Filaggrin-2	FLG2
361960	0	0	0	0	0	1	1	1	0.6	0.6	0.6	391.7	0.054237	0.51383	361960	1	Q5CZC0-2;Q5CZC0	Q5CZC0-2;Q5CZC0	Fibrous sheath-interacting protein 2	FSIP2
0	0	0	714200	0	0	1	1	1	2.8	2.8	2.8	62.367	0.038462	0.70462	803030	1	Q2WGN9	Q2WGN9	GRB2-associated-binding protein 4	GAB4
0	0	0	746490	0	0	1	1	1	1	1	1	105.82	0.046448	0.46101	742410	0	O75899	O75899	Gamma-aminobutyric acid type B receptor subunit 2	GABBR2
0	0	0	0	0	0	1	1	1	15.2	15.2	15.2	12.046	0.046218	0.57891	0	1	Q10472-2;Q10472	Q10472-2;Q10472	Polypeptide N-acetylgalactosaminyltransferase 1;Polypeptide N-acetylgalactosaminyltransferase 1 soluble form	GALNT1
0	0	0	0	0	21793000	1	1	1	3.5	3.5	3.5	35.693	0	2.0831	11340000	1	P54826	P54826	Growth arrest-specific protein 1	GAS1
0	0	0	0	0	0	1	1	1	1.8	1.8	1.8	169.9	0.028169	0.8892	0	1	Q5IS56;P10071	Q5IS56;P10071	Transcriptional activator GLI3;Transcriptional repressor GLI3R	GLI3
210240	0	0	0	0	0	1	1	1	1.5	1.5	1.5	65.459	0.050971	0.43481	210240	0	O94925-3;O94925	O94925-3;O94925	Glutaminase kidney isoform, mitochondrial	GLS
0	0	0	222790	0	0	1	1	1	1.9	1.9	1.9	83.068	0	1.637	553770	1	Q8N7Z2;A8MZA4;H0YM25	Q8N7Z2;A8MZA4;H0YM25	Golgin subfamily A member 6-like protein 1;Putative golgin subfamily A member 6-like protein 6;Golgin subfamily A member 6-like protein 22	GOLGA6L1;GOLGA6L6;GOLGA6L22
0	0	0	0	0	7522500	1	1	1	4.6	4.6	4.6	44.272	0	4.7088	15051000	7	Q8NBJ4-2;Q8NBJ4	Q8NBJ4-2;Q8NBJ4	Golgi membrane protein 1	GOLM1
0	0	34552	0	0	0	1	1	1	2	2	2	62.735	0.040462	0.72067	51577	0	Q9Y625	Q9Y625	Glypican-6;Secreted glypican-6	GPC6
0	0	0	0	0	0	1	1	1	1.7	1.7	1.7	88.678	0.035897	0.66438	0	1	Q8NFN8-2;Q8NFN8	Q8NFN8-2;Q8NFN8	Probable G-protein coupled receptor 156	GPR156
628920	0	0	0	0	0	1	1	1	1	1	1	88.494	0.048673	0.58947	628920	1	Q8TF76	Q8TF76	Serine/threonine-protein kinase haspin	GSG2
0	0	0	0	0	1147200	1	1	1	6.6	6.6	6.6	22.484	0.0081301	1.0254	10137000	2	O95843-2;O95843	O95843-2;O95843	Guanylyl cyclase-activating protein 3	GUCA1C
0	0	0	0	0	1211800	1	1	1	1.1	1.1	1.1	81.749	0.04878	0.45632	931660	1	P33402;P33402-3;P33402-2	P33402;P33402-3;P33402-2	Guanylate cyclase soluble subunit alpha-2	GUCY1A2
0	0	0	236180	0	0	1	1	1	7.3	7.3	7.3	19.167	0	2.3206	398690	1	P07305-2;P07305	P07305-2;P07305	Histone H1.0;Histone H1.0, N-terminally processed	H1F0
0	0	0	0	468800	0	1	1	1	13.6	13.6	13.6	6.8918	0	1.4043	3567200	3	Q71UI9-5;Q71UI9-2;P16104;Q96QV6;Q93077;Q8IUE6;Q7L7L0;P04908;P20671;P0C0S8;Q6FI13;Q9BTM1;Q16777;Q71UI9;Q96KK5;P0C0S5;Q99878;Q9BTM1-2	Q71UI9-5;Q71UI9-2;P16104;Q96QV6;Q93077;Q8IUE6;Q7L7L0;P04908;P20671;P0C0S8;Q6FI13;Q9BTM1;Q16777;Q71UI9;Q96KK5;P0C0S5;Q99878;Q9BTM1-2	Histone H2A.V;Histone H2AX;Histone H2A type 1-A;Histone H2A type 1-C;Histone H2A type 2-B;Histone H2A type 3;Histone H2A type 1-B/E;Histone H2A type 1-D;Histone H2A type 1;Histone H2A type 2-A;Histone H2A.J;Histone H2A type 2-C;Histone H2A type 1-H;Histone H2A.Z;Histone H2A type 1-J	H2AFV;H2AFX;HIST1H2AA;HIST1H2AC;HIST2H2AB;HIST3H2A;HIST1H2AB;HIST1H2AD;HIST1H2AG;HIST2H2AA3;H2AFJ;HIST2H2AC;HIST1H2AH;H2AFZ;HIST1H2AJ
11224000	0	0	0	0	0	1	1	1	3.5	3.5	3.5	66.705	0.046196	0.45978	11224000	1	P54257-3;P54257-4;P54257-2;P54257	P54257-3;P54257-4;P54257-2;P54257	Huntingtin-associated protein 1	HAP1
0	0	4996800	0	0	7002600	2	2	2	2.5	2.5	2.5	56.384	0	1.4446	13240000	3	Q68CZ6-2;Q68CZ6	Q68CZ6-2;Q68CZ6	HAUS augmin-like complex subunit 3	HAUS3
0	0	0	12354000	0	0	1	1	1	4.6	4.6	4.6	51.998	0.029851	0.96826	9435500	1	Q92769-3;Q92769	Q92769-3;Q92769	Histone deacetylase 2	HDAC2
7416600	0	0	8370600	0	0	2	2	2	10.2	10.2	10.2	22.58	0	1.8905	13808000	2	P16401	P16401	Histone H1.5	HIST1H1B
0	0	0	2971900	0	0	2	2	2	10.8	10.8	10.8	21.364	0	2.1641	3841400	3	P16403;P10412;P16402;P22492;Q02539	P16403;P10412;P16402;P22492;Q02539	Histone H1.2;Histone H1.4;Histone H1.3;Histone H1t;Histone H1.1	HIST1H1C;HIST1H1E;HIST1H1D;HIST1H1T;HIST1H1A
588200	0	0	0	0	0	2	2	2	15.1	15.1	15.1	13.952	0	1.3944	691190	1	Q99880;Q99879;Q99877;Q93079;Q5QNW6;P62807;P58876;P57053;O60814;Q5QNW6-2;Q8N257;Q16778;P33778;P23527;P06899;Q96A08	Q99880;Q99879;Q99877;Q93079;Q5QNW6;P62807;P58876;P57053;O60814;Q5QNW6-2;Q8N257;Q16778;P33778;P23527;P06899;Q96A08	Histone H2B type 1-L;Histone H2B type 1-M;Histone H2B type 1-N;Histone H2B type 1-H;Histone H2B type 2-F;Histone H2B type 1-C/E/F/G/I;Histone H2B type 1-D;Histone H2B type F-S;Histone H2B type 1-K;Histone H2B type 3-B;Histone H2B type 2-E;Histone H2B type 1-B;Histone H2B type 1-O;Histone H2B type 1-J;Histone H2B type 1-A	HIST1H2BL;HIST1H2BM;HIST1H2BN;HIST1H2BH;HIST2H2BF;HIST1H2BC;HIST1H2BD;H2BFS;HIST1H2BK;HIST3H2BB;HIST2H2BE;HIST1H2BB;HIST1H2BO;HIST1H2BJ;HIST1H2BA
0	0	0	557650	0	0	2	2	1	28.7	28.7	23.5	15.404	0	4.6602	3355100	31	P68431;Q6NXT2;Q16695;P84243	P68431;Q6NXT2;Q16695;P84243	Histone H3.1;Histone H3.3C;Histone H3.1t;Histone H3.3	HIST1H3A;H3F3C;HIST3H3;H3F3A
6701000	0	791120	2016300	0	1192600	4	4	4	40.8	40.8	40.8	11.367	0	7.8508	10260000	10	P62805	P62805	Histone H4	HIST1H4A
0	21509000	0	0	0	0	2	1	1	28.7	23.5	23.5	15.388	0.054662	0.50214	274960	1	Q71DI3	Q71DI3	Histone H3.2	HIST2H3A
0	0	91750	0	0	0	1	1	1	3.4	3.4	3.4	48.562	0.046358	0.80794	136960	1	P61978-3;P61978;P61978-2	P61978-3;P61978;P61978-2	Heterogeneous nuclear ribonucleoprotein K	HNRNPK
0	0	1027700	0	0	3461000	2	2	2	13.3	13.3	13.3	38.451	0	1.4857	3272300	4	P00738-2;P00738;P00739;P00739-2	P00738-2;P00738;P00739;P00739-2	Haptoglobin;Haptoglobin alpha chain;Haptoglobin beta chain;Haptoglobin-related protein	HP;HPR
0	0	0	0	0	241330	1	1	1	3.2	3.2	3.2	51.676	0	3.0247	169420	1	P02790	P02790	Hemopexin	HPX
0	0	0	0	0	99874	1	1	1	0.8	0.8	0.8	282.39	0.041916	0.7286	298790	1	CON__Q86YZ3;Q86YZ3	CON__Q86YZ3;Q86YZ3	Hornerin	HRNR
1141900	0	99221	0	0	0	1	1	1	3	3	3	40.244	0.046667	0.8188	400690	1	P48741;P17066	P48741;P17066	Putative heat shock 70 kDa protein 7;Heat shock 70 kDa protein 6	HSPA1A
659520	890950	478440	0	0	0	2	2	2	3.7	3.7	3.7	70.897	0	1.45	725250	2	P11142;P11142-2;P54652;P34931;P11021	P11142;P11142-2;P54652;P34931;P11021	Heat shock cognate 71 kDa protein;Heat shock-related 70 kDa protein 2;Heat shock 70 kDa protein 1-like;78 kDa glucose-regulated protein	HSPA8;HSPA2;HSPA1L;HSPA5
0	0	37576	0	0	0	1	1	1	5.8	5.8	5.8	15.865	0.048499	0.42455	56090	0	O43820-4;O43820-3;O43820-2;O43820	O43820-4;O43820-3;O43820-2;O43820	Hyaluronidase-3	HYAL3
0	0	0	5036500	0	0	1	1	1	31.5	31.5	31.5	9.8063	0.04698	0.82321	3846800	1	P10997	P10997	Islet amyloid polypeptide	IAPP
0	0	0	157490	0	0	1	1	1	1.9	1.9	1.9	54.557	0.027397	0.86527	238010	0	Q05084-3;Q05084;Q05084-2	Q05084-3;Q05084;Q05084-2	Islet cell autoantigen 1	ICA1
1823000	0	0	0	0	0	1	1	1	2.4	2.4	2.4	47.075	0.047887	0.47176	1823000	1	Q6ZQW0	Q6ZQW0	Indoleamine 2,3-dioxygenase 2	IDO2
0	0	0	0	0	4284500	1	1	1	1.6	1.6	1.6	116.69	0.049327	0.59281	4481900	3	Q9BYX4	Q9BYX4	Interferon-induced helicase C domain-containing protein 1	IFIH1
7783700	0	0	0	0	0	1	1	1	2.8	2.8	2.8	35.9	0	2.5093	7783700	1	P01859	P01859	Ig gamma-2 chain C region	IGHG2
0	0	0	2765800	0	0	1	1	1	9.4	9.4	9.4	12.82	0	3.2612	8138800	3	A0A0C4DH31;P23083	A0A0C4DH31;P23083	Ig heavy chain V-I region V35	IGHV1-18
0	0	0	66797	0	0	1	1	1	9.4	9.4	9.4	13.508	0	2.0443	294700	1	A0A0A0MS14	A0A0A0MS14		IGHV1-45
1215200000	41088000	995230000	428790000	271330000	349980000	3	3	3	16.7	16.7	16.7	13.085	0	76.665	3164200000	72	A2NJV5;A0A0A0MRZ7;A0A075B6S2;A0A075B6S6;A0A075B6P5;A0A0C4DH68;A0A087WW87;P06310;P01615;P01614	A2NJV5;A0A0A0MRZ7;A0A075B6S2		IGKV A18;IGKV2D-26;IGKV2D-29
0	0	0	0	0	2437700	1	1	1	1	1	1	135.19	0.049618	0.54803	3392300	2	O75054;O75054-2	O75054;O75054-2	Immunoglobulin superfamily member 3	IGSF3
0	0	21249	0	0	0	1	1	1	1	1	1	105.7	0.051471	0.43676	31719	0	Q96PE3-2;Q96PE3-4;Q96PE3-3;Q96PE3	Q96PE3-2;Q96PE3-4;Q96PE3-3;Q96PE3	Type I inositol 3,4-bisphosphate 4-phosphatase	INPP4A
0	0	0	0	0	0	1	1	1	2.5	2.5	2.5	57.799	0.047222	0.46791	0	2	Q9Y2H2-4;Q9Y2H2	Q9Y2H2-4;Q9Y2H2	Phosphatidylinositide phosphatase SAC2	INPP5F
0	0	0	0	0	520570	1	1	1	2.3	2.3	2.3	101.39	0	2.678	893840	2	P19827	P19827	Inter-alpha-trypsin inhibitor heavy chain H1	ITIH1
0	0	0	87134	0	0	1	1	1	1.6	1.6	1.6	62.577	0.051793	0.56497	66552	0	Q6GPH6-3;Q6GPH6;Q6GPH6-2	Q6GPH6-3;Q6GPH6;Q6GPH6-2	Inositol 1,4,5-trisphosphate receptor-interacting protein-like 1	ITPRIPL1
0	0	0	67166000	0	0	1	1	1	1.1	1.1	1.1	187.79	0.049708	0.48201	51300000	1	Q15811-4;Q15811-9;Q15811-8;Q15811	Q15811-4;Q15811-9;Q15811-8;Q15811	Intersectin-1	ITSN1
708230	0	0	1130100	0	0	4	4	4	7.1	7.1	7.1	81.744	0	6.3316	1861000	5	P14923	P14923	Junction plakoglobin	JUP
0	0	177150	0	0	362720	3	3	3	17.5	17.5	17.5	26.092	0	1.5417	2081300	3	Q9NXV2	Q9NXV2	BTB/POZ domain-containing protein KCTD5	KCTD5
0	0	0	0	0	80277	1	1	1	1.8	1.8	1.8	56.804	0.050898	0.48693	41771	0	B2RXH2	B2RXH2	Lysine-specific demethylase 4E	KDM4E
193410	0	0	0	0	0	1	1	1	0.7	0.7	0.7	161.89	0.041667	0.72528	193410	0	Q9BVV6-2;Q9BVV6-4;Q9BVV6;Q9BVV6-3	Q9BVV6-2;Q9BVV6-4;Q9BVV6;Q9BVV6-3	Protein TALPID3	KIAA0586
0	0	0	0	0	41849	1	1	1	9.2	9.2	9.2	10.836	0.057348	0.52326	21775	0	Q96A73-3;Q96A73-2;Q96A73	Q96A73-3;Q96A73-2;Q96A73	Putative monooxygenase p33MONOX	KIAA1191
329710	0	0	0	0	0	1	1	1	0.8	0.8	0.8	241.68	0.051829	0.49239	329710	1	Q68DE3	Q68DE3	Basic helix-loop-helix domain-containing protein KIAA2018	KIAA2018
0	0	50267000	0	0	14150000	30	30	30	32.5	32.5	32.5	119.16	0	323.31	84693000	59	P52732	P52732	Kinesin-like protein KIF11	KIF11
0	0	31277	0	0	0	1	1	1	0.6	0.6	0.6	180.74	0.047244	0.44901	46688	0	Q7Z4S6-6;Q7Z4S6-3;Q7Z4S6-5;Q7Z4S6-2;Q7Z4S6;Q7Z4S6-4	Q7Z4S6-6;Q7Z4S6-3;Q7Z4S6-5;Q7Z4S6-2;Q7Z4S6;Q7Z4S6-4	Kinesin-like protein KIF21A	KIF21A
0	0	0	808280	0	0	1	1	1	0.7	0.7	0.7	179.75	0.043902	0.62603	617350	1	O75037-3;O75037-4;O75037-2;O75037	O75037-3;O75037-4;O75037-2;O75037	Kinesin-like protein KIF21B	KIF21B
850300	0	0	1822600	0	0	3	3	3	7.9	7.9	7.9	64.135	0	2.2787	2261200	3	Q5T749	Q5T749	Keratinocyte proline-rich protein	KPRP
367410000	14810000	468120000	433640000	176800000	474550000	47	47	35	64	64	50.9	66.038	0	323.31	1710700000	366	P04264;CON__P04264;CON__Q6IFZ6;CON__Q9R0H5	P04264;CON__P04264	Keratin, type II cytoskeletal 1	KRT1
221370000	20133000	358510000	258170000	133360000	429460000	36	36	28	60.7	60.7	54.6	59.51	0	323.31	1221200000	279	CON__P13645;P13645;CON__P02535-1;CON__Q7Z3Y7;Q7Z3Y7;CON__Q148H6;CON__Q7Z3Z0;CON__Q2M2I5;Q7Z3Z0;Q2M2I5	CON__P13645;P13645	Keratin, type I cytoskeletal 10	KRT10
0	0	0	0	0	0	10	1	0	18.1	2.4	0	45.771	0.039326	0.71074	0	1	CON__ENSEMBL:ENSP00000377550;P13646-3;P13646;P13646-2	CON__ENSEMBL:ENSP00000377550;P13646-3;P13646;P13646-2	Keratin, type I cytoskeletal 13	KRT13
13975000	0	10363000	27554000	6535700	7512900	32	15	8	60.2	34.1	22.7	51.621	0	323.31	55220000	52	CON__P02533;P02533;CON__Q6IFX2;CON__A2A4G1;CON__Q61782;CON__Q8N1A0;CON__Q7Z3Y9;Q8N1A0-2;Q8N1A0;Q7Z3Y9	CON__P02533;P02533;CON__Q6IFX2	Keratin, type I cytoskeletal 14	KRT14
368850	0	0	0	0	0	10	2	0	14.5	3.7	0	49.167	0	2.3466	1900100	2	CON__P19012;P19012;P19012-2;CON__Q99456;Q99456	CON__P19012;P19012;P19012-2	Keratin, type I cytoskeletal 15	KRT15
50244000	0	14560000	195770000	0	15674000	33	28	15	67.4	62.2	41.4	51.267	0	323.31	228500000	71	CON__P08779;P08779;CON__Q9Z2K1;CON__Q3ZAW8	CON__P08779;P08779	Keratin, type I cytoskeletal 16	KRT16
2878800	0	0	15833000	0	0	24	10	3	44.9	25	7.2	48.105	0	170.19	14883000	11	CON__Q04695;Q04695	CON__Q04695;Q04695	Keratin, type I cytoskeletal 17	KRT17
0	62652000	0	0	0	0	4	2	2	12.1	8.4	8.4	48.057	0	4.6215	1904100	25	P05783;CON__H-INV:HIT000015463	P05783	Keratin, type I cytoskeletal 18	KRT18
0	0	0	1567200	0	0	11	1	0	18.5	2.2	0	44.091	0	1.1706	1197000	2	CON__P08727;P08727	CON__P08727;P08727	Keratin, type I cytoskeletal 19	KRT19
60936000	26294000	118030000	94212000	86674000	99314000	36	34	25	66.2	63.1	51.3	65.432	0	323.31	373350000	180	CON__P35908v2;P35908;CON__P35908;Q01546;CON__Q5XKE5;CON__Q01546;Q5XKE5	CON__P35908v2;P35908;CON__P35908	Keratin, type II cytoskeletal 2 epidermal	KRT2
0	0	0	0	0	31555	3	1	1	5.9	2	2	49.823	0.050296	0.48485	16419	0	CON__Q7Z3Y8;Q7Z3Y8	CON__Q7Z3Y8;Q7Z3Y8	Keratin, type I cytoskeletal 27	KRT27
149370000	0	0	183870	0	0	12	11	1	26.2	24.5	2.6	47.237	0	243.11	150840000	20	CON__Q9UE12;CON__Q15323;Q15323;CON__Q9C075;CON__A2AB72;Q9C075	CON__Q9UE12;CON__Q15323;Q15323	Keratin, type I cuticular Ha1	KRT31
3342400	0	0	0	0	0	8	2	2	13.2	2.5	2.5	50.343	0	1.4009	3342400	2	Q14532;CON__Q14532	Q14532;CON__Q14532	Keratin, type I cuticular Ha2	KRT32
17944000	0	0	0	0	0	10	2	2	18.6	3	3	46.213	0	35.657	17944000	3	CON__Q14525;Q14525	CON__Q14525;Q14525	Keratin, type I cuticular Ha3-II	KRT33B
8219300	0	0	0	0	0	8	2	2	15	4.5	4.5	52.247	0	5.7397	9040500	4	CON__O76013;O76013-2;O76013;CON__O76015;O76015	CON__O76013;O76013-2;O76013	Keratin, type I cuticular Ha6	KRT36
289320	0	0	0	0	0	4	3	2	7.4	5.9	3.9	63.91	0	78.964	521880	3	CON__P19013;P19013	CON__P19013;P19013	Keratin, type II cytoskeletal 4	KRT4
11061000	0	15858000	19864000	0	15042000	26	16	6	42	27.6	11	62.378	0	141.58	56192000	43	CON__P13647;P13647	CON__P13647;P13647	Keratin, type II cytoskeletal 5	KRT5
29297000	0	11456000	82719000	0	20131000	29	23	2	49.6	41	3.5	60.044	0	323.31	118040000	53	P02538;CON__P02538;CON__Q8VED5	P02538;CON__P02538	Keratin, type II cytoskeletal 6A	KRT6A
0	0	1394300	0	0	0	5	4	3	9.4	7.6	5.3	55.877	0	30.285	11887000	4	CON__Q14CN4-1;Q14CN4-3;Q14CN4-2;Q14CN4;CON__Q6IME9;CON__Q3KNV1;CON__P08729;P08729	CON__Q14CN4-1;Q14CN4-3;Q14CN4-2;Q14CN4;CON__Q6IME9	Keratin, type II cytoskeletal 72	KRT72
0	0	0	16105000	0	0	4	1	1	10.9	5	5	58.923	0.027586	0.86712	12337000	1	CON__Q32MB2;Q86Y46;Q86Y46-2;CON__Q7RTS7;Q7RTS7;CON__Q3SY84;Q3SY84	CON__Q32MB2;Q86Y46;Q86Y46-2;CON__Q7RTS7;Q7RTS7	Keratin, type II cytoskeletal 73;Keratin, type II cytoskeletal 74	KRT73;KRT74
43525000	0	0	0	0	0	8	1	1	13.2	2	2	59.504	0	3.1065	43525000	1	CON__O95678;O95678	CON__O95678;O95678	Keratin, type II cytoskeletal 75	KRT75
0	0	0	0	0	29875000	2	1	1	3.8	1.7	1.7	61.802	0	56.003	80339000	6	CON__Q7Z794;Q7Z794	CON__Q7Z794;Q7Z794	Keratin, type II cytoskeletal 1b	KRT77
0	0	447020	478000	0	471480	3	2	2	5.6	4	4	56.964	0	18.935	1494800	4	CON__Q8N1N4-2;CON__Q7RTT2;Q8N1N4-2;Q8N1N4	CON__Q8N1N4-2;CON__Q7RTT2;Q8N1N4-2;Q8N1N4	Keratin, type II cytoskeletal 78	KRT78
0	0	0	0	10420000	0	5	3	3	11.6	7.7	7.7	53.704	0	99.705	1239100	201	CON__P05787;P05787;P05787-2;CON__H-INV:HIT000292931	CON__P05787;P05787;P05787-2;CON__H-INV:HIT000292931	Keratin, type II cytoskeletal 8	KRT8
18817000	0	0	0	0	0	5	3	3	7.6	3.7	3.7	56.682	0	61.975	35982000	5	CON__Q9NSB4;Q9NSB4	CON__Q9NSB4;Q9NSB4	Keratin, type II cuticular Hb2	KRT82
275810000	0	0	226020	0	0	19	19	2	28.6	28.6	3.9	54.195	0	173.12	276470000	30	CON__Q6NT21;P78385;CON__P78385;CON__Q14533;CON__O43790;O43790;Q14533;CON__Q9NSB2;CON__Q6ISB0;Q9NSB2	CON__Q6NT21;P78385;CON__P78385;CON__Q14533;CON__O43790;O43790;Q14533	Keratin, type II cuticular Hb3;Keratin, type II cuticular Hb6;Keratin, type II cuticular Hb1	KRT83;KRT86;KRT81
5643500	0	0	0	0	0	15	2	2	22.5	5.1	5.1	55.802	0	10.588	5643500	3	CON__P78386;P78386	CON__P78386;P78386	Keratin, type II cuticular Hb5	KRT85
5291300	0	0	0	0	0	15	2	2	39.2	7.5	7.5	29.117	0	27.685	11570000	10	A6NCN2	A6NCN2	Putative keratin-87 protein	KRT87P
164040000	0	115220000	170780000	0	81202000	35	34	34	62.4	62.4	62.4	62.064	0	323.31	569780000	197	P35527;CON__P35527	P35527;CON__P35527	Keratin, type I cytoskeletal 9	KRT9
0	0	0	0	0	0	1	1	1	0.4	0.4	0.4	337.08	0.035354	0.65551	0	1	P25391	P25391	Laminin subunit alpha-1	LAMA1
1622000	0	0	0	0	0	1	1	1	5.5	5.5	5.5	27.852	0.027972	0.87464	1622000	1	A6NI73-4;A6NI73-3;A6NI73-2;A6NI73	A6NI73-4;A6NI73-3;A6NI73-2;A6NI73	Leukocyte immunoglobulin-like receptor subfamily A member 5	LILRA5
0	5809300	0	0	0	0	1	1	1	1	1	1	84.567	0.053968	0.4997	74263	0	Q5T3J3	Q5T3J3	Ligand-dependent nuclear receptor-interacting factor 1	LRIF1
0	0	0	1059400	0	0	1	1	1	17.7	17.7	17.7	9.1942	0.036649	0.67816	1484400	1	O95232-2;O95232	O95232-2;O95232	Luc7-like protein 3	LUC7L3
0	0	41600	0	0	0	1	1	1	0.2	0.2	0.2	606.16	0.048128	0.45494	62097	0	Q9UPN3-4;Q9UPN3-3;Q9UPN3-2;Q9UPN3-5;Q9UPN3	Q9UPN3-4;Q9UPN3-3;Q9UPN3-2;Q9UPN3-5;Q9UPN3	Microtubule-actin cross-linking factor 1, isoforms 1/2/3/5	MACF1
0	0	0	72505000	0	0	1	1	1	4.5	4.5	4.5	26.802	0.055556	0.51677	55379000	1	Q7L5Y9-5;Q7L5Y9-4;Q7L5Y9-3;Q7L5Y9-2;Q7L5Y9	Q7L5Y9-5;Q7L5Y9-4;Q7L5Y9-3;Q7L5Y9-2;Q7L5Y9	Macrophage erythroblast attacher	MAEA
0	0	203690000	0	0	12689000	1	1	1	6.2	6.2	6.2	35.221	0.045455	0.77716	558920000	12	Q9HAY2	Q9HAY2	Melanoma-associated antigen F1	MAGEF1
0	0	0	1065700	0	0	1	1	1	2.2	2.2	2.2	44.632	0.042453	0.61226	1036800	1	Q6ZN01	Q6ZN01	MEF2-activating motif and SAP domain-containing transcriptional regulator	MAMSTR
0	0	0	449610	0	0	1	1	1	1.6	1.6	1.6	107.7	0.051672	0.49134	656180	1	Q9Y2E5-2;Q9Y2E5	Q9Y2E5-2;Q9Y2E5	Epididymis-specific alpha-mannosidase	MAN2B2
4800800	0	0	1399700	0	0	9	9	9	4.2	4.2	4.2	270.63	0	23.029	5941300	10	P46821;P78559;P78559-2	P46821	Microtubule-associated protein 1B;MAP1B heavy chain;MAP1 light chain LC1	MAP1B
0	0	0	0	0	0	1	1	1	1.4	1.4	1.4	53.739	0.047368	0.44954	0	1	O43318-4;O43318-3;O43318-2;O43318	O43318-4;O43318-3;O43318-2;O43318	Mitogen-activated protein kinase kinase kinase 7	MAP3K7
0	0	0	257550	0	0	1	1	1	7.5	7.5	7.5	17.343	0	1.1142	281270	1	P02686-6;P02686-5;P02686-4;P02686-3;P02686-2;P02686	P02686-6;P02686-5;P02686-4;P02686-3;P02686-2;P02686	Myelin basic protein	MBP
914610	0	0	0	0	0	1	1	1	3.3	3.3	3.3	88.755	0.05098	0.55902	914610	1	Q9UJA3-2;Q9UJA3-3;Q9UJA3;Q9UJA3-4	Q9UJA3-2;Q9UJA3-3;Q9UJA3;Q9UJA3-4	DNA helicase MCM8	MCM8
0	0	0	0	0	33529	1	1	1	6.5	6.5	6.5	15.628	0.036269	0.67385	17446	0	P50221-3;P49640-2;P50221;P50222;P14652;O43364;P49640;Q03828;Q14774	P50221-3;P49640-2;P50221;P50222;P14652;O43364;P49640;Q03828;Q14774	Homeobox protein MOX-1;Homeobox even-skipped homolog protein 1;Homeobox protein MOX-2;Homeobox protein Hox-B2;Homeobox protein Hox-A2;Homeobox even-skipped homolog protein 2;H2.0-like homeobox protein	MEOX1;EVX1;MEOX2;HOXB2;HOXA2;EVX2;HLX
15362000	0	0	0	0	0	1	1	1	3.1	3.1	3.1	52.715	0	1.142	15362000	2	Q5TCX8-3;Q5TCX8	Q5TCX8-3;Q5TCX8	Mitogen-activated protein kinase kinase kinase MLK4	MLK4
1023200	0	0	0	0	0	1	1	1	1.1	1.1	1.1	166.67	0.052795	0.496	1023200	1	Q9UBG0	Q9UBG0	C-type mannose receptor 2	MRC2
0	0	818800	0	0	0	1	1	1	4	4	4	48.117	0.055375	0.50556	1222200	1	Q9BZE1	Q9BZE1	39S ribosomal protein L37, mitochondrial	MRPL37
0	0	0	1634800	0	0	1	1	1	20.5	20.5	20.5	5.1159	0.040201	0.65092	10388000	0	Q6P444-2;Q6P444	Q6P444-2;Q6P444	Mitochondrial fission regulator 2	MTFR2
0	0	0	0	0	51301	1	1	1	1	1	1	86.424	0.050125	0.43943	195620	0	O15146-3;O15146-2;O15146	O15146-3;O15146-2;O15146	Muscle, skeletal receptor tyrosine-protein kinase	MUSK
0	0	0	0	0	479020	1	1	1	1.2	1.2	1.2	128.29	0.045161	0.77357	21130000	4	Q9H6N6	Q9H6N6	Putative uncharacterized protein MYH16	MYH16
0	0	0	2406300	0	0	1	1	1	9.7	9.7	9.7	21.932	0.049645	0.42874	2991200	1	P08590	P08590	Myosin light chain 3	MYL3
0	0	0	0	0	138860	1	1	1	1.8	1.8	1.8	116.2	0.05694	0.51973	722060	1	O94832	O94832	Unconventional myosin-Id	MYO1D
0	0	0	16873000	0	0	1	1	1	0.4	0.4	0.4	212.27	0.054795	0.51556	16700000	1	Q9Y4I1-2;Q9Y4I1;Q9Y4I1-3	Q9Y4I1-2;Q9Y4I1;Q9Y4I1-3	Unconventional myosin-Va	MYO5A
0	0	0	0	0	0	1	1	1	5.6	5.6	5.6	23.223	0	2.3909	0	1	Q9H009	Q9H009	Nascent polypeptide-associated complex subunit alpha-2	NACA2
0	0	0	350740	0	0	1	1	1	1	1	1	122.48	0.051988	0.49269	2534300	1	P55160-2;P55160	P55160-2;P55160	Nck-associated protein 1-like	NCKAP1L
0	0	0	0	0	3422200	1	1	1	0.4	0.4	0.4	772.92	0.051282	0.53288	26715000	1	P20929-4;P20929;P20929-3;P20929-2	P20929-4;P20929;P20929-3;P20929-2	Nebulin	NEB
347810	0	0	0	0	0	1	1	1	9.8	9.8	9.8	10.646	0	1.6101	347810	0	Q9NPP4-4;Q9NPP4-3;Q9NPP4-2;Q9NPP4	Q9NPP4-4;Q9NPP4-3;Q9NPP4-2;Q9NPP4	NLR family CARD domain-containing protein 4	NLRC4
0	0	0	0	0	0	1	1	1	1.4	1.4	1.4	67.269	0.046729	0.61032	0	1	Q8N427	Q8N427	Thioredoxin domain-containing protein 3	NME8
0	0	0	0	0	0	1	1	1	1.9	1.9	1.9	78.457	0.022727	0.97326	0	5	Q8NC60	Q8NC60	Nitric oxide-associated protein 1	NOA1
0	0	0	0	214250	0	1	1	1	1.1	1.1	1.1	92.547	0.051515	0.49093	100080	0	Q8WTT2	Q8WTT2	Nucleolar complex protein 3 homolog	NOC3L
0	0	0	1166100	0	0	1	1	1	1.4	1.4	1.4	74.508	0.049528	0.42841	1925500	1	Q9BSC4-2;Q9BSC4-4;Q9BSC4	Q9BSC4-2;Q9BSC4-4;Q9BSC4	Nucleolar protein 10	NOL10
0	0	0	0	0	43343	1	1	1	0.9	0.9	0.9	122.06	0.049107	0.59176	1488400	3	Q5JPE7-3;Q5JPE7-2;Q15155;P69849;Q5JPE7	Q5JPE7-3;Q5JPE7-2;Q15155;P69849;Q5JPE7	Nodal modulator 2;Nodal modulator 1;Nodal modulator 3	NOMO2;NOMO1;NOMO3
0	0	0	0	0	42099	1	1	1	5.8	5.8	5.8	39.617	0.048593	0.44441	21905	0	Q99466-3;Q99466	Q99466-3;Q99466	Neurogenic locus notch homolog protein 4;Notch 4 extracellular truncation;Notch 4 intracellular domain	NOTCH4
0	0	0	0	0	4808900	2	2	2	1.7	1.7	1.7	193	0	1.1285	7126800	2	Q86VF7-4;Q86VF7-3;Q86VF7;Q86VF7-2	Q86VF7-4;Q86VF7-3;Q86VF7;Q86VF7-2	Nebulin-related-anchoring protein	NRAP
0	0	0	95983	0	0	1	1	1	1.6	1.6	1.6	66.389	0.050595	0.48611	73311	0	Q9H0G5	Q9H0G5	Nuclear speckle splicing regulatory protein 1	NSRP1
0	0	0	0	0	4034100	1	1	1	1.2	1.2	1.2	109.28	0.028986	0.92586	36853000	4	Q14980-5;Q14980-4;Q14980-3;Q14980-2;Q14980	Q14980-5;Q14980-4;Q14980-3;Q14980-2;Q14980	Nuclear mitotic apparatus protein 1	NUMA1
24301000	0	0	0	0	0	1	1	1	1.8	1.8	1.8	72.732	0.038674	0.70579	24301000	1	O15381-3;O15381-4;O15381-2;O15381-5;O15381	O15381-3;O15381-4;O15381-2;O15381-5;O15381	Nuclear valosin-containing protein-like	NVL
368350	0	0	0	0	0	1	1	1	2.4	2.4	2.4	62.262	0.04142	0.72508	368350	1	Q6UWF7;Q8N323	Q6UWF7;Q8N323	NXPE family member 4;NXPE family member 1	NXPE4;NXPE1
0	0	0	1025000	0	0	1	1	1	3	3	3	48.18	0.048246	0.58853	2022200	1	Q02218-3;Q02218-2;Q02218	Q02218-3;Q02218-2;Q02218	2-oxoglutarate dehydrogenase, mitochondrial	OGDH
0	0	49475	0	0	0	1	1	1	13.1	13.1	13.1	35.542	0.050193	0.55307	73852	0	O76000	O76000	Putative olfactory receptor 2B3	OR2B3
1780300	0	0	0	0	0	1	1	1	7.4	7.4	7.4	34.557	0	1.1712	1780300	1	Q8NH72	Q8NH72	Olfactory receptor 4C6	OR4C6
0	0	0	0	0	421870	1	1	1	4.5	4.5	4.5	23.602	0.049628	0.43852	372180	1	P19652;P02763	P19652;P02763	Alpha-1-acid glycoprotein 2;Alpha-1-acid glycoprotein 1	ORM2;ORM1
0	0	0	263160	0	0	1	1	1	1.6	1.6	1.6	113.08	0.049133	0.4798	1634900	1	P09874	P09874	Poly [ADP-ribose] polymerase 1	PARP1
0	4279200	0	0	0	0	1	1	1	3	3	3	34.842	0.046414	0.57895	106580	1	P28328	P28328	Peroxisome biogenesis factor 2	PEX2
3391700	0	0	0	0	0	1	1	1	4.3	4.3	4.3	31.641	0.053872	0.51259	3391700	1	Q6NSJ2-2;Q6NSJ2	Q6NSJ2-2;Q6NSJ2	Pleckstrin homology-like domain family B member 3	PHLDB3
2086200	0	0	0	0	0	1	1	1	1.2	1.2	1.2	83.597	0.048101	0.44238	2086200	1	P27986;P27986-4	P27986;P27986-4	Phosphatidylinositol 3-kinase regulatory subunit alpha	PIK3R1
0	0	0	0	0	601120	1	1	1	8.2	8.2	8.2	16.572	0	1.1237	784060	3	P12273	P12273	Prolactin-inducible protein	PIP
0	0	0	89832	0	0	1	1	1	2.9	2.9	2.9	39.802	0.036842	0.67955	68612	0	P48426-2;P48426	P48426-2;P48426	Phosphatidylinositol 5-phosphate 4-kinase type-2 alpha	PIP4K2A
0	0	0	0	0	0	1	1	1	2.1	2.1	2.1	58.061	0.053156	0.50957	0	1	P14618-2;P14618	P14618-2;P14618	Pyruvate kinase PKM	PKM
0	0	0	19841000	0	0	1	1	1	6.3	6.3	6.3	15.989	0.049223	0.44751	15154000	0	Q9NZK7	Q9NZK7	Group IIE secretory phospholipase A2	PLA2G2E
0	0	0	59116	0	0	1	1	1	2	2	2	55.909	0.051587	0.56039	67500	1	Q6DJT9	Q6DJT9	Zinc finger protein PLAG1	PLAG1
0	0	549820	0	0	0	1	1	1	0.5	0.5	0.5	184.86	0.04955	0.59859	1450600	2	Q4KWH8-2;Q4KWH8	Q4KWH8-2;Q4KWH8	1-phosphatidylinositol 4,5-bisphosphate phosphodiesterase eta-1	PLCH1
0	0	0	0	0	73207	1	1	1	2.4	2.4	2.4	41.864	0.050239	0.4325	486190	0	Q86V59-2;Q86V59	Q86V59-2;Q86V59	PNMA-like protein 1	PNMAL1
0	0	0	0	0	0	6	1	1	7.1	1.6	1.6	121.44	0.039773	0.71532	0	1	A5A3E0;P0CG38;P0CG39;A0A0A6YYL3;B2RU33;H3BUK9;A0JP26-3;A0JP26;Q86YR6	A5A3E0;P0CG38;P0CG39	POTE ankyrin domain family member F;POTE ankyrin domain family member I;POTE ankyrin domain family member J	POTEF;POTEI;POTEJ
0	0	0	872400	0	0	1	1	1	1.7	1.7	1.7	110.33	0.047297	0.82902	666330	1	Q86YN6-4;Q86YN6-2;Q86YN6-3;Q86YN6	Q86YN6-4;Q86YN6-2;Q86YN6-3;Q86YN6	Peroxisome proliferator-activated receptor gamma coactivator 1-beta	PPARGC1B
976350	0	0	0	0	0	1	1	1	2.2	2.2	2.2	69.014	0	1.245	976350	1	O14830-2;O14830	O14830-2;O14830	Serine/threonine-protein phosphatase with EF-hands 2	PPEF2
271850	0	0	0	0	0	1	1	1	5.8	5.8	5.8	16.541	0.047619	0.46952	271850	1	P30405-2;P30405	P30405-2;P30405	Peptidyl-prolyl cis-trans isomerase F, mitochondrial	PPIF
4614900	0	0	0	0	0	1	1	1	2.2	2.2	2.2	56.878	0.048159	0.47194	4614900	1	P53041	P53041	Serine/threonine-protein phosphatase 5	PPP5C
0	0	87828	0	0	0	1	1	1	8	8	8	22.11	0.0079365	1.0072	131100	1	Q06830	Q06830	Peroxiredoxin-1	PRDX1
174490	0	0	0	0	0	1	1	1	0.2	0.2	0.2	465.5	0	1.3256	174490	0	P78527-2;P78527	P78527-2;P78527	DNA-dependent protein kinase catalytic subunit	PRKDC
0	0	0	620450	0	0	1	1	1	2.1	2.1	2.1	44.184	0.052308	0.49477	473890	1	Q13976-3;Q13976;Q13976-2	Q13976-3;Q13976;Q13976-2	cGMP-dependent protein kinase 1	PRKG1
0	0	19900000	0	0	4593200	13	13	13	22.4	22.4	22.4	72.683	0	100.2	33526000	29	O14744;O14744-5;O14744-2;O14744-3;O14744-4	O14744;O14744-5;O14744-2;O14744-3;O14744-4	Protein arginine N-methyltransferase 5;Protein arginine N-methyltransferase 5, N-terminally processed	PRMT5
0	0	35770	0	0	0	1	1	1	7.9	7.9	7.9	56.197	0.048969	0.44651	53394	0	O43272-2;O43272-1;O43272	O43272-2;O43272-1;O43272	Proline dehydrogenase 1, mitochondrial	PRODH
370020	0	0	0	0	0	1	1	1	7.2	7.2	7.2	32.811	0.037433	0.69453	370020	1	Q569H4	Q569H4	Protein Largen	PRR16
0	0	4275700	0	0	9763900	2	2	2	12.1	12.1	12.1	26.558	0	33.298	14909000	5	CON__P07477;P07477;Q8NHM4;P07478	CON__P07477;P07477;Q8NHM4;P07478	Trypsin-1;Alpha-trypsin chain 1;Alpha-trypsin chain 2;Putative trypsin-6;Trypsin-2	PRSS1;PRSS3P2;PRSS2
0	0	0	421220	0	0	1	1	1	5.4	5.4	5.4	25.924	0.0087719	1.0838	426440	1	P35030-5;P35030-3;P35030-2;P35030-4;P35030	P35030-5;P35030-3;P35030-2;P35030-4;P35030	Trypsin-3	PRSS3
21586000	0	0	0	0	0	1	1	1	1.1	1.1	1.1	274.93	0.041176	0.72384	21586000	1	Q12923-3;Q12923;Q12923-4	Q12923-3;Q12923;Q12923-4	Tyrosine-protein phosphatase non-receptor type 13	PTPN13
0	0	0	2622500	0	0	1	1	1	0.6	0.6	0.6	178.97	0	1.4007	2003000	0	Q9H3S7	Q9H3S7	Tyrosine-protein phosphatase non-receptor type 23	PTPN23
0	0	0	132240	0	0	1	1	1	4.1	4.1	4.1	35.232	0.047826	0.58717	621460	1	Q96PU8-5;Q96PU8-9;Q96PU8-8;Q96PU8-6;Q96PU8-3;Q96PU8	Q96PU8-5;Q96PU8-9;Q96PU8-8;Q96PU8-6;Q96PU8-3;Q96PU8	Protein quaking	QKI
1553900	0	0	0	0	0	1	1	1	2.6	2.6	2.6	70.414	0.050725	0.5309	1553900	1	Q9BXF6	Q9BXF6	Rab11 family-interacting protein 5	RAB11FIP5
0	0	0	479700	0	0	1	1	1	3.4	3.4	3.4	56.222	0.049383	0.43836	689250	1	Q9NS91	Q9NS91	E3 ubiquitin-protein ligase RAD18	RAD18
0	0	0	2245300	0	0	1	1	1	2.4	2.4	2.4	73.361	0.053797	0.49869	6863700	1	P47736;P47736-2;P47736-3;P47736-4	P47736;P47736-2;P47736-3;P47736-4	Rap1 GTPase-activating protein 1	RAP1GAP
0	0	0	0	0	1514900	1	1	1	2.8	2.8	2.8	50.32	0.048346	0.44381	1645300	1	Q0VAM2-2;Q0VAM2-3;Q0VAM2	Q0VAM2-2;Q0VAM2-3;Q0VAM2	Ras-GEF domain-containing family member 1B	RASGEF1B
0	0	0	3305500	0	0	1	1	1	6.7	6.7	6.7	31.226	0.04797	0.53628	2524700	1	Q9NS23-4;Q9NS23-2;Q9NS23-5;Q9NS23	Q9NS23-4;Q9NS23-2;Q9NS23-5;Q9NS23	Ras association domain-containing protein 1	RASSF1
0	0	132790	0	0	0	1	1	1	2.1	2.1	2.1	48.564	0.046575	0.46249	198220	0	P42696	P42696	RNA-binding protein 34	RBM34
0	0	0	0	0	710450	1	1	1	14.4	14.4	14.4	23.01	0	1.1127	752840	4	P02753	P02753	Retinol-binding protein 4;Plasma retinol-binding protein(1-182);Plasma retinol-binding protein(1-181);Plasma retinol-binding protein(1-179);Plasma retinol-binding protein(1-176)	RBP4
0	0	184810000	0	0	0	1	1	1	1	1	1	196.66	0.0078125	1.0005	275870000	6	P0DJD0	P0DJD0	RANBP2-like and GRIP domain-containing protein 1	RGPD1
0	0	0	76270	0	0	1	1	1	1.2	1.2	1.2	76.992	0.043689	0.62586	213580	0	Q8IUC4	Q8IUC4	Rhophilin-2	RHPN2
0	0	0	1373700	0	0	1	1	1	3	3	3	148.21	0.05414	0.5006	5414800	1	Q6F5E8-2;Q6F5E8	Q6F5E8-2;Q6F5E8	Leucine-rich repeat-containing protein 16C	RLTPR
0	0	0	153730	0	0	1	1	1	0.9	0.9	0.9	107.9	0.055363	0.51638	198590	1	Q6ZNA4-2;Q6ZNA4;Q6ZNA4-4;Q6ZNA4-3	Q6ZNA4-2;Q6ZNA4;Q6ZNA4-4;Q6ZNA4-3	E3 ubiquitin-protein ligase Arkadia	RNF111
179370	0	0	0	0	0	1	1	1	1	1	1	142.79	0.048518	0.45531	179370	1	Q68CZ1-2;Q68CZ1	Q68CZ1-2;Q68CZ1	Protein fantom	RPGRIP1L
0	0	0	0	0	0	1	1	1	5.2	5.2	5.2	24.261	0	8.2583	0	1	P26373	P26373	60S ribosomal protein L13	RPL13
0	0	0	52275	0	0	1	1	1	6.2	6.2	6.2	16.717	0.056738	0.51971	342770	1	P61313-2;P61313	P61313-2;P61313	60S ribosomal protein L15	RPL15
0	0	0	119320	0	0	1	1	1	5.5	5.5	5.5	17.256	0.053628	0.49744	181620	1	Q9UNX3;P61254	Q9UNX3;P61254	60S ribosomal protein L26-like 1;60S ribosomal protein L26	RPL26L1;RPL26
0	0	0	134870	0	0	1	1	1	15.9	15.9	15.9	7.888	0.050445	0.48573	359570	1	P46779-4;P46779-5;P46779;P46779-2;P46779-3	P46779-4;P46779-5;P46779;P46779-2;P46779-3	60S ribosomal protein L28	RPL28
0	0	0	85373	0	0	1	1	1	9.6	9.6	9.6	15.86	0.028571	0.9136	291450	1	P62910	P62910	60S ribosomal protein L32	RPL32
0	0	0	0	0	48471	1	1	1	4.9	4.9	4.9	29.995	0.049479	0.44763	212710	1	P62424	P62424	60S ribosomal protein L7a	RPL7A
0	0	115840	0	0	0	1	1	1	4.3	4.3	4.3	28.024	0.052	0.56564	172920	1	P62917	P62917	60S ribosomal protein L8	RPL8
0	0	0	0	10162000	0	1	1	1	28.1	28.1	28.1	11.514	0.029412	0.94904	167480	1	P05386	P05386	60S acidic ribosomal protein P1	RPLP1
534310	0	0	0	0	0	3	3	3	18.4	18.4	18.4	17.718	0	7.7433	1164400	2	P62269	P62269	40S ribosomal protein S18	RPS18
1093500	0	1225300	0	0	381130	2	2	2	19.3	19.3	19.3	13.373	0	3.0381	3199100	6	P60866;P60866-2	P60866;P60866-2	40S ribosomal protein S20	RPS20
0	0	112990	0	0	0	1	1	1	17.4	17.4	17.4	7.8409	0.046083	0.60669	168670	1	P62857	P62857	40S ribosomal protein S28	RPS28
0	0	0	0	0	14642	1	1	1	5.3	5.3	5.3	26.688	0.055016	0.50384	142850	1	P23396;P23396-2	P23396;P23396-2	40S ribosomal protein S3	RPS3
675220	0	0	0	0	0	1	1	1	3.6	3.6	3.6	28.68	0.05	0.59952	675220	0	P62753	P62753	40S ribosomal protein S6	RPS6
0	0	0	0	0	40969	1	1	1	6.2	6.2	6.2	24.205	0.038251	0.70442	230030	1	P62241	P62241	40S ribosomal protein S8	RPS8
39122000	0	0	0	0	0	1	1	1	17.8	17.8	17.8	11.728	0.049751	0.43854	39122000	1	P26447	P26447	Protein S100-A4	S100A4
430410	0	0	0	0	0	2	2	2	22.8	22.8	22.8	11.471	0	1.5389	583260	2	P31151;Q86SG5	P31151;Q86SG5	Protein S100-A7;Protein S100-A7A	S100A7;S100A7A
562770	0	0	721860	0	0	2	2	2	23.7	23.7	23.7	10.834	0	3.1747	1108000	2	P05109	P05109	Protein S100-A8;Protein S100-A8, N-terminally processed	S100A8
638120	0	0	1060000	0	0	4	4	4	43.9	43.9	43.9	13.242	0	25.349	1566800	4	P06702	P06702	Protein S100-A9	S100A9
890710	0	0	0	0	0	1	1	1	1.7	1.7	1.7	61.236	0.047753	0.47057	890710	1	Q8N6K7;Q8N6K7-3	Q8N6K7;Q8N6K7-3	Sterile alpha motif domain-containing protein 3	SAMD3
0	0	0	170750	0	0	1	1	1	1.1	1.1	1.1	90.254	0	1.58	144770	1	O43290	O43290	U4/U6.U5 tri-snRNP-associated protein 1	SART1
0	0	0	56827	0	0	1	1	1	6.1	6.1	6.1	60.54	0.050378	0.44126	114670	1	Q6UWP8	Q6UWP8	Suprabasin	SBSN
0	0	0	0	0	0	1	1	1	4.1	4.1	4.1	53.005	0.044304	0.76079	0	1	Q8WXD2	Q8WXD2	Secretogranin-3	SCG3
0	0	0	928090	0	0	1	1	1	1	1	1	211.18	0.039604	0.64081	3505000	7	Q58EX2-2;Q58EX2-3;Q58EX2;Q58EX2-4	Q58EX2-2;Q58EX2-3;Q58EX2;Q58EX2-4	Protein sidekick-2	SDK2
0	0	0	0	0	19098000	1	1	1	0.9	0.9	0.9	247.24	0.042683	0.74387	286410000	3	O15027-2;O15027-4;O15027-3;O15027;O15027-5	O15027-2;O15027-4;O15027-3;O15027;O15027-5	Protein transport protein Sec16A	SEC16A
342710000	0	0	0	0	0	1	1	1	7.3	7.3	7.3	38.181	0.051471	0.5333	342710000	1	P53992-2;P53992	P53992-2;P53992	Protein transport protein Sec24C	SEC24C
0	0	0	0	0	1275700	1	1	1	1.5	1.5	1.5	87.392	0.049275	0.48011	5802700	1	Q96T21-2;Q96T21-3;Q96T21	Q96T21-2;Q96T21-3;Q96T21	Selenocysteine insertion sequence-binding protein 2	SECISBP2
20994000	0	0	0	0	0	1	1	1	1.9	1.9	1.9	111.76	0.042169	0.72973	20994000	2	Q68CR1-3;Q68CR1-2;Q68CR1	Q68CR1-3;Q68CR1-2;Q68CR1	Protein sel-1 homolog 3	SEL1L3
0	0	1520100	0	0	7004800	6	6	6	21.8	21.8	21.8	46.736	0	5.6774	5682300	16	P01009;P01009-2;P01009-3	P01009;P01009-2;P01009-3	Alpha-1-antitrypsin;Short peptide from AAT	SERPINA1
0	0	0	0	2620000	0	1	1	1	2.1	2.1	2.1	81.677	0.056537	0.51949	292820	1	Q15459-2;Q15459	Q15459-2;Q15459	Splicing factor 3A subunit 1	SF3A1
0	0	0	0	0	0	1	1	1	3.1	3.1	3.1	44.385	0.043478	0.62559	0	1	Q15427	Q15427	Splicing factor 3B subunit 4	SF3B4
0	0	0	0	0	157930	1	1	1	6.5	6.5	6.5	28.229	0.055556	0.50568	825700	1	Q562F6-3;Q562F6-2;Q562F6	Q562F6-3;Q562F6-2;Q562F6	Shugoshin-like 2	SGOL2
86220000	0	0	0	0	0	1	1	1	2.2	2.2	2.2	80.13	0.045872	0.60237	86220000	2	Q5HYK7-3;Q5HYK7-2;Q5HYK7	Q5HYK7-3;Q5HYK7-2;Q5HYK7	SH3 domain-containing protein 19	SH3D19
0	0	0	0	0	143100	1	1	1	3.1	3.1	3.1	31.72	0.042857	0.61644	484480	0	P04278-4;P04278-5;P04278	P04278-4;P04278-5;P04278	Sex hormone-binding globulin	SHBG
0	0	131890	0	0	0	1	1	1	4.7	4.7	4.7	60.248	0.047091	0.46698	196880	1	Q9BZQ2-2;Q9BZQ2	Q9BZQ2-2;Q9BZQ2	SHC SH2 domain-binding protein 1-like protein	SHCBP1L
0	0	0	0	0	10354000	1	1	1	0.8	0.8	0.8	125.99	0.052209	0.56572	7730400	1	Q9UHW9-3;Q9UHW9	Q9UHW9-3;Q9UHW9	Solute carrier family 12 member 6	SLC12A6
239120	0	0	0	0	0	2	2	2	6.4	6.4	6.4	32.852	0.0081967	1.0341	295460	2	P05141;P12236;P12235	P05141;P12236;P12235	ADP/ATP translocase 2;ADP/ATP translocase 2, N-terminally processed;ADP/ATP translocase 3;ADP/ATP translocase 3, N-terminally processed;ADP/ATP translocase 1	SLC25A5;SLC25A6;SLC25A4
0	0	0	1184700	0	0	1	1	1	1.3	1.3	1.3	156.76	0.05	0.48378	904860	1	O75094-2;O75094-3;O75094;O75094-4	O75094-2;O75094-3;O75094;O75094-4	Slit homolog 3 protein	SLIT3
0	0	0	0	0	0	1	1	1	1.8	1.8	1.8	89.143	0	2.5523	0	7	Q8TEQ0-2;Q8TEQ0	Q8TEQ0-2;Q8TEQ0	Sorting nexin-29	SNX29
0	4462100	0	0	0	0	1	1	1	0.4	0.4	0.4	251.74	0.049296	0.42779	57041	0	Q6Q759	Q6Q759	Sperm-associated antigen 17	SPAG17
0	0	0	883480	0	0	1	1	1	3.3	3.3	3.3	30.38	0.048851	0.47887	789600	1	Q8NHS9-3;Q8NHS9-2;Q8NHS9	Q8NHS9-3;Q8NHS9-2;Q8NHS9	Spermatogenesis-associated protein 22	SPATA22
0	0	0	3663900	0	0	1	1	1	13.9	13.9	13.9	17.315	0.037037	0.68355	2798400	2	Q8NBT2-2;Q8NBT2	Q8NBT2-2;Q8NBT2	Kinetochore protein Spc24	SPC24
0	0	0	0	0	59890	1	1	1	0.8	0.8	0.8	120.87	0.054839	0.50354	358580	0	O75044	O75044	SLIT-ROBO Rho GTPase-activating protein 2	SRGAP2
557510	0	0	399560	0	0	2	2	2	0.9	0.9	0.9	299.61	0	1.6634	861070	2	Q9UQ35;Q9UQ35-2	Q9UQ35;Q9UQ35-2	Serine/arginine repetitive matrix protein 2	SRRM2
0	0	0	0	0	122190	2	2	2	19.7	19.7	19.7	15.257	0.0082645	1.0347	1045100	2	Q16629-3;Q16629-2;Q16629-4;Q16629;P84103-2;P84103	Q16629-3;Q16629-2;Q16629-4;Q16629;P84103-2;P84103	Serine/arginine-rich splicing factor 7;Serine/arginine-rich splicing factor 3	SRSF7;SRSF3
0	0	0	0	0	2368600	1	1	1	3	3	3	86.017	0.035533	0.65583	5230700	1	Q9ULQ0-2;Q9ULQ0	Q9ULQ0-2;Q9ULQ0	Striatin-interacting protein 2	STRIP2
1210700	0	0	0	0	0	1	1	1	9	9	9	29.887	0.049738	0.4484	1210700	1	Q13190-3;Q13190-2;Q13190-4;Q13190	Q13190-3;Q13190-2;Q13190-4;Q13190	Syntaxin-5	STX5
0	0	0	0	0	21793000	1	1	1	1.3	1.3	1.3	114.19	0	1.1966	44423000	4	Q15431	Q15431	Synaptonemal complex protein 1	SYCP1
0	0	0	48979	0	0	1	1	1	3.4	3.4	3.4	27.728	0.05	0.43916	37410	0	Q8IZU3	Q8IZU3	Synaptonemal complex protein 3	SYCP3
0	0	46322000	0	0	0	1	1	1	0.2	0.2	0.2	642.66	0.05	0.57603	69145000	1	Q8NF91-7;Q8NF91-4;Q8NF91	Q8NF91-7;Q8NF91-4;Q8NF91	Nesprin-1	SYNE1
0	0	0	2629000	0	0	1	1	1	1.5	1.5	1.5	68.559	0.056106	0.50865	2008000	1	Q4VX76	Q4VX76	Synaptotagmin-like protein 3	SYTL3
281070	0	0	0	0	0	1	1	1	1	1	1	90.359	0.055749	0.51718	281070	1	Q9Y6A5	Q9Y6A5	Transforming acidic coiled-coil-containing protein 3	TACC3
0	0	0	0	0	0	1	1	1	2	2	2	76.326	0.034014	0.84758	0	3	Q3MII6	Q3MII6	TBC1 domain family member 25	TBC1D25
0	0	0	0	0	64253	1	1	1	3.1	3.1	3.1	33.382	0.049853	0.48211	69543	0	Q8IZP1-2;Q8IZP1;Q6IPX1;Q6DHY5;P0C7X1;B9A6J9;A6NER0;A6NDS4;A0A087X1G2;A0A087X179;A0A087WXS9;A0A087WVF3	Q8IZP1-2;Q8IZP1;Q6IPX1;Q6DHY5;P0C7X1;B9A6J9;A6NER0;A6NDS4;A0A087X1G2;A0A087X179;A0A087WXS9;A0A087WVF3	TBC1 domain family member 3;TBC1 domain family member 3C;TBC1 domain family member 3G;TBC1 domain family member 3H;TBC1 domain family member 3L;TBC1 domain family member 3F;TBC1 domain family member 3B;TBC1 domain family member 3K;TBC1 domain family member 3E;TBC1 domain family member 3I;TBC1 domain family member 3D	TBC1D3;TBC1D3C;TBC1D3G;TBC1D3H;TBC1D3L;TBC1D3F;TBC1D3B;TBC1D3K;TBC1D3E;TBC1D3I;TBC1D3D
0	3491000	0	0	0	0	1	1	1	2.2	2.2	2.2	52.263	0.0076923	0.99065	44627	0	Q9NVR7-2;Q9NVR7	Q9NVR7-2;Q9NVR7	TBCC domain-containing protein 1	TBCCD1
0	0	3131200	0	0	10693000	12	12	12	27.1	27.1	27.1	77.063	0	28.172	13167000	23	P02787;CON__Q2HJF0;CON__Q29443;CON__Q0IIK2	P02787	Serotransferrin	TF
0	0	0	0	0	0	1	1	1	1.2	1.2	1.2	76.226	0	1.4473	0	6	Q7Z3E1	Q7Z3E1	TCDD-inducible poly [ADP-ribose] polymerase	TIPARP
0	0	0	143970	0	0	1	1	1	10.7	10.7	10.7	43.364	0.042654	0.61556	109960	0	O76062-2;O76062	O76062-2;O76062	Delta(14)-sterol reductase	TM7SF2
0	0	11144	0	0	0	1	1	1	1.3	1.3	1.3	63.927	0.055195	0.50454	152400	1	A6NKL6	A6NKL6	Transmembrane protein 200C	TMEM200C
0	0	177150	0	0	0	1	1	1	8.2	8.2	8.2	55.432	0.049587	0.57453	264440	0	Q9H330-4;Q9H330	Q9H330-4;Q9H330	Transmembrane protein 245	TMEM245
0	0	0	3944500	0	0	1	1	1	2	2	2	103.59	0.051205	0.48794	5815500	1	Q5HYA8-3;Q5HYA8	Q5HYA8-3;Q5HYA8	Meckelin	TMEM67
0	0	0	214020	0	0	1	1	1	2.8	2.8	2.8	56.773	0.04661	0.57959	163470	1	Q8NBN3-3;Q8NBN3	Q8NBN3-3;Q8NBN3	Transmembrane protein 87A	TMEM87A
222700	0	0	0	0	0	1	1	1	3.1	3.1	3.1	39.594	0.0084034	1.0719	222700	1	Q9NYL9	Q9NYL9	Tropomodulin-3	TMOD3
493600	0	0	0	0	0	1	1	1	3.8	3.8	3.8	112.93	0.047486	0.46945	493600	0	P98073	P98073	Enteropeptidase;Enteropeptidase non-catalytic heavy chain;Enteropeptidase catalytic light chain	TMPRSS15
0	0	0	149020	0	0	1	1	1	25	25	25	5.0526	0.046832	0.46497	173270	1	P62328	P62328	Thymosin beta-4;Hematopoietic system regulatory peptide	TMSB4X
2913300	0	0	0	0	0	1	1	1	1.7	1.7	1.7	61.569	0	3.163	2913300	0	Q15025-7;Q15025-8;Q15025-5;Q15025-6;Q15025-4;Q15025-3;Q15025-2;Q15025	Q15025-7;Q15025-8;Q15025-5;Q15025-6;Q15025-4;Q15025-3;Q15025-2;Q15025	TNFAIP3-interacting protein 1	TNIP1
0	0	0	685340	0	0	1	1	1	6.4	6.4	6.4	21.692	0.046961	0.46578	523460	1	P19237	P19237	Troponin I, slow skeletal muscle	TNNI1
0	0	0	340850	0	0	1	1	1	0.5	0.5	0.5	175.96	0.048951	0.4258	361820	0	Q9HCJ0;Q9HCJ0-2	Q9HCJ0;Q9HCJ0-2	Trinucleotide repeat-containing gene 6C protein	TNRC6C
0	0	0	0	0	11241000	1	1	1	1.7	1.7	1.7	101.21	0.04943	0.54784	12057000	2	Q13472-3;Q13472-2;Q13472	Q13472-3;Q13472-2;Q13472	DNA topoisomerase 3-alpha	TOP3A
0	0	0	0	0	41875	1	1	1	0.9	0.9	0.9	101.42	0.048843	0.44575	98739	0	O60296	O60296	Trafficking kinesin-binding protein 2	TRAK2
0	0	62510	0	0	0	1	1	1	1.9	1.9	1.9	54.169	0.052632	0.4959	93310	1	P19474	P19474	E3 ubiquitin-protein ligase TRIM21	TRIM21
2807000	0	0	0	0	0	1	1	1	0.5	0.5	0.5	227.58	0	1.2361	2807000	1	Q15643	Q15643	Thyroid receptor-interacting protein 11	TRIP11
2743300	0	0	0	0	0	1	1	1	0.8	0.8	0.8	192.07	0.037234	0.68427	2743300	1	Q14669-4;Q14669;Q14669-2;Q14669-3	Q14669-4;Q14669;Q14669-2;Q14669-3	E3 ubiquitin-protein ligase TRIP12	TRIP12
0	0	0	117550	0	0	1	1	1	1.7	1.7	1.7	60.468	0.04914	0.43738	89780	0	A0AVF1-3;A0AVF1	A0AVF1-3;A0AVF1	Intraflagellar transport protein 56	TTC26
0	0	976140	0	0	269360	4	4	4	17	17	17	37.217	0	4.2955	1878100	5	P68363-2;Q71U36-2;Q9BQE3;Q71U36;P68363;P0DPH7-2;P0DPH8;P0DPH7;Q6PEY2;Q9NY65-2;P68366-2;P68366;Q9NY65	P68363-2;Q71U36-2;Q9BQE3;Q71U36;P68363;P0DPH7-2;P0DPH8;P0DPH7;Q6PEY2	Tubulin alpha-1B chain;Tubulin alpha-1A chain;Tubulin alpha-1C chain;Tubulin alpha-3E chain	TUBA1B;TUBA1A;TUBA1C;TUBA3E
0	0	478440	0	0	99221	2	2	2	7.4	7.4	7.4	49.67	0.008547	1.0747	762830	2	P07437;Q13509-2;Q9BVA1;Q13885;P68371;Q13509	P07437;Q13509-2;Q9BVA1;Q13885;P68371;Q13509	Tubulin beta chain;Tubulin beta-3 chain;Tubulin beta-2B chain;Tubulin beta-2A chain;Tubulin beta-4B chain	TUBB5;TUBB3;TUBB2B;TUBB2A;TUBB4B
0	0	0	1321300	0	0	1	1	1	1.8	1.8	1.8	88.09	0.048571	0.47633	4385000	1	Q9BSJ2-3;Q9BSJ2;Q9BSJ2-4	Q9BSJ2-3;Q9BSJ2;Q9BSJ2-4	Gamma-tubulin complex component 2	TUBGCP2
0	0	0	119070	0	0	1	1	1	3.3	3.3	3.3	37.432	0.04023	0.72037	90942	0	Q3B726	Q3B726	DNA-directed RNA polymerase I subunit RPA43	TWISTNB
0	0	0	0	0	227990	1	1	1	15.3	15.3	15.3	9.4519	0.042424	0.7358	487900	1	P10599-2;P10599	P10599-2;P10599	Thioredoxin	TXN
996700	0	0	890950	0	0	2	2	2	19.5	19.5	19.5	14.728	0	7.7306	1674100	2	P62987;P62979;P0CG47;P0CG48	P62987;P62979;P0CG47;P0CG48	Ubiquitin-60S ribosomal protein L40;Ubiquitin;60S ribosomal protein L40;Ubiquitin-40S ribosomal protein S27a;Ubiquitin;40S ribosomal protein S27a;Polyubiquitin-B;Ubiquitin;Polyubiquitin-C;Ubiquitin	UBA52;RPS27A;UBB;UBC
0	0	0	0	0	0	1	1	1	0.8	0.8	0.8	117.11	0.049793	0.5756	0	1	Q5T6F2	Q5T6F2	Ubiquitin-associated protein 2	UBAP2
0	0	0	969020	0	0	1	1	1	11.1	11.1	11.1	13.157	0.051383	0.56024	879530	1	O95164	O95164	Ubiquitin-like protein 3	UBL3
0	0	0	0	0	429770	1	1	1	2.8	2.8	2.8	46.134	0.054487	0.50135	13769000	2	P0CB47	P0CB47	Putative upstream-binding factor 1-like protein 1	UBTFL1
0	0	0	0	0	637590	1	1	1	1.8	1.8	1.8	58.396	0.05122	0.43597	669060	0	Q9Y5T5-4;Q9Y5T5-3;Q9Y5T5-2;Q9Y5T5	Q9Y5T5-4;Q9Y5T5-3;Q9Y5T5-2;Q9Y5T5	Ubiquitin carboxyl-terminal hydrolase 16	USP16
0	0	0	635320	0	0	1	1	1	2.2	2.2	2.2	67.61	0.049808	0.55087	3330800	1	Q96AX1	Q96AX1	Vacuolar protein sorting-associated protein 33A	VPS33A
0	0	0	0	0	0	1	1	1	1.7	1.7	1.7	61.983	0.05136	0.48967	0	1	Q9NRW7-2;Q9NRW7	Q9NRW7-2;Q9NRW7	Vacuolar protein sorting-associated protein 45	VPS45
0	0	60087	0	0	0	1	1	1	1.5	1.5	1.5	68.495	0.048387	0.42342	89694	0	Q8N1B4-2;Q8N1B4	Q8N1B4-2;Q8N1B4	Vacuolar protein sorting-associated protein 52 homolog	VPS52
0	0	1435600	0	0	0	2	2	2	8.5	8.5	8.5	36.724	0	7.8705	2267200	2	Q9BQA1;Q9BQA1-2	Q9BQA1;Q9BQA1-2	Methylosome protein 50	WDR77
0	0	0	0	0	4633600	1	1	1	2.6	2.6	2.6	29.616	0.052147	0.49387	4868900	1	Q401N2-2;Q401N2	Q401N2-2;Q401N2	Zinc-activated ligand-gated ion channel	ZACN
0	0	0	0	0	0	1	1	1	1.9	1.9	1.9	110.54	0.028777	0.91852	0	1	Q8IWR0	Q8IWR0	Zinc finger CCCH domain-containing protein 7A	ZC3H7A
215860000	0	0	0	0	0	1	1	1	3.4	3.4	3.4	42.106	0	1.1166	215860000	5	Q9UJ78-1;Q9UJ78-5;Q9UJ78	Q9UJ78-1;Q9UJ78-5;Q9UJ78	Zinc finger MYM-type protein 5	ZMYM5
0	0	0	0	0	370300	1	1	1	3.7	3.7	3.7	59.849	0.047354	0.46941	4746300	1	Q8N554-2;Q8N554	Q8N554-2;Q8N554	Zinc finger protein 276	ZNF276
0	0	120280	0	0	0	1	1	1	1.2	1.2	1.2	85.107	0.049412	0.42826	179540	0	Q8N895	Q8N895	Zinc finger protein 366	ZNF366
0	0	3538800	0	0	0	1	1	1	3	3	3	65.864	0.055738	0.50661	5282500	1	Q6P280	Q6P280	Zinc finger protein 529	ZNF529
0	0	0	0	0	1349800	1	1	1	3.4	3.4	3.4	62.329	0.049351	0.44763	1334200	1	Q96NI8	Q96NI8	Zinc finger protein 570	ZNF570
0	0	66806	0	0	0	1	1	1	0.8	0.8	0.8	145.02	0.050481	0.43343	99722	0	A6NN14	A6NN14	Zinc finger protein 729	ZNF729
42758000	0	0	0	0	0	1	1	1	18.6	18.6	18.6	6.7238	0.055944	0.51743	42758000	1	Q96AP4-2;Q96AP4	Q96AP4-2;Q96AP4	Zinc finger with UFM1-specific peptidase domain protein	ZUFSP
0	0	0	0	0	2578600	1	1	1	6.5	6.5	6.5	11.945	0.045752	0.78355	1341700	1	A0A1B0GTR4	A0A1B0GTR4
0	0	0	0	685350	0	1	1	1	1.2	1.2	1.2	88.936	0.048387	0.455	94920	1	A0A1B0GTU1	A0A1B0GTU1
0	0	0	865620	0	0	1	1	1	9.5	9.5	9.5	26.768	0.048223	0.44366	4848600	1	A0A1B0GWB2	A0A1B0GWB2
0	0	0	92789000	0	0	1	1	1	3.1	3.1	3.1	58.653	0.0080645	1.0253	70871000	1	Q86194;B3SRR2	Q86194;B3SRR2
14779000	0	0	0	0	0	11	2	1	23.8	4.8	1.9	47.117	0	37.326	14779000	3	CON__A2A5Y0;CON__O76014;O76014	CON__A2A5Y0
358430000	125940000	563770000	586160000	62180000	1356400000	4	4	4	25.1	25.1	25.1	24.409	0	323.31	2407200000	103	CON__P00761	CON__P00761
0	0	4318500	0	0	9727000	3	3	3	18.6	18.6	18.6	22.975	0	28.571	11938000	13	CON__P02662	CON__P02662
0	0	0	0	0	1000000	1	1	1	5.3	5.3	5.3	24.348	0	2.1296	1021400	3	CON__P02663	CON__P02663
0	0	391500	0	0	787750	2	2	2	17.8	17.8	17.8	18.974	0	1.6126	991530	2	CON__P02668	CON__P02668
0	0	0	0	0	554560	1	1	1	6.8	6.8	6.8	18.281	0.0084746	1.0742	678520	2	CON__P02754	CON__P02754
50611000	200650000	10129000	38049000	30384000	18514000	30	30	26	53.7	53.7	48.6	69.293	0	323.31	115170000	250	CON__P02769	CON__P02769
2451200	0	0	13960000	0	0	28	2	0	47.9	4.8	0	59.998	0	3.8066	13002000	3	CON__P04259	CON__P04259
11597000	0	0	0	0	0	4	1	1	8	2.6	2.6	47.538	0.04	0.64922	12694000	2	CON__P05784	CON__P05784
0	0	0	0	0	1996300	10	1	1	16.6	1.5	1.5	49.586	0.050909	0.53092	1390000	1	CON__P13646-1	CON__P13646-1
0	0	0	7032200	0	0	1	1	1	2.9	2.9	2.9	26.59	0.049057	0.54157	5371100	1	CON__Q05B55	CON__Q05B55
0	0	0	0	0	0	1	1	1	3.4	3.4	3.4	50.327	0.038043	0.70313	0	1	CON__Q2YDI2	CON__Q2YDI2
23304000	0	0	0	0	0	9	3	0	14.5	4.4	0	50.529	0	2.9985	23304000	4	CON__Q497I4	CON__Q497I4
26280000	0	0	0	0	0	15	5	3	25.5	11.5	7.7	52.809	0	87.739	26280000	5	CON__Q61726	CON__Q61726
0	0	0	2821000	0	0	4	1	1	5.6	2.8	2.8	49.034	0.055921	0.50818	4797800	1	CON__Q9D312	CON__Q9D312
6633300	0	0	0	0	0	9	1	0	20.4	1.8	0	44.56	0.044025	0.76061	6633300	1	CON__Q9D646	CON__Q9D646
23261000	0	0	0	0	0	10	1	1	19.3	2.5	2.5	53.728	0.053061	0.57218	23261000	1	CON__REFSEQ:XP_986630	CON__REFSEQ:XP_986630
70322	0	0	0	0	0	1	1	1	8.4	8.4	8.4	29.098	0.048718	0.44441	70322	0	F5HFH0	F5HFH0
0	0	172780	0	0	0	1	1	1	3	3	3	34.372	0.051095	0.53269	400420	0	F5HGN8	F5HGN8
0	0	0	575800	0	0	1	1	1	1.3	1.3	1.3	116.64	0.048889	0.59139	4286200	1	P33793;P20509;O57191	P33793;P20509;O57191
0	0	0	0	0	1341100	1	1	1	3.4	3.4	3.4	64.718	0.029197	0.93683	13004000	2	P21073;O72736	P21073;O72736
0	0	1073200	0	0	0	1	1	1	5.1	5.1	5.1	40.648	0.044335	0.63444	1601900	2	O75177-2	O75177-2
0	0	0	2272300	0	0	1	1	1	8.9	8.9	8.9	22.603	0.050147	0.48469	1735500	1	O91081	O91081
0	3353100	0	0	0	0	1	1	1	2.9	2.9	2.9	35.319	0.047493	0.45022	42864	0	P0C723;P0C722;P03207	P0C723;P0C722;P03207
0	0	104550000	0	0	0	1	1	1	23.6	23.6	23.6	11.531	0.053957	0.52683	156060000	1	P03288	P03288
56127000	0	0	0	0	0	1	1	1	3.3	3.3	3.3	63.453	0.049242	0.54419	56127000	2	P03420	P03420
0	0	0	780020	0	0	1	1	1	3.1	3.1	3.1	62.063	0.053333	0.5107	595770	1	P03461;P10448;P09766;P09767;P09765;P10757;P03464;P03463;P22092;P17504	P03461;P10448;P09766;P09767;P09765;P10757;P03464;P03463;P22092;P17504
0	0	0	0	0	0	1	1	1	1.9	1.9	1.9	95.647	0.049419	0.48134	0	1	P35961;P19549;P05878	P35961;P19549;P05878
0	0	0	0	0	232390	1	1	1	2	2	2	61.251	0.040698	0.72202	352820	0	Q4JQS7;P09253	Q4JQS7;P09253
0	0	0	2963300	0	0	1	1	1	0.2	0.2	0.2	790.24	0.039106	0.71069	21856000	1	P0C6X7	P0C6X7
0	0	0	256510	0	0	1	1	1	8.1	8.1	8.1	16.837	0	1.1501	397950	1	P0DP25;P0DP24;P0DP23	P0DP25;P0DP24;P0DP23
0	0	0	438500	0	0	1	1	1	6.2	6.2	6.2	21.535	0.043478	0.7546	2201400	1	P13612-2	P13612-2
0	0	0	363280	0	0	1	1	1	6.4	6.4	6.4	23.213	0.048276	0.4233	2652400	1	P15200	P15200
0	0	0	0	0	17390	1	1	1	5.9	5.9	5.9	17.188	0.048469	0.44387	9048.4	0	P15830	P15830
0	0	0	0	0	724680	1	1	1	3	3	3	38.196	0.050388	0.55506	5307200	1	P15882-2	P15882-2
0	0	0	75763000	0	0	1	1	1	4.1	4.1	4.1	47.416	0.053512	0.51083	57867000	1	P16810	P16810
396170	0	0	0	0	0	1	1	1	19.4	19.4	19.4	8.3696	0.022901	0.97621	396170	1	P20893-2;P20893	P20893-2;P20893
0	0	0	0	0	261220	1	1	1	5.6	5.6	5.6	26.605	0.0086207	1.0768	2242000	2	P21021	P21021
0	0	0	108210	0	0	1	1	1	2.6	2.6	2.6	39.505	0.049261	0.4383	82651	0	P21075	P21075
0	0	0	0	0	0	1	1	1	1	1	1	126.57	0.047414	0.58381	0	1	P41266;P41265;P21400	P41266;P41265;P21400
0	0	0	0	0	176940	1	1	1	3.5	3.5	3.5	28.508	0.04798	0.44215	243460	0	P22025	P22025
0	0	0	7393900	0	0	1	1	1	2	2	2	56.165	0	1.3847	33001000	0	P27233;P36737	P27233;P36737
0	0	0	0	0	56325000	1	1	1	2	2	2	72.212	0.043269	0.61943	49298000	1	P36728	P36728
0	0	0	2811600	0	0	1	1	1	12.9	12.9	12.9	16.319	0.048023	0.47194	2147500	1	P50777	P50777
0	0	0	743920	0	0	1	1	1	1.2	1.2	1.2	88.134	0.054983	0.51587	578880	1	P51178-2	P51178-2
0	0	0	113130	0	0	1	1	1	1.8	1.8	1.8	62.918	0.049608	0.44826	1341700	1	P54277-4	P54277-4
2639100	0	0	0	0	0	1	1	1	12.3	12.3	12.3	23.218	0.046703	0.46263	2639100	1	Q77TG7;Q76RA8;P68693	Q77TG7;Q76RA8;P68693
562460	0	0	0	0	0	1	1	1	8.7	8.7	8.7	14.107	0.048035	0.58852	562460	1	P68971;P68970	P68971;P68970
7046000	0	0	0	0	0	1	1	1	0.4	0.4	0.4	306.75	0.050847	0.43397	7046000	1	Q03001-3	Q03001-3
0	0	0	0	0	0	1	1	1	3.2	3.2	3.2	31.001	0.048689	0.54122	0	1	Q06609-3	Q06609-3
0	0	0	0	0	3523200	1	1	1	3.7	3.7	3.7	23.839	0.036458	0.67587	4818100	1	Q08499-7;Q08499-12;Q08499-6	Q08499-7;Q08499-12;Q08499-6
3114600	0	0	0	0	0	1	1	1	2.5	2.5	2.5	85.859	0.054608	0.51487	3114600	1	Q0A2G6	Q0A2G6
300500	0	0	0	0	0	1	1	1	0.9	0.9	0.9	92.596	0.048724	0.42488	300500	0	Q14694-2	Q14694-2
274740	0	0	0	0	0	1	1	1	7.1	7.1	7.1	15.82	0.048872	0.54125	274740	1	Q14714-3	Q14714-3
0	0	0	0	0	177300	1	1	1	4.3	4.3	4.3	20.192	0.049563	0.4815	92256	0	Q15329-3	Q15329-3
0	0	0	0	0	138800	1	1	1	1.5	1.5	1.5	69	0.051181	0.55908	72223	0	Q29RF7-3	Q29RF7-3
0	0	0	6428500	0	0	1	1	1	3.5	3.5	3.5	60.66	0.036082	0.66782	16370000	2	Q2HRD4	Q2HRD4
0	0	0	0	0	615710	1	1	1	1.5	1.5	1.5	68.918	0.048991	0.47898	576060	0	Q4G0Z9-4	Q4G0Z9-4
0	0	0	0	0	6094800	1	1	1	0.9	0.9	0.9	102.42	0.048611	0.42488	4033100	0	Q69138	Q69138
0	0	0	0	0	217530	1	1	1	1.7	1.7	1.7	55.284	0.047745	0.45183	171730	0	Q6TUQ9;Q9DHK3	Q6TUQ9;Q9DHK3
0	0	0	0	0	0	1	1	1	5.5	5.5	5.5	16.659	0.02963	0.95505	0	1	Q6ZSN1	Q6ZSN1	Putative uncharacterized protein FLJ45355
0	0	0	869210	0	0	1	1	1	4.5	4.5	4.5	55.874	0.047619	0.58431	7191900	1	Q7L099-2	Q7L099-2
0	0	0	2210300	0	0	1	1	1	2.9	2.9	2.9	32.215	0.046322	0.45995	2441500	1	Q80872	Q80872
0	0	0	52956000	0	0	1	1	1	6.2	6.2	6.2	46.534	0.053459	0.49736	383160000	2	Q80944	Q80944
0	0	0	0	0	0	1	1	1	1.8	1.8	1.8	82.182	0.0077519	0.99217	0	1	Q8IUX7-2	Q8IUX7-2
2838000	0	0	0	0	0	1	1	1	0.6	0.6	0.6	242.67	0.049096	0.44684	2838000	1	Q8JTG9	Q8JTG9
0	0	0	44954000	0	0	1	1	1	8.4	8.4	8.4	20.545	0.042945	0.75069	45837000	3	Q8ND83-3;Q8ND83-2	Q8ND83-3;Q8ND83-2
0	0	0	0	0	3675700	1	1	1	2.4	2.4	2.4	59.365	0.056338	0.51914	3811700	1	Q99592-2	Q99592-2
0	0	0	0	0	635130	1	1	1	1.2	1.2	1.2	81.353	0.049065	0.42666	406280	0	Q9H0E9-3;Q9H0E9-4;Q9H0E9-2	Q9H0E9-3;Q9H0E9-4;Q9H0E9-2
0	0	0	0	0	74616	1	1	1	1.9	1.9	1.9	52.106	0.05036	0.43308	38825	0	Q9H0F5-2	Q9H0F5-2
0	0	0	1510400	0	0	1	1	1	1.5	1.5	1.5	59.697	0.05298	0.50936	5343500	1	Q9NSG2-3	Q9NSG2-3
0	0	0	0	0	1485600	1	1	1	0.5	0.5	0.5	242.98	0.050119	0.43223	773020	1	Q9QSP0	Q9QSP0
0	0	0	0	0	21554000	1	1	1	1.6	1.6	1.6	88.291	0.052846	0.56963	80361000	1	Q9WSV7	Q9WSV7
0	0	0	6986500	0	0	1	1	1	4.2	4.2	4.2	29.423	0.04918	0.42709	10280000	1	Q9Y5W9-2	Q9Y5W9-2
0	0	0	10380000	0	0	1	1	1	0	0	0	50.327	0.034247	0.85532	21232000	1	REV__CON__Q2YDI2	REV__CON__Q2YDI2
0	0	0	0	0	21552000	1	1	1	0	0	0	61.948	0.054152	0.52929	30923000	1	REV__P06726;REV__F5HBC6	REV__P06726;REV__F5HBC6
0	0	0	239810	0	0	1	1	1	0	0	0	75.917	0.05042	0.57735	1863100	1	REV__O43182-3;REV__O43182-2;REV__O43182	REV__O43182-3;REV__O43182-2;REV__O43182
0	0	10461000	0	0	0	1	1	1	0	0	0	102.82	0.051597	0.43683	15615000	1	REV__O43424-2;REV__O43424	REV__O43424-2;REV__O43424
974150	0	0	0	0	0	1	1	1	0	0	0	129.25	0.050505	0.44183	974150	1	REV__P01133-2;REV__P01133-3;REV__P01133	REV__P01133-2;REV__P01133-3;REV__P01133
0	0	0	3170500	0	0	1	1	1	0	0	0	83.978	0.023077	0.98694	8715900	1	REV__P12270-2;REV__P12270	REV__P12270-2;REV__P12270
0	0	0	0	0	380970	2	2	2	0	0	0	317.03	0.047619	0.84292	2659000	2	REV__P21359-2;REV__P21359-6;REV__P21359;REV__P21359-3;REV__P21359-5;REV__P21359-4	REV__P21359-2;REV__P21359-6;REV__P21359;REV__P21359-3;REV__P21359-5;REV__P21359-4
725850	0	0	0	0	0	1	1	1	0	0	0	105.43	0.053279	0.57329	1451700	1	REV__P41594-3;REV__P41594-2;REV__P41594	REV__P41594-3;REV__P41594-2;REV__P41594
0	0	0	177180	0	0	1	1	1	0	0	0	155.02	0.049869	0.44842	288600000	1	REV__P46939-4;REV__P46939;REV__P46939-2	REV__P46939-4;REV__P46939;REV__P46939-2
0	0	0	0	0	0	1	1	1	0	0	0	105.06	0.050228	0.59992	0	3	REV__P48200	REV__P48200
0	0	0	1073000	0	0	1	1	1	0	0	0	239.47	1	-2	22600000	1	REV__P52362	REV__P52362
24159000	0	0	0	0	0	1	1	1	0	0	0	97.031	0.030075	0.96836	24159000	1	REV__P52735-3	REV__P52735-3
0	0	0	299470	0	0	1	1	1	0	0	0	87.247	1	-2	818090	1	REV__Q12959-8;REV__Q12959-9;REV__Q12959-5;REV__Q12959-3;REV__Q12959-6;REV__Q12959-4;REV__Q12959;REV__Q12959-7;REV__Q12959-2	REV__Q12959-8;REV__Q12959-9;REV__Q12959-5;REV__Q12959-3;REV__Q12959-6;REV__Q12959-4;REV__Q12959;REV__Q12959-7;REV__Q12959-2
0	0	0	5091500	0	0	1	1	1	0	0	0	43.555	0.057554	0.52362	3888800	1	REV__Q13133-2;REV__Q13133	REV__Q13133-2;REV__Q13133
0	0	0	0	0	640100	1	1	1	0	0	0	46.404	1	-2	666130	1	REV__Q13363-2;REV__Q13363	REV__Q13363-2;REV__Q13363
0	0	0	0	0	0	1	1	1	0	0	0	32.485	1	-2	0	1	REV__Q13907-2	REV__Q13907-2
0	0	2013700	0	0	0	2	2	2	0	0	0	512.6	0.015385	0.99006	6301700	2	REV__Q15149-7;REV__Q15149-8;REV__Q15149-9;REV__Q15149-5;REV__Q15149-4;REV__Q15149-6;REV__Q15149-3;REV__Q15149-2;REV__Q15149	REV__Q15149-7;REV__Q15149-8;REV__Q15149-9;REV__Q15149-5;REV__Q15149-4;REV__Q15149-6;REV__Q15149-3;REV__Q15149-2;REV__Q15149
0	0	0	158040	0	0	1	1	1	0	0	0	20.934	1	-2	3026100	1	REV__Q6P4E1-3	REV__Q6P4E1-3
0	0	0	841860	0	0	1	1	1	0	0	0	118.65	1	-2	6534000	1	REV__Q6VMQ6-2;REV__Q6VMQ6-5;REV__Q6VMQ6;REV__Q6VMQ6-4	REV__Q6VMQ6-2;REV__Q6VMQ6-5;REV__Q6VMQ6;REV__Q6VMQ6-4
3097900	0	0	0	0	0	1	1	1	0	0	0	117.88	1	-2	3097900	1	REV__Q7RTW8-4;REV__Q7RTW8-5;REV__Q7RTW8	REV__Q7RTW8-4;REV__Q7RTW8-5;REV__Q7RTW8
0	0	0	0	0	0	1	1	1	0	0	0	121.01	1	-2	0	1	REV__Q8TAB3-3;REV__Q8TAB3-2;REV__Q8TAB3	REV__Q8TAB3-3;REV__Q8TAB3-2;REV__Q8TAB3
0	0	1466600	0	0	2215000	2	2	2	0	0	0	74.692	0.040816	0.84292	6338600	2	REV__Q8TC20-2;REV__Q8TC20-4;REV__Q8TC20;REV__Q8TC20-3;REV__Q8TC20-5	REV__Q8TC20-2;REV__Q8TC20-4;REV__Q8TC20;REV__Q8TC20-3;REV__Q8TC20-5
0	0	0	0	0	299570000	1	1	1	0	0	0	111.81	0.051661	0.53374	1025900000	2	REV__Q8WX94;REV__Q8WX94-2;REV__Q8WX94-3	REV__Q8WX94;REV__Q8WX94-2;REV__Q8WX94-3
0	0	0	0	0	0	1	1	1	0	0	0	106.14	1	-2	0	1	REV__Q92833-2;REV__Q92833-3;REV__Q92833	REV__Q92833-2;REV__Q92833-3;REV__Q92833
0	0	0	0	0	0	1	1	1	0	0	0	11.777	0.048913	0.45702	0	1	REV__Q96GU1-2;REV__Q96GU1	REV__Q96GU1-2;REV__Q96GU1
1360400	0	0	0	0	0	1	1	1	0	0	0	43.499	0.056291	0.50932	1360400	1	REV__Q96L03	REV__Q96L03
972280	0	0	0	0	0	1	1	1	0	0	0	167.38	1	-2	972280	1	REV__Q96NW7-2;REV__Q96NW7	REV__Q96NW7-2;REV__Q96NW7
0	0	0	0	0	682570	1	1	1	0	0	0	71.026	1	-2	14992000	1	REV__Q9H0H5	REV__Q9H0H5
0	0	0	6277000	0	0	1	1	1	0	0	0	124.37	0.044554	0.6406	4794300	1	REV__Q9H2T7	REV__Q9H2T7
0	0	0	8631000	0	0	1	1	1	0	0	0	14.747	0.0088496	1.0965	32533000	1	REV__Q9H354	REV__Q9H354
3300000	0	0	0	0	0	1	1	1	0	0	0	44.223	0.040404	0.65515	3300000	1	REV__Q9HB90	REV__Q9HB90
0	0	0	0	0	0	1	1	1	0	0	0	93.273	1	-2	0	1	REV__Q9P1Q0-3;REV__Q9P1Q0-4;REV__Q9P1Q0-2;REV__Q9P1Q0	REV__Q9P1Q0-3;REV__Q9P1Q0-4;REV__Q9P1Q0-2;REV__Q9P1Q0
0	0	0	0	0	3287400	1	1	1	0	0	0	105.51	0.046948	0.61165	68084000	1	REV__Q9P2S6	REV__Q9P2S6
0	0	0	0	0	0	1	1	1	0	0	0	83.142	1	-2	0	1	REV__Q9UPP2-2;REV__Q9UPP2	REV__Q9UPP2-2;REV__Q9UPP2

## Sheet: Supplementary Table S6
Table S6: The p-value and log2 difference of proteins immunoprecipitating with DNAJC11ΔDUF-FLAG in HEK293 cells after statistical analysis with Perseus software in difference descending order for each cluster.
Protein IDs	Protein names	Gene names	Student's T-test p-value	Student's T-test Difference
Q9NVH1-3;Q9NVH1-2;Q9NVH1	DnaJ homolog subfamily C member 11	DNAJC11	0.000330012	3.94263
P05783;CON__H-INV:HIT000015463	Keratin, type I cytoskeletal 18	KRT18	0.494546	3.05981
P07355;A6NMY6;P07355-2	Annexin A2;Putative annexin A2-like protein	ANXA2;ANXA2P2	0.532716	3.00293
A6NCN2	Putative keratin-87 protein	KRT87P	0.382258	2.81801
P48741;P17066	Putative heat shock 70 kDa protein 7;Heat shock 70 kDa protein 6	HSPA1A	0.208805	2.65453
P60866;P60866-2	40S ribosomal protein S20	RPS20	0.14601	2.46152
Q71DI3	Histone H3.2	HIST2H3A	0.585796	2.19656
Q02413;Q02413-2	Desmoglein-1	DSG1	0.295788	2.00789
P11142;P11142-2;P54652;P34931;P11021	Heat shock cognate 71 kDa protein;Heat shock-related 70 kDa protein 2;Heat shock 70 kDa protein 1-like;78 kDa glucose-regulated protein	HSPA8;HSPA2;HSPA1L;HSPA5	0.0188895	1.90832
P07437;Q13509-2;Q9BVA1;Q13885;P68371;Q13509	Tubulin beta chain;Tubulin beta-3 chain;Tubulin beta-2B chain;Tubulin beta-2A chain;Tubulin beta-4B chain	TUBB5;TUBB3;TUBB2B;TUBB2A;TUBB4B	0.0837295	1.73251
Q99880;Q99879;Q99877;Q93079;Q5QNW6;P62807;P58876;P57053;O60814;Q5QNW6-2;Q8N257;Q16778;P33778;P23527;P06899;Q96A08	Histone H2B type 1-L;Histone H2B type 1-M;Histone H2B type 1-N;Histone H2B type 1-H;Histone H2B type 2-F;Histone H2B type 1-C/E/F/G/I;Histone H2B type 1-D;Histone H2B type F-S;Histone H2B type 1-K;Histone H2B type 3-B;Histone H2B type 2-E;Histone H2B type 1-B;Histone H2B type 1-O;Histone H2B type 1-J;Histone H2B type 1-A	HIST1H2BL;HIST1H2BM;HIST1H2BN;HIST1H2BH;HIST2H2BF;HIST1H2BC;HIST1H2BD;H2BFS;HIST1H2BK;HIST3H2BB;HIST2H2BE;HIST1H2BB;HIST1H2BO;HIST1H2BJ;HIST1H2BA	0.385321	1.63528
P31151;Q86SG5	Protein S100-A7;Protein S100-A7A	S100A7;S100A7A	0.236141	1.5685
P31944	Caspase-14;Caspase-14 subunit p17, mature form;Caspase-14 subunit p10, mature form;Caspase-14 subunit p20, intermediate form;Caspase-14 subunit p8, intermediate form	CASP14	0.472783	1.47738
Q9BQA1;Q9BQA1-2	Methylosome protein 50	WDR77	0.521537	1.42641
P68104-2;Q5VTE0;P68104;Q05639	Elongation factor 1-alpha 1;Putative elongation factor 1-alpha-like 3;Elongation factor 1-alpha 2	EEF1A1;EEF1A1P5;EEF1A2	0.725889	0.640472
P60709;Q6S8J3;P63267-2;Q9BYX7;Q562R1	Actin, cytoplasmic 1;Actin, cytoplasmic 1, N-terminally processed;POTE ankyrin domain family member E	ACTB;POTEE	0.748599	0.561449
P14923	Junction plakoglobin	JUP	0.799185	0.476623
Q68CZ6-2;Q68CZ6	HAUS augmin-like complex subunit 3	HAUS3	0.895718	0.457581
P05109	Protein S100-A8;Protein S100-A8, N-terminally processed	S100A8	0.843932	0.429637
P05141;P12236;P12235	ADP/ATP translocase 2;ADP/ATP translocase 2, N-terminally processed;ADP/ATP translocase 3;ADP/ATP translocase 3, N-terminally processed;ADP/ATP translocase 1	SLC25A5;SLC25A6;SLC25A4	0.714986	0.345493
P46821;P78559;P78559-2	Microtubule-associated protein 1B;MAP1B heavy chain;MAP1 light chain LC1	MAP1B	0.921902	0.335533
Q9UQ35;Q9UQ35-2	Serine/arginine repetitive matrix protein 2	SRRM2	0.858064	0.310122
P62987;P62979;P0CG47;P0CG48	Ubiquitin-60S ribosomal protein L40;Ubiquitin;60S ribosomal protein L40;Ubiquitin-40S ribosomal protein S27a;Ubiquitin;40S ribosomal protein S27a;Polyubiquitin-B;Ubiquitin;Polyubiquitin-C;Ubiquitin	UBA52;RPS27A;UBB;UBC	0.899156	0.232768
O14744;O14744-5;O14744-2;O14744-3;O14744-4	Protein arginine N-methyltransferase 5;Protein arginine N-methyltransferase 5, N-terminally processed	PRMT5	0.966024	0.19125
P06702	Protein S100-A9	S100A9	0.996116	0.0147519
A5A3E0;P0CG38;P0CG39;A0A0A6YYL3;B2RU33;H3BUK9;A0JP26-3;A0JP26;Q86YR6	POTE ankyrin domain family member F;POTE ankyrin domain family member I;POTE ankyrin domain family member J	POTEF;POTEI;POTEJ	1	0
Q9NXV2	BTB/POZ domain-containing protein KCTD5	KCTD5	0.953929	-0.0606016
A2NJV5;A0A0A0MRZ7;A0A075B6S2;A0A075B6S6;A0A075B6P5;A0A0C4DH68;A0A087WW87;P06310;P01615;P01614		IGKV A18;IGKV2D-26;IGKV2D-29	0.972903	-0.0754582
P52732	Kinesin-like protein KIF11	KIF11	0.965919	-0.219316
P62805	Histone H4	HIST1H4A	0.884569	-0.250794
P62269	40S ribosomal protein S18	RPS18	0.844573	-0.297495
P63261	Actin, cytoplasmic 2;Actin, cytoplasmic 2, N-terminally processed	ACTG1	0.937334	-0.359877
P81605;P81605-2	Dermcidin;Survival-promoting peptide;DCD-1	DCD	0.634581	-0.563618
P68363-2;Q71U36-2;Q9BQE3;Q71U36;P68363;P0DPH7-2;P0DPH8;P0DPH7;Q6PEY2;Q9NY65-2;P68366-2;P68366;Q9NY65	Tubulin alpha-1B chain;Tubulin alpha-1A chain;Tubulin alpha-1C chain;Tubulin alpha-3E chain	TUBA1B;TUBA1A;TUBA1C;TUBA3E	0.695889	-0.591487
P01024	Complement C3;Complement C3 beta chain;C3-beta-c;Complement C3 alpha chain;C3a anaphylatoxin;Acylation stimulating protein;Complement C3b alpha chain;Complement C3c alpha chain fragment 1;Complement C3dg fragment;Complement C3g fragment;Complement C3d fragment;Complement C3f fragment;Complement C3c alpha chain fragment 2	C3	0.854384	-0.612665
P01023;P20742-2;P20742	Alpha-2-macroglobulin	A2M	0.855306	-0.642183
P68431;Q6NXT2;Q16695;P84243	Histone H3.1;Histone H3.3C;Histone H3.1t;Histone H3.3	HIST1H3A;H3F3C;HIST3H3;H3F3A	0.749722	-0.737553
P15924;P15924-3;P15924-2	Desmoplakin	DSP	0.743538	-0.796961
Q16629-3;Q16629-2;Q16629-4;Q16629;P84103-2;P84103	Serine/arginine-rich splicing factor 7;Serine/arginine-rich splicing factor 3	SRSF7;SRSF3	0.134533	-0.7996
P16401	Histone H1.5	HIST1H1B	0.790011	-1.03268
P00738-2;P00738;P00739;P00739-2	Haptoglobin;Haptoglobin alpha chain;Haptoglobin beta chain;Haptoglobin-related protein	HP;HPR	0.696708	-1.08697
P01009;P01009-2;P01009-3	Alpha-1-antitrypsin;Short peptide from AAT	SERPINA1	0.66975	-1.26836
P68133;P68032;P63267;P62736	Actin, alpha skeletal muscle;Actin, alpha cardiac muscle 1;Actin, gamma-enteric smooth muscle;Actin, aortic smooth muscle	ACTA1;ACTC1;ACTG2;ACTA2	0.0940827	-1.31866
Q5T749	Keratinocyte proline-rich protein	KPRP	0.571483	-1.45812
P02647	Apolipoprotein A-I;Proapolipoprotein A-I;Truncated apolipoprotein A-I	APOA1	0.648596	-1.54702
P02787;CON__Q2HJF0;CON__Q29443;CON__Q0IIK2	Serotransferrin	TF	0.665575	-1.75602
Q86VF7-4;Q86VF7-3;Q86VF7;Q86VF7-2	Nebulin-related-anchoring protein	NRAP	0.515901	-1.80641
P16403;P10412;P16402;P22492;Q02539	Histone H1.2;Histone H1.4;Histone H1.3;Histone H1t;Histone H1.1	HIST1H1C;HIST1H1E;HIST1H1D;HIST1H1T;HIST1H1A	0.288618	-2.46341
Q96JB1-2;Q96JB1;Q8TE73	Dynein heavy chain 8, axonemal;Dynein heavy chain 5, axonemal	DNAH8;DNAH5	0.301383	-3.79792

## Sheet: Supplementary Table S7
Table S7: MiST scoring of proteins immunoprecipitating with DNAJC11ΔDUF-FLAG in HEK293 cells is given in score descending order.
Prey	gene	Specificity	Reproducibility	Abundance	MiST score	Ip
Q9NVH1	DNAJC11	1	0.444805	0.000902999	0.822751	DDUF_1,DDUF_2,DDUF_3
P11142	HSPA8	1	0.299659	0.000638018	0.777968	DDUF_1,DDUF_2,DDUF_3
P48741	HSPA1A	1	0.293221	8.8408e-05	0.775978	DDUF_1,DDUF_3
Q71DI3	HIST2H3A	1	9.10239e-11	0.067425	0.685912	DDUF_2
P05783	KRT18	1	9.10239e-11	0.0621163	0.68588	DDUF_2
P07355	ANXA2	1	9.10239e-11	0.0340506	0.685713	DDUF_2
P03288	P03288	1	9.10239e-11	0.031822	0.6857	DDUF_3
Q30KR1	DEFB109P1	1	9.10239e-11	0.0228869	0.685646	DDUF_1
P26447	S100A4	1	9.10239e-11	0.00992011	0.685569	DDUF_1
Q9UJ78	ZMYM5	1	9.10239e-11	0.00826348	0.685559	DDUF_1
P53992	SEC24C	1	9.10239e-11	0.0080228	0.685558	DDUF_1
P28328	PEX2	1	9.10239e-11	0.00598139	0.685546	DDUF_2
Q9Y2G4	ANKRD6	1	9.10239e-11	0.00505888	0.68554	DDUF_2
Q8NEE6	FBXL13	1	9.10239e-11	0.0049388	0.685539	DDUF_1
P0C723	BRRF1	1	9.10239e-11	0.00461131	0.685537	DDUF_2
P0DJD0	RGPD1	1	9.10239e-11	0.00341109	0.68553	DDUF_3
Q5T3J3	LRIF1	1	9.10239e-11	0.0032206	0.685529	DDUF_2
Q5HYK7	SH3D19	1	9.10239e-11	0.0027951	0.685527	DDUF_1
Q9NVR7	TBCCD1	1	9.10239e-11	0.00267199	0.685526	DDUF_2
P03420	F	1	9.10239e-11	0.00250424	0.685525	DDUF_1
Q9P232	CNTN3	1	9.10239e-11	0.00194691	0.685522	DDUF_3
Q96AP4	ZUFSP	1	9.10239e-11	0.00189455	0.685521	DDUF_1
Q14CB8	ARHGAP19	1	9.10239e-11	0.00121294	0.685517	DDUF_3
Q6Q759	SPAG17	1	9.10239e-11	0.000855735	0.685515	DDUF_2
O15381	NVL	1	9.10239e-11	0.000727055	0.685514	DDUF_1
P01859	IGHG2	1	9.10239e-11	0.000611484	0.685514	DDUF_1
A6NCN2	KRT87P	1	9.10239e-11	0.000531421	0.685513	DDUF_1
Q68CR1	SEL1L3	1	9.10239e-11	0.000474969	0.685513	DDUF_1
P54257	HAP1	1	9.10239e-11	0.000428393	0.685513	DDUF_1
Q5T5U3	ARHGAP21	1	9.10239e-11	0.000396085	0.685512	DDUF_1
Q5TCX8	MLK4	1	9.10239e-11	0.000379756	0.685512	DDUF_1
Q77TG7	TMK	1	9.10239e-11	0.000331316	0.685512	DDUF_1
P36542	ATP5C1	1	9.10239e-11	0.000242053	0.685511	DDUF_1
P53041	PPP5C	1	9.10239e-11	0.000236853	0.685511	DDUF_1
Q9BUH8	BEGAIN	1	9.10239e-11	0.000226268	0.685511	DDUF_3
Q12923	PTPN13	1	9.10239e-11	0.000222465	0.685511	DDUF_1
Q9H6R3	ACSS3	1	9.10239e-11	0.000216046	0.685511	DDUF_1
Q6P280	ZNF529	1	9.10239e-11	0.000202795	0.685511	DDUF_3
Q8NF91	SYNE1	1	9.10239e-11	0.000169888	0.685511	DDUF_3
Q8NH72	OR4C6	1	9.10239e-11	0.000147554	0.685511	DDUF_1
A6NI73	LILRA5	1	9.10239e-11	0.00013893	0.685511	DDUF_1
Q6NSJ2	PHLDB3	1	9.10239e-11	0.000135723	0.685511	DDUF_1
Q9BQA1	WDR77	1	9.10239e-11	0.000135431	0.685511	DDUF_3
Q99880	HIST1H2BL	1	9.10239e-11	0.000119556	0.685511	DDUF_1
Q15025	TNIP1	1	9.10239e-11	0.000117313	0.685511	DDUF_1
Q6ZQW0	IDO2	1	9.10239e-11	0.000111161	0.685511	DDUF_1
P31151	S100A7	1	9.10239e-11	0.000109138	0.685511	DDUF_1
Q0A2G6	PB2	1	9.10239e-11	0.000105094	0.685511	DDUF_1
P68971	IX	1	9.10239e-11	0.000104383	0.685511	DDUF_1
P20893	tat	1	9.10239e-11	0.000100456	0.685511	DDUF_1
O75177-2	SS18L1	1	9.10239e-11	9.25802e-05	0.685511	DDUF_3
P62269	RPS18	1	9.10239e-11	9.00257e-05	0.685511	DDUF_1
Q13190	STX5	1	9.10239e-11	8.73424e-05	0.685511	DDUF_1
P27986	PIK3R1	1	9.10239e-11	7.37962e-05	0.68551	DDUF_1
P62753	RPS6	1	9.10239e-11	6.94485e-05	0.68551	DDUF_1
Q03001-3	DST	1	9.10239e-11	6.81204e-05	0.68551	DDUF_1
Q9BZE1	MRPL37	1	9.10239e-11	6.2452e-05	0.68551	DDUF_3
P78410	BTN3A2	1	9.10239e-11	6.14428e-05	0.68551	DDUF_1
Q9BXF6	RAB11FIP5	1	9.10239e-11	6.09434e-05	0.68551	DDUF_1
P62857	RPS28	1	9.10239e-11	5.28324e-05	0.68551	DDUF_3
Q14714-3	SSPN	1	9.10239e-11	5.02586e-05	0.68551	DDUF_1
Q7RTU5	ASCL5	1	9.10239e-11	4.74908e-05	0.68551	DDUF_1
Q8N6K7	SAMD3	1	9.10239e-11	4.38682e-05	0.68551	DDUF_1
Q8NEF3	CCDC112	1	9.10239e-11	3.84512e-05	0.68551	DDUF_3
Q15643	TRIP11	1	9.10239e-11	3.63256e-05	0.68551	DDUF_1
Q14669	TRIP12	1	9.10239e-11	3.52696e-05	0.68551	DDUF_1
Q8JTG9	L	1	9.10239e-11	3.41713e-05	0.68551	DDUF_1
P30405	PPIF	1	9.10239e-11	3.36338e-05	0.68551	DDUF_1
O14830	PPEF2	1	9.10239e-11	3.32068e-05	0.68551	DDUF_1
P23588	EIF4B	1	9.10239e-11	3.24209e-05	0.68551	DDUF_1
Q569H4	PRR16	1	9.10239e-11	3.11723e-05	0.68551	DDUF_1
P12814	ACTN1	1	9.10239e-11	2.94405e-05	0.68551	DDUF_1
Q9UJA3	MCM8	1	9.10239e-11	2.78852e-05	0.68551	DDUF_1
Q96G23	CERS2	1	9.10239e-11	2.61622e-05	0.68551	DDUF_3
Q9H3K6	BOLA2	1	9.10239e-11	2.37841e-05	0.68551	DDUF_3
P05141	SLC25A5	1	9.10239e-11	2.05502e-05	0.68551	DDUF_1
Q8TF76	GSG2	1	9.10239e-11	2.01841e-05	0.68551	DDUF_1
F5HGN8	TRX2	1	9.10239e-11	1.82769e-05	0.68551	DDUF_3
Q9NRD9	DUOX1	1	9.10239e-11	1.80196e-05	0.68551	DDUF_3
Q9UBG0	MRC2	1	9.10239e-11	1.77178e-05	0.68551	DDUF_1
Q6UWF7	NXPE4	1	9.10239e-11	1.73412e-05	0.68551	DDUF_1
Q9NYL9	TMOD3	1	9.10239e-11	1.6203e-05	0.68551	DDUF_1
P62917	RPL8	1	9.10239e-11	1.45424e-05	0.68551	DDUF_3
Q06830	PRDX1	1	9.10239e-11	1.42393e-05	0.68551	DDUF_3
P98073	TMPRSS15	1	9.10239e-11	1.24056e-05	0.68551	DDUF_1
Q4KWH8	PLCH1	1	9.10239e-11	1.04779e-05	0.68551	DDUF_3
P42696	RBM34	1	9.10239e-11	9.96337e-06	0.68551	DDUF_3
Q14694-2	USP10	1	9.10239e-11	9.09685e-06	0.68551	DDUF_1
P20273	CD22	1	9.10239e-11	8.93311e-06	0.68551	DDUF_1
Q9NPP4	NLRC4	1	9.10239e-11	8.69879e-06	0.68551	DDUF_1
Q9Y6A5	TACC3	1	9.10239e-11	8.58988e-06	0.68551	DDUF_1
O94925	GLS	1	9.10239e-11	8.04833e-06	0.68551	DDUF_1
F5HFH0	US15	1	9.10239e-11	6.87396e-06	0.68551	DDUF_1
Q9BZQ2	SHCBP1L	1	9.10239e-11	6.5164e-06	0.68551	DDUF_3
Q9H330	TMEM245	1	9.10239e-11	6.50222e-06	0.68551	DDUF_3
P61978	HNRNPK	1	9.10239e-11	6.39344e-06	0.68551	DDUF_3
Q8N895	ZNF366	1	9.10239e-11	5.21591e-06	0.68551	DDUF_3
O76000	OR2B3	1	9.10239e-11	5.09977e-06	0.68551	DDUF_3
P19474	TRIM21	1	9.10239e-11	4.24585e-06	0.68551	DDUF_3
Q68DE3	KIAA2018	1	9.10239e-11	3.76125e-06	0.68551	DDUF_1
Q68CZ1	RPGRIP1L	1	9.10239e-11	3.49334e-06	0.68551	DDUF_1
Q9BVV6	KIAA0586	1	9.10239e-11	3.23112e-06	0.68551	DDUF_1
O43820	HYAL3	1	9.10239e-11	2.90726e-06	0.68551	DDUF_3
Q8N1B4	VPS52	1	9.10239e-11	2.68134e-06	0.68551	DDUF_3
Q9Y625	GPC6	1	9.10239e-11	2.00858e-06	0.68551	DDUF_3
O43272	PRODH	1	9.10239e-11	1.92343e-06	0.68551	DDUF_3
A6NN14	ZNF729	1	9.10239e-11	1.72155e-06	0.68551	DDUF_3
Q5CZC0	FSIP2	1	9.10239e-11	1.34211e-06	0.68551	DDUF_1
P78527	PRKDC	1	9.10239e-11	1.08255e-06	0.68551	DDUF_1
Q96PE3	INPP4A	1	9.10239e-11	7.01703e-07	0.68551	DDUF_3
Q7Z4S6	KIF21A	1	9.10239e-11	6.02808e-07	0.68551	DDUF_3
A6NKL6	TMEM200C	1	9.10239e-11	5.78974e-07	0.68551	DDUF_3
Q9UPS8	ANKRD26	1	9.10239e-11	4.80705e-07	0.68551	DDUF_3
Q9UPN3	MACF1	1	9.10239e-11	1.81667e-07	0.68551	DDUF_3
Q2WGJ9	FER1L6	1	9.10239e-11	1.55884e-07	0.68551	DDUF_3
P60866	RPS20	0.663322	0.617606	0.00056754	0.645267	DDUF_1,DDUF_3
A2NJV5	IGKV2-29	0.456138	0.970026	0.6729	0.61598	DDUF_1,DDUF_2,DDUF_3
Q9HAY2	MAGEF1	0.852033	9.10239e-11	0.0214062	0.584205	DDUF_3
P53675	CLTCL1	0.795217	9.10239e-11	9.6228e-05	0.54513	DDUF_1
P07437	TUBB5	0.63366	9.10239e-11	3.47659e-05	0.434381	DDUF_3
P62805	HIST1H4A	0.458898	0.350791	0.00191398	0.42282	DDUF_1,DDUF_3
O14744	PRMT5	0.608477	9.10239e-11	0.00100791	0.417123	DDUF_3
P46821	MAP1B	0.585881	9.10239e-11	4.98179e-05	0.401627	DDUF_1
P81605	DCD	0.308058	0.571849	0.00166889	0.38762	DDUF_1,DDUF_3
Q9BQE3	TUBA1B	0.565209	9.10239e-11	7.01415e-05	0.387457	DDUF_3
P52732	KIF11	0.560306	9.10239e-11	0.00153578	0.384105	DDUF_3
Q5VTE0	EEF1A1	0.422434	9.10239e-11	3.56356e-05	0.289583	DDUF_3
P63261	ACTG1	0.397803	9.10239e-11	0.000862286	0.272703	DDUF_1
P31944	CASP14	0.373937	9.10239e-11	3.70293e-05	0.256338	DDUF_1
Q9UQ35	SRRM2	0.365297	9.10239e-11	5.18825e-06	0.250415	DDUF_1
P62987	UBA52	0.315744	9.10239e-11	0.000199421	0.216447	DDUF_1
P16401	HIST1H1B	0.267652	9.10239e-11	0.000840453	0.183483	DDUF_1
Q02413	DSG1	0.261642	9.10239e-11	1.34788e-05	0.179358	DDUF_1
P05109	S100A8	0.243327	9.10239e-11	0.000154976	0.166804	DDUF_1
P14923	JUP	0.205404	9.10239e-11	2.43464e-05	0.140807	DDUF_1
Q68CZ6	HAUS3	0.2038	9.10239e-11	0.000267352	0.139708	DDUF_3
P06702	S100A9	0.19892	9.10239e-11	0.000143355	0.136362	DDUF_1
Q5T749	KPRP	0.16138	9.10239e-11	3.76106e-05	0.110628	DDUF_1
Q9NXV2	KCTD5	0.149076	9.10239e-11	2.4425e-05	0.102194	DDUF_3
P15924	DSP	0.121813	9.10239e-11	5.8507e-06	0.0835039	DDUF_1
P01023	A2M	0.0996997	9.10239e-11	3.95893e-05	0.0683454	DDUF_3
P00738	HP	0.0962622	9.10239e-11	8.16676e-05	0.0659892	DDUF_3
P02787	TF	0.0950564	9.10239e-11	0.000144732	0.065163	DDUF_3
P02647	APOA1	0.0879452	9.10239e-11	0.000190184	0.0602885	DDUF_3
P01009	SERPINA1	0.0722219	9.10239e-11	0.000117329	0.0495096	DDUF_3
P01024	C3	0.0669043	9.10239e-11	1.84759e-05	0.0458637	DDUF_3

## Sheet: Supplementary Table S8
Table S8: LFQ values for proteins that co-immunoprecipitated with DNAJC11-FLAG in cerebrum of Tg701 mice identified by LC-MS/MS analysis after quantification with MaxQuant program in gene name alphabetical order.
LFQ intensity Tg_DNAJC11_1	LFQ intensity Tg_DNAJC11_2	LFQ intensity Tg_DNAJC11_3	LFQ intensity Tg_DNAJC11_4	LFQ intensity WT_1	LFQ intensity WT_2	LFQ intensity WT_3	LFQ intensity WT_4	N: Peptides	N: Razor + unique peptides	N: Unique peptides	N: Sequence coverage [%]	N: Unique + razor sequence coverage [%]	N: Unique sequence coverage [%]	N: Mol. weight [kDa]	N: Q-value	N: Score	N: Intensity	N: MS/MS count	T: Protein IDs	T: Majority protein IDs	T: Protein names	T: Gene names
36108	0	0	0	0	0	0	0	1	1	1	4.1	4.1	4.1	33.637	0.042885	0.47513	36108	0	Q9DAC5	Q9DAC5		1700013H16Rik
0	0	0	0	0	0	11251000	0	1	1	1	8	8	8	19.601	0.038136	0.51721	135570000	2	K9J7E8;F6QVC4	K9J7E8;F6QVC4		1700049E17Rik2;Gm9732
0	0	0	0	0	0	0	8742500	1	1	1	4.9	4.9	4.9	26.422	0	224.23	205980000	42	Q9CPN9	Q9CPN9		2210010C04Rik
0	0	0	0	1763600	0	0	0	1	1	1	3.4	3.4	3.4	54.557	0.047532	0.43901	923640	1	F7D3E1	F7D3E1		2610015P09Rik
0	0	0	0	0	0	27242000	0	7	1	1	10.6	2.2	2.2	58.224	0	151.54	52661000	2	E9Q1Z0	E9Q1Z0		4732456N10Rik
0	0	0	0	0	0	0	34772	1	1	1	3.8	3.8	3.8	45.79	1	-2	172490	1	Q0VG34	Q0VG34		4930480E11Rik
0	0	0	0	0	0	0	8030400	1	1	1	9	9	9	18.923	1	-2	33555000	1	Q811W1	Q811W1	Alanine and arginine-rich domain-containing protein	Aard
0	0	0	0	0	0	3841600	0	1	1	1	0.5	0.5	0.5	292.59	1	-2	7011100	1	E9Q876	E9Q876		Abca12
0	0	0	0	0	0	0	107270	1	1	1	0.9	0.9	0.9	183.83	0.0035211	1.2229	983410	1	F8WGE3;Q8K442	F8WGE3;Q8K442	ATP-binding cassette sub-family A member 8-A	Abca8a
0	0	0	0	0	0	0	10588000	1	1	1	0.8	0.8	0.8	140.99	1	-2	63739000	1	P06795	P06795	Multidrug resistance protein 1B	Abcb1b
0	0	0	0	0	0	118400	0	1	1	1	22	22	22	5.6514	0.036876	0.53806	1908300	1	D3YVG8;D3YZX5;A0A0N4SWA2;D3Z150;S4R2E1;A0A0R4J0B6	D3YVG8;D3YZX5;A0A0N4SWA2;D3Z150;S4R2E1;A0A0R4J0B6		Abcg2
0	0	0	0	0	0	232980000	0	1	1	1	0.8	0.8	0.8	265.25	0.042636	0.473	360180000	1	Q5SWU9;Q5SWU9-2	Q5SWU9;Q5SWU9-2	Acetyl-CoA carboxylase 1;Biotin carboxylase	Acaca
0	0	0	0	0	0	0	72210	1	1	1	7.9	7.9	7.9	12.562	0.047706	0.44038	470090	1	A0A1W2P7X3;Q561M1;Q9D358-2;Q9D358	A0A1W2P7X3;Q561M1;Q9D358-2;Q9D358	Low molecular weight phosphotyrosine protein phosphatase	Acp1
0	1348500	2209300	640910	0	536470	1282300	2742700	9	1	1	27.3	4.2	4.2	42.051	0.0033898	1.1791	16634000	11	P68134;P68033;P63268;P62737;A0A1D5RM20;D3Z2K3;D3YZY0	P68134;P68033;P63268;P62737;A0A1D5RM20;D3Z2K3;D3YZY0	Actin, alpha skeletal muscle;Actin, alpha cardiac muscle 1;Actin, gamma-enteric smooth muscle;Actin, aortic smooth muscle	Acta1;Actc1;Actg2;Acta2
30381000	25343000	23885000	13773000	31513000	19399000	22596000	20516000	16	16	1	65.9	65.9	4.5	41.736	0	91.412	181760000	104	P60710;E9Q1F2;E9Q5F4;G3UZ07;F8WGM8;E9Q2D1;F6WX90;V9GXQ2;A0A0U1RQ96	P60710;E9Q1F2;E9Q5F4;G3UZ07	Actin, cytoplasmic 1;Actin, cytoplasmic 1, N-terminally processed	Actb;Actg1
0	0	0	0	0	0	4787700	0	5	1	1	22.1	4.8	4.8	42.004	0.0033557	1.1673	6093900	1	Q8BFZ3	Q8BFZ3	Beta-actin-like protein 2	Actbl2
0	0	0	0	0	0	358460	0	16	1	1	65.9	4.5	4.5	41.792	0.0032362	1.0825	1121800	3	P63260;G3UYG0;B1ATY1;E9Q606	P63260	Actin, cytoplasmic 2;Actin, cytoplasmic 2, N-terminally processed	Actg1
0	0	0	0	0	0	0	140210000	1	1	1	4.3	4.3	4.3	51.943	0.018519	0.76956	206820000	1	Q8BZI0-2;Q8BZI0	Q8BZI0-2;Q8BZI0	Actin filament-associated protein 1-like 1	Afap1l1
0	0	0	0	45744000	0	0	0	1	1	1	2.5	2.5	2.5	114.97	0.041121	0.45765	37885000	1	A0A1L1SQE2;E9QP54;Q8K3E5-2;Q8K3E5	A0A1L1SQE2;E9QP54;Q8K3E5-2;Q8K3E5	Jouberin	Ahi1
0	0	0	0	0	0	0	0	1	1	1	0.2	0.2	0.2	604.25	1	-2	0	1	E9Q616	E9Q616		Ahnak
2150800	1761900	1291100	944090	5171300	2908400	1076200	2533500	8	7	7	15	13.5	13.5	68.692	0	12.418	14254000	17	P07724	P07724	Serum albumin	Alb
0	0	0	0	0	0	0	143750	1	1	1	7.8	7.8	7.8	19.573	0.014451	0.89309	803930	1	D3Z510;A0A0U1RPN8;D3YV98;A0A0U1RPT5;D3YWI1;A6ZI47;A6ZI44;P05064	D3Z510;A0A0U1RPN8;D3YV98;A0A0U1RPT5;D3YWI1;A6ZI47;A6ZI44;P05064	Fructose-bisphosphate aldolase;Fructose-bisphosphate aldolase A	Aldoa;Aldoart2
0	0	253560	0	0	0	0	0	1	1	1	0.8	0.8	0.8	182.56	0.041916	0.48115	472430	1	Q920R0	Q920R0	Alsin	Als2
0	0	622500	358650	0	0	216540	270460	2	2	2	15.3	15.3	15.3	26.94	0.0035587	1.233	1971700	3	O08583;Q9JJW6-2;O08583-2	O08583;Q9JJW6-2;O08583-2	THO complex subunit 4	Alyref
0	0	0	0	0	0	0	0	1	1	1	1.3	1.3	1.3	83.714	1	-2	0	1	A2AH22-4;A2AH22-3;A2AH22-5;A2AH22-7;A2AH22-2;A2AH22-6;A2AH22	A2AH22-4;A2AH22-3;A2AH22-5;A2AH22-7;A2AH22-2;A2AH22-6;A2AH22	Activating molecule in BECN1-regulated autophagy protein 1	Ambra1
0	0	0	0	115990	0	0	0	1	1	1	2.2	2.2	2.2	75.339	0.022277	0.6904	98907	1	A0A0G2JEG8;Q7TQF7	A0A0G2JEG8;Q7TQF7	Amphiphysin	Amph
753960	1452100	1823100	612100	572220	0	1911400	1361000	10	10	10	11.1	11.1	11.1	128.65	0	26.346	10809000	27	Q810B6;Q810B6-2	Q810B6;Q810B6-2	Rabankyrin-5	Ankfy1
0	0	0	0	99923	0	0	0	1	1	1	0.4	0.4	0.4	296.18	0.048253	0.39626	185580	1	E9Q4F7;E9Q4F8	E9Q4F7;E9Q4F8		Ankrd11
0	0	0	0	0	3775600	0	0	1	1	1	1.4	1.4	1.4	71.198	0.014409	0.88663	2638500	1	A2ANY8;Q69ZU8-2;Q69ZU8	A2ANY8;Q69ZU8-2;Q69ZU8	Ankyrin repeat domain-containing protein 6	Ankrd6
0	0	0	0	0	0	0	195890	1	1	1	3.8	3.8	3.8	38.734	0.02968	0.59879	237200	1	P10107	P10107	Annexin A1	Anxa1
0	0	426880	855410	0	0	362760	506410	5	5	5	34.1	34.1	34.1	19.596	0	3.8157	2985400	8	B0V2N8;B0V2N7;P07356;B0V2N5	B0V2N8;B0V2N7;P07356	Annexin;Annexin A2	Anxa2
0	0	0	0	0	0	0	126910	1	1	1	1.5	1.5	1.5	91.721	0.0034014	1.1793	46509000	5	Q8CBB7;P22892	Q8CBB7;P22892	AP-1 complex subunit gamma-1	Ap1g1
3201500	1888800	2056900	1278200	1961600	2367200	3332000	3010700	16	16	9	20	20	10.7	105.48	0	22.791	20628000	35	P17426-2;P17426;A0A140LIG7;A0A140LHG0	P17426-2;P17426	AP-2 complex subunit alpha-1	Ap2a1
1018100	641650	698000	414850	593240	1203600	905610	622130	16	9	9	21.5	12	12	104.02	0	9.6763	6265400	14	P17427	P17427	AP-2 complex subunit alpha-2	Ap2a2
4195600	2128900	2433600	1570200	1446200	3350800	3960200	3605200	16	16	16	22.6	22.6	22.6	104.58	0	18.171	24736000	34	Q9DBG3;Q9DBG3-2;H3BKM0;H3BIY9;Q5SVG5;Q5SVG4;O35643;H3BJ06	Q9DBG3;Q9DBG3-2;H3BKM0;H3BIY9	AP-2 complex subunit beta;AP complex subunit beta	Ap2b1
3477500	2281000	2396700	1426400	2189000	3660900	3236500	3534700	11	11	11	31.5	31.5	31.5	49.654	0	9.8087	24255000	26	P84091;Q3TWV4;A0A338P6T4	P84091;Q3TWV4	AP-2 complex subunit mu	Ap2m1
0	0	0	0	0	0	0	573140	3	3	3	23.9	23.9	23.9	17.018	0	2.7392	2825500	3	P62743;A0A0U1RPS0;A0A0U1RQ06	P62743;A0A0U1RPS0	AP-2 complex subunit sigma	Ap2s1
2385700	3349700	3061800	1662500	2093800	4656100	3778400	4046200	19	19	19	22.9	22.9	22.9	119.19	0	17.33	25991000	37	Q9JME5;A0A140LHP9;Q9Z1T1	Q9JME5	AP-3 complex subunit beta-2	Ap3b2
0	789310	720690	609710	0	993470	1290500	1500500	10	10	10	9.8	9.8	9.8	135.08	0	5.4047	6990500	17	O54774	O54774	AP-3 complex subunit delta-1	Ap3d1
0	0	753820	548850	0	789860	1136900	642110	4	4	4	30.4	30.4	30.4	20.697	0	3.2613	4328100	8	P84078;P61205;P84084;Q8BSL7;P61750	P84078;P61205;P84084;Q8BSL7	ADP-ribosylation factor 1;ADP-ribosylation factor 3;ADP-ribosylation factor 5;ADP-ribosylation factor 2	Arf1;Arf3;Arf5;Arf2
0	0	0	0	0	0	201970	0	1	1	1	0.6	0.6	0.6	240.09	0.035242	0.55228	742080	1	Q3UGY8	Q3UGY8	Brefeldin A-inhibited guanine nucleotide-exchange protein 3	Arfgef3
0	0	0	0	0	0	0	114230	1	1	1	1	1	1	108.59	0.047619	0.38909	488630	1	H3BJU7;H3BJX8;H3BJ45;H3BJ40;H3BKH9;Q60875-5;Q60875-4;Q60875	H3BJU7;H3BJX8;H3BJ45;H3BJ40;H3BKH9;Q60875-5;Q60875-4;Q60875	Rho guanine nucleotide exchange factor 2	Arhgef2
1183800	648690	383990	265150	722880	0	450470	0	4	4	4	28.5	28.5	28.5	22.605	0	12.56	3238000	8	D3YWC2;D3Z6F1;Q9JM93	D3YWC2;D3Z6F1;Q9JM93	ADP-ribosylation factor-like protein 6-interacting protein 4	Arl6ip4
0	0	0	0	0	0	0	39405	1	1	1	3.8	3.8	3.8	67.895	0.023364	0.61574	9215200	1	Q3UZB0	Q3UZB0	Armadillo repeat-containing X-linked protein 5	Armcx5
0	0	0	0	0	0	0	53924	1	1	1	9.2	9.2	9.2	16.282	0.038055	0.51427	381100	2	A0A0G2JFK7;D3Z2F7;D3Z2F8;H7BWZ3;Q9JM76	A0A0G2JFK7;D3Z2F7;D3Z2F8;H7BWZ3;Q9JM76	Actin-related protein 2/3 complex subunit 3	Arpc3
0	0	0	0	0	0	116510	0	1	1	1	1.8	1.8	1.8	80.975	0.022005	0.68124	967400	4	Q91WR3-2;Q91WR3;Q91WR3-3	Q91WR3-2;Q91WR3;Q91WR3-3	Activating signal cointegrator 1 complex subunit 2	Ascc2
2079900	0	0	0	2762500	0	0	0	20	10	10	26.3	13	13	112.98	0	8.1232	3742300	11	Q8VDN2	Q8VDN2	Sodium/potassium-transporting ATPase subunit alpha-1	Atp1a1
429800	0	0	0	886160	0	0	0	14	3	3	19.4	3.9	3.9	103.58	0	2.5229	1442800	4	D3YYN7;Q6PIE5	D3YYN7;Q6PIE5	Sodium/potassium-transporting ATPase subunit alpha-2	Atp1a2
14229000	8782000	6821300	4008000	18158000	10610000	6771700	7116400	26	26	15	33.6	33.6	19.3	112.99	0	42.009	70878000	86	A0A0G2JGX4;Q8VCE0;Q6PIC6;Q9WV27;Q91WH7;E9QNX7;Q64436;Q9Z1W8	A0A0G2JGX4;Q8VCE0;Q6PIC6	Sodium/potassium-transporting ATPase subunit alpha-3	Atp1a3
0	1830200	1395900	905710	0	2033900	1397100	1350700	7	7	7	28	28	28	35.194	0	41.377	11305000	15	P14094;A0A0A6YX05	P14094;A0A0A6YX05	Sodium/potassium-transporting ATPase subunit beta-1	Atp1b1
543080	374780	377160	302450	586520	527850	351340	468010	5	5	2	5.9	5.9	2.3	134.75	0	10.946	3091000	9	G5E829;Q8C048;A2ALL9;Q0VF55;Q6Q477-2;F7AAP4;E9Q828;Q6Q477;A0A1W2P867	G5E829;Q8C048;A2ALL9;Q0VF55;Q6Q477-2;F7AAP4;E9Q828;Q6Q477	Plasma membrane calcium-transporting ATPase 1;Calcium-transporting ATPase	Atp2b1;Atp2b3;Atp2b4
0	0	0	0	263820	0	0	0	4	1	1	5.2	1.4	1.4	127.3	0.048027	0.41052	188010	1	S4R1C4;Q3UHH0;F8WHB1;Q9R0K7	S4R1C4;Q3UHH0;F8WHB1;Q9R0K7	Calcium-transporting ATPase;Plasma membrane calcium-transporting ATPase 2	Atp2b2
2037600	2549100	1836200	1409100	2526300	1883200	1998300	1664600	10	10	10	24.4	24.4	24.4	59.752	0	7.1834	13842000	28	Q03265;D3Z6F5;D6RJ16	Q03265;D3Z6F5	ATP synthase subunit alpha, mitochondrial;ATP synthase subunit alpha	Atp5a1
0	0	185830	160860	0	0	0	138630	4	4	4	12.3	12.3	12.3	56.3	0	2.1895	1094500	4	P56480	P56480	ATP synthase subunit beta, mitochondrial	Atp5b
0	0	217040	0	0	0	199600	190890	2	2	2	8.8	8.8	8.8	30.255	0.0033445	1.1402	1122000	3	Q8C2Q8;Q91VR2;A2AKV1;A2AKV2;A2AKV3;A2AKU9	Q8C2Q8;Q91VR2;A2AKV1;A2AKV2;A2AKV3;A2AKU9	ATP synthase subunit gamma;ATP synthase subunit gamma, mitochondrial	Atp5c1
0	0	0	0	0	0	0	8362300	1	1	1	8.4	8.4	8.4	11.1	0.014535	0.90226	21981000	2	A0A087WQS5;P56383	A0A087WQS5;P56383	ATP synthase F(0) complex subunit C2, mitochondrial	Atp5g2
0	0	0	0	0	0	0	63191	1	1	1	6.5	6.5	6.5	15.882	0.048986	0.40316	507560	1	B1ASE2;Q9DCX2	B1ASE2;Q9DCX2	ATP synthase subunit d, mitochondrial	Atp5h
0	0	0	0	0	0	0	192910	1	1	1	16.9	16.9	16.9	8.2355	0.018568	0.77041	1497200	1	Q06185	Q06185	ATP synthase subunit e, mitochondrial	Atp5i
0	549610	537040	0	0	0	354530	0	2	2	2	26.9	26.9	26.9	12.496	0.0036765	1.2985	2630600	3	P97450;E9QAD6	P97450;E9QAD6	ATP synthase-coupling factor 6, mitochondrial	Atp5j
0	0	0	0	0	0	0	183160	1	1	1	15.8	15.8	15.8	9.0054	0.014493	0.89919	917680	3	F8WHP8;P56135	F8WHP8;P56135	ATP synthase subunit f, mitochondrial	Atp5j2
808390	1392100	989430	1112000	0	1141600	1149300	1039900	6	6	6	40.4	40.4	40.4	23.363	0	6.5646	8723400	14	Q9DB20;A0A338P7G3;A0A338P776;F7D3P8;F6XVM5	Q9DB20;A0A338P7G3	ATP synthase subunit O, mitochondrial	Atp5o
768410	423910	209550	251800	664220	623260	416830	492090	5	5	5	7.5	7.5	7.5	96.426	0	6.5743	3427600	12	K3W4T3;Q9Z1G4-3;Q9Z1G4-2;Q9Z1G4	K3W4T3;Q9Z1G4-3;Q9Z1G4-2;Q9Z1G4	V-type proton ATPase subunit a;V-type proton ATPase 116 kDa subunit a isoform 1	Atp6v0a1
33838	0	0	0	0	0	0	0	1	1	1	2.4	2.4	2.4	68.325	0.048043	0.42755	33838	1	P50516	P50516	V-type proton ATPase catalytic subunit A	Atp6v1a
0	0	0	0	0	0	0	249220	1	1	1	4	4	4	53.706	0.023529	0.62906	872970	1	P28658	P28658	Ataxin-10	Atxn10
0	0	0	0	0	0	0	253480	1	1	1	0.7	0.7	0.7	282.54	0.0031949	1.0487	4145500	2	E9Q7G4;Q3UHR0	E9Q7G4;Q3UHR0	BAH and coiled-coil domain-containing protein 1	Bahcc1
0	0	0	0	0	661790	0	0	1	1	1	3	3	3	59.236	1	-2	503240	1	Q8BKX1	Q8BKX1	Brain-specific angiogenesis inhibitor 1-associated protein 2	Baiap2
1911900	853920	1715500	3775500	1648000	709820	782760	523660	7	7	7	55.8	55.8	55.8	22.086	0	8.6838	10042000	13	Q91XV3	Q91XV3	Brain acid soluble protein 1	Basp1
0	0	0	0	0	0	0	907150	1	1	1	4.4	4.4	4.4	35.04	0.049153	0.40371	3366300	1	A2AUY3;A2AUY4	A2AUY3;A2AUY4		Baz2b
0	341060	346640	331940	0	0	0	363620	3	3	3	12.1	12.1	12.1	40.426	0	2.1365	2457800	8	F7BNZ5;Q80YN3;A2AVX1;E9Q8Q5	F7BNZ5;Q80YN3;A2AVX1;E9Q8Q5	Breast carcinoma-amplified sequence 1 homolog	Bcas1
0	0	0	0	0	0	62957	0	1	1	1	4.5	4.5	4.5	29.146	0.048333	0.39712	284120	1	D3Z2Y8;Q80XN0	D3Z2Y8;Q80XN0	D-beta-hydroxybutyrate dehydrogenase, mitochondrial	Bdh1
0	0	0	0	158020	0	0	0	1	1	1	16.7	16.7	16.7	6.3291	0.0092308	0.98618	191150	2	Q8BGS2-2;Q8BGS2	Q8BGS2-2;Q8BGS2	BolA-like protein 2	Bola2
0	0	0	0	0	313400	0	0	1	1	1	1.1	1.1	1.1	69.147	1	-2	219010	1	Q8C726	Q8C726	BTB/POZ domain-containing protein 9	Btbd9
0	0	0	0	0	0	0	398970	1	1	1	4.7	4.7	4.7	26.717	0.0036496	1.2894	2271200	4	P14106	P14106	Complement C1q subcomponent subunit B	C1qb
0	0	0	101810	0	0	0	0	1	1	1	7.2	7.2	7.2	31.025	0.0092025	0.98276	258260	1	Q8R5L1	Q8R5L1		C1qbp
411410	0	0	0	331590	0	0	0	2	2	2	1.6	1.6	1.6	192.91	0	2.9899	1317300	3	P01029;CON__ENSEMBL:ENSBTAP00000007350;CON__P01030	P01029;CON__ENSEMBL:ENSBTAP00000007350;CON__P01030	Complement C4-B;Complement C4 beta chain;Complement C4 alpha chain;C4a anaphylatoxin;Complement C4 gamma chain	C4b
0	0	0	29781	0	0	0	0	1	1	1	3.6	3.6	3.6	42.723	1	-2	23841	0	Q8R464	Q8R464	Cell adhesion molecule 4	Cadm4
0	0	0	0	0	0	0	46575	1	1	1	6.2	6.2	6.2	24.648	1	-2	81088	0	F6ZAW1;F6T2Z7;E9QA15	F6ZAW1;F6T2Z7;E9QA15		Cald1
931270	0	0	0	1490800	0	997240	0	3	3	3	31.5	31.5	31.5	16.837	0	3.9317	2324400	5	P0DP28;P0DP27;P0DP26;Q3UKW2;G3UX57;Q9D6P8	P0DP28;P0DP27;P0DP26;Q3UKW2		Calm1
9016800	6993100	5265200	3303900	6241700	8166600	6385100	7492000	10	10	7	27.2	27.2	18.4	54.114	0	71.25	54548000	53	P11798;F8WIS9;F8WHB5;P11798-2;Q8CCM0;E9Q1V9;E9Q1W0;E9Q1T1;A0A0G2JGS4;Q6PHZ2-2;Q6PHZ2-4;Q6PHZ2;Q6PHZ2-5;D3Z7K9;F6WHR9	P11798;F8WIS9;F8WHB5	Calcium/calmodulin-dependent protein kinase type II subunit alpha	Camk2a
425590	756340	533490	428320	506720	746810	590820	749950	9	6	5	23.6	15.9	13.5	60.46	0	5.1718	5209800	11	P28652;Q5SVI9;Q5SVI2;Q5SVJ0;Q5SVI3;Q5SVI0;Q5SVI1;Q68EG2;Q5SVJ1;Q923T9-2;Q923T9;A0A2I3BQP6;Q923T9-3;A0A286YCW8;A0A286YCB8;A0A286YCH4;A0A286YDK9	P28652;Q5SVI9;Q5SVI2;Q5SVJ0;Q5SVI3;Q5SVI0;Q5SVI1;Q68EG2;Q5SVJ1	Calcium/calmodulin-dependent protein kinase type II subunit beta	Camk2b
663020	335490	371100	243460	322430	0	365480	647260	5	5	5	14.3	14.3	14.3	51.674	0	5.5756	3187900	9	A0A0A6YW88;Q3UHL1	A0A0A6YW88;Q3UHL1	CaM kinase-like vesicle-associated protein	Camkv
0	0	0	0	0	0	168830	0	1	1	1	1.7	1.7	1.7	91.461	0.0038911	1.4789	642940	3	Q80VC9-9;Q80VC9;Q80VC9-5;Q80VC9-11;Q80VC9-4;Q80VC9-12;Q80VC9-3;Q80VC9-10;Q80VC9-2;Q80VC9-13;Q80VC9-17;Q80VC9-8;Q80VC9-16;Q80VC9-7;Q80VC9-15;Q80VC9-6;Q80VC9-14	Q80VC9-9;Q80VC9;Q80VC9-5;Q80VC9-11;Q80VC9-4;Q80VC9-12;Q80VC9-3;Q80VC9-10;Q80VC9-2;Q80VC9-13;Q80VC9-17;Q80VC9-8;Q80VC9-16;Q80VC9-7;Q80VC9-15;Q80VC9-6;Q80VC9-14	Calmodulin-regulated spectrin-associated protein 3	Camsap3
0	0	0	0	0	0	0	1341400	1	1	1	1.7	1.7	1.7	65.324	0.03719	0.49939	4536900	1	A2A891-4;A2A891-3;A2A891-5;A2A891-2;A2A891	A2A891-4;A2A891-3;A2A891-5;A2A891-2;A2A891	Calmodulin-binding transcription activator 1	Camta1
53768	0	0	0	0	0	0	0	1	1	1	1.5	1.5	1.5	67.277	0.04175	0.47751	53768	1	P35564	P35564	Calnexin	Canx
0	369260	314770	325400	0	0	258850	0	4	4	4	11.8	11.8	11.8	51.564	0	3.5497	1824000	7	P40124;B1ARS0	P40124	Adenylyl cyclase-associated protein 1	Cap1
0	368300	441630	259900	0	0	293920	293160	4	4	4	12.9	12.9	12.9	39.877	0	2.3521	2208400	4	D3YTR7;Q9CYT6;A0A286YCS6	D3YTR7;Q9CYT6;A0A286YCS6	Adenylyl cyclase-associated protein;Adenylyl cyclase-associated protein 2	Cap2
92165	0	0	0	0	0	0	0	1	1	1	1.7	1.7	1.7	78.168	0.048658	0.40103	92165	1	Q60865	Q60865	Caprin-1	Caprin1
0	450350	559840	0	0	0	455050	0	2	2	2	9.1	9.1	9.1	32.967	0.0034364	1.1946	3052800	4	P47754;A0A0G2JE27;A0A0N4SVM0;D6RCW7;Q5RKN9;P47753	P47754;A0A0G2JE27;A0A0N4SVM0;D6RCW7;Q5RKN9;P47753	F-actin-capping protein subunit alpha-2;F-actin-capping protein subunit alpha-1	Capza2;Capza1
0	411770	358000	0	0	0	359820	365950	3	3	3	12.3	12.3	12.3	29.295	0	1.8727	2339100	4	A2AMW0;P47757-2;P47757;P47757-4;A0A0A0MQI9;F6YHZ8;F7CAZ6	A2AMW0;P47757-2;P47757;P47757-4;A0A0A0MQI9;F6YHZ8;F7CAZ6	F-actin-capping protein subunit beta	Capzb
43321	0	0	0	0	0	0	0	1	1	1	4.1	4.1	4.1	39.617	0.031674	0.5897	43321	1	Q6P9K8-4;Q6P9K8-2;Q6P9K8-3;Q6P9K8	Q6P9K8-4;Q6P9K8-2;Q6P9K8-3;Q6P9K8	Caskin-1	Caskin1
0	0	0	0	0	0	0	0	1	1	1	0.6	0.6	0.6	209.13	0.020305	0.71726	0	1	Q3V0B4	Q3V0B4	Coiled-coil domain-containing protein 108	Ccdc108
0	0	0	0	0	0	0	0	1	1	1	2.6	2.6	2.6	36.178	0.047882	0.44112	0	1	A2AJB1-2;A2AJB1	A2AJB1-2;A2AJB1	Coiled-coil domain-containing protein 183	Ccdc183
0	0	0	0	1679400	0	0	0	1	1	1	4.4	4.4	4.4	55.057	0.014124	0.84662	326140	1	A0A0N4SV00;P80313	A0A0N4SV00;P80313	T-complex protein 1 subunit eta	Cct7
0	36143	0	0	0	0	0	0	1	1	1	8.2	8.2	8.2	16.02	0.049069	0.40323	37899	0	A2AIJ2;A2AIJ1;P40237	A2AIJ2;A2AIJ1;P40237	Tetraspanin;CD82 antigen	Cd82
0	0	0	0	0	0	0	0	1	1	1	2.5	2.5	2.5	50.603	0.030162	0.60606	0	1	A0A2R8VK38;Q569L8	A0A2R8VK38;Q569L8	Centromere protein J	Cenpj
0	0	0	0	0	0	0	703300	2	2	2	10.7	10.7	10.7	26.48	0.003268	1.1134	2436800	2	I7HPW3;A2ABQ5;S4R1I4;J3JS86;Q5PR68	I7HPW3;A2ABQ5;S4R1I4;J3JS86;Q5PR68	Centrosomal protein of 112 kDa	Cep112
0	0	0	0	0	0	0	6885100	1	1	1	1.3	1.3	1.3	105.9	0.0033333	1.1396	17658000	3	Q7TSG1-2;Q7TSG1	Q7TSG1-2;Q7TSG1	Centrosomal protein of 120 kDa	Cep120
0	0	0	0	0	0	0	165550	1	1	1	2.5	2.5	2.5	62.758	0.029885	0.60156	749920	1	F6Z9B9	F6Z9B9	Carboxylic ester hydrolase	Ces2h
521920	991410	1334700	997660	1189500	0	1157900	749440	4	4	3	23.3	23.3	18.5	24.576	0	6.5743	7671100	16	F8WGL3;P18760	F8WGL3;P18760	Cofilin-1	Cfl1
0	0	0	0	0	0	0	105650	2	1	1	18.7	12	12	18.709	0.014164	0.85547	607900	1	P45591	P45591	Cofilin-2	Cfl2
0	0	345790	109090	0	0	0	0	2	2	2	12.3	12.3	12.3	26.334	0.0039062	1.4974	808930	2	Q9CRB9;S4R238;F6QFL0;Q9D9P1;D3Z0L4	Q9CRB9;S4R238;F6QFL0;Q9D9P1;D3Z0L4	MICOS complex subunit Mic19	Chchd3
0	294030	380680	241960	0	0	0	0	3	3	3	15.5	15.5	15.5	26.388	0	2.069	1317100	4	E9Q4M4;Q91VN4	E9Q4M4;Q91VN4	MICOS complex subunit Mic25	Chchd6
0	0	0	0	0	0	0	3080200	1	1	1	0.5	0.5	0.5	213.92	0.0031847	1.0449	5280700	1	F7C528;E9Q614;B1AR17	F7C528;E9Q614;B1AR17		Chd3
0	0	0	0	767680	0	0	0	1	1	1	2.3	2.3	2.3	57.925	0.018229	0.75115	994880	1	Q810L3-4;Q810L3-3;Q810L3-2;Q810L3	Q810L3-4;Q810L3-3;Q810L3-2;Q810L3	E3 ubiquitin-protein ligase CHFR	Chfr
0	0	0	0	0	84443	0	0	1	1	1	6.6	6.6	6.6	22.566	1	-2	79655	0	Q9D869	Q9D869	Calcineurin B homologous protein 2	Chp2
0	214580	647870	297850	0	0	422960	192590	3	3	3	20.9	20.9	20.9	18.607	0	3.3713	2425100	6	P60824;D3YU80;K4DI65	P60824;D3YU80;K4DI65	Cold-inducible RNA-binding protein	Cirbp
0	0	0	0	159640	0	0	0	1	1	1	12	12	12	12.097	0.014286	0.87451	97014	1	Q91WS0	Q91WS0	CDGSH iron-sulfur domain-containing protein 1	Cisd1
705110	1305800	1227600	912500	0	1591300	1827300	1650500	11	11	11	10.3	10.3	10.3	140.74	0	8.3328	11048000	19	Q8BRT1;Q08EB5;E9Q8N5;Q08EB6;F7DCH5;J3QP81;E9QKH0;A0A087WRE8;E9QNY9;A0A087WP42;A0A087WRK0;A0A087WNW8;A0A087WQ95;A0A087WQF1;A0A087WS18;Q80TV8;E9Q6L0;A0A0A6YXZ1;A0A1L1ST22;Q8BSE7;A0A087WQ31;Q8BRT1-6;Q8BRT1-5;Q80TV8-2;A0A0N4SUT7;A0A1L1SRY3	Q8BRT1;Q08EB5;E9Q8N5;Q08EB6;F7DCH5	CLIP-associating protein 2	Clasp2
0	0	0	0	0	0	0	0	1	1	1	2.2	2.2	2.2	61.254	0.022333	0.69134	0	1	A0A0R4IZZ5;P70194	A0A0R4IZZ5;P70194	C-type lectin domain family 4 member F	Clec4f
0	0	293250	0	0	0	0	0	2	2	2	1.7	1.7	1.7	148	0.0034843	1.2197	1168500	2	D3Z3M7;D3Z2Z1;F8WIA1;Q922J3-2;Q922J3;Q8C0S5;F6RCU2;Q9Z0H8-2;Q9Z0H8	D3Z3M7;D3Z2Z1;F8WIA1;Q922J3-2;Q922J3;Q8C0S5;F6RCU2;Q9Z0H8-2;Q9Z0H8	CAP-Gly domain-containing linker protein 1;CAP-Gly domain-containing linker protein 2	Clip1;Clip2
0	0	0	0	0	0	0	1626100	1	1	1	2.6	2.6	2.6	59.586	1	-2	3812800	0	B9EHT4	B9EHT4	CAP-Gly domain-containing linker protein 3	Clip3
0	0	0	0	207650	0	0	0	2	2	2	10.8	10.8	10.8	26.522	0.003876	1.4503	1281500	2	Q923F1;Q61189	Q923F1;Q61189	Methylosome subunit pICln	Clns1a
0	0	0	0	141080	0	0	0	1	1	1	4.2	4.2	4.2	23.478	0.041431	0.45852	107410	1	B1AWE0;Q6PFA2;B1AWE1;B1AWD8;B1AWD9;O08585	B1AWE0;Q6PFA2;B1AWE1;B1AWD8;B1AWD9;O08585	Clathrin light chain A	Clta
2816700	1858700	1255100	791770	1542000	2275400	1666200	2169800	22	22	22	20.3	20.3	20.3	191.55	0	17.81	14557000	38	Q68FD5;Q5SXR6;F6Z1R4	Q68FD5;Q5SXR6	Clathrin heavy chain 1;Clathrin heavy chain	Cltc
4612300	4749200	3578900	2045900	4086200	5774000	4131400	5313200	10	10	10	32	32	32	44.654	0	45.084	35503000	39	P16330-2;P16330	P16330-2;P16330	2,3-cyclic-nucleotide 3-phosphodiesterase	Cnp
0	0	0	0	0	0	0	1492900	1	1	1	1.3	1.3	1.3	148.25	1	-2	3173500	1	E9QNF7;Q9CPW0	E9QNF7;Q9CPW0	Contactin-associated protein-like 2	Cntnap2
0	0	0	0	0	0	46253	0	1	1	1	0.6	0.6	0.6	204.92	0.03532	0.5545	1094900	1	E9Q9E7;R4GML3;A2AL36	E9Q9E7;R4GML3;A2AL36	Centriolin	Cntrl
6493300	2642600	1959600	5242800	6535500	2783200	2916500	2650100	5	5	5	5	5	5	138.03	0	6.5147	30090000	32	P11087;P11087-2	P11087;P11087-2	Collagen alpha-1(I) chain	Col1a1
413430	0	0	0	0	0	0	0	1	1	1	0.7	0.7	0.7	129.56	0.035011	0.54625	413430	1	Q01149	Q01149	Collagen alpha-2(I) chain	Col1a2
0	0	0	0	0	4123500	0	0	1	1	1	1.3	1.3	1.3	131.86	0.036717	0.52901	11429000	1	P28481-2;P28481-7;P28481-6;P28481-5;P28481-4;P28481-1;P28481	P28481-2;P28481-7;P28481-6;P28481-5;P28481-4;P28481-1;P28481	Collagen alpha-1(II) chain;Collagen alpha-1(II) chain;Chondrocalcin	Col2a1
0	0	0	0	0	0	0	362400	1	1	1	0.6	0.6	0.6	185.73	0.020408	0.72757	11579000	2	D3YWD1;J3QQ16;A0A087WS16;E9PWQ3	D3YWD1;J3QQ16;A0A087WS16;E9PWQ3		Col6a3
0	0	0	0	0	0	0	114080	1	1	1	0.6	0.6	0.6	246.42	0.016575	0.82273	2823100	2	E9Q6A6;Q8C6K9-2;Q8C6K9	E9Q6A6;Q8C6K9-2;Q8C6K9	Collagen alpha-6(VI) chain	Col6a6
0	0	0	0	0	0	0	339700	1	1	1	2.3	2.3	2.3	71.06	0.049236	0.40489	1824300	0	Q8K297	Q8K297	Procollagen galactosyltransferase 1	Colgalt1
0	0	0	0	0	0	0	0	1	1	1	2.8	2.8	2.8	55.051	0.020566	0.73808	0	1	D6RCH2;Q6NVG7	D6RCH2;Q6NVG7	Procollagen galactosyltransferase 2	Colgalt2
0	0	0	0	278600	0	0	0	1	1	1	11.6	11.6	11.6	18.666	0.020513	0.73326	263490	1	Q9CQ13	Q9CQ13	Coordinator of PRMT5 and differentiation stimulator	Coprs
0	0	0	0	0	0	0	1000200	1	1	1	6.3	6.3	6.3	21.693	0.047957	0.4254	6399500	0	Q3THF9-2;Q3THF9	Q3THF9-2;Q3THF9	Coenzyme Q-binding protein COQ10 homolog B, mitochondrial	Coq10b
0	0	0	0	0	0	460660	0	2	2	2	5.3	5.3	5.3	53.12	0.0035336	1.2242	2418900	3	Q9WUM4;E9PZJ0;E9PVJ1;E9PX03	Q9WUM4;E9PZJ0;E9PVJ1;E9PX03	Coronin-1C;Coronin	Coro1c
582470	0	0	0	658780	0	0	0	3	3	3	20.7	20.7	20.7	19.53	0	5.0159	1756300	4	P19783;M0QWX7	P19783	Cytochrome c oxidase subunit 4 isoform 1, mitochondrial	Cox4i1
0	0	0	202010	0	0	0	0	1	1	1	6.2	6.2	6.2	16.101	0.047535	0.42399	1234100	1	P12787	P12787	Cytochrome c oxidase subunit 5A, mitochondrial	Cox5a
0	610650	2497700	526590	0	0	380950	0	2	2	2	46.5	46.5	46.5	4.8655	0.0034602	1.2082	5783000	5	A0A140LIU3;P56391	A0A140LIU3;P56391	Cytochrome c oxidase subunit 6B1	Cox6b1
0	0	0	0	0	0	0	155960	1	1	1	15.8	15.8	15.8	8.4689	0.0062696	1.0224	2375500	2	Q9CPQ1	Q9CPQ1	Cytochrome c oxidase subunit 6C	Cox6c
0	0	0	0	0	0	0	56352	1	1	1	12	12	12	9.2908	0.04712	0.41983	652920	1	P48771	P48771	Cytochrome c oxidase subunit 7A2, mitochondrial	Cox7a2
0	0	0	0	0	0	64797	0	1	1	1	1.9	1.9	1.9	52.783	0.041667	0.47745	341000	1	Q9D6C8;A0A0R4J1D0;A0A0R4J0J1;Q3UYN2;Q8BT60;P59108;Q1RLL3;Q9Z140;Q8BLR2;Q0VE82;Q9DC53;Q8JZW4	Q9D6C8;A0A0R4J1D0;A0A0R4J0J1;Q3UYN2;Q8BT60;P59108;Q1RLL3;Q9Z140;Q8BLR2;Q0VE82;Q9DC53;Q8JZW4	Copine-3;Copine-2;Copine-9;Copine-6;Copine-4;Copine-7;Copine-8;Copine-5	Cpne4;Cpne6;Cpne3;Cpne2;Cpne9;Cpne7;Cpne8;Cpne5
0	0	0	0	0	0	0	1469100	1	1	1	9.8	9.8	9.8	18.476	0.048414	0.39723	12396000	1	A0A0A6YXR6;A0A0A6YXN9;A0A0A6YY75;Q64735-2;Q64735	A0A0A6YXR6;A0A0A6YXN9;A0A0A6YY75;Q64735-2;Q64735	Complement component receptor 1-like protein	Cr1l
0	0	0	0	0	0	0	18753000	1	1	1	6.6	6.6	6.6	16.133	0.041584	0.47692	178250000	4	B8JJI3;B8JJI2;Q8CDG5	B8JJI3;B8JJI2;Q8CDG5	CREB3 regulatory factor	Crebrf
0	0	0	0	0	0	0	88339	1	1	1	5.5	5.5	5.5	24.767	0.048276	0.41328	249470	0	F7A4U8;Q9DC28-2;Q9DC28	F7A4U8;Q9DC28-2;Q9DC28	Casein kinase I isoform delta	Csnk1d
0	0	0	0	0	0	0	620400	1	1	1	5.1	5.1	5.1	22.072	1	-2	12820000	1	D3Z437;A0A087WR20;P49935	D3Z437;A0A087WR20;P49935	Pro-cathepsin H;Cathepsin H mini chain;Cathepsin H;Cathepsin H heavy chain;Cathepsin H light chain	Ctsh
0	0	0	0	0	0	437900	0	1	1	1	2.8	2.8	2.8	75.952	0.049404	0.40679	1222400	1	E9Q6Z0;E9PV12;G3X914;Q9D5V5	E9Q6Z0;E9PV12;G3X914;Q9D5V5	Cullin-5	Cul5
473430	0	366950	0	372820	0	451150	0	4	4	4	9.4	9.4	9.4	72.544	0	3.3432	2598500	6	A0A0R4J1E3;Q9QXS6-3;Q9QXS6;Q9QXS6-2;F7CPL2	A0A0R4J1E3;Q9QXS6-3;Q9QXS6;Q9QXS6-2;F7CPL2	Drebrin	Dbn1
0	0	239120	0	0	0	353250	0	2	2	2	21.6	21.6	21.6	12.942	0.0040323	1.5742	1070000	3	A0A0G2JGR9;Q80VB6;A0A0G2JGQ6;Q9JLM8-2;Q9JLM8	A0A0G2JGR9;Q80VB6;A0A0G2JGQ6;Q9JLM8-2;Q9JLM8	Serine/threonine-protein kinase DCLK1	Dclk1
0	0	0	0	0	0	0	116490	1	1	1	2.2	2.2	2.2	64.926	0.023923	0.64221	708690	1	A0A0A6YX33;A0A0A6YWI6;A0A0A6YX71;Q6PGN3-6;Q6PGN3-5;Q6PGN3-4;Q6PGN3-2;Q6PGN3;Q6PGN3-3	A0A0A6YX33;A0A0A6YWI6;A0A0A6YX71;Q6PGN3-6;Q6PGN3-5;Q6PGN3-4;Q6PGN3-2;Q6PGN3;Q6PGN3-3	Serine/threonine-protein kinase DCLK2	Dclk2
0	0	213210	171510	0	288020	233520	286070	2	2	2	2.4	2.4	2.4	126.82	0.0036232	1.2572	1496600	3	D3YX34;E9Q586;E9Q3M3;O08788-2;O08788	D3YX34;E9Q586;E9Q3M3;O08788-2;O08788	Dynactin subunit 1	Dctn1
0	747620	747620	757380	0	0	526750	633370	5	5	5	15.7	15.7	15.7	44.116	0	3.6312	4070900	8	Q99KJ8	Q99KJ8	Dynactin subunit 2	Dctn2
0	343060	344300	455080	0	0	267610	321870	3	3	3	2.5	2.5	2.5	126.85	0.0039216	1.5058	2017100	4	Q3U1J4	Q3U1J4	DNA damage-binding protein 1	Ddb1
0	0	0	0	0	0	191420	261450	2	2	2	2.7	2.7	2.7	82.499	0.0036364	1.2726	705000	3	Q91VR5	Q91VR5	ATP-dependent RNA helicase DDX1	Ddx1
0	0	0	1704000	0	0	0	0	1	1	1	1.7	1.7	1.7	59.514	0.009009	0.96657	1001800	1	Q9CWT6	Q9CWT6	Probable ATP-dependent RNA helicase DDX28	Ddx28
0	0	116380	0	0	260150	237580	231470	5	5	5	8.3	8.3	8.3	73.101	0	3.1789	1164500	7	Q62167;Q62095;P16381	Q62167;Q62095;P16381	ATP-dependent RNA helicase DDX3X;ATP-dependent RNA helicase DDX3Y;Putative ATP-dependent RNA helicase Pl10	Ddx3x;Ddx3y;D1Pas1
522810	0	334650	268690	391540	0	339940	620540	7	7	7	8.5	8.5	8.5	117.45	0	26.101	2929400	13	Q569Z5;F8WHR6;Q569Z5-2;A0A2R8VHK2	Q569Z5;F8WHR6;Q569Z5-2	Probable ATP-dependent RNA helicase DDX46	Ddx46
0	0	518310	326440	0	0	744270	399070	4	4	4	12.1	12.1	12.1	46.072	0	2.9003	2880800	7	S4R1I6;Q8BTS0;Q61656;Q3TU25;Q3U741;Q501J6-2;Q501J6;B1ARB9	S4R1I6;Q8BTS0;Q61656;Q3TU25;Q3U741;Q501J6-2;Q501J6	Probable ATP-dependent RNA helicase DDX5;Probable ATP-dependent RNA helicase DDX17	Ddx5;Ddx17
197450	0	0	0	0	0	0	0	2	2	2	2.5	2.5	2.5	89.431	0.0031646	1.0393	197450	2	Q6NS52-2;Q6NS52	Q6NS52-2;Q6NS52	Diacylglycerol kinase beta	Dgkb
0	0	0	0	0	1003700	0	0	1	1	1	0.6	0.6	0.6	267.48	0.047794	0.44056	2683300	1	E9QPU2;Q3V0Q1	E9QPU2;Q3V0Q1	Dynein heavy chain 12, axonemal	Dnah12
0	0	0	0	0	0	0	19285000	1	1	1	0.2	0.2	0.2	480.15	1	-2	105370000	2	Q91XQ0-2;Q8VHE6;Q91XQ0	Q91XQ0-2;Q8VHE6;Q91XQ0	Dynein heavy chain 8, axonemal;Dynein heavy chain 5, axonemal	Dnah8;Dnah5
1700400	3988500	4200800	1874800	0	0	0	0	9	9	9	20.8	20.8	20.8	63.232	0	44.86	16036000	21	Q5U458;E9Q8B3;A2A8D1	Q5U458;E9Q8B3	DnaJ homolog subfamily C member 11	Dnajc11
0	0	0	0	0	0	0	0	2	2	2	3.4	3.4	3.4	97.355	0.0032468	1.0939	0	2	Q3KR45;O88509-2;O88509;P0DOY1;A0A286YDX7;O88509-3;O88509-4	Q3KR45;O88509-2;O88509;P0DOY1;A0A286YDX7;O88509-3;O88509-4	DNA (cytosine-5)-methyltransferase 3B	Dnmt3b
0	0	0	0	0	0	0	195790	1	1	1	1.8	1.8	1.8	65.146	0.049488	0.40823	864870	1	A0A087WS26;A0A0R4J2B7;A0A087WRP5;A0A087WQ86;E9QM99;Q8BZN6;Q8BZN6-4;Q8BZN6-2;Q8BZN6-3	A0A087WS26;A0A0R4J2B7;A0A087WRP5;A0A087WQ86;E9QM99;Q8BZN6;Q8BZN6-4;Q8BZN6-2;Q8BZN6-3	Dedicator of cytokinesis protein 10	Dock10
0	0	1946800	1674900	0	0	825450	847590	9	9	9	4.1	4.1	4.1	332.91	0	10.095	7799200	15	E9Q557;E9PZW0	E9Q557;E9PZW0	Desmoplakin	Dsp
0	0	0	0	0	0	113640	0	1	1	1	7.3	7.3	7.3	18.521	0.043053	0.4758	628480	1	Q9R0P5	Q9R0P5	Destrin	Dstn
0	0	0	0	0	197860	0	0	1	1	1	6	6	6	28.442	0.01662	0.82442	138270	1	F6ZX84	F6ZX84		Dync1h1
1398500	1668800	1151700	938850	1591700	1598000	1450700	1282400	21	21	21	6.1	6.1	6.1	532.04	0	17.992	11113000	37	Q9JHU4	Q9JHU4	Cytoplasmic dynein 1 heavy chain 1	Dync1h1
0	0	422550	0	0	0	0	0	1	1	1	3.1	3.1	3.1	43.366	0.046875	0.41734	787300	1	F6QLS2;A0A1L1SRI6;A0A1L1SS48;Q45VK7;Q45VK7-2	F6QLS2;A0A1L1SRI6;A0A1L1SS48;Q45VK7;Q45VK7-2	Cytoplasmic dynein 2 heavy chain 1	Dync2h1
0	0	0	0	0	0	0	710220	1	1	1	12.4	12.4	12.4	10.35	0	7.1184	3559900	5	Q9D0M5;P63168	Q9D0M5;P63168	Dynein light chain 2, cytoplasmic;Dynein light chain 1, cytoplasmic	Dynll2;Dynll1
0	0	0	0	0	0	0	34650	1	1	1	6.3	6.3	6.3	26.63	0.035165	0.54897	168160	1	E9Q3J0;E0CX49;Q3UWX6	E9Q3J0;E0CX49;Q3UWX6		E330034G19Rik
0	526700	825490	0	0	555420	429350	476310	6	1	1	18	2.6	2.6	50.113	0.0035971	1.2543	3971700	6	P10126;D3Z3I8;D3YZ68	P10126;D3Z3I8;D3YZ68	Elongation factor 1-alpha 1	Eef1a1
1256100	3447300	3209800	2936100	5896500	2599800	2684800	3258200	7	7	2	23.1	23.1	7.8	50.454	0	4.6176	21450000	21	P62631	P62631	Elongation factor 1-alpha 2	Eef1a2
93012	0	0	0	0	0	0	0	1	1	1	34.9	34.9	34.9	4.6281	0.018817	0.79045	93012	1	M0QWK5;M0QWH8;G3UX43;G3UZ47;A0A087WS46;O70251	M0QWK5;M0QWH8;G3UX43;G3UZ47;A0A087WS46;O70251	Elongation factor 1-beta	Eef1b2;Eef1b
0	0	0	0	0	0	0	57184	1	1	1	3	3	3	50.06	0.024038	0.65949	297440	1	Q9D8N0	Q9D8N0	Elongation factor 1-gamma	Eef1g
0	0	0	0	0	0	310130	0	1	1	1	12.2	12.2	12.2	11.219	1	-2	595400	0	G3UZ25	G3UZ25		Eftud2
3324700	12923000	22640000	9842100	3790900	1114600	12883000	11797000	12	12	12	27.2	27.2	27.2	68.839	0	110.36	99709000	84	Q8BGD9;B2RWE8	Q8BGD9;B2RWE8	Eukaryotic translation initiation factor 4B	Eif4b
0	0	0	0	4067400	0	0	0	1	1	1	31.6	31.6	31.6	8.4395	0.0032258	1.0744	778450	1	J3QPS8;P63242	J3QPS8;P63242	Eukaryotic translation initiation factor 5A-1	Eif5a
0	1157800	1211500	781190	0	976660	1059700	703150	6	6	6	26.5	26.5	26.5	47.14	0	18.743	7757100	17	P17182;B0QZL1;Q6PHC1;A0A0N4SUI6;B1ARR6;B1ARR7;D3YVD3;D3Z2S4;D3Z6E4;A0A0N4SUX5;P17183;A0A0N4SUW8;Q5SX61;Q5SX60;Q5SX59;P21550	P17182;B0QZL1;Q6PHC1	Alpha-enolase;Enolase	Eno1
0	0	0	0	0	0	0	151990	1	1	1	12.4	12.4	12.4	11.035	0.048173	0.39409	544480	0	A0A0A6YY80	A0A0A6YY80		Entpd8
0	0	0	0	0	0	0	120700	2	2	2	4.5	4.5	4.5	67.253	0	2.1093	710550	2	A0A286YD84;A0A286YDY4;A7YY80;Q9WV92-7;Q9WV92-6;Q9WV92-4;Q9WV92-5;Q9WV92-3;Q9WV92;Q9WV92-2;Q9WV92-8;A0A286YCT6;A0A286YCY1	A0A286YD84;A0A286YDY4;A7YY80;Q9WV92-7;Q9WV92-6;Q9WV92-4;Q9WV92-5;Q9WV92-3;Q9WV92;Q9WV92-2;Q9WV92-8;A0A286YCT6;A0A286YCY1	Band 4.1-like protein 3;Band 4.1-like protein 3, N-terminally processed	Epb4.1l3;Epb41l3
0	1876300	572090	0	0	0	313460	418730	2	2	2	21.2	21.2	21.2	12.259	0	39.116	4398100	4	P84089;A0A1W2P7H9;A0A1W2P7T3;G3UW85	P84089;A0A1W2P7H9;A0A1W2P7T3;G3UW85	Enhancer of rudimentary homolog	Erh
0	0	0	0	0	0	0	103700	1	1	1	2.3	2.3	2.3	64.988	0.024155	0.66281	805190	2	Q5SUT0;Q5SUS9;Q61545	Q5SUT0;Q5SUS9;Q61545	RNA-binding protein EWS	Ewsr1
0	0	0	0	0	0	0	2037200	1	1	1	2.8	2.8	2.8	56.784	1	-2	4167300	1	Q8VEG4-2;Q8VEG4	Q8VEG4-2;Q8VEG4	Exonuclease 3-5 domain-containing protein 2	Exd2
0	0	0	0	0	0	0	83983	1	1	1	6.7	6.7	6.7	15.137	0.048822	0.40183	901290	1	Q05816	Q05816	Fatty acid-binding protein, epidermal	Fabp5
86108	0	0	0	0	0	0	0	1	1	1	11.2	11.2	11.2	11.538	0.0032154	1.0663	86108	1	E0CZ67;A0A087WSI2;Q8C729;Q8C729-2	E0CZ67;A0A087WSI2;Q8C729;Q8C729-2	Protein FAM126B	Fam126b
0	0	0	0	0	0	0	155660	2	2	2	17.4	17.4	17.4	13.025	0.016393	0.80979	789900	2	A0A0G2JF33;A0A0G2JEE9;Q9CVI2-2;Q9CVI2	A0A0G2JF33;A0A0G2JEE9;Q9CVI2-2;Q9CVI2	Protein FAM133B	Fam133b
0	0	0	0	0	0	0	107060	1	1	1	0.8	0.8	0.8	142.13	0.020101	0.70375	1009000	2	Q8BGE5-4;Q8BGE5	Q8BGE5-4;Q8BGE5	Fanconi anemia group M protein homolog	Fancm
0	0	0	0	0	0	0	6237500	1	1	1	7.5	7.5	7.5	14.416	0.003861	1.4372	27089000	6	Q642K5;P62862	Q642K5;P62862	40S ribosomal protein S30	Fau
0	0	40727000	0	0	0	0	0	1	1	1	19.7	19.7	19.7	15.139	0.047788	0.4252	75883000	1	S4R2I0;F6T356;Q7TPD1-3;Q7TPD1-2;Q7TPD1	S4R2I0;F6T356;Q7TPD1-3;Q7TPD1-2;Q7TPD1	F-box only protein 11	Fbxo11
0	0	0	0	185000	0	0	0	1	1	1	8.1	8.1	8.1	20.123	0.036885	0.49777	116940	1	F8WGG1;Q9CRA9-2;Q9CRA9	F8WGG1;Q9CRA9-2;Q9CRA9	FGFR1 oncogene partner 2 homolog	Fgfr1op2
0	0	0	0	0	0	0	8997100	1	1	1	3	3	3	50.052	0.014085	0.84498	27725000	1	P97807-2;P97807	P97807-2;P97807	Fumarate hydratase, mitochondrial	Fh
0	0	0	0	0	0	0	103360	1	1	1	1.9	1.9	1.9	101.85	0.041825	0.46617	331540	1	Q6P6L0-3;E0CYM1	Q6P6L0-3;E0CYM1		Filip1l
0	0	0	0	387760	0	0	0	1	1	1	0.8	0.8	0.8	148.45	0.038627	0.52654	832120	1	E9Q7P6;Q05860-6;Q05860-5;Q05860-3;Q05860-2;Q05860	E9Q7P6;Q05860-6;Q05860-5;Q05860-3;Q05860-2;Q05860	Formin-1	Fmn1
0	0	0	0	0	0	0	0	1	1	1	1	1	1	81.232	1	-2	0	1	Q0VDM6;O35409	Q0VDM6;O35409	Glutamate carboxypeptidase 2	Folh1
0	924780	677110	542690	0	0	0	525620	2	2	2	17.7	17.7	17.7	13.897	0	13.393	3475000	4	G3UXT7;F6QCI0;Q8CFQ9;Q8BQ46;P56959	G3UXT7;F6QCI0;Q8CFQ9;Q8BQ46;P56959	RNA-binding protein FUS	Fus;Taf15
0	0	0	0	0	0	0	702180	1	1	1	1.5	1.5	1.5	69.115	0.041509	0.45852	3936200	1	Q6P9S7	Q6P9S7	Polypeptide N-acetylgalactosaminyltransferase 10	Galnt10
11841000	12852000	11277000	8157800	17023000	6216700	8923400	7586600	11	11	11	37.9	37.9	37.9	38.653	0	52.571	86120000	62	A0A0A0MQF6;P16858;S4R1W1;A0A1D5RLD8;S4R257;S4R1W8;V9GX06;S4R1N5;V9GXA7;A0A0R4J0X7;S4R2G5;Q64467	A0A0A0MQF6;P16858;S4R1W1;A0A1D5RLD8;S4R257	Glyceraldehyde-3-phosphate dehydrogenase	Gapdh;Gm3839
0	0	0	0	0	0	0	1177300	1	1	1	7.4	7.4	7.4	16.595	0.016216	0.79949	135230000	2	Q9D8I3	Q9D8I3	Glyoxalase domain-containing protein 5	Glod5
0	677260	987520	507640	0	0	717570	0	3	3	3	13.1	13.1	13.1	42.119	0	5.7339	4373900	8	P15105	P15105	Glutamine synthetase	Glul
632260	498300	661900	435360	414770	781170	618030	853970	3	3	3	19.7	19.7	19.7	20.266	0	2.0501	5147200	10	E9PYL9;Q9CXW4;E9PZB3;A2BH06	E9PYL9;Q9CXW4;E9PZB3	60S ribosomal protein L11	Gm10036;Rpl11;Gm5093
749030	1393700	1491100	1509000	0	1349400	1672400	2078700	5	5	5	27.6	27.6	27.6	17.671	0	18.961	11878000	19	F6YVP7;A0A1Y7VKY1;P62270;S4R1N6	F6YVP7;A0A1Y7VKY1;P62270;S4R1N6	40S ribosomal protein S18	Gm10260;Rps18
0	0	0	0	0	0	0	0	1	1	1	1.5	1.5	1.5	62.44	1	-2	0	1	A2AGB2	A2AGB2	Uncharacterized protein C1orf87 homolog	Gm12695
0	0	0	0	0	0	1022800	0	1	1	1	11	11	11	20.643	0.047776	0.3901	3908700	1	A0A087WPG5	A0A087WPG5		Gm13283
0	0	0	0	0	0	0	0	1	1	1	5.3	5.3	5.3	41.153	0.042718	0.47355	0	1	L7N246;A2AW66;A2ARR6	L7N246;A2AW66;A2ARR6		Gm14322;Gm14418
0	0	0	0	0	0	0	0	1	1	1	3.9	3.9	3.9	29.431	1	-2	0	1	Q4V784	Q4V784		Gm14403
0	0	0	0	0	0	52002	0	1	1	1	1	1	1	142.06	0.041045	0.45599	66188	0	B1AXN3	B1AXN3		Gm382
0	0	0	0	0	2199300	0	0	1	1	1	6.5	6.5	6.5	18.25	0.042802	0.47457	1536900	1	L7N474;K7N7D7;J3QNG9;Q2TB45;A3KN63;F6VCN9;L7N294;L7N291;F7D1B3;F7AXK2;F6YJZ8	L7N474;K7N7D7;J3QNG9;Q2TB45;A3KN63;F6VCN9;L7N294;L7N291;F7D1B3;F7AXK2;F6YJZ8		Gm5861;Gm8871;Gm8897;Gm6460;4933402N22Rik;Gm8857
0	0	0	0	0	0	4113900	0	1	1	1	6.6	6.6	6.6	22.063	0.048474	0.43473	9853600	1	Q8R1L8	Q8R1L8	Angiopoietin-like protein 8	Gm6484
0	0	0	0	0	0	98544	0	1	1	1	6.6	6.6	6.6	26.59	0.047872	0.42533	780380	1	F6WLE9;F6QI24	F6WLE9;F6QI24		Gm8020;Gm7945
0	9428900	7105600	4561800	0	21606000	3240600	0	3	3	3	44.2	44.2	44.2	8.7279	0	8.6566	46990000	7	A0A0A6YW67;E9Q9J0;E9Q4P0;E9Q5F6;E9QNP0;Q5SX22;P62984;P62983;P0CG49;P0CG50;D3YYZ2	A0A0A6YW67;E9Q9J0;E9Q4P0;E9Q5F6;E9QNP0;Q5SX22;P62984;P62983;P0CG49;P0CG50	Ubiquitin-60S ribosomal protein L40;Ubiquitin;60S ribosomal protein L40;Ubiquitin-40S ribosomal protein S27a;Ubiquitin;40S ribosomal protein S27a;Polyubiquitin-B;Ubiquitin;Polyubiquitin-C;Ubiquitin;Ubiquitin-related 1;Ubiquitin-related 2	Gm8797;Uba52;Kxd1;Ubc;Ubb;Rps27a
117150	0	0	0	0	0	0	0	1	1	1	10.6	10.6	10.6	13.795	0.031746	0.59141	117150	1	Q8C5I4	Q8C5I4		Gm9982
2283800	1371000	1393900	705390	1414500	1393100	952000	1110100	8	8	8	27.7	27.7	27.7	40.036	0	6.3385	9385800	19	P18872-2;P18872;D3Z2M7;F7BLT7;P08752;Q9DC51;B2RSH2;A2A610;A0A0A6YWA9;A2AE32;Q66L47;Z4YKV1;P63094;Q6R0H7-4;A2AE31;Q8CGK7;P63094-2;Q3V3I2;P50149;P20612;Q6R0H7	P18872-2;P18872;D3Z2M7;F7BLT7	Guanine nucleotide-binding protein G(o) subunit alpha	Gnao1
0	465860	446020	354590	0	363020	294760	0	2	2	2	23.1	23.1	23.1	12.285	0.0037453	1.3076	2269000	3	H3BLF7;H3BKR2;P62874;D3Z1T4;D3Z1M1;D3YZX3;E9QKR0;P62880;P29387	H3BLF7;H3BKR2;P62874;D3Z1T4;D3Z1M1;D3YZX3;E9QKR0;P62880;P29387	Guanine nucleotide-binding protein G(I)/G(S)/G(T) subunit beta-1;Guanine nucleotide-binding protein G(I)/G(S)/G(T) subunit beta-2;Guanine nucleotide-binding protein subunit beta-4	Gnb1;Gnb2;Gnb4
0	0	0	0	314230	0	0	0	1	1	1	22.5	22.5	22.5	7.8501	0.016713	0.8283	246640	1	P63213	P63213	Guanine nucleotide-binding protein G(I)/G(S)/G(O) subunit gamma-2	Gng2
0	473650	487740	325990	0	0	374410	413890	5	5	5	4.4	4.4	4.4	162.89	0	3.8036	2673700	6	A0A0R4J1H6;E9QP99;P55937-1;P55937	A0A0R4J1H6;E9QP99;P55937-1;P55937	Golgin subfamily A member 3	Golga3
507820	0	0	0	0	0	0	0	1	1	1	4.3	4.3	4.3	31.149	0.035088	0.54807	507820	1	P35802	P35802	Neuronal membrane glycoprotein M6-a	Gpm6a
0	0	0	0	197910	0	0	0	1	1	1	4.3	4.3	4.3	33.515	0.01847	0.76874	192500	1	A2AEG3;A2AEG6;P35803-5;P35803-4;P35803-3;P35803-8;P35803-2;P35803	A2AEG3;A2AEG6;P35803-5;P35803-4;P35803-3;P35803-8;P35803-2;P35803	Neuronal membrane glycoprotein M6-b	Gpm6b
0	0	0	0	0	0	0	7981400	1	1	1	2.5	2.5	2.5	83.998	0.016349	0.80913	17628000	1	Q8K4Z6-2;Q8K4Z6	Q8K4Z6-2;Q8K4Z6	G-protein coupled receptor family C group 6 member A	Gprc6a
0	0	0	0	0	0	41746	0	1	1	1	0.9	0.9	0.9	165.42	1	-2	90156	0	P35436	P35436	Glutamate receptor ionotropic, NMDA 2A	Grin2a
0	0	0	0	0	0	0	18122000	1	1	1	1.7	1.7	1.7	85.941	0.037815	0.50486	41626000	2	P13020	P13020	Gelsolin	Gsn
0	0	0	0	0	0	0	2405500	1	1	1	4.3	4.3	4.3	19.109	0.037113	0.4986	47231000	7	A0A217FL53;Q99ME9	A0A217FL53;Q99ME9	Nucleolar GTP-binding protein 1	Gtpbp4
0	0	0	0	0	0	0	628170	1	1	1	10.3	10.3	10.3	9.1182	0.041905	0.46662	4050400	4	G3UWL7;C0HKE1;C0HKE9;C0HKE8;C0HKE6;C0HKE5;C0HKE4;Q3UA95;C0HKE2;C0HKE3;C0HKE7;Q8CGP4;A0A0N4SV66;Q64523;Q8R1M2;Q8CGP6;P0C0S6;Q8BFU2;Q3THW5;Q6GSS7;Q8CGP7;Q8CGP5;Q64522;P27661	G3UWL7;C0HKE1;C0HKE9;C0HKE8;C0HKE6;C0HKE5;C0HKE4;Q3UA95;C0HKE2;C0HKE3;C0HKE7;Q8CGP4;A0A0N4SV66;Q64523;Q8R1M2;Q8CGP6;P0C0S6;Q8BFU2;Q3THW5;Q6GSS7;Q8CGP7;Q8CGP5;Q64522;P27661	Histone H2A;Histone H2A type 2-C;Histone H2A.J;Histone H2A type 1-H;Histone H2A.Z;Histone H2A type 3;Histone H2A.V;Histone H2A type 2-A;Histone H2A type 1-K;Histone H2A type 1-F;Histone H2A type 2-B;Histone H2AX	H2afz;Hist1h2aa;Hist2h2ac;H2afj;Hist1h2ah;Hist3h2a;H2afv;Hist2h2aa1;Hist1h2ak;Hist1h2af;Hist2h2ab;H2afx
0	0	0	0	0	0	0	0	1	1	1	5.9	5.9	5.9	13.322	0.021792	0.67392	0	1	E0CZ27;F8WI35;A0A1W2P768;P84244;P84228;P68433;P02301	E0CZ27;F8WI35;A0A1W2P768;P84244;P84228;P68433;P02301	Histone H3;Histone H3.3;Histone H3.2;Histone H3.1;Histone H3.3C	H3f3a;Hist1h3b;Hist1h3a;H3f3c
0	0	0	0	625630	0	0	0	2	2	2	5.1	5.1	5.1	82.669	0.0033784	1.177	125950	2	Q8BMS1	Q8BMS1	Trifunctional enzyme subunit alpha, mitochondrial;Long-chain enoyl-CoA hydratase;Long chain 3-hydroxyacyl-CoA dehydrogenase	Hadha
1130700	1006500	688630	706280	0	720390	638530	449380	4	4	4	45.8	45.8	45.8	15.112	0	3.2835	6128200	11	Q91VB8;P01942	Q91VB8;P01942	Hemoglobin subunit alpha	haemaglobin alpha 2;Hba
0	0	0	0	450380	0	0	0	3	1	1	27.9	12.9	12.9	15.878	0.048193	0.4113	92997	1	P02089	P02089	Hemoglobin subunit beta-2	Hbb-b2
1800600	2477000	2366000	2480800	4933000	1922900	2118000	2073300	4	4	2	36.7	36.7	21.8	15.748	0	6.6815	14200000	22	A8DUK4;E9Q223;P02088;CON__P02070;CON__Q3SX09;P02104	A8DUK4;E9Q223;P02088	Hemoglobin subunit beta-1	Hbbt1;Hbb-bs;Hbb-b1
777530	0	0	0	645190	0	0	0	5	5	5	6.4	6.4	6.4	125.79	0	4.58	2180800	8	Q9Z2V5;A0A1B0GX25;B1AUA8	Q9Z2V5;A0A1B0GX25	Histone deacetylase 6	Hdac6
0	825340	200310	0	0	0	0	0	2	2	2	11.9	11.9	11.9	22.43	0.014577	0.91266	1306500	2	Q9JMG7;Q9JMG7-2	Q9JMG7;Q9JMG7-2	Hepatoma-derived growth factor-related protein 3	Hdgfrp3
0	0	0	0	0	0	443910	0	1	1	1	3.4	3.4	3.4	30.424	0.024096	0.65968	2390300	1	Q8BLR9-2;Q8BLR9	Q8BLR9-2;Q8BLR9	Hypoxia-inducible factor 1-alpha inhibitor	Hif1an
0	0	0	0	0	0	0	762980	3	1	1	15.1	5.7	5.7	21.266	0.0037594	1.3547	9359100	2	P15864;P43277;I7HFT9;Q07133;P43275	P15864;P43277	Histone H1.2;Histone H1.3	Hist1h1c;Hist1h1d
0	11405000	3137900	2996100	0	1630100	3559300	2177200	4	4	2	21.9	21.9	12.8	21.977	0	3.7562	28033000	18	P43274	P43274	Histone H1.4	Hist1h1e
0	0	0	0	0	0	0	67476	1	1	1	11.2	11.2	11.2	14.888	0	64.834	5331300	4	Q8CBB6;Q9D2U9;Q8CGP2;Q8CGP1;Q8CGP0;Q6ZWY9;Q64525;Q64524;Q64478;Q64475;P10854;P10853;Q8CGP2-2	Q8CBB6;Q9D2U9;Q8CGP2;Q8CGP1;Q8CGP0;Q6ZWY9;Q64525;Q64524;Q64478;Q64475;P10854;P10853;Q8CGP2-2	Histone H2B;Histone H2B type 3-A;Histone H2B type 1-P;Histone H2B type 1-K;Histone H2B type 3-B;Histone H2B type 1-C/E/G;Histone H2B type 2-B;Histone H2B type 2-E;Histone H2B type 1-H;Histone H2B type 1-B;Histone H2B type 1-M;Histone H2B type 1-F/J/L	Hist1h2br;Hist3h2ba;Hist1h2bp;Hist1h2bk;Hist3h2bb;Hist1h2bc;Hist2h2bb;Hist2h2be;Hist1h2bh;Hist1h2bb;Hist1h2bm;Hist1h2bf
0	475520	410290	687900	0	453610	459670	475840	2	2	2	17.5	17.5	17.5	11.367	0.0035088	1.2217	3142800	3	P62806	P62806	Histone H4	Hist1h4a
0	0	0	0	0	0	0	138420	1	1	1	10.3	10.3	10.3	9.4226	0.041257	0.47647	2131900	1	A0A338P6G6;Q3TE85;A0A338P6E8;A0A338P6F6;P17095-1;P17095	A0A338P6G6;Q3TE85;A0A338P6E8;A0A338P6F6;P17095-1;P17095	High mobility group protein HMG-I/HMG-Y	Hmga1
0	0	0	0	0	0	626180	683360	3	3	3	10.7	10.7	10.7	38.833	0	2.145	2384800	6	Q5EBP8;P49312;P49312-2	Q5EBP8;P49312;P49312-2	Heterogeneous nuclear ribonucleoprotein A1;Heterogeneous nuclear ribonucleoprotein A1, N-terminally processed	Hnrnpa1
0	454950	831270	506970	0	0	443300	0	3	3	3	13.6	13.6	13.6	32.46	0	4.0464	3377900	5	O88569-3;O88569-2;O88569;A0A0N4SUM2	O88569-3;O88569-2;O88569;A0A0N4SUM2	Heterogeneous nuclear ribonucleoproteins A2/B1	Hnrnpa2b1
0	572960	785110	730360	0	0	571460	741130	3	3	3	12.9	12.9	12.9	34.476	0	7.2516	4334600	8	A2AL12;B2RXM2;J3QNY1;Q8BG05-2;Q8BG05;A2AL13	A2AL12;B2RXM2;J3QNY1;Q8BG05-2;Q8BG05	Heterogeneous nuclear ribonucleoprotein A3	Hnrnpa3;Gm6793;Gm9242
0	0	0	854320	0	0	674820	620830	2	2	2	9.9	9.9	9.9	36.21	0	5.7428	3419700	6	Q20BD0;Q80XR6;Q99020	Q20BD0;Q80XR6;Q99020	Heterogeneous nuclear ribonucleoprotein A/B	Hnrnpab
0	706150	697300	735030	0	0	632850	0	2	2	2	22.4	22.4	22.4	12.139	0	4.7431	4543600	6	E9Q5B6;F6ZV59;G5E8G0;G3X9W0;Q60668-4;Q60668-3;Q60668-2;Q60668;F6SHF3	E9Q5B6;F6ZV59;G5E8G0;G3X9W0;Q60668-4;Q60668-3;Q60668-2;Q60668;F6SHF3	Heterogeneous nuclear ribonucleoprotein D0	Hnrnpd
0	501850	609480	476360	0	636290	987340	900640	4	4	4	12.7	12.7	12.7	51.217	0	3.2346	5032300	11	Q8C2Q7;O35737;P70333;Q9Z2X1-2;Q9Z2X1	Q8C2Q7;O35737;P70333;Q9Z2X1-2;Q9Z2X1	Heterogeneous nuclear ribonucleoprotein H;Heterogeneous nuclear ribonucleoprotein H, N-terminally processed;Heterogeneous nuclear ribonucleoprotein H2;Heterogeneous nuclear ribonucleoprotein F;Heterogeneous nuclear ribonucleoprotein F, N-terminally processed	Hnrnph1;Hnrnph2;Hnrnpf
2270100	1098900	1046800	957190	2118900	808930	1371000	1127900	9	9	9	27.8	27.8	27.8	51.028	0	9.1979	9887100	17	P61979-2;P61979;P61979-3;B2M1R6;H3BLL4;A0A286YDM3;H3BKD0;H3BK96;H3BKI8;A0A286YCM2;H3BLP7;A0A286YEC4;A0A286YDH1;Q8BT23;H3BJ43;H3BJS9;A0A286YE41	P61979-2;P61979;P61979-3;B2M1R6;H3BLL4;A0A286YDM3;H3BKD0;H3BK96	Heterogeneous nuclear ribonucleoprotein K	Hnrnpk
1581900	1701100	2054100	1288900	1252400	1643000	2643100	3165800	7	7	7	11.5	11.5	11.5	86.805	0	7.2299	18877000	17	Q8VEK3-2;Q8VEK3	Q8VEK3-2;Q8VEK3	Heterogeneous nuclear ribonucleoprotein U	Hnrnpu
0	0	85628	0	0	0	0	0	1	1	1	5.5	5.5	5.5	18.48	0.041339	0.47656	273730	1	A2AM62;A2AM63;A2AM65;Z4YKA3;Z4YKB8;Q3TEA8-3;Q3TEA8-2;Q3TEA8	A2AM62;A2AM63;A2AM65;Z4YKA3;Z4YKB8;Q3TEA8-3;Q3TEA8-2;Q3TEA8	Heterochromatin protein 1-binding protein 3	Hp1bp3
0	0	0	0	0	0	554550	0	1	1	1	0.9	0.9	0.9	98.128	0.047541	0.38882	3751600	1	E9PZY1;Q91VB4	E9PZY1;Q91VB4	Hermansky-Pudlak syndrome 3 protein homolog	Hps3
0	489870	444290	0	0	0	433860	402430	4	4	1	8.2	8.2	3.7	84.787	0	5.7263	4056300	6	P07901;E9Q3D6;B7ZC50	P07901;E9Q3D6	Heat shock protein HSP 90-alpha	Hsp90aa1;Hsp90ab1
0	0	0	0	1904300	0	0	0	4	1	1	8.3	3.7	3.7	83.28	0.0032573	1.1044	409890	1	P11499	P11499	Heat shock protein HSP 90-beta	Hsp90ab1
0	0	84612	0	0	0	184530	0	4	4	4	7.4	7.4	7.4	74.87	0	1.9961	1184200	4	Q8K0U4;Q9CZJ2	Q8K0U4	Heat shock 70 kDa protein 12A	Hspa12a
0	0	0	0	813020	0	0	0	8	1	1	15.8	3.6	3.6	69.641	0.0091743	0.97588	190130	2	P17156	P17156	Heat shock-related 70 kDa protein 2	Hspa2
0	0	0	0	0	0	0	64608	4	2	2	9	4.9	4.9	72.421	0.0038168	1.3966	583860	2	P20029	P20029	78 kDa glucose-regulated protein	Hspa5
7852200	7138900	7516400	4047800	6476600	5645300	4546500	5787700	20	20	13	38.9	38.9	26.6	68.778	0	27.248	55479000	66	Q504P4;P63017;D3Z5E2;Q61696;P16627;P17879	Q504P4;P63017	Heat shock cognate 71 kDa protein	Hspa8
0	0	0	0	0	0	0	69339	1	1	1	1.6	1.6	1.6	60.955	0.048443	0.41516	364710	1	P63038	P63038	60 kDa heat shock protein, mitochondrial	Hspd1
0	0	0	0	0	0	0	113800	1	1	1	2.9	2.9	2.9	42.194	0.030023	0.60332	536990	1	Q91VA7	Q91VA7	Isocitrate dehydrogenase [NAD] subunit, mitochondrial	Idh3b
0	0	0	0	0	0	0	283220	1	1	1	2.5	2.5	2.5	54.841	0	2.1788	76156000	9	A0A1Y7VJX7;F6W6U3;P06336	A0A1Y7VJX7;F6W6U3;P06336	Ig epsilon chain C region	Ighe
2396700000	1697100000	1538900000	742330000	1735000000	1979100000	2525900000	1072100000	15	15	15	53.1	53.1	53.1	35.704	0	323.31	15749000000	789	P01868;P01869;A0A075B5P4;A0A0A6YWR2	P01868;P01869;A0A075B5P4;A0A0A6YWR2	Ig gamma-1 chain C region secreted form;Ig gamma-1 chain C region, membrane-bound form	Ighg1
0	753330	257450	835760	0	586640	559520	0	3	3	3	8.8	8.8	8.8	49.943	0	3.8204	3124800	7	A0A075B5P6;A0A075B6A0;P01872;P01872-2	A0A075B5P6;A0A075B6A0;P01872;P01872-2	Ig mu chain C region	Ighm
0	0	0	0	0	0	4089700	0	1	1	1	1.4	1.4	1.4	97.496	0.023866	0.64166	27494000	1	D3Z5P5;A0A0B4J1E3;P40694	D3Z5P5;A0A0B4J1E3;P40694	DNA-binding protein SMUBP-2	Ighmbp2
95530	0	0	0	0	0	0	0	1	1	1	10.3	10.3	10.3	12.975	0.034934	0.54304	95530	1	A0A075B5R9;A0A075B5R4	A0A075B5R9;A0A075B5R4		Ighv14-3;Ighv14-1
0	174260000	42839000	26007000	0	113640000	58185000	2757300	1	1	1	14.3	14.3	14.3	10.761	0	152.05	441840000	40	A0A075B5V7;A0A075B5V6;A0A075B5V1;A0A075B5U6;A0A0A6YY38;A0A0A6YXN5;A0A0A6YX66;A0A0A6YWK5;A0A075B5V2;A0A075B5V0;A0A075B5U7;P06330	A0A075B5V7;A0A075B5V6;A0A075B5V1;A0A075B5U6;A0A0A6YY38;A0A0A6YXN5;A0A0A6YX66;A0A0A6YWK5;A0A075B5V2;A0A075B5V0;A0A075B5U7;P06330	Ig heavy chain V region AC38 205.12	Ighv1-43;Ighv1-42;Ighv1-31;Ighv1-20;Ighv1-34;Ighv1-26;Ighv1-22
0	2481200	2865300	0	0	0	8582700	0	1	1	1	13.3	13.3	13.3	10.976	0	12.447	19861000	7	A0A075B5X6;A0A0G2JFN9	A0A075B5X6;A0A0G2JFN9		Ighv1-67
0	514880	188650	302920	0	231650	265630	0	2	2	2	23.3	23.3	23.3	12.874	0.003937	1.5228	1594100	3	A0A075B5R5;A0A075B5P7;A0A0A6YWG4;A0A0A6YVX8;A0A075B5Q2;P01806;P18524;P01812;P01809;P01810;P01808;P01807	A0A075B5R5;A0A075B5P7;A0A0A6YWG4;A0A0A6YVX8;A0A075B5Q2;P01806;P18524;P01812;P01809;P01810;P01808;P01807	Ig heavy chain V region 441;Ig heavy chain V region RF;Ig heavy chain V region MOPC 173;Ig heavy chain V region X24;Ig heavy chain V region J539;Ig heavy chain V region T601;Ig heavy chain V region X44	Ighv4-1;Ighv5-2;Ighv5-12-4;Ighv5-9
0	0	0	0	0	0	79536	0	1	1	1	9.5	9.5	9.5	12.943	0.023641	0.63317	309060	3	A0A075B5Q9;A0A0A6YWC7;A0A075B5R1;A0A075B5Q4;A0A075B5Q0;A0A075B5P9;P18527;P18528;P18529;P18526;P18525;P01783	A0A075B5Q9;A0A0A6YWC7;A0A075B5R1;A0A075B5Q4;A0A075B5Q0;A0A075B5P9;P18527;P18528;P18529;P18526;P18525;P01783	Ig heavy chain V region 914;Ig heavy chain V region 6.96;Ig heavy chain V region 5-76;Ig heavy chain V region 345;Ig heavy chain V region 5-84;Ig heavy chain V region MOPC 21	Ighv5-15;Ighv5-17;Ighv5-12;Ighv5-6;Ighv5-4
0	0	0	0	0	0	75214	0	1	1	1	11.2	11.2	11.2	10.934	0.048128	0.42831	339010	1	A0A075B5S9;A0A0B4J1J5;A0A0B4J1J4;A0A0A6YWH6	A0A075B5S9;A0A0B4J1J5;A0A0B4J1J4;A0A0A6YWH6		Ighv9-4;Ighv9-3;Ighv9-2
0	0	0	0	142830	0	0	0	1	1	1	18.9	18.9	18.9	10.429	0.0093168	1.0103	129780	1	A0A075B5L0;P01647;P01645;P01644;P01643	A0A075B5L0;P01647;P01645;P01644;P01643	Ig kappa chain V-V region HP 124E1;Ig kappa chain V-V region HP 93G7;Ig kappa chain V-V region HP R16.7;Ig kappa chain V-V region MOPC 173	Igkv10-95
863670000	937320000	974510000	415310000	454930000	1610100000	1350500000	1082900000	5	5	5	20.2	20.2	20.2	13.117	0	103.9	7508600000	175	A0A140T8M0;A0A0B4J1I0;P01631;A0A075B5K8;F6XWB2;A0A140T8N1;A0A140T8M9;A0A075B5N0;A0A0G2JDE5	A0A140T8M0;A0A0B4J1I0;P01631;A0A075B5K8;F6XWB2;A0A140T8N1	Ig kappa chain V-II region 26-10	Igkv1-110;Igkv1-99;Igkv1-115
0	0	0	0	0	0	0	124010	1	1	1	18.2	18.2	18.2	10.856	0	1.9356	732630	3	A0A075B5N9;P01668;P01659;P01665;P01672;P01671;P01670;P01669;P01667;P01666;P03977;P01664;P01660;P01657;P01656;P01654;P01673;P01655	A0A075B5N9;P01668;P01659;P01665;P01672;P01671;P01670;P01669;P01667;P01666;P03977;P01664;P01660;P01657;P01656;P01654;P01673;P01655	Ig kappa chain V-III region PC 7210;Ig kappa chain V-III region TEPC 124;Ig kappa chain V-III region PC 7043;Ig kappa chain V-III region PC 7940;Ig kappa chain V-III region PC 7175;Ig kappa chain V-III region PC 6684;Ig kappa chain V-III region PC 7769;Ig kappa chain V-III region PC 6308;Ig kappa chain V-III region PC 7183;Ig kappa chain V-III region 50S10.1;Ig kappa chain V-III region CBPC 101;I…	Igkv3-7
72227	0	0	0	0	0	0	0	2	2	2	31.6	31.6	31.6	10.345	0.0037037	1.3022	72227	2	A0A075B5M7;A0A0G2JDV4;A0A0B4J1J2;A0A0B4J1J1	A0A075B5M7;A0A0G2JDV4;A0A0B4J1J2;A0A0B4J1J1		Igkv5-39;Igkv5-43;Igkv5-45
195750	0	0	0	0	0	0	0	2	2	2	18	18	18	10.976	0.0092879	1.0009	195750	2	A0A075B5N4;A0A140T8P7;A0A0G2JF28;A0A140T8M3;A0A140T8M4;A0A075B5N3;A0A140T8N7;A0A140T8N5;A0A0G2JFN8;A0A140T8P5;A0A0G2JE47	A0A075B5N4;A0A140T8P7;A0A0G2JF28;A0A140T8M3;A0A140T8M4;A0A075B5N3;A0A140T8N7;A0A140T8N5;A0A0G2JFN8;A0A140T8P5;A0A0G2JE47		Igkv8-27;Igkv8-28
0	0	0	256080	0	0	0	0	1	1	1	17.8	17.8	17.8	5.2721	1	-2	146960	1	G3UXB0;P07750	G3UXB0;P07750	Interleukin-4	Il4
1622900	2518900	4786300	1398000	675210	0	247540	472510	10	10	10	17.7	17.7	17.7	82.928	0	8.2346	14145000	17	Q8CAQ8-2;Q8CAQ8;Q8CAQ8-5;E9Q800;Q8CAQ8-3;E9QAY6;A0A0U1RP81;A0A1B0GX08;A0A0U1RQ14;E9PVS5	Q8CAQ8-2;Q8CAQ8;Q8CAQ8-5;E9Q800;Q8CAQ8-3;E9QAY6;A0A0U1RP81	MICOS complex subunit Mic60	Immt
0	0	0	0	0	648550	0	0	1	1	1	1.4	1.4	1.4	105.16	0.048301	0.43	4484200	1	E9PVM1	E9PVM1		Inpp4b
0	0	0	0	0	10587000	0	0	1	1	1	11.2	11.2	11.2	11.343	0.023981	0.64686	19497000	4	D6RES6;Q5U4C5;Q8VI75	D6RES6;Q5U4C5;Q8VI75	Importin-4	Ipo4
0	0	0	0	0	620300	344630	618740	6	6	6	5.6	5.6	5.6	133.35	0	4.69	2883700	9	B1ASP2;P52332;E9QJS1;Q9R117	B1ASP2;P52332	Tyrosine-protein kinase;Tyrosine-protein kinase JAK1	Jak1
0	703590	1856200	1311400	0	639950	598180	636830	7	7	7	13.3	13.3	13.3	81.8	0	7.5918	6962400	13	Q02257	Q02257	Junction plakoglobin	Jup
0	0	0	0	0	0	491760	0	1	1	1	2.4	2.4	2.4	56.215	0.03666	0.49664	781560	0	E9PZI6	E9PZI6	Katanin p60 ATPase-containing subunit A1	Katna1
0	0	0	0	0	0	0	0	1	1	1	7.8	7.8	7.8	17.522	0.048013	0.39374	0	1	D3YWJ8;D3YYB5;G5E8P9;Q8K0T4	D3YWJ8;D3YYB5;G5E8P9;Q8K0T4	Katanin p60 ATPase-containing subunit A-like 1	Katnal1
0	0	0	0	0	0	0	1928800	1	1	1	1.5	1.5	1.5	126.91	1	-2	5595500	1	G3X9P7;O54982	G3X9P7;O54982	Potassium channel subfamily U member 1	Kcnu1
0	0	0	0	0	1050200	0	0	1	1	1	2	2	2	55.429	0.0089552	0.96163	733880	1	Q9DCV6	Q9DCV6	Death ligand signal enhancer	Kiaa0141
0	0	0	0	0	0	0	93205	1	1	1	1.6	1.6	1.6	75.968	0.029817	0.60035	306400	1	F8VQ42;E0CZ72;P28740-2;P28740;P28740-1	F8VQ42;E0CZ72;P28740-2;P28740;P28740-1	Kinesin-like protein;Kinesin-like protein KIF2A	Kif2a
0	320440	0	0	0	0	0	0	2	2	2	2.5	2.5	2.5	109.27	0.004065	1.592	914250	2	P28738;E9QAK5;Q61768;P33175	P28738;E9QAK5;Q61768;P33175	Kinesin heavy chain isoform 5C;Kinesin-like protein;Kinesin-1 heavy chain;Kinesin heavy chain isoform 5A	Kif5c;Kif5b;Kif5a
0	0	0	0	0	0	0	0	1	1	1	1.7	1.7	1.7	46.83	0.047619	0.42459	0	1	Q80YG3	Q80YG3	Kelch domain-containing protein 1	Klhdc1
0	0	0	0	0	0	0	428960	1	1	1	4	4	4	67.047	0.047452	0.42331	4487900	1	A0A1B0GQV2;Q8JZP3	A0A1B0GQV2;Q8JZP3	Kelch-like protein 2	Klhl2
0	0	0	0	0	0	0	152250	9	1	1	12.8	2.1	2.1	47.754	0.041833	0.47795	2264500	4	CON__P08730-1;P08730;P08730-2	CON__P08730-1;P08730;P08730-2	Keratin, type I cytoskeletal 13	Krt13
0	0	419630	0	0	0	301740	1673500	9	2	2	18.5	4.5	4.5	44.091	0	1.789	4776800	4	CON__P08727;CON__P19001;P19001;CON__P05784;P05784	CON__P08727;CON__P19001;P19001	Keratin, type I cytoskeletal 19	Krt19
0	0	0	0	0	0	0	6894900	1	1	1	1.7	1.7	1.7	51.117	0	76.065	35957000	4	Q3TRJ4	Q3TRJ4	Keratin, type I cytoskeletal 26	Krt26
0	0	0	0	0	0	0	38642000	2	1	1	3.5	1.9	1.9	50.346	0	36.298	241750000	25	A6BLY7	A6BLY7	Keratin, type I cytoskeletal 28	Krt28
0	0	0	0	0	0	107020	0	10	1	1	14.5	1.8	1.8	59.74	0	1.6638	3445600	3	CON__Q8BGZ7;Q8BGZ7	CON__Q8BGZ7;Q8BGZ7	Keratin, type II cytoskeletal 75	Krt75
14878000	0	0	76404000	26074000	29977000	12313000	15372000	9	3	3	12.1	4.4	4.4	62.844	0	37.934	196560000	18	Q3UV17;CON__Q7RTS7;CON__Q3SY84;Q99M73;CON__H-INV:HIT000292931	Q3UV17	Keratin, type II cytoskeletal 2 oral	Krt76
0	0	0	0	0	0	0	14563000	1	1	1	1.4	1.4	1.4	56.682	0	19.336	43682000	3	CON__Q9NSB4;Q99M74	CON__Q9NSB4;Q99M74	Keratin, type II cuticular Hb2	Krt82
0	0	0	0	0	0	45081	0	1	1	1	1	1	1	137.68	0.048214	0.42851	57379	1	Q61595-2;Q61595-12;Q61595-16;Q61595-3;Q61595-14;Q61595-6;Q61595-4;Q61595-9;Q61595-8;Q61595-13;Q61595-5;Q61595-15;Q61595-10;Q61595-7;Q61595-11;Q61595	Q61595-2;Q61595-12;Q61595-16;Q61595-3;Q61595-14;Q61595-6;Q61595-4;Q61595-9;Q61595-8;Q61595-13;Q61595-5;Q61595-15;Q61595-10;Q61595-7;Q61595-11;Q61595	Kinectin	Ktn1
0	0	0	0	0	0	11537000	0	1	1	1	1	1	1	119.57	0.0041152	1.6543	72964000	2	D3YU22;Q3UH68-3;Q3UH68	D3YU22;Q3UH68-3;Q3UH68	LIM and calponin homology domains-containing protein 1	Limch1
0	0	0	0	0	0	0	176070	1	1	1	7.1	7.1	7.1	17.964	0.046763	0.43531	742020	1	Q3TSN5;Q6P566	Q3TSN5;Q6P566	Protein limb expression 1 homolog	Lix1
0	0	0	0	206070	0	0	0	1	1	1	4	4	4	37.022	0.014205	0.8599	150270	1	A0A087WSF5;G5E8E1;A0A087WNU6	A0A087WSF5;G5E8E1;A0A087WNU6		Lrrfip1
0	309930	0	0	0	0	0	0	3	3	3	13.6	13.6	13.6	32.646	0	1.8924	1820500	4	E9Q715;Q05CX5;Q7TNC4-2;Q7TNC4-3;Q7TNC4-4;Q7TNC4;D3Z765;A0A0R4J047;Q9CYI4-2;Q9CYI4	E9Q715;Q05CX5;Q7TNC4-2;Q7TNC4-3;Q7TNC4-4;Q7TNC4;D3Z765;A0A0R4J047;Q9CYI4-2;Q9CYI4	Putative RNA-binding protein Luc7-like 2;Putative RNA-binding protein Luc7-like 1	Luc7l2;Luc7l
0	0	0	0	0	0	0	77827	1	1	1	2.8	2.8	2.8	51.45	0.03838	0.52418	895970	0	Q5SUF2;Q5SUF2-3;Q5SUF2-2	Q5SUF2;Q5SUF2-3;Q5SUF2-2	Luc7-like protein 3	Luc7l3
0	0	0	0	0	0	0	97576	1	1	1	18.7	18.7	18.7	14.599	0.042389	0.46892	586360	1	P35460	P35460	Lymphocyte antigen 6F	Ly6f
0	0	0	0	0	0	0	2123900	1	1	1	12.4	12.4	12.4	11.088	1	-2	21104000	1	E9PX24;Q3UN90	E9PX24;Q3UN90	LYR motif-containing protein 9	Lyrm9
0	0	0	0	0	0	0	235150	1	1	1	8.1	8.1	8.1	16.794	0.0033003	1.1255	1979700	4	P17897	P17897	Lysozyme C-1	Lyz1
0	0	0	0	0	0	9080600	0	1	1	1	1.2	1.2	1.2	123.36	0.018717	0.78727	24721000	1	A6PWP8;A2AGQ3;E9QN47;A2AGQ6;A2AGQ5;A2AGR0;A2AGQ9;A2AGQ7;A2AGQ8;A2AGQ2;A0A0R4J1F4;A2AGQ4;A2AGR1;Q80U28-9;Q80U28-14;Q80U28-12;Q80U28-11;Q80U28;Q80U28-10;Q80U28-4;Q80U28-5;Q80U28-8;Q80U28-2;Q80U28-7;Q80U28-3;Q80U28-13;Q80U28-6;Q80U28-15	A6PWP8;A2AGQ3;E9QN47;A2AGQ6;A2AGQ5;A2AGR0;A2AGQ9;A2AGQ7;A2AGQ8;A2AGQ2;A0A0R4J1F4;A2AGQ4;A2AGR1;Q80U28-9;Q80U28-14;Q80U28-12;Q80U28-11;Q80U28;Q80U28-10;Q80U28-4;Q80U28-5;Q80U28-8;Q80U28-2;Q80U28-7;Q80U28-3;Q80U28-13;Q80U28-6;Q80U28-15	MAP kinase-activating death domain protein	Madd
5115000	2448100	3308600	1802500	2389700	2671500	4377200	3372200	26	25	25	12.9	12.5	12.5	325.88	0	24.858	28908000	48	A2ARP8;Q9QYR6;Q9QYR6-2	A2ARP8;Q9QYR6;Q9QYR6-2	Microtubule-associated protein 1A;MAP1A heavy chain;MAP1 light chain LC2	Map1a
14665000	8159000	8147800	5581800	12414000	8920300	10220000	8760800	43	43	42	28.6	28.6	28.2	270.25	0	158.97	75860000	108	P14873	P14873	Microtubule-associated protein 1B;MAP1B heavy chain;MAP1 light chain LC1	Map1b
0	0	0	0	0	0	0	651600	1	1	1	11.6	11.6	11.6	14.272	0.037422	0.49991	2597100	1	Q91VR7	Q91VR7	Microtubule-associated proteins 1A/1B light chain 3A	Map1lc3a
76778000	56684000	60338000	35019000	48635000	36788000	86776000	55707000	65	65	58	48.6	48.6	43.4	199.13	0	323.31	492930000	357	P20357;G3UZK9;G3UZE9;F7ALC8;Q80X35;Q80ZL4;Q3TLQ0;G3UZV6;G3UWW1;E9Q8Y2	P20357	Microtubule-associated protein 2	Map2
3576500	3478200	3254900	1999100	2598400	2658300	4607200	4164000	20	20	20	35.5	35.5	35.5	96.449	0	27.759	28989000	59	Q7TSJ2;A0A140LIT9;D3Z6W1;Q7TSJ2-2;Q7TSJ2-3	Q7TSJ2;A0A140LIT9;D3Z6W1;Q7TSJ2-2	Microtubule-associated protein 6	Map6
0	0	0	0	0	0	0	579510	3	3	3	9.5	9.5	9.5	40.891	0	1.8514	2195600	4	B1AQW2;A0A0A0MQC7;A2A5Y6;P10637-6;P10637-5;P10637-2;P10637;P10637-4;P10637-3	B1AQW2;A0A0A0MQC7;A2A5Y6;P10637-6;P10637-5;P10637-2;P10637;P10637-4;P10637-3	Microtubule-associated protein;Microtubule-associated protein tau	Mapt
338910000	156900000	0	29214000	107010000	577420000	0	145300000	1	1	1	3.1	3.1	3.1	61.197	0.014837	0.95307	1693200000	9	D3YVY0	D3YVY0		March1
0	338270	333690	0	0	0	246650	0	3	3	3	15.5	15.5	15.5	29.661	0.0039841	1.5475	1526300	5	P26645	P26645	Myristoylated alanine-rich C-kinase substrate	Marcks
0	0	0	0	0	0	1439400	0	1	1	1	2.8	2.8	2.8	48.476	0.036638	0.52885	2953100	2	Q8C525	Q8C525	Protein MB21D2	Mb21d2
29495000	135950000	163730000	167990000	21754000	38624000	135290000	188710000	11	11	2	43.5	43.5	8.8	20.829	0	323.31	1005800000	164	F6VME3;F6RT34;P04370-5;P04370-10;P04370-4;F6RWW8;F6TYB7;P04370-14;P04370-8;P04370-13;P04370-6;P04370-11;P04370;P04370-2	F6VME3;F6RT34;P04370-5;P04370-10;P04370-4;F6RWW8;F6TYB7;P04370-14;P04370-8;P04370-13;P04370-6;P04370-11;P04370	Myelin basic protein	Mbp
0	0	0	0	0	0	0	181000	10	1	1	51.6	8.9	8.9	17.109	1	-2	775150	1	F6ZIA4;F7A0B0;P04370-7;P04370-9	F6ZIA4;F7A0B0;P04370-7;P04370-9	Myelin basic protein	Mbp
473460	487060	443580	364300	420470	472900	471190	591420	7	7	7	12	12	12	79.343	0	4.5485	3843800	11	Q99MR8;A0A0G2JF64;A0A0G2JFQ5	Q99MR8	Methylcrotonoyl-CoA carboxylase subunit alpha, mitochondrial	Mccc1
0	0	0	0	0	0	0	68815	1	1	1	1.5	1.5	1.5	95.416	0.049658	0.40865	83325	0	G3UW74;E9QP84;Q6PGF3	G3UW74;E9QP84;Q6PGF3	Mediator of RNA polymerase II transcription subunit 16	Med16
0	0	0	0	0	0	75911	0	1	1	1	7.5	7.5	7.5	22.358	1	-2	96621	0	A0A1L1SQB3;Q8VCD5	A0A1L1SQB3;Q8VCD5	Mediator of RNA polymerase II transcription subunit 17	Med17
0	0	0	0	0	0	0	856020	1	1	1	1.4	1.4	1.4	113.9	0.048495	0.39774	4460500	0	A0A140T8S0;Q6DIB5	A0A140T8S0;Q6DIB5	Multiple epidermal growth factor-like domains protein 10	Megf10
0	0	0	0	0	0	106400	0	1	1	1	9.2	9.2	9.2	16.958	0	12.51	2104000	2	Q9CPU4	Q9CPU4	Microsomal glutathione S-transferase 3	Mgst3
0	0	0	0	0	0	0	0	1	1	1	2.1	2.1	2.1	42.875	0.04932	0.40583	0	1	P00536	P00536	Proto-oncogene serine/threonine-protein kinase mos	Mos
0	0	0	0	151920	0	0	0	1	1	1	5.6	5.6	5.6	18.049	0.022167	0.688	251470	1	D3YWI4;E9Q1I6;F8WHT5;G3UVW1;P19258	D3YWI4;E9Q1I6;F8WHT5;G3UVW1;P19258	Protein Mpv17	Mpv17
0	0	0	0	0	0	0	153080	1	1	1	14.9	14.9	14.9	7.7662	0.037037	0.49808	1095500	2	P03930	P03930	ATP synthase protein 8	Mtatp8
0	0	0	0	0	0	0	241250	2	2	2	13.2	13.2	13.2	25.976	0.0034722	1.2128	2014400	2	P00405	P00405	Cytochrome c oxidase subunit 2	Mtco2
0	0	216410	201960	0	317510	490340	245990	6	6	6	7.9	7.9	7.9	105.73	0	4.2089	2461300	8	Q3V3R1	Q3V3R1	Monofunctional C1-tetrahydrofolate synthase, mitochondrial	Mthfd1l
0	1095700	935180	642610	0	1156100	1133900	1133500	7	7	7	13.1	13.1	13.1	75.54	0	3.6206	7239100	11	I7HJQ9;Q9Z2C4;F6T9H9;Q8CIU6;Q8CIU3;Q8CIU5;I7HPV7	I7HJQ9;Q9Z2C4;F6T9H9	Myotubularin-related protein 1	Mtmr1
6159400	7803900	6281100	3509400	4845000	7078100	7563200	9640000	39	39	30	25.2	25.2	20.2	232.47	0	67.372	57768000	102	Q5SV64;Q3UH59;Q61879;A0A140LI60;Q8BXF2;E9Q264;B1AR69;G3UW82;Q91Z83;P13542;Q02566;Q5SX39;P13541;A2AQP0;Q5SX40	Q5SV64;Q3UH59;Q61879	Myosin-10	Myh10
0	940710	856150	479820	0	721570	799260	981030	13	8	5	8.2	5.1	3.2	226.37	0	7.4093	5876900	17	Q8VDD5;A0A2R8W6V7	Q8VDD5	Myosin-9	Myh9
1473300	1133100	1687400	1360200	1217500	391620	1078800	930370	5	5	5	34.9	34.9	34.9	19.895	0	11.42	9929000	10	Q6ZWQ9;Q3THE2;D3YV37;Q9CQ19;D3Z249	Q6ZWQ9;Q3THE2;D3YV37;Q9CQ19	Myosin regulatory light chain 12B;Myosin regulatory light polypeptide 9	Myl12a;Myl12b;Myl9
2186100	0	0	0	2218800	0	0	0	4	4	3	23.7	23.7	15.1	17.005	0	21.257	6482900	6	A0A1W2P6F6;A0A1W2P7Q9;Q60605-2;Q60605;A0A1W2P6G5	A0A1W2P6F6;A0A1W2P7Q9;Q60605-2;Q60605;A0A1W2P6G5	Myosin light polypeptide 6	Myl6
0	0	92315	0	0	0	0	0	2	1	1	12.6	6.3	6.3	22.749	0.047703	0.42519	317590	1	Q8CI43	Q8CI43	Myosin light chain 6B	Myl6b
0	0	0	0	0	0	82675	0	1	1	1	2.2	2.2	2.2	57.53	0.04797	0.44176	444020	1	F6Y6G7;A0A1Y7VNG3;I7HPW8	F6Y6G7;A0A1Y7VNG3;I7HPW8		Myo15b
16279000	16329000	14397000	7046200	16121000	17771000	15926000	18094000	46	46	46	28.6	28.6	28.6	230.99	0	159.92	130350000	174	K3W4L0;B2RRE2;E9QAX2;Q9JMH9-4;Q9JMH9-1;Q9JMH9;Q9JMH9-6;E9Q405;A0A1C7ZN10;Q9JMH9-5;Q9JMH9-7;Q9JMH9-2;E9QA74	K3W4L0;B2RRE2;E9QAX2;Q9JMH9-4;Q9JMH9-1;Q9JMH9;Q9JMH9-6;E9Q405;A0A1C7ZN10;Q9JMH9-5;Q9JMH9-7;Q9JMH9-2;E9QA74	Unconventional myosin-XVIIIa	Myo18a
0	208130	0	0	0	0	0	0	2	2	2	1.4	1.4	1.4	210.54	0.0033113	1.1363	455590	1	G5E8G6;G3X9Y9;P21271;P21271-3;D3YZ62;D3Z4J3;Q99104	G5E8G6;G3X9Y9;P21271;P21271-3;D3YZ62;D3Z4J3;Q99104	Unconventional myosin-Vb;Unconventional myosin-Va	Myo5b;Myo5a
0	0	0	0	0	0	29312	0	1	1	1	0.6	0.6	0.6	161.78	0.041199	0.45788	1829900	1	A2ABU4	A2ABU4	Myomesin-3	Myom3
0	0	0	0	0	0	0	505040	1	1	1	0.9	0.9	0.9	223.58	0.018182	0.74942	3865000	5	F6VTL9;A0A0G2JFQ4;E9Q9L6;Q6ZQA0;Q6ZQA0-2	F6VTL9;A0A0G2JFQ4;E9Q9L6;Q6ZQA0;Q6ZQA0-2	Neurobeachin-like protein 2	Nbeal2
0	0	0	0	154730	0	0	0	1	1	1	2	2	2	67.305	0.01626	0.80324	130830	1	A0A0A6YWU2;E9Q589;A0A0A6YY47;E9QB01;A0A0A6YY91;P13595-4;P13595-3;P13595-2;P13595	A0A0A6YWU2;E9Q589;A0A0A6YY47;E9QB01;A0A0A6YY91;P13595-4;P13595-3;P13595-2;P13595	Neural cell adhesion molecule 1	Ncam1
0	1963400	1865200	1723600	0	644450	1305200	1288900	7	7	7	13.4	13.4	13.4	76.722	0	27.182	10203000	16	P09405	P09405	Nucleolin	Ncl
0	0	0	0	0	0	0	191640	1	1	1	1.6	1.6	1.6	99.954	0.037736	0.50267	1958000	1	A0A1W2P7C1;P70365-4;P70365-2;P70365-3;P70365	A0A1W2P7C1;P70365-4;P70365-2;P70365-3;P70365	Nuclear receptor coactivator 1	Ncoa1
0	710040	597100	0	0	0	679620	636590	2	2	2	44.9	44.9	44.9	5.8765	0	2.0156	4456800	5	A0A0N4SVQ1;Q62425	A0A0N4SVQ1;Q62425	Cytochrome c oxidase subunit NDUFA4	Ndufa4
0	0	185850	0	0	0	0	0	1	1	1	12.7	12.7	12.7	13.437	0.020356	0.718	437640	1	A0A338P7A0;E9QPX3;Q9CXZ1	A0A338P7A0;E9QPX3;Q9CXZ1	NADH dehydrogenase [ubiquinone] iron-sulfur protein 4, mitochondrial	Ndufs4
0	0	0	0	0	0	0	67679	1	1	1	22.4	22.4	22.4	10.908	0.016667	0.82568	698510	2	A0A1Y7VKP8;A0A1Y7VM38;P52503	A0A1Y7VKP8;A0A1Y7VM38;P52503	NADH dehydrogenase [ubiquinone] iron-sulfur protein 6, mitochondrial	Ndufs6
35161	0	0	0	0	0	0	0	1	1	1	4	4	4	24.683	0.042969	0.47526	35161	1	Q9DC70	Q9DC70	NADH dehydrogenase [ubiquinone] iron-sulfur protein 7, mitochondrial	Ndufs7
0	0	0	0	0	0	0	555350	1	1	1	3.6	3.6	3.6	51.62	1	-2	2459100	1	A0A1B0GXL1;B7ZCI3;B7ZCI2;Q0II04	A0A1B0GXL1;B7ZCI3;B7ZCI2;Q0II04	Nebulette	Nebl
264400	0	0	0	459500	0	0	0	3	3	3	3.8	3.8	3.8	101.17	0	2.0154	466290	3	A0A087WNW2;E9Q171;A0A087WR56;E9PW06;A0A087WPX3;Q810U3	A0A087WNW2;E9Q171;A0A087WR56;E9PW06;A0A087WPX3;Q810U3	Neurofascin	Nfasc
64447	0	0	0	0	0	0	0	1	1	1	7.3	7.3	7.3	28.271	0.031818	0.59399	64447	1	F6SWQ9;E9QK62;Q8CHT1-2;Q8CHT1	F6SWQ9;E9QK62;Q8CHT1-2;Q8CHT1	Ephexin-1	Ngef
0	0	0	0	0	0	0	46115	1	1	1	6.8	6.8	6.8	24.567	1	-2	737290	0	Q9D1X0	Q9D1X0	Nucleolar protein 3	Nol3
0	0	0	0	0	0	1022300	0	1	1	1	2.6	2.6	2.6	96.774	0.023419	0.62517	8659000	3	A0A1Y7VJG5;A0A1Y7VM06;F8VQB2;Q9QZQ0	A0A1Y7VJG5;A0A1Y7VM06;F8VQB2;Q9QZQ0	Neuronal PAS domain-containing protein 3	Npas3
4030700	3797000	2976100	1795900	3151900	5528000	2997900	3534600	15	15	15	23.8	23.8	23.8	82.613	0	19.699	27498000	41	P46460;G3UX86;G3UX98	P46460	Vesicle-fusing ATPase	Nsf
0	0	0	0	0	0	0	2613600	1	1	1	1.9	1.9	1.9	79.12	0.03118	0.57447	3164600	1	A0A0J9YV71;E9QPI2;Q14AW5-4;Q14AW5-2;Q14AW5	A0A0J9YV71;E9QPI2;Q14AW5-4;Q14AW5-2;Q14AW5	Putative methyltransferase NSUN7	Nsun7
0	0	0	0	0	373510	0	0	2	2	2	6.6	6.6	6.6	70.674	0.018135	0.74665	1360300	1	Q8BZN4;Q8BZN4-2	Q8BZN4;Q8BZN4-2	NUAK family SNF1-like kinase 2	Nuak2
0	0	0	0	0	0	0	16724	1	1	1	7.1	7.1	7.1	22.338	0.041276	0.4579	65912	0	A0A286YE01;Q8JZU0	A0A286YE01;Q8JZU0	Nucleoside diphosphate-linked moiety X motif 13	Nudt13
0	16665000	0	0	0	0	0	0	2	2	2	3.5	3.5	3.5	99.657	0	2.0161	53845000	9	A0A1B0GT61;A0A1B0GSW3;E9Q7G0	A0A1B0GT61;A0A1B0GSW3;E9Q7G0		Numa1
7387200	0	0	0	2077300	0	0	15658000	1	1	1	0.6	0.6	0.6	212.98	0	27.737	117550000	14	Q80U93	Q80U93	Nuclear pore complex protein Nup214	Nup214
0	0	0	0	0	0	664090	0	1	1	1	2.2	2.2	2.2	70.524	0.031461	0.58832	2747200	1	A0A0R4J1I8;D3Z3N9;A0A0R4J1X0;A0A0R4J0T9	A0A0R4J1I8;D3Z3N9;A0A0R4J1X0;A0A0R4J0T9		Nyap2
0	0	0	0	0	0	0	133660	1	1	1	2.9	2.9	2.9	51.027	0.042471	0.47087	1043500	0	A3KGE4;G3X9Q7;Q8R357;O88998-4;O88998-2;O88998-3;O88998	A3KGE4;G3X9Q7;Q8R357;O88998-4;O88998-2;O88998-3;O88998	Noelin	Olfm1
0	0	0	0	0	0	0	18433000	1	1	1	3.1	3.1	3.1	36.648	0.037975	0.50687	95341000	5	E9PVW2;A0A2I3BRV7	E9PVW2;A0A2I3BRV7	Olfactory receptor	Olfr872
0	0	0	0	105110	0	0	0	1	1	1	1.8	1.8	1.8	91.549	0.022222	0.68853	79262	1	E9Q484;Q8K010	E9Q484;Q8K010	5-oxoprolinase	Oplah
0	0	0	0	0	0	57613	0	1	1	1	4.1	4.1	4.1	33.738	1	-2	183360	0	Q6IE21	Q6IE21	OTU domain-containing protein 6A	Otud6a
0	0	0	0	1089600	0	0	0	1	1	1	5.9	5.9	5.9	57.058	0.021845	0.6772	186800	1	P09103	P09103	Protein disulfide-isomerase	P4hb
0	0	758650	586440	0	0	565310	434260	4	4	3	7.4	7.4	6	70.67	0	1.9793	3586100	6	P29341;A0A2I3BR37;Q9D4E6;V9GXG3;Q8C7D3;Q91YZ8;A3KFU5;A3KFU8;Q6PHQ9	P29341;A0A2I3BR37;Q9D4E6	Polyadenylate-binding protein 1;Polyadenylate-binding protein	Pabpc1;Pabpc6
0	0	0	0	0	0	0	6788700	2	1	1	4.8	3.3	3.3	69.06	0.023753	0.63676	8220100	1	Q62029	Q62029	Polyadenylate-binding protein	Pabpc2
0	0	0	0	0	0	0	820180	1	1	1	12.4	12.4	12.4	11.423	1	-2	1319400	0	Q5SW16;P63005-2;P63005	Q5SW16;P63005-2;P63005	Platelet-activating factor acetylhydrolase IB subunit alpha	Pafah1b1
0	0	0	0	0	0	0	2913000	1	1	1	1.4	1.4	1.4	137.36	0.042831	0.45567	3527200	1	Q2EMV9-2;Q2EMV9	Q2EMV9-2;Q2EMV9	Poly [ADP-ribose] polymerase 14	Parp14
0	0	0	0	0	0	0	0	1	1	1	10.4	10.4	10.4	13.81	0.031532	0.58859	0	1	A0A0A6YW85;Q91Y00	A0A0A6YW85;Q91Y00		Pcdhb2
0	0	0	0	0	0	0	0	1	1	1	2.4	2.4	2.4	58.402	1	-2	0	1	Q52KQ3;Q91XZ8	Q52KQ3;Q91XZ8		Pcdhb22
0	0	0	0	0	0	0	3458300	1	1	1	0.9	0.9	0.9	164.44	0.022388	0.69291	15720000	1	F6UFZ5;G3X9Z4	F6UFZ5;G3X9Z4		Pcf11
0	0	0	0	0	0	0	173150	1	1	1	3.3	3.3	3.3	43.231	0.037267	0.49967	1110300	2	P35486	P35486	Pyruvate dehydrogenase E1 component subunit alpha, somatic form, mitochondrial	Pdha1
162200	0	0	0	0	0	0	0	2	2	2	7.5	7.5	7.5	38.937	0.0090361	0.96716	196760	2	Q9D051	Q9D051	Pyruvate dehydrogenase E1 component subunit beta, mitochondrial	Pdhb
0	0	0	0	0	0	0	212720	1	1	1	12.7	12.7	12.7	11.776	0.018617	0.78232	1019500	3	D3YWS3;Q9JJV2-3;Q9JJV2;Q9JJV2-2	D3YWS3;Q9JJV2-3;Q9JJV2;Q9JJV2-2	Profilin;Profilin-2	Pfn2
238170	0	0	0	553160	0	0	0	3	3	3	15.1	15.1	15.1	29.82	0	2.2233	464060	3	P67778;Q5SQG5	P67778	Prohibitin	Phb
0	1089700	680650	413590	0	0	448710	423390	5	5	5	23.7	23.7	23.7	33.296	0	5.065	4275600	7	O35129;F6QPR1;F6Q8V7	O35129;F6QPR1	Prohibitin-2	Phb2
0	0	0	0	0	0	0	319270	1	1	1	5.3	5.3	5.3	20.815	1	-2	4576700	1	F6TL54;A2AHG3;D3Z764;E9PV92;A2AHG4;E9QKW9;A2AHG2;Q6ZPK0-5;Q6ZPK0-7;Q6ZPK0-4;Q6ZPK0-9;Q6ZPK0-2;Q6ZPK0-6;Q6ZPK0-8;Q6ZPK0-3;Q6ZPK0	F6TL54;A2AHG3;D3Z764;E9PV92;A2AHG4;E9QKW9;A2AHG2;Q6ZPK0-5;Q6ZPK0-7;Q6ZPK0-4;Q6ZPK0-9;Q6ZPK0-2;Q6ZPK0-6;Q6ZPK0-8;Q6ZPK0-3;Q6ZPK0	PHD finger protein 21A	Phf21a
0	0	0	0	0	0	0	0	1	1	1	2.8	2.8	2.8	36.366	1	-2	0	1	E9QAG2;Q9D4J7-2;Q9D4J7	E9QAG2;Q9D4J7-2;Q9D4J7	PHD finger protein 6	Phf6
433300	0	0	0	0	0	0	0	5	5	5	3.3	3.3	3.3	231.35	0	4.2706	1492300	5	A0A140T8I9;E9Q3L2;A0A338P7D3;A0A338P6F9	A0A140T8I9;E9Q3L2		Pi4ka
0	0	0	0	0	0	0	1437800	1	1	1	4.3	4.3	4.3	23.613	0.047697	0.38987	5095200	1	A0A087WQR4	A0A087WQR4		Pik3r4
0	0	0	0	0	51540	0	0	1	1	1	3.7	3.7	3.7	46.151	1	-2	36017	0	O70172	O70172	Phosphatidylinositol 5-phosphate 4-kinase type-2 alpha	Pip4k2a
0	0	0	0	0	0	0	155640	1	1	1	3.4	3.4	3.4	47.318	0.022059	0.68189	742300	1	Q80XI4	Q80XI4	Phosphatidylinositol 5-phosphate 4-kinase type-2 beta	Pip4k2b
0	0	0	0	0	0	0	120480	1	1	1	1.5	1.5	1.5	75.515	0.048387	0.43051	512050	2	F8WHW6;O70161-2;O70161-3;O70161	F8WHW6;O70161-2;O70161-3;O70161	Phosphatidylinositol 4-phosphate 5-kinase type-1 gamma	Pip5k1c
125110	0	0	0	348790	0	0	0	3	3	3	18.1	18.1	18.1	25.148	0.0038462	1.4041	756700	4	A0A1L1SU37;P52480-2;P52480;A0A1L1ST52;A0A1L1SUV0;A0A1L1SSN6;A0A1L1STV8;A0A1L1SQV8;A0A1L1SVH2	A0A1L1SU37;P52480-2;P52480;A0A1L1ST52;A0A1L1SUV0;A0A1L1SSN6;A0A1L1STV8;A0A1L1SQV8	Pyruvate kinase PKM	Pkm
0	0	0	0	0	0	0	265580	1	1	1	1.6	1.6	1.6	88.103	0.037578	0.50135	1015800	0	Q9CQ73	Q9CQ73		Pkp2
0	2682300	2401300	1092500	0	4759100	2637500	2422100	13	13	13	22.4	22.4	22.4	90.807	0	11.579	17658000	24	P20918;CON__P06868	P20918	Plasminogen;Plasmin heavy chain A;Activation peptide;Angiostatin;Plasmin heavy chain A, short form;Plasmin light chain B	Plg
11426000	4507500	5764700	2048700	15675000	3811000	4819800	2369100	5	5	5	20.2	20.2	20.2	30.077	0	19.371	45084000	30	P60202;P60202-2	P60202;P60202-2	Myelin proteolipid protein	Plp1
0	0	0	0	0	0	0	187320	1	1	1	0.5	0.5	0.5	211.53	0.033259	0.56279	773780	1	P70207	P70207	Plexin-A2	Plxna2
0	9694800	7844400	6237300	0	1371700	6060800	5574700	3	3	3	21.8	21.8	21.8	18.516	0	132.99	43580000	21	P56942	P56942	Pro-MCH;Neuropeptide-glycine-glutamic acid;Neuropeptide-glutamic acid-isoleucine;Melanin-concentrating hormone	Pmch
0	0	0	0	0	102790	0	0	1	1	1	1.8	1.8	1.8	82.504	0.041746	0.46363	71833	0	Q3TUQ5;O35691	Q3TUQ5;O35691	Pinin	Pnn
0	0	0	0	0	0	0	1416600	1	1	1	1.4	1.4	1.4	143.24	1	-2	2174100	1	F7CYX4;B8QI34;Q8BSS9	F7CYX4;B8QI34;Q8BSS9	Liprin-alpha-2	Ppfia2
0	0	0	0	0	0	0	7013500	1	1	1	1.7	1.7	1.7	100.45	1	-2	10870000	1	A0A087WPJ3;A0A087WPM2;B8QI36	A0A087WPJ3;A0A087WPM2;B8QI36		Ppfia4
0	611280	686330	460190	0	474870	638620	642450	8	5	5	27.2	19.1	19.1	42.432	0	4.4074	4532700	8	P49443;Q9EQE2;A0A1Y7VJZ4	P49443;Q9EQE2	Protein phosphatase 1A	Ppm1a
4277500	5384200	5630500	4520100	4702300	2810000	3834800	5580900	13	13	10	34.4	34.4	27.9	52.11	0	14.341	39700000	44	Q99NF7;P36993-4;P36993;P36993-3;P36993-5	Q99NF7;P36993-4;P36993;P36993-3;P36993-5	Protein phosphatase 1B	Ppm1b
0	0	0	0	0	0	0	268090	1	1	1	22.8	22.8	22.8	11.104	0.046957	0.41962	791580	1	A0A0N4SVZ5;Q8BXN7	A0A0N4SVZ5;Q8BXN7	Protein phosphatase 1K, mitochondrial	Ppm1k
0	0	0	0	5170200	0	0	0	1	1	1	1	1	1	124.93	0.048059	0.4426	639090	1	Q6A025	Q6A025	Protein phosphatase 1 regulatory subunit 26	Ppp1r26
0	0	0	0	0	0	0	10468000	1	1	1	1.8	1.8	1.8	121.43	0.047285	0.42249	102700000	2	Q99MR9	Q99MR9	Protein phosphatase 1 regulatory subunit 3A	Ppp1r3a
0	0	0	0	90804	0	0	0	1	1	1	3.6	3.6	3.6	35.608	0.0375	0.50116	126550	1	P63330;P62715	P63330;P62715	Serine/threonine-protein phosphatase 2A catalytic subunit alpha isoform;Serine/threonine-protein phosphatase 2A catalytic subunit beta isoform	Ppp2ca;Ppp2cb
0	0	0	0	0	0	0	77589	1	1	1	1.7	1.7	1.7	65.322	0.041353	0.45826	810790	2	Q76MZ3	Q76MZ3	Serine/threonine-protein phosphatase 2A 65 kDa regulatory subunit A alpha isoform	Ppp2r1a
771270	0	0	0	1050500	0	0	0	5	5	5	10	10	10	57.614	0	3.3905	2543600	6	P63328-2;P63328;E9Q6P2;G3X8U7;E0CZ78;P48453-2;P48453;A0A2I3BPC5;P48455	P63328-2;P63328;E9Q6P2;G3X8U7;E0CZ78;P48453-2;P48453	Serine/threonine-protein phosphatase 2B catalytic subunit alpha isoform;Serine/threonine-protein phosphatase;Serine/threonine-protein phosphatase 2B catalytic subunit beta isoform	Ppp3ca;Ppp3cb
0	0	0	0	0	0	0	1525800	1	1	1	10.1	10.1	10.1	20.659	0.036797	0.53086	5269400	1	Q63811	Q63811	Calcineurin subunit B type 2	Ppp3r2
0	0	0	0	0	0	0	80899	1	1	1	5.9	5.9	5.9	18.87	0.038544	0.52636	963460	3	B1AXW5;B1AXW6;P35700	B1AXW5;B1AXW6;P35700	Peroxiredoxin-1	Prdx1
0	0	0	0	0	0	0	115330	1	1	1	6.6	6.6	6.6	17.253	0.047187	0.43714	696780	1	G3UZJ4;H3BJQ7;P99029-2;P99029	G3UZJ4;H3BJQ7;P99029-2;P99029	Peroxiredoxin-5, mitochondrial	Prdx5
0	0	0	0	0	0	0	0	1	1	1	2.2	2.2	2.2	58.408	0.048093	0.39404	0	1	P33610	P33610	DNA primase large subunit	Prim2
142770	0	0	0	0	0	0	0	4	1	1	9.4	1.9	1.9	76.851	0.016484	0.81282	142770	1	P20444;Q4VA93	P20444;Q4VA93	Protein kinase C alpha type;Protein kinase C	Prkca
1731000	1104400	1376100	1087800	1111100	1740000	1553100	1381600	9	8	6	20.7	17.5	13.2	76.893	0	19.605	11908000	17	P68404-2;P68404	P68404-2;P68404	Protein kinase C beta type	Prkcb
2837700	2369400	2863600	1372600	1004400	4289500	2793600	5136700	10	10	9	18.9	18.9	15.9	78.357	0	9.8708	24796000	30	P63318;Q2NKI4;A0A0N4SWF4;Q3TQ39	P63318;Q2NKI4	Protein kinase C gamma type;Protein kinase C	Prkcg
23856000	12624000	13016000	6966100	13762000	11000000	16266000	17943000	18	18	18	36.6	36.6	36.6	72.737	0	38.831	119800000	84	A0A0R4J049;Q8CIG8;F6QQQ6;A0A2I3BRG2;S4R295	A0A0R4J049;Q8CIG8	Protein arginine N-methyltransferase 5	Prmt5
0	0	285470	0	0	0	0	0	1	1	1	1.5	1.5	1.5	83.125	0.030303	0.61099	531890	1	P48437	P48437	Prospero homeobox protein 1	Prox1
0	0	0	984190	0	0	0	0	1	1	1	8.1	8.1	8.1	26.134	0.0038314	1.3986	1121800	2	Q9Z1R9	Q9Z1R9		Prss1
84949	0	0	0	0	0	0	0	1	1	1	2.7	2.7	2.7	52.866	0.029954	0.60311	84949	1	Q8BVQ9;P46471	Q8BVQ9;P46471	26S protease regulatory subunit 7	Psmc2
0	0	0	0	0	0	92858	0	1	1	1	3.2	3.2	3.2	38.751	0.018667	0.78617	420260	2	Q8K1K2;P62196	Q8K1K2;P62196	26S protease regulatory subunit 8	Psmc5
0	0	0	0	0	0	25040	0	1	1	1	1.3	1.3	1.3	105.73	0.016529	0.81824	74439	1	Q3TXS7	Q3TXS7	26S proteasome non-ATPase regulatory subunit 1	Psmd1
0	0	0	0	0	0	0	0	1	1	1	1.8	1.8	1.8	55.971	0.042254	0.4849	0	1	Q8BJY1	Q8BJY1	26S proteasome non-ATPase regulatory subunit 5	Psmd5
0	0	0	0	0	0	496700	0	1	1	1	6	6	6	42.341	1	-2	14880000	1	P54830-2;P54830	P54830-2;P54830	Tyrosine-protein phosphatase non-receptor type 5	Ptpn5
0	0	0	0	0	51859	0	0	1	1	1	2	2	2	82.092	0.046847	0.43628	36240	0	A0A1B0GRH2;A0A1B0GRT6;P49446-2;P49446	A0A1B0GRH2;A0A1B0GRT6;P49446-2;P49446	Receptor-type tyrosine-protein phosphatase epsilon	Ptpre
0	0	0	0	101750	0	0	0	1	1	1	6.2	6.2	6.2	54.028	0.01462	0.93159	131370	1	Q3UEB3-3;Q3UEB3-2;Q3UEB3	Q3UEB3-3;Q3UEB3-2;Q3UEB3	Poly(U)-binding-splicing factor PUF60	Puf60
2584900	1458700	1817000	1191800	1928200	1405800	2282000	1967600	5	5	5	27.1	27.1	27.1	34.883	0	11.406	15582000	20	P42669	P42669	Transcriptional activator protein Pur-alpha	Pura
1538500	1291400	1509500	1235600	0	1515700	1685500	1913600	5	5	5	34.3	34.3	34.3	33.901	0	20.383	12326000	16	O35295	O35295	Transcriptional activator protein Pur-beta	Purb
0	0	0	0	0	0	0	5891400	1	1	1	1.7	1.7	1.7	53.03	0.022113	0.68194	25222000	1	Q8R007-2;Q8R007	Q8R007-2;Q8R007	Nectin-4	Pvrl4
0	0	0	0	162650	0	0	0	1	1	1	8	8	8	22.187	0.04811	0.41052	117940	1	Q9D1G1	Q9D1G1	Ras-related protein Rab-1B	Rab1b
471060	0	0	0	527990	0	0	0	3	3	3	22.7	22.7	22.7	24.97	0	2.0002	1031400	3	P63011;D3YZP5;D3YWL1;D3YW33;P35276	P63011	Ras-related protein Rab-3A	Rab3a
0	0	0	0	151770	0	0	0	1	1	1	6.7	6.7	6.7	25.613	0.03681	0.49776	85804	1	A0A286YDR2;P62823	A0A286YDR2;P62823	Ras-related protein Rab-3C	Rab3c
0	0	0	0	0	0	0	698660	1	1	1	13.8	13.8	13.8	9.3244	0.022444	0.69662	5173300	5	A0A1L1SRS6;D3YV69;P61294;P35279-2;P35279;Q8BHD0	A0A1L1SRS6;D3YV69;P61294;P35279-2;P35279;Q8BHD0	Ras-related protein Rab-6B;Ras-related protein Rab-6A;Ras-related protein Rab-39A	Rab6a;Rab6b;Rab39a
0	0	0	0	0	3438500	0	0	1	1	1	1.8	1.8	1.8	62.344	1	-2	2488400	1	R4GML2;A2AU37	R4GML2;A2AU37	Double-strand-break repair protein rad21-like protein 1	Rad21l;Rad21l1
0	0	0	0	0	0	0	2536100	1	1	1	1.7	1.7	1.7	46.699	1	-2	7044500	1	A0A1D5RLR3;B2RUP0	A0A1D5RLR3;B2RUP0		Rbm34
312780	0	0	0	352100	0	0	0	3	3	3	10.1	10.1	10.1	47.05	0	2.1914	834050	5	E9Q8F0;Q8VH51-3;Q8VH51-2;Q8VH51;F7AA45;B7ZD63;B7ZD61	E9Q8F0;Q8VH51-3;Q8VH51-2;Q8VH51;F7AA45	RNA-binding protein 39	Rbm39
0	1085400	644400	1254900	0	0	780590	683370	3	3	3	9.5	9.5	9.5	42.178	0	2.8578	5305500	5	A0A2I3BRL8;Q91VM5;Q9WV02;A2AFI4;A2AFI3;Q9WV02-2;A0A2I3BQC0;S4R1F6	A0A2I3BRL8;Q91VM5;Q9WV02;A2AFI4;A2AFI3;Q9WV02-2	RNA binding motif protein, X-linked-like-1;RNA-binding motif protein, X chromosome;RNA-binding motif protein, X chromosome, N-terminally processed	Rbmxl1;Rbmx
43739	0	0	0	0	0	0	0	1	1	1	4.3	4.3	4.3	36.953	0.048527	0.41612	43739	0	Q8VIG1-2;Q8VIG1-3;Q8VIG1	Q8VIG1-2;Q8VIG1-3;Q8VIG1	RE1-silencing transcription factor	Rest
0	0	0	0	0	0	0	556210	1	1	1	4.4	4.4	4.4	37.865	0.020253	0.71203	9529600	5	Q8C4C4	Q8C4C4		Rgma
92026	0	0	0	0	0	0	0	1	1	1	6.7	6.7	6.7	20.704	0.042146	0.46746	92026	1	Q45FE1;Q45FE2;A0A0J9YTS6;A0A087WSJ9;A0A087WSH2;A0A087WPW1;F6WDS8;A0A087WQG6;Q80XD3;A0A0A6YW36;A0A087WNZ9;A0A087WRP8;A0A087WPC4;A0A087WPD1;O54829;Q9Z2H2	Q45FE1;Q45FE2;A0A0J9YTS6;A0A087WSJ9;A0A087WSH2;A0A087WPW1;F6WDS8;A0A087WQG6;Q80XD3;A0A0A6YW36;A0A087WNZ9;A0A087WRP8;A0A087WPC4;A0A087WPD1;O54829;Q9Z2H2	Regulator of G-protein signaling 7;Regulator of G-protein signaling 6	Rgs7;Rgs6
0	0	0	0	0	0	1067800	0	1	1	1	0.2	0.2	0.2	584.62	0.029613	0.59698	2563800	1	A0A171EBL2;E9Q555	A0A171EBL2;E9Q555	E3 ubiquitin-protein ligase RNF213	Rnf213
0	0	0	0	0	0	43876	0	1	1	1	12.1	12.1	12.1	13.125	0.046382	0.44948	73725	0	A0A0G2JG19;Q91ZQ5	A0A0G2JG19;Q91ZQ5	Retinoid isomerohydrolase	Rpe65
0	0	0	0	0	0	0	181090	1	1	1	2.2	2.2	2.2	75.488	0.042084	0.4834	291400	1	P47708	P47708	Rabphilin-3A	Rph3a
0	0	0	0	0	0	0	0	2	2	2	9.2	9.2	9.2	24.916	0	6.2853	0	2	P53026;Q5XJF6;D6RE43	P53026;Q5XJF6;D6RE43	60S ribosomal protein L10a;Ribosomal protein	Rpl10a
0	0	0	0	0	0	0	335940	1	1	1	5.5	5.5	5.5	17.804	0.04142	0.47664	1945800	2	P35979	P35979	60S ribosomal protein L12	Rpl12
861100	897220	2034600	1721400	681490	699910	2506500	2206600	4	4	4	19.9	19.9	19.9	24.305	0	9.986	14778000	16	P47963	P47963	60S ribosomal protein L13	Rpl13
0	0	0	0	0	0	349130	0	1	1	1	15.9	15.9	15.9	7.9826	0.042169	0.4849	478550	1	A0A1B0GQW6;A0A1B0GSF0;A0A1B0GSQ6;A0A1B0GTA1;A0A140T8K2;A0A1B0GS68;P19253	A0A1B0GQW6;A0A1B0GSF0;A0A1B0GSQ6;A0A1B0GTA1;A0A140T8K2;A0A1B0GS68;P19253	60S ribosomal protein L13a	Rpl13a
0	457550	651460	437970	0	628990	808380	598620	3	3	3	16.1	16.1	16.1	23.564	0	14.16	4092500	7	Q9CR57;A0A1L1SUF6	Q9CR57	60S ribosomal protein L14	Rpl14
0	0	428520	276720	0	0	542210	439520	2	2	2	11.3	11.3	11.3	24.146	0.0040486	1.5808	2791800	6	Q9CZM2;B8JKK2	Q9CZM2;B8JKK2	60S ribosomal protein L15;Ribosomal protein L15	Rpl15
1125200	633900	700710	0	613300	0	935410	1057700	4	4	4	27.7	27.7	27.7	17.958	0	2.6121	6315300	9	A0A1B0GSS8;A0A1B0GQU8;P35980;A0A1B0GSF7;A0A1B0GSA8;A0A1B0GRZ3	A0A1B0GSS8;A0A1B0GQU8;P35980;A0A1B0GSF7;A0A1B0GSA8	60S ribosomal protein L18	Rpl18
0	0	0	0	0	0	0	383100	1	1	1	14.3	14.3	14.3	8.0947	0.048739	0.40104	995340	1	A0A1D5RMC7;A0A1D5RM79;A0A1D5RLW5;A0A1D5RM85;P62717	A0A1D5RMC7;A0A1D5RM79;A0A1D5RLW5;A0A1D5RM85;P62717	60S ribosomal protein L18a	Rpl18a
1032700	516440	654650	493690	547800	467080	1110000	956480	2	2	2	13.4	13.4	13.4	23.247	0	4.39	5849800	8	A2A547;P84099	A2A547;P84099	Ribosomal protein L19;60S ribosomal protein L19	Rpl19
0	0	0	0	0	0	0	275740	1	1	1	9.4	9.4	9.4	18.579	0.0032787	1.1172	1241400	2	Q9CQM8;O09167	Q9CQM8;O09167	60S ribosomal protein L21	Rpl21
0	0	0	0	126060	0	0	0	1	1	1	7.1	7.1	7.1	14.865	0.047101	0.4367	254580	1	P62830	P62830	60S ribosomal protein L23	Rpl23
0	306310	764290	649830	0	0	1503300	0	3	3	3	19.7	19.7	19.7	17.779	0.0040161	1.566	5715600	5	Q8BP67;F6RSK3	Q8BP67	60S ribosomal protein L24	Rpl24
0	0	0	0	0	0	0	781540	1	1	1	7.8	7.8	7.8	12.217	0	2.2365	4006600	8	B1ARA3;P61255	B1ARA3;P61255	60S ribosomal protein L26	Rpl26
0	320860	339000	0	0	331910	486910	497390	2	2	2	12.5	12.5	12.5	15.798	0.018767	0.7896	2651300	3	P61358;A2A4Q0	P61358;A2A4Q0	60S ribosomal protein L27	Rpl27
0	0	0	0	0	0	0	327950	2	2	2	14.2	14.2	14.2	16.605	0.0092593	0.9964	1855400	2	P14115	P14115	60S ribosomal protein L27a	Rpl27a
0	0	0	1347900	0	0	1335400	0	3	3	3	23.4	23.4	23.4	15.733	0.0037175	1.306	7267100	3	P41105	P41105	60S ribosomal protein L28	Rpl28
0	0	399860	314770	0	414270	433640	677790	3	3	3	11.2	11.2	11.2	46.109	0	1.9908	3242700	7	P27659;A0A2R8VHN4;A0A087WNS0;A0A087WQK0	P27659	60S ribosomal protein L3	Rpl3
0	0	0	0	0	0	198890	0	1	1	1	17	17	17	10.457	0.018868	0.79491	584500	1	A0A2I3BQF4;P62889	A0A2I3BQF4;P62889	60S ribosomal protein L30	Rpl30
0	0	1005300	0	0	0	1212200	912580	3	3	3	26.4	26.4	26.4	14.463	0	2.0359	5884300	5	P62900;A0A0A6YX26;A0A0A6YXL3	P62900;A0A0A6YX26	60S ribosomal protein L31	Rpl31
0	0	0	0	0	0	124100	0	1	1	1	9.6	9.6	9.6	15.86	0.018088	0.7442	157960	1	P62911	P62911	60S ribosomal protein L32	Rpl32
0	0	0	0	0	0	0	1826100	1	1	1	8.1	8.1	8.1	14.552	0	1.6857	8474800	6	Q6ZWV7	Q6ZWV7	60S ribosomal protein L35	Rpl35
0	0	0	0	212950	0	0	0	1	1	1	8.2	8.2	8.2	12.554	0.041502	0.47664	145180	1	O55142	O55142	60S ribosomal protein L35a	Rpl35a
0	0	0	0	0	0	106480	0	1	1	1	11.4	11.4	11.4	12.254	0.037895	0.50666	312910	1	Q6ZWZ4	Q6ZWZ4	60S ribosomal protein L36	Rpl36
0	0	0	0	0	0	318320	0	1	1	1	8.5	8.5	8.5	12.455	0.046931	0.43632	1298600	3	A0A2I3BPG9;P83882	A0A2I3BPG9;P83882	60S ribosomal protein L36a	Rpl36a
0	0	0	0	0	0	0	97130	1	1	1	19.6	19.6	19.6	10.275	0.042	0.48198	751100	1	P61514	P61514	60S ribosomal protein L37a	Rpl37a
0	0	0	0	0	0	0	99109	1	1	1	14.3	14.3	14.3	8.2038	0.014368	0.88414	627300	1	Q9JJI8	Q9JJI8	60S ribosomal protein L38	Rpl38
0	0	0	0	0	0	0	491400	1	1	1	19.6	19.6	19.6	6.4066	0.02046	0.72773	1357900	1	P62892	P62892	60S ribosomal protein L39	Rpl39
940440	560800	746770	384560	504320	816200	1123600	837220	6	6	6	16.2	16.2	16.2	47.153	0	4.7484	6584600	15	Q9D8E6	Q9D8E6	60S ribosomal protein L4	Rpl4
0	304060	386930	326540	0	368220	702970	952940	3	3	3	7.4	7.4	7.4	33.509	0	2.3466	3763900	5	P47911	P47911	60S ribosomal protein L6	Rpl6
904280	583230	760680	418110	575180	0	1086100	1128700	5	5	5	22.2	22.2	22.2	31.419	0	4.9372	5946100	13	P14148;F6XI62	P14148;F6XI62	60S ribosomal protein L7	Rpl7
0	652670	761620	575100	0	486200	1125700	1153000	4	4	4	18	18	18	29.976	0	4.1072	5986900	11	P12970;A0A140T8L3;V9GX35	P12970;A0A140T8L3;V9GX35	60S ribosomal protein L7a	Rpl7a;Gm14214
0	0	513200	0	0	0	742320	0	2	2	2	16	16	16	28.024	0	3.8576	3544400	6	P62918	P62918	60S ribosomal protein L8	Rpl8
0	0	186860	197780	0	0	205060	244220	2	2	2	12.6	12.6	12.6	21.622	0.0093458	1.0112	1010400	3	A0A0G2JES3;A0A140T8T4;P51410;A0A0G2JFQ3;D3YZT0;D3Z629;S4R1R7	A0A0G2JES3;A0A140T8T4;P51410;A0A0G2JFQ3;D3YZT0;D3Z629;S4R1R7	60S ribosomal protein L9	Rpl9;Rpl9-ps1
0	0	156420	0	0	0	185570	136800	3	3	3	11	11	11	34.216	0	2.2366	943430	3	P14869;S4R1N1;D3YVM5	P14869;S4R1N1	60S acidic ribosomal protein P0	Rplp0
0	506280	505130	778580	0	0	1001500	613060	2	2	2	13.9	13.9	13.9	18.916	0.014245	0.87194	4435700	3	P63325;A0A338P731;Q3UW83;A0A338P7K4	P63325;A0A338P731;Q3UW83;A0A338P7K4	40S ribosomal protein S10	Rps10
0	0	0	372580	0	0	0	0	2	2	2	17.7	17.7	17.7	18.431	0.014006	0.83654	2616100	2	P62281;A0A1B0GSE8;A0A1B0GRR3	P62281;A0A1B0GSE8;A0A1B0GRR3	40S ribosomal protein S11	Rps11
0	0	0	0	1112400	0	0	0	1	1	1	16.7	16.7	16.7	14.515	0.0034965	1.2216	263490	2	Q6ZWZ6;F7AEH4;P63323	Q6ZWZ6;F7AEH4;P63323	40S ribosomal protein S12	Rps12
515150	0	0	0	0	0	0	0	2	2	2	22.5	22.5	22.5	16.273	0.0035461	1.225	3671200	4	P62264;D3YVF4;D3Z7I1	P62264;D3YVF4;D3Z7I1	40S ribosomal protein S14	Rps14
0	0	0	0	0	0	0	69212	1	1	1	16.1	16.1	16.1	13.742	0.023697	0.63581	244050	1	D3YTQ9;P62843	D3YTQ9;P62843	40S ribosomal protein S15	Rps15
91483	0	0	0	0	0	0	0	1	1	1	19.7	19.7	19.7	8.1066	0.014327	0.88307	91483	1	D3YVB4;D3Z712;F8WJ41;P62245	D3YVB4;D3Z712;F8WJ41;P62245	40S ribosomal protein S15a	Rps15a
0	317120	0	0	0	0	452600	0	2	2	2	15.8	15.8	15.8	16.445	0	3.103	2012400	3	P14131	P14131	40S ribosomal protein S16	Rps16
0	1559000	1142500	1469400	0	763300	1439000	1634300	4	4	4	31.6	31.6	31.6	14.896	0	2.7027	10676000	11	D3YUT3;D3YUG3;D3Z5R8;D3Z722;Q9CZX8;S4R223	D3YUT3;D3YUG3;D3Z5R8;D3Z722;Q9CZX8;S4R223	40S ribosomal protein S19	Rps19
996240	0	485900	636910	436740	1764900	1656500	1322500	4	4	4	17.4	17.4	17.4	31.231	0	4.2638	7464700	13	P25444;D3YVC1;D3YWJ3;D3Z536	P25444;D3YVC1;D3YWJ3;D3Z536	40S ribosomal protein S2	Rps2;Gm8225
0	0	0	0	0	0	0	371620	1	1	1	9.2	9.2	9.2	13.373	0	1.9788	1862400	2	P60867	P60867	40S ribosomal protein S20	Rps20
0	0	0	0	0	0	325780	0	1	1	1	7.7	7.7	7.7	15.807	0.0031447	1.0338	1103500	3	P62267	P62267	40S ribosomal protein S23	Rps23
0	0	267990	273820	0	0	318490	285730	3	3	3	25.4	25.4	25.4	15.069	0	1.7249	1569900	4	P62849-2;P62849-3;P62849;A0A286YEB7	P62849-2;P62849-3;P62849;A0A286YEB7	40S ribosomal protein S24	Rps24
1099400	1393100	1463400	1231800	0	1715200	1606300	2258500	2	2	2	19.4	19.4	19.4	10.309	0	3.9169	12063000	12	A0A1L1SQA8;P62852	A0A1L1SQA8;P62852	40S ribosomal protein S25	Rps25
0	318760	419680	0	0	0	0	434440	2	2	2	20.9	20.9	20.9	13.015	0.003413	1.1827	2170500	5	P62855	P62855	40S ribosomal protein S26	Rps26
0	1679500	2087500	1594600	0	1880600	1938800	2546400	7	7	7	34.2	34.2	34.2	26.674	0	10.114	14042000	21	P62908;A0A140LI77;D3YV43	P62908;A0A140LI77;D3YV43	40S ribosomal protein S3	Rps3
0	0	0	0	0	0	0	422280	1	1	1	6.4	6.4	6.4	29.885	0.023474	0.62621	2291000	1	P97351	P97351	40S ribosomal protein S3a	Rps3a
0	542390	702530	580330	0	624180	846040	1205600	3	3	3	14.8	14.8	14.8	29.597	0	3.7975	5630300	12	P62702;V9GWY0	P62702	40S ribosomal protein S4, X isoform	Rps4x
0	0	0	0	0	0	203320	0	1	1	1	8.2	8.2	8.2	20.413	0.0090909	0.96979	701780	3	D3YYM6;D3Z1S8;Q91V55	D3YYM6;D3Z1S8;Q91V55		Rps5
514250	0	0	0	0	0	0	0	2	2	2	12.9	12.9	12.9	28.68	0	13.576	2307200	6	P62754	P62754	40S ribosomal protein S6	Rps6
1437100	931540	1146800	750680	845400	1013700	1652600	1494600	5	5	5	30.8	30.8	30.8	24.205	0	6.0985	10044000	19	P62242	P62242	40S ribosomal protein S8	Rps8
1354400	857370	1132900	545930	683350	827900	1364300	1025500	3	3	3	14.4	14.4	14.4	22.591	0	2.4527	8369300	10	Q6ZWN5;F7CJS8;D3YWH9;Q9CXW7	Q6ZWN5;F7CJS8;D3YWH9;Q9CXW7	40S ribosomal protein S9	Rps9
0	0	0	0	78344	0	0	0	1	1	1	6.3	6.3	6.3	23.247	0.0034247	1.1838	109030	1	Q8BI46;S4R2G2;S4R265;S4R2L4;A2RTL5	Q8BI46;S4R2G2;S4R265;S4R2L4;A2RTL5	Arginine/serine-rich coiled-coil protein 2	Rsrc2
0	0	0	0	86154	0	0	0	1	1	1	2.4	2.4	2.4	55.249	0.0040984	1.6413	123040	2	Q99LF4	Q99LF4	tRNA-splicing ligase RtcB homolog	Rtcb
223890	0	0	0	395710	0	0	0	2	2	2	4.9	4.9	4.9	83.571	0.0039526	1.5394	272720	2	Q8K0T0	Q8K0T0	Reticulon-1	Rtn1
0	0	0	0	0	0	0	213790	1	1	1	4.6	4.6	4.6	25.428	0.018277	0.75805	1075400	2	Q9ES97-3;Q9ES97-4;Q9ES97-5;Q9ES97-2;Q9ES97	Q9ES97-3;Q9ES97-4;Q9ES97-5;Q9ES97-2;Q9ES97	Reticulon-3	Rtn3
334990	0	0	0	388170	0	0	0	5	5	5	1.2	1.2	1.2	564.81	0	2.8164	1048900	6	E9Q401;F6U7V1;Q80ZZ5	E9Q401;F6U7V1	Ryanodine receptor 2	Ryr2
0	0	0	0	278380	0	0	0	1	1	1	9.9	9.9	9.9	14.216	0.047016	0.4364	433830	1	A2AUZ6;Q8BX22	A2AUZ6;Q8BX22	Sal-like protein 4	Sall4
0	596870	617390	441990	0	0	0	0	6	6	6	16.6	16.6	16.6	51.863	0	4.5904	2625000	8	Q8BGH2	Q8BGH2	Sorting and assembly machinery component 50 homolog	Samm50
0	0	0	0	0	0	0	826840	2	2	2	1.4	1.4	1.4	90.884	0	2.0132	3701300	2	Q9Z315	Q9Z315	U4/U6.U5 tri-snRNP-associated protein 1	Sart1
5872600	7887000	5798300	3650200	4363900	10151000	7803300	7832500	26	26	25	20.4	20.4	19.9	208.69	0	37.525	57201000	92	Q6ZPE2;Q6ZPE2-2;D6RG52;H3BKD9;F7AWK3;F6S251	Q6ZPE2;Q6ZPE2-2	Myotubularin-related protein 5	Sbf1
55809	0	0	0	0	0	0	0	2	1	1	1.4	0.9	0.9	205.02	0.042424	0.4869	55809	1	E9Q0D4;E9Q305;E9PXF8	E9Q0D4;E9Q305;E9PXF8		Sbf2
0	0	0	0	0	0	0	0	1	1	1	3.4	3.4	3.4	41.042	1	-2	0	1	Q6T707	Q6T707		Scd4
0	2020300	1992500	1428500	0	2525100	2499400	2718000	11	11	11	17.5	17.5	17.5	103.19	0	8.7094	15660000	19	G5E8J9;Q8CFE4;Q8CFE4-2;Q80UY7	G5E8J9;Q8CFE4	SCY1-like protein 2	Scyl2
0	0	0	0	0	0	0	2556500	1	1	1	1.4	1.4	1.4	94.813	0.014749	0.94687	25807000	6	Q3U1C4	Q3U1C4		Secisbp2
0	0	0	0	0	0	0	1532800	1	1	1	8.6	8.6	8.6	20.751	0.029748	0.60023	9709600	3	A2ABP5;Q9D966	A2ABP5;Q9D966		Sectm1b
0	0	0	0	0	0	0	21135	1	1	1	11.3	11.3	11.3	10.881	0.041588	0.45893	89986	1	A0A0J9YUV6;A2A3W1;A0A0J9YTY0;A0A0J9YUL3;Q8C1B7-3;Q9R1T4-2;Q9R1T4-3;Q8C1B7-2;Q8C1B7;Q9R1T4	A0A0J9YUV6;A2A3W1;A0A0J9YTY0;A0A0J9YUL3;Q8C1B7-3;Q9R1T4-2;Q9R1T4-3;Q8C1B7-2;Q8C1B7;Q9R1T4	Septin-11;Septin-6	Sept6;Sept11
0	0	0	0	0	0	0	75747	1	1	1	10.9	10.9	10.9	16.078	0.033333	0.56655	532960	2	A0A0N4SUQ1;A0A0N4SUN8;A0A0N4SWH2;A0A0N4SV32;Q3UMP4;Q9CY58-4;Q9CY58-3;Q9CY58-2;Q9CY58	A0A0N4SUQ1;A0A0N4SUN8;A0A0N4SWH2;A0A0N4SV32;Q3UMP4;Q9CY58-4;Q9CY58-3;Q9CY58-2;Q9CY58	Plasminogen activator inhibitor 1 RNA-binding protein	Serbp1
0	0	0	0	1229900	0	0	0	1	1	1	5.5	5.5	5.5	46.672	0	4.4744	253490	1	A0A0R4J0I1;P07759	A0A0R4J0I1;P07759	Serine protease inhibitor A3K	Serpina3k
0	0	0	0	0	0	0	289870	1	1	1	0.8	0.8	0.8	145.83	1	-2	350990	1	G5E866;Q99NB9	G5E866;Q99NB9	Splicing factor 3B subunit 1	Sf3b1
0	0	311630	0	0	0	0	0	3	2	2	12.9	8.9	8.9	27.706	0	1.8031	671040	2	O70456	O70456	14-3-3 protein sigma	Sfn
0	0	0	126510	0	0	0	0	1	1	1	16.1	16.1	16.1	10.493	0.037657	0.50264	72605	1	A0A087WQU5;A0A087WS96;Q8BG73	A0A087WQU5;A0A087WS96;Q8BG73	SH3 domain-binding glutamic acid-rich-like protein;SH3 domain-binding glutamic acid-rich-like protein 2	Sh3bgrl2
0	0	0	0	0	0	0	2636200	1	1	1	11.8	11.8	11.8	10.477	0.048904	0.40257	5652500	1	Q91VW3	Q91VW3	SH3 domain-binding glutamic acid-rich-like protein 3	Sh3bgrl3
0	315890	0	0	0	0	0	0	1	1	1	3.1	3.1	3.1	43.374	1	-2	331230	0	Q99LH9	Q99LH9	SH3 domain-binding protein 5-like	Sh3bp5l
0	0	0	0	0	0	0	92439000	1	1	1	1.9	1.9	1.9	86.075	0.0032051	1.0574	118510000	2	Q91X43	Q91X43	SH3 domain-containing protein 19	Sh3d19
0	0	166380000	295740000	0	0	0	0	2	2	2	3.5	3.5	3.5	60.323	0	2.1312	928330000	7	Q7TSG5;Z4YK11;Q7TSG5-2	Q7TSG5;Z4YK11;Q7TSG5-2	SH3 domain-containing protein 21	Sh3d21
0	0	0	0	0	0	0	23716000	1	1	1	1.4	1.4	1.4	134.61	0.021898	0.68025	115880000	1	A0A1C7ZMY3;D3Z5K8;Q80Z38-3;Q80Z38-2;Q80Z38	A0A1C7ZMY3;D3Z5K8;Q80Z38-3;Q80Z38-2;Q80Z38	SH3 and multiple ankyrin repeat domains protein 2	Shank2
0	0	0	0	0	0	0	151220	1	1	1	7.9	7.9	7.9	15.912	0.047359	0.43817	183110	0	A0A1Y7VMP9;Q9WVL3-2;Q9WVL3	A0A1Y7VMP9;Q9WVL3-2;Q9WVL3	Solute carrier family 12 member 7	Slc12a7
2935900	2575700	2642800	1908200	2388100	2488600	2315100	2619300	6	6	6	13.4	13.4	13.4	64.56	0	6.1226	19497000	16	Q8BLE7;A0A0R4J0A6;A0A140LHC9	Q8BLE7;A0A0R4J0A6	Vesicular glutamate transporter 2	Slc17a6
3138000	1907700	1823700	1093300	2716400	2414900	1727500	2104800	8	8	8	20.8	20.8	20.8	62.03	0	6.822	13658000	17	P43006;A2APL5;P43006-2;P43006-3;F6ZRK3;F7CAM6	P43006;A2APL5;P43006-2;P43006-3;F6ZRK3	Excitatory amino acid transporter 2;Amino acid transporter	Slc1a2
478810	0	395660	374120	715510	0	680460	0	3	3	3	8.8	8.8	8.8	59.622	0	2.5549	2729900	10	P56564;D3YY51;A0A1W2P762;O35544	P56564	Excitatory amino acid transporter 1	Slc1a3
271190	0	0	0	0	0	0	0	2	2	2	12.4	12.4	12.4	20.815	0.0033223	1.1376	285980	2	Q5SX46;Q9CR62	Q5SX46;Q9CR62	Mitochondrial 2-oxoglutarate/malate carrier protein	Slc25a11
0	438320	390420	0	0	397620	341930	524430	7	7	7	12.7	12.7	12.7	74.569	0	5.7177	3201100	10	Q8BH59;V9GXX9;Q9QXX4	Q8BH59	Calcium-binding mitochondrial carrier protein Aralar1	Slc25a12
0	0	0	0	0	0	297210	0	2	2	2	10.2	10.2	10.2	22.109	0.00369	1.3005	1238900	4	E9PV90;E9PY45;Q9DB41-2;Q9DB41;Q9D6M3;V9GWS2;A0A0J9YUX4;Q80X52;E9Q579;A0A0J9YTY6;E9Q6M6	E9PV90;E9PY45;Q9DB41-2;Q9DB41;Q9D6M3;V9GWS2;A0A0J9YUX4;Q80X52;E9Q579;A0A0J9YTY6;E9Q6M6	Mitochondrial glutamate carrier 2;Mitochondrial glutamate carrier 1	Slc25a22;Slc25a18
722130	0	0	0	827790	0	0	0	3	3	3	11.2	11.2	11.2	39.736	0	2.8206	3311700	6	G5E902;Q8VEM8	G5E902;Q8VEM8	Phosphate carrier protein, mitochondrial	Slc25a3
8026500	8520600	7588600	3253000	8032600	8153000	6988700	7026100	10	10	6	34.6	34.6	21.8	32.904	0	10.466	58449000	33	P48962;Q3V132	P48962	ADP/ATP translocase 1	Slc25a4
2513300	2436900	2217700	1251700	3071100	1175600	2075200	1895100	9	5	5	31.5	18.8	18.8	32.931	0	7.4914	15460000	15	P51881	P51881	ADP/ATP translocase 2;ADP/ATP translocase 2, N-terminally processed	Slc25a5
0	0	0	0	0	0	119900	0	1	1	1	2.5	2.5	2.5	50.569	1	-2	1070000	1	A2AMH8;A2AMH3;A2AMH5;A2AMH4;Q6X893;Q6X893-2	A2AMH8;A2AMH3;A2AMH5;A2AMH4;Q6X893;Q6X893-2	Choline transporter-like protein 1	Slc44a1
0	0	0	0	0	0	0	735470	1	1	1	3.9	3.9	3.9	73.317	0.036735	0.49705	3759400	1	Q9QXI6;Q8C3K6	Q9QXI6;Q8C3K6	Sodium/glucose cotransporter 1	Slc5a1
899230	1217600	848130	709520	1260800	1236200	847950	1084200	7	7	7	10.1	10.1	10.1	102.38	0	5.3959	7621700	15	S4R2P9-2;E9PX50;S4R2P9;S4R2V4	S4R2P9-2;E9PX50;S4R2P9		Slc8a3
0	0	0	284310	0	0	0	0	1	1	1	2	2	2	73.474	0.048359	0.41428	1808200	1	Q8BTK5-2;Q8BTK5	Q8BTK5-2;Q8BTK5	SET and MYND domain-containing protein 4	Smyd4
631110	0	0	0	596090	0	0	0	3	3	3	19.4	19.4	19.4	23.315	0	13.213	744930	3	P60879;B0R029;E9Q8A1;B0R030;Q9D3L3;P60879-2;O09044	P60879	Synaptosomal-associated protein 25	Snap25
0	0	0	0	0	0	0	92539	1	1	1	9.7	9.7	9.7	18.885	0.042226	0.46764	547190	1	Q8K194;Q8K194-2	Q8K194;Q8K194-2	U4/U6.U5 small nuclear ribonucleoprotein 27 kDa protein	Snrnp27
0	0	0	506400	0	0	0	0	2	2	2	24.6	24.6	24.6	13.527	0	1.7546	2015900	2	P62317	P62317	Small nuclear ribonucleoprotein Sm D2	Snrpd2
0	0	0	0	0	0	0	128430	1	1	1	7.1	7.1	7.1	13.916	0.03871	0.52811	1477400	5	P62320	P62320	Small nuclear ribonucleoprotein Sm D3	Snrpd3
0	0	0	0	0	0	0	68345	1	1	1	3.2	3.2	3.2	46.646	0.03139	0.58678	573820	0	Q80ZJ7	Q80ZJ7	Sorting nexin-32	Snx32
850840	915210	1013300	616030	918530	1571100	987980	1984900	10	10	10	12.6	12.6	12.6	103.48	0	8.8902	9607900	24	Q6NZL0;B8JJI7;H3BL83;A2ACV6;E1U8D0;Q3UHU5-2;Q3UHU5-3;Q3UHU5	Q6NZL0	Protein SOGA3	Soga3
0	0	0	0	0	52308000	0	0	1	1	1	1.8	1.8	1.8	54.937	0.047038	0.41965	36553000	1	Q8C0J6	Q8C0J6	Ankyrin repeat domain-containing protein SOWAHC	Sowahc
490710	0	0	0	0	0	0	0	1	1	1	2.5	2.5	2.5	51.077	1	-2	490710	1	Q9D5R4	Q9D5R4	Spermatogenesis-associated protein 1	Spata1
10431000	2091500	1814400	1449100	3472300	1432200	2678200	2077300	42	42	42	22	22	22	282.89	0	66.181	21263000	70	A3KGU5;A3KGU7;E9Q447;A3KGU9;P16546-2;P16546;A3KGU4;P08032	A3KGU5;A3KGU7;E9Q447;A3KGU9;P16546-2;P16546	Spectrin alpha chain, non-erythrocytic 1	Sptan1
4899000	3596000	2847200	1970200	3348600	2082300	4484600	4092600	39	39	39	22	22	22	274.22	0	34.459	26717000	73	Q62261;Q62261-2;A0A0A0MQG2;Q68FG2;E9Q397;Q3UGX2;Q91ZE6;E9PX29;P15508	Q62261;Q62261-2;A0A0A0MQG2	Spectrin beta chain, non-erythrocytic 1	Sptbn1
32110	0	0	0	0	0	0	0	1	1	1	3	3	3	55.815	0.042339	0.48658	32110	0	E9PXC0;P14576	E9PXC0;P14576	Signal recognition particle 54 kDa protein	Srp54c;Srp54
0	0	0	0	0	0	0	0	1	1	1	8.2	8.2	8.2	15.354	0	1.6749	0	2	A0A0G2JG74;Q6P5E1;A0A0R4J124;O54781	A0A0G2JG74;Q6P5E1;A0A0R4J124;O54781	SRSF protein kinase 2;SRSF protein kinase 2 N-terminal;SRSF protein kinase 2 C-terminal	Srpk2
0	0	222050	146320	0	0	187360	0	3	3	3	2	2	2	285.15	0	2.3295	1070300	4	Q8BTI8-3;Q8BTI8-2;Q8BTI8;A0A087WPS9;A0A087WRX8	Q8BTI8-3;Q8BTI8-2;Q8BTI8	Serine/arginine repetitive matrix protein 2	Srrm2
0	627890	701430	742610	0	425120	622550	938490	4	4	4	15.8	15.8	15.8	28.329	0	8.5959	4770200	8	H7BX95;Q6PDM2-3;Q6PDM2-2;Q6PDM2;F7AI47	H7BX95;Q6PDM2-3;Q6PDM2-2;Q6PDM2;F7AI47	Serine/arginine-rich splicing factor 1	Srsf1
341350	0	0	0	0	0	0	0	2	2	2	6.5	6.5	6.5	53.102	0.003367	1.1728	1270000	3	Q3UIX4;F6RDI8;E9Q6E5;A0A0G2JEG1;D3Z4B0	Q3UIX4;F6RDI8;E9Q6E5;A0A0G2JEG1;D3Z4B0		Srsf11
0	0	702560	0	0	0	620040	0	2	2	2	10.9	10.9	10.9	25.476	0.0091185	0.97087	4412100	2	Q62093	Q62093	Serine/arginine-rich splicing factor 2	Srsf2
1305000	948880	798930	935070	887630	857910	1296400	1176600	4	4	3	25.6	25.6	25.6	19.329	0	4.1303	8326300	7	P84104;P84104-2;A2A4X6	P84104;P84104-2;A2A4X6	Serine/arginine-rich splicing factor 3	Srsf3;Gm12355
0	0	0	0	110430	0	0	0	1	1	1	5.6	5.6	5.6	30.978	0.018325	0.76115	126890	1	Q9D8S5;O35326	Q9D8S5;O35326	Serine/arginine-rich splicing factor 5	Srsf5
0	0	0	0	110840	0	0	0	2	1	1	16.6	7.6	7.6	17.89	0.030233	0.60921	184670	1	Q8BL97-3;Q8BL97-4;Q8BL97-2;Q8BL97	Q8BL97-3;Q8BL97-4;Q8BL97-2;Q8BL97	Serine/arginine-rich splicing factor 7	Srsf7
0	0	0	0	0	0	0	116770	1	1	1	2.1	2.1	2.1	71.527	0.047619	0.43932	402520	0	A2AW05;Q08943;Q08943-2	A2AW05;Q08943;Q08943-2	FACT complex subunit SSRP1	Ssrp1
44393	0	0	0	0	0	0	0	1	1	1	2.9	2.9	2.9	47.359	0.037344	0.49978	44393	1	O88829	O88829	Lactosylceramide alpha-2,3-sialyltransferase	St3gal5
0	0	0	0	0	0	0	111450	2	1	1	4.5	2.2	2.2	54.174	0.041985	0.46739	690940	1	Q91VJ4	Q91VJ4	Serine/threonine-protein kinase 38	Stk38
0	0	0	0	0	0	140540	0	2	2	1	4.5	4.5	2.2	53.771	0	1.8846	820710	2	Q7TSE6;Q7TSE6-2	Q7TSE6;Q7TSE6-2	Serine/threonine-protein kinase 38-like	Stk38l
580010	0	0	162260	340680	266150	186280	0	3	3	3	12.5	12.5	12.5	33.054	0	1.919	1333700	5	O35526;D6RFB9;A0A0J9YUA0	O35526;D6RFB9;A0A0J9YUA0	Syntaxin-1A	Stx1a
0	486800	313160	196790	0	0	237610	252650	3	3	3	13.9	13.9	13.9	33.244	0	6.4215	2760500	6	P61264	P61264	Syntaxin-1B	Stx1b
363820	0	0	0	323250	0	0	0	2	2	2	3.4	3.4	3.4	67.568	0.0037736	1.3578	899100	3	O08599;O08599-2	O08599;O08599-2	Syntaxin-binding protein 1	Stxbp1
0	0	0	0	0	0	0	328320	2	2	2	15.7	15.7	15.7	14.427	0	3.9493	1711500	3	P11031	P11031	Activated RNA polymerase II transcriptional coactivator p15	Sub1
0	0	239190	0	0	0	201410	295400	2	2	2	3.2	3.2	3.2	82.646	0.0040816	1.6161	1529000	4	Q9JIS5	Q9JIS5	Synaptic vesicle glycoprotein 2A	Sv2a
0	0	0	0	228420	0	0	0	2	2	2	3.2	3.2	3.2	77.456	0.014045	0.84396	391120	2	Q8BG39	Q8BG39	Synaptic vesicle glycoprotein 2B	Sv2b
0	0	0	0	0	0	0	142430	1	1	1	17.9	17.9	17.9	7.4052	0.020202	0.70938	739830	2	G3UXU5;S4R1E9;G3UWM1;A2AW41;G3UXJ6;G3UZ48;G3UZI2;F7B5B5;A0A0R4J259;G3V018;Q8VHM5;Q7TMK9-2;Q7TMK9	G3UXU5;S4R1E9;G3UWM1;A2AW41;G3UXJ6;G3UZ48;G3UZI2;F7B5B5;A0A0R4J259;G3V018;Q8VHM5;Q7TMK9-2;Q7TMK9	Heterogeneous nuclear ribonucleoprotein Q	Syncrip;Hnrnpr
0	0	0	0	0	0	0	170060	1	1	1	5.2	5.2	5.2	24.561	0.0090634	0.96883	968170	2	Q8R191	Q8R191	Synaptogyrin-3	Syngr3
0	0	287920	0	0	0	0	0	2	2	2	7.3	7.3	7.3	34.024	0.0035714	1.2332	2498100	5	Q62277;F6VR28	Q62277;F6VR28	Synaptophysin	Syp
3740400	2621900	1950500	1018100	3270800	1186500	2662100	2497800	10	10	10	30.9	30.9	30.9	47.417	0	26.502	19530000	32	P46096;A0A0R4J2C2;P46097;Q9R0N5	P46096	Synaptotagmin-1	Syt1
0	0	0	0	0	0	11519000	0	1	1	1	2.5	2.5	2.5	61.395	0.0091463	0.97178	42235000	3	V9GXW1	V9GXW1		Szt2
0	0	0	0	0	0	0	85595	1	1	1	7	7	7	22.038	0.0031546	1.0373	619030	1	Q8CCT4	Q8CCT4	Transcription elongation factor A protein-like 5	Tceal5
0	0	0	0	0	310460	0	0	1	1	1	4.1	4.1	4.1	27.364	0.036511	0.49351	216950	1	E9QA37;Q9D9J2	E9QA37;Q9D9J2	Testis-expressed sequence 33 protein	Tex33
0	0	0	0	240360	0	0	0	1	1	1	4.3	4.3	4.3	96.304	0.023585	0.63314	29711	0	Q9ERA6	Q9ERA6	Tuftelin-interacting protein 11	Tfip11
0	0	0	0	0	0	0	174680	1	1	1	2.1	2.1	2.1	74.377	1	-2	1141700	1	Q91YX0	Q91YX0	Protein THEMIS2	Themis2
0	0	0	0	0	0	0	195660	1	1	1	1.3	1.3	1.3	80.11	0.049573	0.40827	1160600	2	Q8BZN7;Q569Z6	Q8BZN7;Q569Z6	Thyroid hormone receptor-associated protein 3	Thrap3
0	0	0	0	390070	0	0	0	1	1	1	8	8	8	14.038	0.020151	0.70475	346560	1	A0A1L1SUX8;P01831	A0A1L1SUX8;P01831	Thy-1 membrane glycoprotein	Thy1
0	0	0	0	812340	0	0	0	1	1	1	4.8	4.8	4.8	53.879	0.0035842	1.2377	214290	1	A0A286YE28;P40142	A0A286YE28;P40142	Transketolase	Tkt
0	0	0	0	0	0	0	349550	1	1	1	2.7	2.7	2.7	34.644	0.041176	0.47621	1862400	1	P43345	P43345	T-cell leukemia homeobox protein 1	Tlx1
0	0	0	0	39038000	0	0	0	1	1	1	5.2	5.2	5.2	41.636	1	-2	42285000	1	Q3UP23	Q3UP23	Transmembrane protein 26	Tmem26
0	2807100	2238400	2589900	0	0	2029000	1716100	6	6	6	25.1	25.1	25.1	39.51	0	18.357	13885000	13	Q9JKK7;Q9JKK7-3;A0A1L1SU70;A0A1L1SRR7;Q9JKK7-2	Q9JKK7;Q9JKK7-3;A0A1L1SU70	Tropomodulin-2	Tmod2
0	2394000	4125700	3684100	0	536910	2962400	2197900	10	10	10	34.9	34.9	34.9	39.502	0	21.543	19823000	28	Q9JHJ0;A0A1L1SQ12;A0A1L1SR42	Q9JHJ0	Tropomodulin-3	Tmod3
0	315380	497650	0	0	196150	293150	0	3	3	3	12.7	12.7	12.7	32.191	0	2.0528	2101500	4	P17751;H7BXC3	P17751;H7BXC3	Triosephosphate isomerase	Tpi1
729710	1749000	4836600	2114800	886670	0	3191000	2047200	6	6	5	29	29	24.9	28.482	0	6.5448	20058000	20	E9Q453;G5E8R0;E9Q455;E9Q456;G5E8R1;G5E8R2;E9Q452;E9Q454;E9Q450;E9Q448;B7ZNL3;Q8BP43;Q8BSH3;S4R261;F8WID5;P58771-2;P58771;A2AIM4;A2AIM5;CON__Q3SX28;S4R2U0;P58774-2;P58774	E9Q453;G5E8R0;E9Q455;E9Q456;G5E8R1;G5E8R2;E9Q452		Tpm1
0	696070	1374000	550090	0	0	834040	509990	5	4	4	22.3	18.2	18.2	28.723	0	4.0091	5400700	15	D3Z6I8;E9Q7Q3;P21107-2;D3Z2H9;A0A0R4J1P2;E9Q5J9;P21107;D3YVR0	D3Z6I8;E9Q7Q3;P21107-2;D3Z2H9;A0A0R4J1P2;E9Q5J9;P21107	Tropomyosin alpha-3 chain	Tpm3;Tpm3-rs7
412590	0	0	0	0	0	0	0	2	2	2	12.4	12.4	12.4	23.574	0.0036101	1.255	447040	2	Q7TQD2	Q7TQD2	Tubulin polymerization-promoting protein	Tppp
0	0	0	0	0	0	511070	0	1	1	1	1.1	1.1	1.1	95.407	0.042553	0.47274	867450	1	E9PZ41;E9Q3T8;Q3U0M1-4;Q3U0M1-3;Q3U0M1-2;Q3U0M1	E9PZ41;E9Q3T8;Q3U0M1-4;Q3U0M1-3;Q3U0M1-2;Q3U0M1	Trafficking protein particle complex subunit 9	Trappc9
0	0	238870	186800	0	0	226160	248280	3	3	3	5.4	5.4	5.4	53.327	0	2.0588	1328500	4	Q3U7K7;Q62191	Q3U7K7;Q62191	E3 ubiquitin-protein ligase TRIM21	Trim21
54891	0	0	0	0	0	0	0	1	1	1	1.3	1.3	1.3	88.846	0.047273	0.43714	54891	1	Q62318	Q62318	Transcription intermediary factor 1-beta	Trim28
55089	0	0	0	0	0	0	0	1	1	1	1.5	1.5	1.5	78.271	0.02	0.70072	55089	1	Q3TDT0;D3YUY7;Q9R1R2	Q3TDT0;D3YUY7;Q9R1R2	Tripartite motif-containing protein 3	Trim3
0	0	0	0	0	0	0	1243400	1	1	1	2.9	2.9	2.9	82.79	0.021951	0.68042	5540200	1	Q80WG7	Q80WG7	E3 ubiquitin-protein ligase Trim36	Trim36
7514900	19374000	45245000	114980000	3167900	9132500	45417000	41253000	2	2	2	14.6	14.6	14.6	26.221	0	9.7142	289750000	51	Q792Z1	Q792Z1		Try10
0	0	0	0	0	0	25654	0	1	1	1	8.1	8.1	8.1	26.274	0.004	1.551	1157700	2	Q9R0T7;Q9QUK9	Q9R0T7;Q9QUK9		Try4;Try5
0	0	0	0	0	0	622700	0	1	1	1	11.9	11.9	11.9	19.348	0.04461	0.45234	3821200	1	A0A1D5RLR0;Q9QZE7	A0A1D5RLR0;Q9QZE7	Translin-associated protein X	Tsnax
226290	0	0	0	0	0	0	0	3	3	3	4.7	4.7	4.7	94.202	0	1.8759	453980	3	E9Q6P5;A0A1Y7VL44	E9Q6P5;A0A1Y7VL44		Ttc7b
0	0	1418600	0	0	0	1491700	0	15	2	1	51	6	3.1	50.135	0	9.1514	7952500	9	P68369;P05214	P68369;P05214	Tubulin alpha-1A chain;Tubulin alpha-3 chain	Tuba1a;Tuba3a
23095000	30660000	27012000	15449000	26813000	31722000	27802000	25731000	15	15	0	51	51	0	50.151	0	168.24	220290000	135	P05213;A0A2R8VHF3	P05213	Tubulin alpha-1B chain	Tuba1b
3230800	2540600	2516400	1301000	3622300	3622000	2393600	2055900	15	4	4	48.2	11.3	11.3	52.793	0	4.4612	21462000	18	A0A0A0MQA5;P68368;A0A087WQS4;A0A087WSB0;A0A087WSL5;A0A087WRB4;A0A087WS35;Q3UX10	A0A0A0MQA5;P68368	Tubulin alpha-4A chain	Tuba4a
6736700	5868300	6115200	2769200	6726600	1242900	5612900	5410200	19	5	1	59.6	16.9	2.7	49.906	0	92.874	45685000	35	Q7TMM9	Q7TMM9	Tubulin beta-2A chain	Tubb2a
0	0	0	0	0	0	0	326690	19	1	1	59.6	2.7	2.7	49.953	0.0031746	1.0428	2093600	4	Q9CWF2	Q9CWF2	Tubulin beta-2B chain	Tubb2b
1417800	1418500	2146300	986110	1435000	0	1486100	1356300	16	6	5	48	22.7	20.7	50.418	0	48.979	11279000	15	Q9ERD7;A0A1D5RM76;CON__ENSEMBL:ENSBTAP00000025008;A2AQ07	Q9ERD7	Tubulin beta-3 chain	Tubb3
2599500	1769500	1751400	891970	2719500	0	1606900	1791200	20	4	4	71.4	14.2	14.2	49.585	0	9.3189	14964000	22	Q9D6F9	Q9D6F9	Tubulin beta-4A chain	Tubb4a
31647000	25127000	30135000	14110000	31880000	23213000	28342000	25800000	21	21	1	70.6	70.6	2.7	49.83	0	323.31	254200000	206	P68372;G3UZR1	P68372	Tubulin beta-4B chain	Tubb4b
6401300	5303900	6210400	3074800	5159800	3462200	5918700	5199100	19	4	3	60.8	13.3	9.9	49.67	0	61.685	51525000	30	P99024	P99024	Tubulin beta-5 chain	Tubb5
0	0	0	0	0	0	0	206990	1	1	1	9.5	9.5	9.5	21.392	0.047368	0.42273	250630	1	F6Q5J9	F6Q5J9		Tubd1
0	0	278890	0	0	0	0	407700	2	2	2	6	6	6	47.222	0.0039683	1.5451	2382700	3	Q8BFR5-2;Q8BFR5;A0A0U1RPC4;A0A0U1RNQ6	Q8BFR5-2;Q8BFR5;A0A0U1RPC4;A0A0U1RNQ6	Elongation factor Tu, mitochondrial	Tufm
94535	0	0	0	0	0	0	0	1	1	1	32.4	32.4	32.4	3.9143	0.02005	0.70166	94535	1	E9PWX6;E9PWM2;E9Q809;F8WH71;E9Q5Y2;E9PUZ3;E9Q1I7;E9Q5J3;G3UW94;Q8BGJ9-4;Q8BGJ9-2;Q8BGJ9;Q9D883;Q8BGJ9-3	E9PWX6;E9PWM2;E9Q809;F8WH71;E9Q5Y2;E9PUZ3;E9Q1I7;E9Q5J3;G3UW94;Q8BGJ9-4;Q8BGJ9-2;Q8BGJ9;Q9D883;Q8BGJ9-3	Splicing factor U2AF 26 kDa subunit;Splicing factor U2AF 35 kDa subunit	U2af1l4;U2af1
0	0	0	0	0	0	0	1383500	1	1	1	5.2	5.2	5.2	25.848	0.038217	0.51968	10230000	0	B0QZM1;B1ASK8;Q6P073	B0QZM1;B1ASK8;Q6P073	Ubiquitin-conjugating enzyme E2 J2	Ube2j2
0	0	0	0	0	0	0	49759000	1	1	1	1.1	1.1	1.1	200.24	0.014663	0.936	184900000	3	O70481	O70481	E3 ubiquitin-protein ligase UBR1	Ubr1
0	0	0	0	0	0	40231	0	1	1	1	1	1	1	122.66	0.02381	0.63774	2538900	1	Q9EPU0-2;Q9EPU0	Q9EPU0-2;Q9EPU0	Regulator of nonsense transcripts 1	Upf1
0	0	0	0	182980	0	0	0	2	2	2	43.1	43.1	43.1	6.3814	0.0032895	1.125	1339100	2	Q78IK2	Q78IK2	Up-regulated during skeletal muscle growth protein 5	Usmg5
0	0	0	0	0	0	0	119200000	1	1	1	3.9	3.9	3.9	52.042	0.018373	0.76408	338990000	3	E9Q9U0-2;E9Q9U0	E9Q9U0-2;E9Q9U0	Ubiquitin carboxyl-terminal hydrolase	Usp17lb
0	0	0	0	0	557170	0	0	1	1	1	1.2	1.2	1.2	123.36	1	-2	389360	0	A6PWR8;Q8BUM9;Q8BUM9-2	A6PWR8;Q8BUM9;Q8BUM9-2	Ubiquitin carboxyl-terminal hydrolase 43	Usp43
1205600	547640	817420	360460	850580	0	854320	558960	4	4	4	24.5	24.5	24.5	17.862	0	6.7352	4282200	9	B0QZN5;P63044;P63024;A0A0N4SUV3;D3YTU0;Q62442-2;Q62442	B0QZN5;P63044;P63024	Vesicle-associated membrane protein 2;Vesicle-associated membrane protein 3	Vamp2;Vamp3
0	0	0	0	0	0	0	264620	1	1	1	4.9	4.9	4.9	26.918	0.014793	0.95119	1458900	2	Q8BH80;Q9QY76;Q9WV55	Q8BH80;Q9QY76;Q9WV55	Vesicle-associated membrane protein-associated protein B;Vesicle-associated membrane protein-associated protein A	Vapb;Vapa
0	0	0	0	214010	0	0	0	1	1	1	1.1	1.1	1.1	134.44	0.01676	0.83079	188940	0	A0A0R4J0M9;Q8CDG3-2;Q8CDG3	A0A0R4J0M9;Q8CDG3-2;Q8CDG3	Deubiquitinating protein VCIP135	Vcpip1
2545300	3455500	3849500	976680	1270100	1033100	582640	632950	8	8	8	37.8	37.8	37.8	32.351	0	8.945	16696000	19	Q60932;Q60932-2;F2Z471	Q60932;Q60932-2;F2Z471	Voltage-dependent anion-selective channel protein 1	Vdac1
0	1291200	1581200	578990	0	439190	286980	293950	6	6	6	30.7	30.7	30.7	30.446	0	8.6365	6476100	10	G3UX26;Q60930;D3YZT5;A0A286YCR8;D3YUN8	G3UX26;Q60930;D3YZT5;A0A286YCR8	Voltage-dependent anion-selective channel protein 2	Vdac2
536870	394720	961840	481050	0	434820	0	0	3	3	3	14.1	14.1	14.1	30.851	0	4.1376	3374900	8	J3QMG3;Q60931	J3QMG3;Q60931	Voltage-dependent anion-selective channel protein 3	Vdac3
0	0	0	0	0	0	0	103090000	1	1	1	12.1	12.1	12.1	15.813	1	-2	610350000	1	D3YZN9;D3Z669	D3YZN9;D3Z669		Vill
0	2327900	0	0	0	0	0	0	2	2	2	6.2	6.2	6.2	53.687	0	56.93	2481900	6	P20152;A0A0A6YWC8;A2AKJ2	P20152;A0A0A6YWC8;A2AKJ2	Vimentin	Vim
0	0	0	0	0	0	0	364880	1	1	1	3.6	3.6	3.6	37.752	1	-2	1771600	0	Q05A06	Q05A06		Vmn1r236
336160	0	0	0	0	0	0	0	1	1	1	2.1	2.1	2.1	84.328	1	-2	336160	1	A0A1L1SS63;Q8BX70-2;Q8BX70-3;Q8BX70	A0A1L1SS63;Q8BX70-2;Q8BX70-3;Q8BX70	Vacuolar protein sorting-associated protein 13C	Vps13c
0	0	0	0	214550	0	0	0	1	1	1	2.4	2.4	2.4	54.073	0.047445	0.439	218300	1	Q8BH43	Q8BH43	Wiskott-Aldrich syndrome protein family member 2	Wasf2
0	0	0	0	0	0	226830	0	3	3	3	4.5	4.5	4.5	102.31	0	2.1736	493490	4	Q8CGF6	Q8CGF6	WD repeat-containing protein 47	Wdr47
0	0	0	0	0	0	61007	0	1	1	1	0.8	0.8	0.8	160.32	0.038462	0.5248	77651	1	Q920I9-2;Q920I9	Q920I9-2;Q920I9	WD repeat-containing protein 7	Wdr7
2959200	1727500	2996400	1670300	2483800	0	1903300	1200300	5	5	5	24	24	24	36.942	0	44.822	15716000	21	Q99J09;F7D5L2	Q99J09;F7D5L2	Methylosome protein 50	Wdr77
0	1276900	1266500	1513000	0	0	1223300	1368200	3	3	3	28.2	28.2	28.2	22.678	0	2.5276	7828600	5	Q8CHP5-2;Q8CHP5	Q8CHP5-2;Q8CHP5	Partner of Y14 and mago	Wibg
0	0	382650	467170	0	0	484780	468230	2	2	2	11.2	11.2	11.2	35.73	0	2.6543	2343200	5	P62960;A2BGG7;A0A0A0MQD2;B2RUF0;Q9Z2C8-2;Q9JKB3-2;Q9Z2C8;Q9JKB3	P62960;A2BGG7;A0A0A0MQD2;B2RUF0;Q9Z2C8-2;Q9JKB3-2;Q9Z2C8;Q9JKB3	Nuclease-sensitive element-binding protein 1;Y-box-binding protein 2;Y-box-binding protein 3	Ybx1;Ybx2;Ybx3
0	0	0	0	0	0	0	61403	2	1	1	11.4	7.5	7.5	29.174	1	-2	141640	1	P62259	P62259	14-3-3 protein epsilon	Ywhae
0	0	0	0	205330	0	0	0	2	1	1	9.7	5.7	5.7	28.302	1	-2	251030	1	P61982	P61982	14-3-3 protein gamma;14-3-3 protein gamma, N-terminally processed	Ywhag
75916	0	0	0	0	0	0	0	2	1	1	8.9	4.9	4.9	28.211	0.035398	0.55606	75916	1	P68510	P68510	14-3-3 protein eta	Ywhah
863240	611990	643220	362160	1005200	607480	623580	494760	4	4	3	19.3	19.3	15.8	32.221	0	9.7949	5222700	13	F6YY69;F6VW30;P68254-2;P68254;Q9CQV8-2;Q9CQV8	F6YY69;F6VW30;P68254-2;P68254	14-3-3 protein theta	Ywhaq
0	0	0	0	432940	0	0	0	3	2	2	15.9	11.8	11.8	27.771	0.0037879	1.3696	718170	2	P63101;A0A2I3BQ03	P63101;A0A2I3BQ03	14-3-3 protein zeta/delta	Ywhaz
0	0	0	0	0	0	0	0	1	1	1	0.5	0.5	0.5	166.67	1	-2	0	1	Q80U44	Q80U44	Zinc finger FYVE domain-containing protein 16	Zfyve16
0	0	0	0	0	0	0	134680	1	1	1	1.1	1.1	1.1	151.12	0.047203	0.42244	1725700	1	Q8BZ47	Q8BZ47	Zinc finger protein 609	Znf609
0	0	0	0	0	0	0	494030	1	1	1	2.1	2.1	2.1	71.792	0.047934	0.39339	2830600	1	Q9D9X6	Q9D9X6	E3 ubiquitin-protein ligase Zswim2	Zswim2
0	0	0	0	192370	0	0	0	1	1	1	2.7	2.7	2.7	53.883	0.047855	0.39281	232950	1	H3BKZ0	H3BKZ0		Zwilch
0	0	0	0	0	0	0	187170	1	1	1	16	16	16	11.575	0.036585	0.49511	937360	1	A0A0G2JE99;P01843	A0A0G2JE99;P01843	Ig lambda-1 chain C region
0	0	0	0	0	0	0	138960	1	1	1	1.1	1.1	1.1	152.67	0.0038023	1.373	1543800	3	A0A0G2JFH2	A0A0G2JFH2
0	0	0	0	911780	0	0	0	1	1	1	11.5	11.5	11.5	13.812	0.031603	0.58917	969520	1	A0A0J9YTY9	A0A0J9YTY9
0	0	0	0	0	335410	0	0	1	1	1	5.4	5.4	5.4	29.463	0.014706	0.93935	557800	1	A0A0J9YUW0	A0A0J9YUW0
0	0	0	0	0	0	0	0	1	1	1	3.6	3.6	3.6	27.877	0.030093	0.60578	0	3	A0A0N4SVK0	A0A0N4SVK0
0	0	0	0	0	0	21120000	0	1	1	1	4.8	4.8	4.8	41.335	0.016304	0.80769	36563000	1	Q8VDS7-1;A0A0R4J2C9	Q8VDS7-1;A0A0R4J2C9
0	0	3235.4	0	0	0	0	0	1	1	1	4	4	4	33.47	0.036961	0.49784	6028.2	0	A0A0U1RPG2	A0A0U1RPG2
0	0	0	0	0	0	82333	0	1	1	1	7.6	7.6	7.6	13.885	0.0089286	0.95556	394000	1	A0A140LI35	A0A140LI35
0	0	0	0	0	0	0	0	1	1	1	0.4	0.4	0.4	231.59	1	-2	0	1	A0A140LJC7	A0A140LJC7
0	0	0	0	134770	0	0	0	2	2	2	20	20	20	12.557	0.0037313	1.306	182030	3	A0A140T8M2;A0A140T8Q1;P01636;P01635	A0A140T8M2;A0A140T8Q1;P01636;P01635	Ig kappa chain V-V region MOPC 149;Ig kappa chain V-V region K2
0	0	0	0	0	0	0	185920	1	1	1	7.8	7.8	7.8	12.656	0.046296	0.44899	944040	2	A0A140T8N9	A0A140T8N9
0	0	0	0	0	0	0	95227	1	1	1	7.9	7.9	7.9	12.127	0.03125	0.57512	562960	1	A0A1L1SQP1	A0A1L1SQP1
0	0	0	0	0	0	0	2917900	1	1	1	12.2	12.2	12.2	18.312	0.016438	0.81032	12818000	4	A0A286YCH6	A0A286YCH6
0	0	0	0	0	0	0	65332	1	1	1	15	15	15	9.1483	0.048576	0.39792	670520	0	A0A286YDX3;A0A286YDB2	A0A286YDX3;A0A286YDB2
0	0	0	0	0	0	0	535090	3	1	1	28.2	14.9	14.9	25.996	1	-2	1030400	1	A0A286YDL6	A0A286YDL6
0	0	0	0	0	0	0	0	1	1	1	14.9	14.9	14.9	4.5789	0.040486	0.48884	0	2	A0A2I3BQD1	A0A2I3BQD1
0	0	0	0	0	0	0	270470	4	1	1	7.7	2.2	2.2	57.919	0.042308	0.4679	425790	1	A0A2R8VHP3	A0A2R8VHP3
0	0	0	3506900	0	0	1221200	3394300	12	6	4	28.1	18.1	14	45.771	0	8.0673	7711500	10	CON__ENSEMBL:ENSP00000377550;CON__P13646-1	CON__ENSEMBL:ENSP00000377550;CON__P13646-1
417040000	1289200000	910810000	1583000000	274280000	1424800000	949730000	1266800000	5	5	5	31.6	31.6	31.6	24.409	0	276.27	8097300000	210	CON__P00761	CON__P00761
0	0	0	0	0	0	0	767750	1	1	1	10.6	10.6	10.6	15.184	0.003663	1.2902	2919700	3	CON__P01966	CON__P01966
10012000	8603600	13266000	28507000	7609200	8210700	10061000	11431000	23	11	3	54.4	33.1	11.9	51.621	0	105.05	104340000	97	CON__P02533;CON__Q61782	CON__P02533
20545000	13167000	44184000	42415000	10290000	16415000	11260000	24953000	28	21	2	52.1	42	3.5	60.044	0	283.5	196100000	104	CON__P02538;CON__O95678;CON__Q8VED5;Q8VED5;CON__P05787;Q6IFZ8;P11679	CON__P02538
0	1383800	1645400	6643700	0	1714800	1803400	1876100	4	4	4	28.1	28.1	28.1	22.975	0	9.2136	14588000	14	CON__P02662	CON__P02662
0	0	63344	1763000	0	120350	1736000	476990	1	1	1	9.1	9.1	9.1	23.583	0	2.5022	4251900	8	CON__P02666	CON__P02666
0	224420	0	929620	0	0	161060	0	2	2	2	15.4	15.4	15.4	18.281	0.018421	0.76437	1309400	2	CON__P02754	CON__P02754
0	1208900	3608400	9504400	0	2966700	3908500	1397800	11	9	8	19.7	17.2	15.8	69.366	0	9.7432	22750000	23	CON__P02768-1	CON__P02768-1
19351000	23772000	14432000	41360000	58364000	36314000	19177000	9575200	19	19	17	32.6	32.6	30.1	69.293	0	185.74	168020000	98	CON__P02769	CON__P02769
17626000	835090	560950	1130200	14651000	7450000	696950	489660	2	2	2	2	2	2	138.44	0	13.84	35632000	14	CON__P04258	CON__P04258
205910000	268210000	411260000	959200000	247420000	460510000	307230000	374620000	39	36	22	59.9	56.2	42.4	66.017	0	323.31	3211000000	644	CON__P04264;E9Q0F0;CON__H-INV:HIT000016045	CON__P04264
0	0	0	0	0	0	0	10882000	1	1	1	8.1	8.1	8.1	26.558	0.03132	0.58339	45996000	1	CON__P07477	CON__P07477
30799000	19758000	38456000	40053000	11869000	18462000	14319000	29537000	26	22	13	58.1	52.9	36.8	51.267	0	265.92	211790000	139	CON__P08779;CON__Q3ZAW8;CON__Q9Z2K1;Q9Z2K1;CON__A2A4G1;B1AQ77;Q61414;Q9D312;CON__Q99456;CON__P35900;CON__Q9D312;CON__Q92764;CON__O76015;CON__O76013;CON__Q14532;CON__Q9UE12;CON__O76014;CON__A2A5Y0;B1ATJ5;CON__Q497I4;CON__Q7Z3Y9;CON__A2AB72;CON__REFSEQ:XP_986630;CON__Q15323;Q8CCX5;CON__Q14525;Q61897;Q62168;Q61765;Q6IFX3;Q8VCW2;Q9Z320;Q497I4;Q8CCX5-2;A1L317;B1AQ75;CON__Q8N1A0;Q9WTL4	CON__P08779
226470000	447880000	716900000	1387900000	206590000	790860000	418160000	632910000	34	34	27	58.7	58.7	52.6	59.51	0	323.31	5065300000	669	CON__P13645;A2A513;CON__P02535-1;P02535-3;P02535-2;P02535;CON__Q7Z3Y7;CON__Q2M2I5	CON__P13645
8578100	16064000	23720000	48052000	7198500	24631000	14724000	21755000	27	16	6	46.3	29.3	12	62.378	0	91.466	171430000	102	CON__P13647	CON__P13647
0	0	0	5119400	0	0	904260	3492100	14	12	7	24.4	21.7	14.3	63.91	0	14.953	8168100	16	CON__P19013	CON__P19013
0	0	227540	0	0	0	0	0	1	1	1	0.2	0.2	0.2	435.16	0.036957	0.54035	496760	2	CON__P20930	CON__P20930
94368000	59204000	85624000	349860000	210670000	106820000	132040000	109350000	29	28	28	65.3	64.2	64.2	62.129	0	323.31	1088900000	291	CON__P35527	CON__P35527
150320000	229860000	364150000	742800000	163720000	540990000	213840000	442750000	45	45	32	77.9	77.9	63.4	65.432	0	323.31	2842100000	574	CON__P35908v2;CON__P35908;CON__Q01546;Q6IFZ9	CON__P35908v2;CON__P35908
0	0	0	0	0	0	0	148670	26	1	0	47.7	1.8	0	60.024	0.042065	0.46739	786070	1	CON__P48668	CON__P48668
1308600	533810	405500	1643200	546990	473450	308700	707140	15	6	2	35.6	20.1	7.4	48.105	0	9.2521	5299800	13	CON__Q04695	CON__Q04695
239790	0	0	0	0	0	0	0	1	1	1	1.6	1.6	1.6	99.536	0.038298	0.52295	239790	1	CON__Q0V8M9	CON__Q0V8M9
0	0	0	91448	0	0	0	0	4	1	1	7.5	2.2	2.2	50.775	0.041667	0.45897	52481	1	CON__Q148H6;CON__Q7Z3Z0;CON__Q7Z3Y8	CON__Q148H6;CON__Q7Z3Z0;CON__Q7Z3Y8
0	0	0	0	0	0	0	215200	1	1	1	1.4	1.4	1.4	93.089	1	-2	829580	0	CON__Q29RQ1	CON__Q29RQ1
559510	1302400	1308200	5195200	1049000	2358200	1201500	1036800	2	2	2	1	1	1	248.07	0	7.774	12694000	15	CON__Q5D862	CON__Q5D862
0	0	0	0	0	0	0	132750	3	3	3	7.5	7.5	7.5	50.525	0	2.5473	1174300	4	CON__Q6KB66-1;Q3TBQ1;A0A2R8VHR6;CON__Q0VBK2;Q0VBK2	CON__Q6KB66-1
0	0	0	0	0	0	0	142600	1	1	1	2.4	2.4	2.4	54.195	1	-2	707020	0	CON__Q6NT21	CON__Q6NT21
466900	664450	566570	1767000	611460	1164000	422740	843440	7	5	5	14	10.6	10.6	56.964	0	4.0056	5590000	14	CON__Q8N1N4-2;CON__Q7RTT2	CON__Q8N1N4-2;CON__Q7RTT2
0	24641000	23106000	81645000	0	33567000	20161000	19313000	10	8	7	19.4	16.1	14	61.802	0	87.177	208730000	27	CON__Q7Z794	CON__Q7Z794
457450	0	229160	1178200	693890	0	0	249920	3	3	3	4.2	4.2	4.2	282.39	0	3.6252	2023100	4	CON__Q86YZ3	CON__Q86YZ3
0	3971300	0	0	0	0	0	0	2	2	2	24.4	24.4	24.4	16.622	0	181.35	4198700	4	CON__Streptavidin	CON__Streptavidin
0	0	137290	0	0	0	0	0	1	1	1	16.2	16.2	16.2	12.005	0.008982	0.96276	255790	1	P01663;P01662	P01663;P01662	Ig kappa chain V-III region PC 4050;Ig kappa chain V-III region ABPC 22/PC 9245
607880000	249110000	499120000	208100000	422440000	60324000	482740000	319400000	8	8	8	82.2	82.2	82.2	11.934	0	323.31	4894000000	588	P01837	P01837	Ig kappa chain C region
0	0	0	0	485490	0	0	0	1	1	1	10.7	10.7	10.7	13.251	0.020619	0.74136	500830	1	P84750	P84750	Ig kappa chain V region Mem5
0	0	0	0	0	0	0	6823300	1	1	1	3.1	3.1	3.1	37.191	0.034858	0.54126	21938000	1	Q80UN9-2	Q80UN9-2
0	0	0	0	0	0	0	4238700	1	1	1	7.3	7.3	7.3	19.243	0.0034483	1.1973	7432200	3	Q9CY57-5;Q9CY57-4;Q9CY57-2	Q9CY57-5;Q9CY57-4;Q9CY57-2
94584	0	0	0	0	0	0	0	1	1	1	6.8	6.8	6.8	32.487	0.009375	1.0175	94584	1	Q9WTJ6-2	Q9WTJ6-2
0	0	0	0	0	0	0	4251100	1	1	1	0	0	0	48.423	0.038793	0.52859	24212000	2	REV__Q80ST9-2;REV__G5E887;REV__A0A087WRS6;REV__Q80ST9;REV__G5E886	REV__Q80ST9-2;REV__G5E887;REV__A0A087WRS6;REV__Q80ST9;REV__G5E886
0	0	0	0	0	0	0	6788700	1	1	1	0	0	0	7.5778	0.040568	0.4915	8220100	1	REV__A0A0G2JGE5;REV__A0A0G2JDE8;REV__A0A0G2JE03;REV__Q8BTZ4-2;REV__Q3TWF7;REV__A0A0G2JDM7;REV__Q8BTZ4	REV__A0A0G2JGE5;REV__A0A0G2JDE8;REV__A0A0G2JE03;REV__Q8BTZ4-2;REV__Q3TWF7;REV__A0A0G2JDM7;REV__Q8BTZ4
0	0	0	0	0	2324400	0	0	1	1	1	0	0	0	18.816	0.03854	0.49219	1741700	1	REV__A0A0N4SVE6;REV__A0A0N4SV03;REV__Q8BWY2	REV__A0A0N4SVE6;REV__A0A0N4SV03;REV__Q8BWY2
0	0	0	0	0	0	0	40166	1	1	1	0	0	0	70.827	0.048148	0.44535	296610	1	REV__A0A0R4J1A9;REV__Q8VC66	REV__A0A0R4J1A9;REV__Q8VC66
0	0	0	0	0	0	0	1064800	1	1	1	0	0	0	169.45	0.04291	0.45568	12387000	4	REV__Q8CAF4-3;REV__Q8CAF4;REV__A0A140LIZ7	REV__Q8CAF4-3;REV__Q8CAF4;REV__A0A140LIZ7
0	405290	0	0	0	0	0	0	1	1	1	0	0	0	53.731	1	-2	424980	1	REV__Q5DTN8-2;REV__A0A1B0GSY2;REV__Q5DTN8-3;REV__E9Q7K7;REV__Q5DTN8	REV__Q5DTN8-2;REV__A0A1B0GSY2;REV__Q5DTN8-3;REV__E9Q7K7;REV__Q5DTN8
0	0	0	0	0	577150000	0	0	1	1	1	0	0	0	26.681	0.048561	0.43484	403330000	1	REV__A0A1W2P6U2;REV__A0A1W2P8D1;REV__Q3TD49-2;REV__Q3TD49	REV__A0A1W2P6U2;REV__A0A1W2P8D1;REV__Q3TD49-2;REV__Q3TD49
0	0	0	0	0	0	0	124750	1	1	1	0	0	0	25.609	0.044693	0.45417	3177100	2	REV__A0A338P6A9;REV__A0A338P6V8;REV__E9Q7C1;REV__Q3TE00;REV__Q924H2	REV__A0A338P6A9;REV__A0A338P6V8;REV__E9Q7C1;REV__Q3TE00;REV__Q924H2
4506700	0	39218000	50759000	0	0	0	38875000	1	1	1	0	0	0	43.109	0.0062893	1.0322	199000000	7	REV__Q61183-2;REV__Q9WVP6;REV__A1L349;REV__E9PWC8;REV__E9PZR3;REV__E9QAN2;REV__Q61183	REV__Q61183-2;REV__Q9WVP6;REV__A1L349;REV__E9PWC8;REV__E9PZR3;REV__E9QAN2;REV__Q61183
0	0	0	0	0	0	0	360600	1	1	1	0	0	0	440.77	0.043137	0.47588	4255900	2	REV__Q69Z23-2;REV__E9Q7P0;REV__A2A520;REV__Q69Z23;REV__K3W4R0	REV__Q69Z23-2;REV__E9Q7P0;REV__A2A520;REV__Q69Z23;REV__K3W4R0
0	0	0	0	0	0	0	145760	1	1	1	0	0	0	93.961	0.04918	0.38881	810290	1	REV__J9JIB2;REV__A2AAJ9-2;REV__E9QQ96;REV__Z4YJE4;REV__H7BX05;REV__A2AAJ9	REV__J9JIB2;REV__A2AAJ9-2;REV__E9QQ96;REV__Z4YJE4;REV__H7BX05;REV__A2AAJ9
0	0	0	0	0	0	0	15524000	1	1	1	0	0	0	629.58	1	-2	40544000	1	REV__J3QMC5;REV__A2ANY6	REV__J3QMC5;REV__A2ANY6
0	0	0	0	0	0	0	77974	1	1	1	0	0	0	206.4	0.014881	0.95395	61519000	2	REV__A2BH40-4;REV__A2BH40-2;REV__A2BH40;REV__E9QAQ7	REV__A2BH40-4;REV__A2BH40-2;REV__A2BH40;REV__E9QAQ7
0	0	0	0	0	0	15703000	0	1	1	1	0	0	0	20.413	0.031891	0.59666	48742000	1	REV__D3YYM6;REV__D3Z1S8;REV__Q91V55;REV__P97461	REV__D3YYM6;REV__D3Z1S8;REV__Q91V55;REV__P97461
0	0	0	0	0	0	0	66687000	2	2	2	0	0	0	10.829	0.030374	0.61192	103030000	2	REV__E9Q705;REV__Q8CEI1;REV__E9PX89	REV__E9Q705;REV__Q8CEI1;REV__E9PX89
0	23399000	14938000	21876000	0	21168000	25682000	21870000	2	2	2	0	0	0	216.13	0.011905	0.95438	272550000	12	REV__E9PYK3	REV__E9PYK3
0	0	179360	0	0	0	0	0	1	1	1	0	0	0	70.564	1	-2	334190	1	REV__H3BJQ1;REV__Q7TN75;REV__E9Q3F7	REV__H3BJQ1;REV__Q7TN75;REV__E9Q3F7
0	0	0	0	0	0	0	2209300	1	1	1	0	0	0	25.832	1	-2	12365000	1	REV__F6S4D9;REV__Q9Z129-2;REV__E9Q3N0;REV__Q9Z129	REV__F6S4D9;REV__Q9Z129-2;REV__E9Q3N0;REV__Q9Z129
0	0	0	0	0	0	0	12243000	1	1	1	0	0	0	499.1	0.0041322	1.6555	149950000	12	REV__E9Q3W4;REV__Q9QXS1-16;REV__Q9QXS1-2;REV__Q9QXS1-8;REV__Q9QXS1-7;REV__Q9QXS1-6;REV__Q9QXS1-14;REV__Q9QXS1-4;REV__Q9QXS1-3;REV__Q9QXS1-15;REV__Q9QXS1-5;REV__Q9QXS1-13;REV__Q9QXS1-11;REV__Q9QXS1-12;REV__Q9QXS1-9;REV__Q9QXS1-10;REV__Q9QXS1	REV__E9Q3W4;REV__Q9QXS1-16;REV__Q9QXS1-2;REV__Q9QXS1-8;REV__Q9QXS1-7;REV__Q9QXS1-6;REV__Q9QXS1-14;REV__Q9QXS1-4;REV__Q9QXS1-3;REV__Q9QXS1-15;REV__Q9QXS1-5;REV__Q9QXS1-13;REV__Q9QXS1-11;REV__Q9QXS1-12;REV__Q9QXS1-9;REV__Q9QXS1-10;REV__Q9QXS1
0	0	0	0	0	0	0	4295000	1	1	1	0	0	0	191.89	0.046468	0.45209	5200700	1	REV__H3BLD7;REV__E9Q7N9	REV__H3BLD7;REV__E9Q7N9
0	880500	676830	1212600	0	927270	889540	762310	1	1	1	0	0	0	289.07	1	-2	7295600	4	REV__Q6A078;REV__E9Q9M0	REV__Q6A078;REV__E9Q9M0
1302200	0	0	0	0	0	0	0	1	1	1	0	0	0	6.8829	0.020672	0.74277	2604300	1	REV__F6TFM1;REV__Q9DBQ7-3;REV__Q9DBQ7	REV__F6TFM1;REV__Q9DBQ7-3;REV__Q9DBQ7
0	0	0	0	0	0	0	1834800	1	1	1	0	0	0	135.88	0.024213	0.6633	5330300	1	REV__F7CB97	REV__F7CB97
0	0	0	0	0	0	0	231160	1	1	1	0	0	0	105.79	0.035477	0.56194	675430	2	REV__G3UXH4;REV__G3UZM9;REV__Q8BWW9-2;REV__Q8BWW9	REV__G3UXH4;REV__G3UZM9;REV__Q8BWW9-2;REV__Q8BWW9
0	0	0	0	0	0	0	98118	1	1	1	0	0	0	42.921	0.025701	0.61424	989980	1	REV__O08689	REV__O08689
0	0	0	0	0	0	0	2108500	1	1	1	0	0	0	73.862	0.033408	0.56989	37985000	6	REV__P54731	REV__P54731
0	0	0	0	0	0	210540000	0	1	1	1	0	0	0	72.931	1	-2	267980000	1	REV__P70419	REV__P70419
0	0	0	0	0	0	0	481140	1	1	1	0	0	0	52.09	0.016807	0.83479	16944000	6	REV__P97817	REV__P97817
0	0	0	0	0	0	0	309470	1	1	1	0	0	0	349.41	0.04251	0.48821	708400	1	REV__Q62388	REV__Q62388
0	0	0	0	0	2830000	0	0	1	1	1	0	0	0	114.22	0.048611	0.41679	1977600	1	REV__Q68FE9	REV__Q68FE9
0	0	0	0	0	0	40503	0	2	2	2	0	0	0	61.536	0.0225	0.69977	3115400	1	REV__Q6A0D4;REV__D3Z731	REV__Q6A0D4;REV__D3Z731
0	0	0	0	0	0	471700	0	1	1	1	0	0	0	63.33	0.037037	0.54079	3478600	1	REV__Q6GQS8	REV__Q6GQS8
0	0	0	0	0	0	0	363850	1	1	1	0	0	0	104.54	1	-2	440560	1	REV__Q7M6Y6-3;REV__Q7M6Y6-2;REV__Q7M6Y6	REV__Q7M6Y6-3;REV__Q7M6Y6-2;REV__Q7M6Y6
0	0	0	0	0	0	0	164700000	1	1	1	0	0	0	47.884	0.0094044	1.0204	1012800000	13	REV__Q8CDA1-3;REV__Q8CDA1-2;REV__Q8CDA1	REV__Q8CDA1-3;REV__Q8CDA1-2;REV__Q8CDA1
0	0	0	0	0	0	0	14805000	1	1	1	0	0	0	79.132	1	-2	80745000	1	REV__Q8CFL8	REV__Q8CFL8
0	0	0	0	0	0	0	64676000	1	1	1	0	0	0	29.911	1	-2	253340000	1	REV__Q8R2H9	REV__Q8R2H9
0	0	0	0	0	0	765970	0	1	1	1	0	0	0	86.612	0.018919	0.79594	6843200	1	REV__Q9ERK0	REV__Q9ERK0
0	0	0	0	0	0	0	1026100	1	1	1	0	0	0	78.734	0.028037	0.61276	9625700	5	REV__Q9QZK2-2;REV__Q9QZK2	REV__Q9QZK2-2;REV__Q9QZK2
0	0	0	0	0	306770	0	0	1	1	1	0	0	0	22.906	0.049743	0.41028	3730000	1	REV__Q9R1P3	REV__Q9R1P3

## Sheet: Supplementary Table S9
Table S9: The p-value and log2 difference of proteins immunoprecipitating with DNAJC11-FLAG in cerebrum of Tg701 mice after statistical analysis with Perseus software in difference descending order for each cluster.
Protein IDs	Protein names	Gene names	Student's T-test p-value	Student's T-test Difference
Q7TSG5;Z4YK11;Q7TSG5-2	SH3 domain-containing protein 21	Sh3d21	0.0715204	5.55581
Q5U458;E9Q8B3;A2A8D1	DnaJ homolog subfamily C member 11	Dnajc11	4.86916e-05	4.65484
Q8CAQ8-2;Q8CAQ8;Q8CAQ8-5;E9Q800;Q8CAQ8-3;E9QAY6;A0A0U1RP81;A0A1B0GX08;A0A0U1RQ14;E9PVS5	MICOS complex subunit Mic60	Immt	0.00627051	3.16205
A0A140LIU3;P56391	Cytochrome c oxidase subunit 6B1	Cox6b1	0.033779	2.13518
J3QMG3;Q60931	Voltage-dependent anion-selective channel protein 3	Vdac3	0.00919102	2.01121
O88569-3;O88569-2;O88569;A0A0N4SUM2	Heterogeneous nuclear ribonucleoproteins A2/B1	Hnrnpa2b1	0.0234602	1.90854
A0A0A6YW67;E9Q9J0;E9Q4P0;E9Q5F6;E9QNP0;Q5SX22;P62984;P62983;P0CG49;P0CG50;D3YYZ2	Ubiquitin-60S ribosomal protein L40;Ubiquitin;60S ribosomal protein L40;Ubiquitin-40S ribosomal protein S27a;Ubiquitin;40S ribosomal protein S27a;Polyubiquitin-B;Ubiquitin;Polyubiquitin-C;Ubiquitin;Ubiquitin-related 1;Ubiquitin-related 2	Gm8797;Uba52;Kxd1;Ubc;Ubb;Rps27a	0.231464	1.74654
E9Q4M4;Q91VN4	MICOS complex subunit Mic25	Chchd6	0.0144118	1.68586
P15105	Glutamine synthetase	Glul	0.0955901	1.55061
G3UXT7;F6QCI0;Q8CFQ9;Q8BQ46;P56959	RNA-binding protein FUS	Fus;Taf15	0.0510368	1.52591
Q60932;Q60932-2;F2Z471	Voltage-dependent anion-selective channel protein 1	Vdac1	0.0137297	1.52365
G3UX26;Q60930;D3YZT5;A0A286YCR8;D3YUN8	Voltage-dependent anion-selective channel protein 2	Vdac2	0.0798556	1.50385
Q9JKK7;Q9JKK7-3;A0A1L1SU70;A0A1L1SRR7;Q9JKK7-2	Tropomodulin-2	Tmod2	0.179627	1.47277
Q8BGH2	Sorting and assembly machinery component 50 homolog	Samm50	0.0439554	1.44083
A0A2I3BRL8;Q91VM5;Q9WV02;A2AFI4;A2AFI3;Q9WV02-2;A0A2I3BQC0;S4R1F6	RNA binding motif protein, X-linked-like-1;RNA-binding motif protein, X chromosome;RNA-binding motif protein, X chromosome, N-terminally processed	Rbmxl1;Rbmx	0.143898	1.3934
Q99J09;F7D5L2	Methylosome protein 50	Wdr77	0.126657	1.37522
D3Z6I8;E9Q7Q3;P21107-2;D3Z2H9;A0A0R4J1P2;E9Q5J9;P21107;D3YVR0	Tropomyosin alpha-3 chain	Tpm3;Tpm3-rs7	0.0927354	1.37167
P43274	Histone H1.4	Hist1h1e	0.234648	1.28484
Q91VB8;P01942	Hemoglobin subunit alpha	haemaglobin alpha 2;Hba	0.0706724	1.23908
P56942	Pro-MCH;Neuropeptide-glycine-glutamic acid;Neuropeptide-glutamic acid-isoleucine;Melanin-concentrating hormone	Pmch	0.268869	1.23463
F7BNZ5;Q80YN3;A2AVX1;E9Q8Q5	Breast carcinoma-amplified sequence 1 homolog	Bcas1	0.0173934	1.15075
E9Q453;G5E8R0;E9Q455;E9Q456;G5E8R1;G5E8R2;E9Q452;E9Q454;E9Q450;E9Q448;B7ZNL3;Q8BP43;Q8BSH3;S4R261;F8WID5;P58771-2;P58771;A2AIM4;A2AIM5;CON__Q3SX28;S4R2U0;P58774-2;P58774		Tpm1	0.199929	1.13457
Q91XV3	Brain acid soluble protein 1	Basp1	0.0471731	1.11572
Q8BP67;F6RSK3	60S ribosomal protein L24	Rpl24	0.195581	1.09283
Q9D6F9	Tubulin beta-4A chain	Tubb4a	0.235792	1.07709
P97450;E9QAD6	ATP synthase-coupling factor 6, mitochondrial	Atp5j	0.14384	1.04814
P09405	Nucleolin	Ncl	0.220549	1.04238
Q9ERD7;A0A1D5RM76;CON__ENSEMBL:ENSBTAP00000025008;A2AQ07	Tubulin beta-3 chain	Tubb3	0.181008	1.03014
Q9JHJ0;A0A1L1SQ12;A0A1L1SR42	Tropomodulin-3	Tmod3	0.269658	1.02692
Q99KJ8	Dynactin subunit 2	Dctn2	0.239451	0.994905
Q810B6;Q810B6-2	Rabankyrin-5	Ankfy1	0.225643	0.982869
Q8BGD9;B2RWE8	Eukaryotic translation initiation factor 4B	Eif4b	0.186439	0.974513
D3YWC2;D3Z6F1;Q9JM93	ADP-ribosylation factor-like protein 6-interacting protein 4	Arl6ip4	0.14583	0.964778
Q792Z1		Try10	0.2376	0.951151
P40124;B1ARS0	Adenylyl cyclase-associated protein 1	Cap1	0.153803	0.947198
E9Q5B6;F6ZV59;G5E8G0;G3X9W0;Q60668-4;Q60668-3;Q60668-2;Q60668;F6SHF3	Heterogeneous nuclear ribonucleoprotein D0	Hnrnpd	0.129573	0.941747
Q9DB20;A0A338P7G3;A0A338P776;F7D3P8;F6XVM5	ATP synthase subunit O, mitochondrial	Atp5o	0.198324	0.903657
P29341;A0A2I3BR37;Q9D4E6;V9GXG3;Q8C7D3;Q91YZ8;A3KFU5;A3KFU8;Q6PHQ9	Polyadenylate-binding protein 1;Polyadenylate-binding protein	Pabpc1;Pabpc6	0.195597	0.886969
P61264	Syntaxin-1B	Stx1b	0.10281	0.865023
Q8CHP5-2;Q8CHP5	Partner of Y14 and mago	Wibg	0.243259	0.85959
A0A075B5P6;A0A075B6A0;P01872;P01872-2	Ig mu chain C region	Ighm	0.179269	0.859453
Q3U1J4	DNA damage-binding protein 1	Ddb1	0.0906668	0.848786
A0A075B5V7;A0A075B5V6;A0A075B5V1;A0A075B5U6;A0A0A6YY38;A0A0A6YXN5;A0A0A6YX66;A0A0A6YWK5;A0A075B5V2;A0A075B5V0;A0A075B5U7;P06330	Ig heavy chain V region AC38 205.12	Ighv1-43;Ighv1-42;Ighv1-31;Ighv1-20;Ighv1-34;Ighv1-26;Ighv1-22	0.3999	0.8382
P60824;D3YU80;K4DI65	Cold-inducible RNA-binding protein	Cirbp	0.175255	0.831254
D3YTR7;Q9CYT6;A0A286YCS6	Adenylyl cyclase-associated protein;Adenylyl cyclase-associated protein 2	Cap2	0.138244	0.815352
Q6ZWQ9;Q3THE2;D3YV37;Q9CQ19;D3Z249	Myosin regulatory light chain 12B;Myosin regulatory light polypeptide 9	Myl12a;Myl12b;Myl9	0.0512694	0.750298
O35129;F6QPR1;F6Q8V7	Prohibitin-2	Phb2	0.154572	0.749036
H3BLF7;H3BKR2;P62874;D3Z1T4;D3Z1M1;D3YZX3;E9QKR0;P62880;P29387	Guanine nucleotide-binding protein G(I)/G(S)/G(T) subunit beta-1;Guanine nucleotide-binding protein G(I)/G(S)/G(T) subunit beta-2;Guanine nucleotide-binding protein subunit beta-4	Gnb1;Gnb2;Gnb4	0.0860619	0.743433
O35295	Transcriptional activator protein Pur-beta	Purb	0.251576	0.732285
P56564;D3YY51;A0A1W2P762;O35544	Excitatory amino acid transporter 1	Slc1a3	0.271182	0.731389
P56480	ATP synthase subunit beta, mitochondrial	Atp5b	0.146554	0.709816
P26645	Myristoylated alanine-rich C-kinase substrate	Marcks	0.151201	0.694903
P47754;A0A0G2JE27;A0A0N4SVM0;D6RCW7;Q5RKN9;P47753	F-actin-capping protein subunit alpha-2;F-actin-capping protein subunit alpha-1	Capza2;Capza1	0.285289	0.688332
O08583;Q9JJW6-2;O08583-2	THO complex subunit 4	Alyref	0.131929	0.67313
A2AL12;B2RXM2;J3QNY1;Q8BG05-2;Q8BG05;A2AL13	Heterogeneous nuclear ribonucleoprotein A3	Hnrnpa3;Gm6793;Gm9242	0.273798	0.632655
F8WGL3;P18760	Cofilin-1	Cfl1	0.242181	0.627161
B0QZN5;P63044;P63024;A0A0N4SUV3;D3YTU0;Q62442-2;Q62442	Vesicle-associated membrane protein 2;Vesicle-associated membrane protein 3	Vamp2;Vamp3	0.252671	0.618639
A0A075B5X6;A0A0G2JFN9		Ighv1-67	0.386626	0.611784
P84089;A0A1W2P7H9;A0A1W2P7T3;G3UW85	Enhancer of rudimentary homolog	Erh	0.287659	0.596924
F6VME3;F6RT34;P04370-5;P04370-10;P04370-4;F6RWW8;F6TYB7;P04370-14;P04370-8;P04370-13;P04370-6;P04370-11;P04370;P04370-2	Myelin basic protein	Mbp	0.278994	0.590541
A0A1L1SQA8;P62852	40S ribosomal protein S25	Rps25	0.307363	0.590014
D3YUT3;D3YUG3;D3Z5R8;D3Z722;Q9CZX8;S4R223	40S ribosomal protein S19	Rps19	0.323811	0.540247
Q02257	Junction plakoglobin	Jup	0.327846	0.518336
A0A0R4J1E3;Q9QXS6-3;Q9QXS6;Q9QXS6-2;F7CPL2	Drebrin	Dbn1	0.30351	0.51729
P01837	Ig kappa chain C region		0.275163	0.500268
B0V2N8;B0V2N7;P07356;B0V2N5	Annexin;Annexin A2	Anxa2	0.285353	0.484784
F6YVP7;A0A1Y7VKY1;P62270;S4R1N6	40S ribosomal protein S18	Gm10260;Rps18	0.316749	0.479513
O35526;D6RFB9;A0A0J9YUA0	Syntaxin-1A	Stx1a	0.277523	0.473358
P14148;F6XI62	60S ribosomal protein L7	Rpl7	0.348641	0.370934
Q3U7K7;Q62191	E3 ubiquitin-protein ligase TRIM21	Trim21	0.227789	0.356097
Q7TMM9	Tubulin beta-2A chain	Tubb2a	0.301635	0.349709
P17182;B0QZL1;Q6PHC1;A0A0N4SUI6;B1ARR6;B1ARR7;D3YVD3;D3Z2S4;D3Z6E4;A0A0N4SUX5;P17183;A0A0N4SUW8;Q5SX61;Q5SX60;Q5SX59;P21550	Alpha-enolase;Enolase	Eno1	0.36358	0.339771
A0A0R4J1H6;E9QP99;P55937-1;P55937	Golgin subfamily A member 3	Golga3	0.273089	0.312889
A0A0G2JES3;A0A140T8T4;P51410;A0A0G2JFQ3;D3YZT0;D3Z629;S4R1R7	60S ribosomal protein L9	Rpl9;Rpl9-ps1	0.305049	0.308756
A0A0A6YW88;Q3UHL1	CaM kinase-like vesicle-associated protein	Camkv	0.317399	0.300942
Q9CRB9;S4R238;F6QFL0;Q9D9P1;D3Z0L4	MICOS complex subunit Mic19	Chchd3	0.308431	0.292193
Q8VDD5;A0A2R8W6V7	Myosin-9	Myh9	0.368083	0.280664
A0A075B5R5;A0A075B5P7;A0A0A6YWG4;A0A0A6YVX8;A0A075B5Q2;P01806;P18524;P01812;P01809;P01810;P01808;P01807	Ig heavy chain V region 441;Ig heavy chain V region RF;Ig heavy chain V region MOPC 173;Ig heavy chain V region X24;Ig heavy chain V region J539;Ig heavy chain V region T601;Ig heavy chain V region X44	Ighv4-1;Ighv5-2;Ighv5-12-4;Ighv5-9	0.272052	0.275071
A3KGU5;A3KGU7;E9Q447;A3KGU9;P16546-2;P16546;A3KGU4;P08032	Spectrin alpha chain, non-erythrocytic 1	Sptan1	0.360927	0.262974
Q99NF7;P36993-4;P36993;P36993-3;P36993-5	Protein phosphatase 1B	Ppm1b	0.151561	0.262883
Q8BRT1;Q08EB5;E9Q8N5;Q08EB6;F7DCH5;J3QP81;E9QKH0;A0A087WRE8;E9QNY9;A0A087WP42;A0A087WRK0;A0A087WNW8;A0A087WQ95;A0A087WQF1;A0A087WS18;Q80TV8;E9Q6L0;A0A0A6YXZ1;A0A1L1ST22;Q8BSE7;A0A087WQ31;Q8BRT1-6;Q8BRT1-5;Q80TV8-2;A0A0N4SUT7;A0A1L1SRY3	CLIP-associating protein 2	Clasp2	0.403685	0.261531
Q8BTI8-3;Q8BTI8-2;Q8BTI8;A0A087WPS9;A0A087WRX8	Serine/arginine repetitive matrix protein 2	Srrm2	0.280338	0.248835
A0A0A0MQF6;P16858;S4R1W1;A0A1D5RLD8;S4R257;S4R1W8;V9GX06;S4R1N5;V9GXA7;A0A0R4J0X7;S4R2G5;Q64467	Glyceraldehyde-3-phosphate dehydrogenase	Gapdh;Gm3839	0.25545	0.241631
A0A1B0GSS8;A0A1B0GQU8;P35980;A0A1B0GSF7;A0A1B0GSA8;A0A1B0GRZ3	60S ribosomal protein L18	Rpl18	0.407586	0.234598
P14869;S4R1N1;D3YVM5	60S acidic ribosomal protein P0	Rplp0	0.340609	0.214559
Q504P4;P63017;D3Z5E2;Q61696;P16627;P17879	Heat shock cognate 71 kDa protein	Hspa8	0.218608	0.206486
Q8C2Q8;Q91VR2;A2AKV1;A2AKV2;A2AKV3;A2AKU9	ATP synthase subunit gamma;ATP synthase subunit gamma, mitochondrial	Atp5c1	0.371022	0.200361
P62855	40S ribosomal protein S26	Rps26	0.42733	0.180339
A0A0N4SVQ1;Q62425	Cytochrome c oxidase subunit NDUFA4	Ndufa4	0.432336	0.178609
Q9JMG7;Q9JMG7-2	Hepatoma-derived growth factor-related protein 3	Hdgfrp3	0.437103	0.17196
A2AMW0;P47757-2;P47757;P47757-4;A0A0A0MQI9;F6YHZ8;F7CAZ6	F-actin-capping protein subunit beta	Capzb	0.426466	0.166843
P49443;Q9EQE2;A0A1Y7VJZ4	Protein phosphatase 1A	Ppm1a	0.403017	0.144417
P07901;E9Q3D6;B7ZC50	Heat shock protein HSP 90-alpha	Hsp90aa1;Hsp90ab1	0.450809	0.141811
P18872-2;P18872;D3Z2M7;F7BLT7;P08752;Q9DC51;B2RSH2;A2A610;A0A0A6YWA9;A2AE32;Q66L47;Z4YKV1;P63094;Q6R0H7-4;A2AE31;Q8CGK7;P63094-2;Q3V3I2;P50149;P20612;Q6R0H7	Guanine nucleotide-binding protein G(o) subunit alpha	Gnao1	0.359585	0.140993
P14094;A0A0A6YX05	Sodium/potassium-transporting ATPase subunit beta-1	Atp1b1	0.465791	0.115963
H7BX95;Q6PDM2-3;Q6PDM2-2;Q6PDM2;F7AI47	Serine/arginine-rich splicing factor 1	Srsf1	0.450865	0.104424
E9Q557;E9PZW0	Desmoplakin	Dsp	0.474666	0.091341
P11087;P11087-2	Collagen alpha-1(I) chain	Col1a1	0.439184	0.0816193
P51881	ADP/ATP translocase 2;ADP/ATP translocase 2, N-terminally processed	Slc25a5	0.433117	0.0649767
P99024	Tubulin beta-5 chain	Tubb5	0.42397	0.0595136
Q9JIS5	Synaptic vesicle glycoprotein 2A	Sv2a	0.46076	0.0579643
P20357;G3UZK9;G3UZE9;F7ALC8;Q80X35;Q80ZL4;Q3TLQ0;G3UZV6;G3UWW1;E9Q8Y2	Microtubule-associated protein 2	Map2	0.47588	0.0221128
Q8BLE7;A0A0R4J0A6;A0A140LHC9	Vesicular glutamate transporter 2	Slc17a6	0.44402	0.0203986
P47963	60S ribosomal protein L13	Rpl13	0.49419	0.00915289
P61979-2;P61979;P61979-3;B2M1R6;H3BLL4;A0A286YDM3;H3BKD0;H3BK96;H3BKI8;A0A286YCM2;H3BLP7;A0A286YEC4;A0A286YDH1;Q8BT23;H3BJ43;H3BJS9;A0A286YE41	Heterogeneous nuclear ribonucleoprotein K	Hnrnpk	0.51982	-0.0211477
P17751;H7BXC3	Triosephosphate isomerase	Tpi1	0.511464	-0.0233941
P62908;A0A140LI77;D3YV43	40S ribosomal protein S3	Rps3	0.508945	-0.0265784
P68134;P68033;P63268;P62737;A0A1D5RM20;D3Z2K3;D3YZY0	Actin, alpha skeletal muscle;Actin, alpha cardiac muscle 1;Actin, gamma-enteric smooth muscle;Actin, aortic smooth muscle	Acta1;Actc1;Actg2;Acta2	0.511858	-0.0335102
Q6ZWN5;F7CJS8;D3YWH9;Q9CXW7	40S ribosomal protein S9	Rps9	0.537534	-0.0350652
P60710;E9Q1F2;E9Q5F4;G3UZ07;F8WGM8;E9Q2D1;F6WX90;V9GXQ2;A0A0U1RQ96	Actin, cytoplasmic 1;Actin, cytoplasmic 1, N-terminally processed	Actb;Actg1	0.552971	-0.0405102
P60202;P60202-2	Myelin proteolipid protein	Plp1	0.52045	-0.0413361
P62960;A2BGG7;A0A0A0MQD2;B2RUF0;Q9Z2C8-2;Q9JKB3-2;Q9Z2C8;Q9JKB3	Nuclease-sensitive element-binding protein 1;Y-box-binding protein 2;Y-box-binding protein 3	Ybx1;Ybx2;Ybx3	0.532495	-0.0576596
Q03265;D3Z6F5;D6RJ16	ATP synthase subunit alpha, mitochondrial;ATP synthase subunit alpha	Atp5a1	0.60216	-0.0589514
P62702;V9GWY0	40S ribosomal protein S4, X isoform	Rps4x	0.536065	-0.0758886
P84104;P84104-2;A2A4X6	Serine/arginine-rich splicing factor 3	Srsf3;Gm12355	0.645704	-0.0821075
Q9CR57;A0A1L1SUF6	60S ribosomal protein L14	Rpl14	0.529455	-0.0837114
A2ARP8;Q9QYR6;Q9QYR6-2	Microtubule-associated protein 1A;MAP1A heavy chain;MAP1 light chain LC2	Map1a	0.584869	-0.0838904
Q62261;Q62261-2;A0A0A0MQG2;Q68FG2;E9Q397;Q3UGX2;Q91ZE6;E9PX29;P15508	Spectrin beta chain, non-erythrocytic 1	Sptbn1	0.594989	-0.0932417
P46096;A0A0R4J2C2;P46097;Q9R0N5	Synaptotagmin-1	Syt1	0.57557	-0.101512
P63325;A0A338P731;Q3UW83;A0A338P7K4	40S ribosomal protein S10	Rps10	0.542404	-0.101513
I7HJQ9;Q9Z2C4;F6T9H9;Q8CIU6;Q8CIU3;Q8CIU5;I7HPV7	Myotubularin-related protein 1	Mtmr1	0.551578	-0.132853
P68404-2;P68404	Protein kinase C beta type	Prkcb	0.726604	-0.133924
Q99MR8;A0A0G2JF64;A0A0G2JFQ5	Methylcrotonoyl-CoA carboxylase subunit alpha, mitochondrial	Mccc1	0.827303	-0.143092
P42669	Transcriptional activator protein Pur-alpha	Pura	0.686863	-0.143972
F6YY69;F6VW30;P68254-2;P68254;Q9CQV8-2;Q9CQV8	14-3-3 protein theta	Ywhaq	0.666865	-0.153585
A2A547;P84099	Ribosomal protein L19;60S ribosomal protein L19	Rpl19	0.656037	-0.164066
A8DUK4;E9Q223;P02088;CON__P02070;CON__Q3SX09;P02104	Hemoglobin subunit beta-1	Hbbt1;Hbb-bs;Hbb-b1	0.680542	-0.167513
P68372;G3UZR1	Tubulin beta-4B chain	Tubb4b	0.713452	-0.169608
A0A0R4J049;Q8CIG8;F6QQQ6;A0A2I3BRG2;S4R295	Protein arginine N-methyltransferase 5	Prmt5	0.662436	-0.173561
Q7TSJ2;A0A140LIT9;D3Z6W1;Q7TSJ2-2;Q7TSJ2-3	Microtubule-associated protein 6	Map6	0.717747	-0.177783
Q569Z5;F8WHR6;Q569Z5-2;A0A2R8VHK2	Probable ATP-dependent RNA helicase DDX46	Ddx46	0.594856	-0.187366
S4R1I6;Q8BTS0;Q61656;Q3TU25;Q3U741;Q501J6-2;Q501J6;B1ARB9	Probable ATP-dependent RNA helicase DDX5;Probable ATP-dependent RNA helicase DDX17	Ddx5;Ddx17	0.595152	-0.194366
D3YX34;E9Q586;E9Q3M3;O08788-2;O08788	Dynactin subunit 1	Dctn1	0.724886	-0.212652
P14873	Microtubule-associated protein 1B;MAP1B heavy chain;MAP1 light chain LC1	Map1b	0.744153	-0.216384
P62242	40S ribosomal protein S8	Rps8	0.750812	-0.219274
Q9JHU4	Cytoplasmic dynein 1 heavy chain 1	Dync1h1	0.856823	-0.226752
E9PYL9;Q9CXW4;E9PZB3;A2BH06	60S ribosomal protein L11	Gm10036;Rpl11;Gm5093	0.782394	-0.228364
P48962;Q3V132	ADP/ATP translocase 1	Slc25a4	0.744054	-0.232404
P62806	Histone H4	Hist1h4a	0.64241	-0.235246
P43006;A2APL5;P43006-2;P43006-3;F6ZRK3;F7CAM6	Excitatory amino acid transporter 2;Amino acid transporter	Slc1a2	0.754193	-0.249698
P01868;P01869;A0A075B5P4;A0A0A6YWR2	Ig gamma-1 chain C region secreted form;Ig gamma-1 chain C region, membrane-bound form	Ighg1	0.704711	-0.250216
Q9DBG3;Q9DBG3-2;H3BKM0;H3BIY9;Q5SVG5;Q5SVG4;O35643;H3BJ06	AP-2 complex subunit beta;AP complex subunit beta	Ap2b1	0.705069	-0.254849
P05213;A0A2R8VHF3	Tubulin alpha-1B chain	Tuba1b	0.854958	-0.260515
P17427	AP-2 complex subunit alpha-2	Ap2a2	0.761567	-0.27215
S4R2P9-2;E9PX50;S4R2P9;S4R2V4		Slc8a3	0.885878	-0.280214
P20918;CON__P06868	Plasminogen;Plasmin heavy chain A;Activation peptide;Angiostatin;Plasmin heavy chain A, short form;Plasmin light chain B	Plg	0.58083	-0.281746
G5E829;Q8C048;A2ALL9;Q0VF55;Q6Q477-2;F7AAP4;E9Q828;Q6Q477;A0A1W2P867	Plasma membrane calcium-transporting ATPase 1;Calcium-transporting ATPase	Atp2b1;Atp2b3;Atp2b4	0.861405	-0.283159
P11798;F8WIS9;F8WHB5;P11798-2;Q8CCM0;E9Q1V9;E9Q1W0;E9Q1T1;A0A0G2JGS4;Q6PHZ2-2;Q6PHZ2-4;Q6PHZ2;Q6PHZ2-5;D3Z7K9;F6WHR9	Calcium/calmodulin-dependent protein kinase type II subunit alpha	Camk2a	0.795929	-0.288132
P46460;G3UX86;G3UX98	Vesicle-fusing ATPase	Nsf	0.794086	-0.293614
P28652;Q5SVI9;Q5SVI2;Q5SVJ0;Q5SVI3;Q5SVI0;Q5SVI1;Q68EG2;Q5SVJ1;Q923T9-2;Q923T9;A0A2I3BQP6;Q923T9-3;A0A286YCW8;A0A286YCB8;A0A286YCH4;A0A286YDK9	Calcium/calmodulin-dependent protein kinase type II subunit beta	Camk2b	0.870186	-0.297198
P63318;Q2NKI4;A0A0N4SWF4;Q3TQ39	Protein kinase C gamma type;Protein kinase C	Prkcg	0.691037	-0.306531
Q5SV64;Q3UH59;Q61879;A0A140LI60;Q8BXF2;E9Q264;B1AR69;G3UW82;Q91Z83;P13542;Q02566;Q5SX39;P13541;A2AQP0;Q5SX40	Myosin-10	Myh10	0.814248	-0.309666
[truncated: 40 more rows]

## Sheet: Supplementary Table S10
Table S10: Cellular component content and biological process content of putative DNAJC11 interactors in the cerebrum of Tg701 mice grouped in Enrichment analysis of Cytoscape using the ClueGO/CluePedia plugins, presented in Figure 5C-D.
[truncated: 12 more rows]

[truncated: 1 more sheets: Supplementary Table S11]
